# Supplementary material for: O-GlcNAc signaling increases neuron regeneration through one-carbon metabolism in Caenorhabditis elegans
Source: eLife. 2024 Feb 9;13:e86478. doi: 10.7554/eLife.86478 (PMC10857789; doi:10.7554/eLife.86478)
Supplement: Figure 1—source data 1. [file elife-86478-fig1-data1.xlsx]

## Sheet: Fig 1B
WT_NGM	OGT-1_NGM	OGT-1-dAl_NGM
31.04	211.29	158.132
19.46	204.43	154.176
82.61	192.08	144.909
80.47	214.68	147.302
158.06	131.31	172.81
154.34	176.23	165.747
162.9	105.64	69.2762
72.86	211.7	152.328
57.38	154.81	121.575
93.08	98.26	157.618
55.72	167.11	185.917
70.99	170.49	111.503
95.97	215.64	172.3
163.06	117.12	117.293
178.73	159.47	154.94
109.27	189.71	164.321
182.22	188.77	156.881
151.66	211.89	227.729
161.92	220.3	147.187
167.89	224.21	216.574
85.07	203	130.66
103.65	294.56	81.5134
93.74	136.56	160.201
128.65	304.76	212.994
185.84	226.69	109.341
142.78	199.38	144.905
223.09	151.94	152.595
86.98	194.43	155.998
181.9	189.51
215.64	143.4
193.29	268.54
	230.59
	138.86
	220.23
	168.95
N=31	N=35	N=28

## Sheet: Fig1C
TU_RNAi_Cntrl	OGT-1_TU_RNAi_Cntrl	TU_gfat-1_RNAi	OGT-1_TU_gfat-1_RNAi	TU_gfat-2_RNAi	OGT-1_TU_gfat-2_RNAi
80.02	165.22	158.14	158.81	214.45	194.48
106.67	131.14	164.34	214.61	221.91	214.22
89.1	142.83	139.82	275.57	179.07	183.99
46.78	147.53	173.65	210.12	185.55	304.64
96.38	167.78	242.02	276.51	199.15	188.89
102.05	119.04	164.89	202.53	147.48	246.68
71.48	89.31	114.33	175.16	207.8	232.31
66.52	189.82	115.47	259.32	155.11	243.29
94.4	223.61	195.89	166.77	164.27	202.48
116.56	168.33	139.91	208.61	166.06	199.13
112.33	117.45	229.76	89.03	89.78	195.91
60.14	129.9	150.15	184.18	155.41	208.91
134.16	139.5	229.58	143.68	181.8	243.33
106.33	112.19	152.03	232.5	260.96	115.11
71.43	216.76	132.05	264.41		219.49
61.24	205.13	241.78	208.98		157.93
69.86	205.36	104.64	220.58
80.2	206.76	137.48	151.04
62.49	136.32	241.63	121
172.73	214.62	167.07	130.93
115.27	137.19		183.47
172.22	132.82		174.32
151.66	142.25		124.78
161.92	173.55		178.53
157.89	233.71
95.07	125.79
103.65	125.94
103.74	194.33
126.65	121.81
N=29	N=29	N=20	N=24	N=15	N=16

## Sheet: Fig1D
WT_NGM	OGT-1_NGM	TU_pyk-1_RNAi	OGT-1_TU_pyk-1_RNAi	TU_atp-3_RNAi	OGT-1-TU_atp-3_RNAi
31.04	211.29	169.47	159.87	83.26	132.13
19.46	204.43	130.22	234.38	86.75	110.03
82.61	192.08	226.01	214.96	122.07	161.97
80.47	214.68	196.53	163.89	115.14	69.81
158.06	131.31	218.38	141.43	89.29	121.03
154.34	176.23	261.68	78.39	153.55	71.25
162.9	105.64	169.89	95.91	189.56	169.28
72.86	211.7	253.75	159.16	73.28	39.63
57.38	154.81	189.01	140.63	123.69	64.1
93.08	98.26	128.06	219.15	123.19	158.79
55.72	167.11	145.07	134.54	154.32	155.31
70.99	170.49	116.39	149.25	72.89	139.8
95.97	215.64	129.89	209.72	111.81	169.24
163.06	117.12	109.71	220.06	89.86	101.66
178.73	159.47	223.9	163.03	111.8	171.46
109.27	189.71	216.87	195.61	118.58	188.53
182.22	188.77	150.05	241.09	95.09	85
151.66	211.89	123.37	234.21	175.12	80.48
161.92	220.3	73.64	94.66	106.9	152.65
167.89	224.21	110.58	193.07	81.98	74.16
85.07	203	129.59	166.83	178.9	120.19
103.65	294.56	150.53	175.05	231.12	146.67
93.74	136.56	165.81	168.17	129.52	100.63
128.65	304.76	224.8	266.68	215.61	118.57
185.84	226.69	193.86	177.37	181.25	78.81
142.78	199.38	92.15	242.77	189.69	129.41
223.09	151.94	196.52	152.56	161.09	83.73
86.98	194.43	173.16	176.64	136.61
181.9	189.51		149.75	90.58
215.64	143.4		263.1
193.29	268.54		134.21
	230.59		146.03
	138.86
	220.23
	168.95
N=31	N=35	N=28	N=32	N=29	N=27

## Sheet: Fig 1F
WT_CAmA	OGT-1_CAmA
0.63	0.86
0.72	0.44
0.67	0.43
0.63	0.41
0.81	0.35
0.55	0.53
0.64	0.36
0.62	0.66
0.93	0.39
0.43	0.7
0.8	0.38
0.49	0.41
0.79	0.29
0.51	0.59
0.58	0.27
0.7	0.26
0.77	0.32
0.45	0.62
0.54	0.27
	0.45
	0.56
N=19	N=21
