# Supplementary material for: O-GlcNAc signaling increases neuron regeneration through one-carbon metabolism in Caenorhabditis elegans
Source: eLife. 2024 Feb 9;13:e86478. doi: 10.7554/eLife.86478 (PMC10857789; doi:10.7554/eLife.86478)
Supplement: Figure 2—source data 1. [file elife-86478-fig2-data1.xls]

## Sheet: WT-vs-OGT-1_DEGs
Gene ID	Gene Symbol	Type	log2 (Ogt-1/WT)	FDR (WT-vs-OGT-1)
180646	vit-4	mRNA	-3.86409	0
188646	T20D4.10	mRNA	1.85953	3.86158e-30
187892	R102.6	mRNA	1.21736	3.55985e-06
189802	Y40H7A.3	mRNA	-6.44294	7.05109e-06
177290	C24D10.2	mRNA	-1.04628	5.69167e-10
178694	C45H4.14	mRNA	-3.33498	0.000762984
180118	T25E12.6	mRNA	-6.2854	3.63874e-06
172608	sre-23	mRNA	4.11548	0.000329648
185238	F33H2.8	mRNA	1.16234	1.58704e-13
191560	ZK1307.3	mRNA	-1.11244	2.61493e-05
174102	ift-74	mRNA	1.06942	0.000561542
175565	ckb-2	mRNA	2.04196	3.14944e-305
3896798	Y54G2A.41	mRNA	1.33223	0.000147851
188356	cyp-13A5	mRNA	1.35548	6.37187e-93
185308	F35F10.1	mRNA	1.57256	2.74186e-30
176469	F43D9.1	mRNA	1.20915	6.10823e-48
3565987	Y102A5C.36	mRNA	-10.6284	1.96553e-22
184927	F25E5.8	mRNA	1.08002	5.8585e-73
181000	clc-5	mRNA	1.60451	1.83438e-21
3564810	picc-1	mRNA	-1.03843	1.09138e-48
245998	Y51F10.2	mRNA	-2.21327	2.17376e-193
177310	ZK354.2	mRNA	-1.11643	5.4144e-48
175513	R10E9.2	mRNA	-1.22233	2.03436e-80
189842	Y42H9AR.2	mRNA	-1.11391	4.95091e-05
188846	T24C4.5	mRNA	-1.34316	5.19195e-30
177277	R13H9.6	mRNA	-1.48373	4.99933e-33
176471	sip-1	mRNA	-2.93901	0
175403	F56F11.4	mRNA	-1.13268	2.25519e-37
7040175	E02H4.7	mRNA	-1.25964	3.23754e-15
178763	arrd-18	mRNA	1.28376	7.68127e-46
179997	T01C3.3	mRNA	-2.41063	3.84456e-107
174501	R09D1.12	mRNA	-3.26679	5.53288e-06
182951	C27A7.6	mRNA	-1.70472	3.79733e-65
187559	R03H10.7	mRNA	1.16361	4.76663e-08
188123	dylt-3	mRNA	-2.09482	1.36396e-05
175586	cpg-1	mRNA	-2.70666	0
175952	lim-8	mRNA	-1.01411	3.50274e-105
180076	F14H3.4	mRNA	-3.38441	2.92055e-22
182009	B0496.6	mRNA	-1.29574	9.24932e-06
174340	skpo-1	mRNA	-3.45908	0
177844	msp-77	mRNA	-1.58156	1.38112e-285
176760	T03F6.3	mRNA	-1.12565	7.12779e-75
191737	old-1	mRNA	1.71272	3.09681e-09
259611	R02C2.7	mRNA	1.24951	9.17449e-09
6418658	T12B5.14	mRNA	-1.93115	1.48146e-25
175891	F47D12.7	mRNA	-1.27326	7.34769e-40
181432	nhr-25	mRNA	1.53511	2.97178e-40
182122	C02F5.5	mRNA	-1.17745	4.389e-13
174756	twk-5	mRNA	-1.0304	2.10548e-10
178589	K09C6.7	mRNA	-1.42843	9.27157e-60
185764	rgs-10	mRNA	-4.59694	9.07888e-07
176262	ZK637.12	mRNA	-1.1832	6.5457e-14
177749	flh-1	mRNA	-1.0538	6.40962e-52
186147	F53A9.9	mRNA	1.08363	1.98281e-14
184536	dct-7	mRNA	4.26053	5.17722e-05
13223505	C29F7.10	mRNA	-3.84435	1.04589e-06
181438	R03G8.6	mRNA	-2.69823	5.14089e-153
188399	cyp-34A1	mRNA	3.08746	1.90622e-15
177828	msp-10	mRNA	-1.62946	3.28268e-231
180106	nhr-54	mRNA	1.05143	0.000142722
172056	Y119C1B.1	mRNA	-1.05552	7.07621e-10
171950	ptr-2	mRNA	-1.00255	7.10948e-165
185179	F31F7.1	mRNA	1.25498	5.70289e-181
177406	puf-11	mRNA	-2.00198	0
6418708	C45B11.6	mRNA	1.5979	7.7065e-14
172292	nspd-1	mRNA	-1.50262	2.0553e-29
177661	mpst-6	mRNA	-1.53066	4.10411e-20
180507	rgs-8.1	mRNA	-2.37917	8.81496e-11
3565170	C30G7.3	mRNA	-1.12557	4.94655e-37
190309	Y55F3AM.11	mRNA	1.09092	2.3581e-25
188376	T10C6.7	mRNA	-3.46139	1.70065e-36
177307	F36H12.3	mRNA	-1.32144	1.33774e-23
189291	W08E12.2	mRNA	1.28911	5.30514e-49
172848	Y106G6A.4	mRNA	-1.76865	3.19392e-33
176869	daf-18	mRNA	-1.51359	0
183790	C54E4.5	mRNA	1.19122	1.16072e-41
185201	neg-1	mRNA	-1.29961	9.55391e-36
175687	C45G9.9	mRNA	-1.39855	1.36063e-76
184253	ttr-21	mRNA	1.62061	5.31371e-36
3564833	C27D6.11	mRNA	-1.30273	3.65284e-26
176932	perm-4	mRNA	-3.49624	0
13194041	ZK616.61	mRNA	-1.06698	2.985e-12
3564768	ZK858.8	mRNA	-1.29658	2.88305e-26
189435	flh-3	mRNA	-2.96897	1.33325e-21
174531	wee-1.3	mRNA	-1.04963	4.56288e-138
185853	ceh-27	mRNA	1.03728	0.000327804
4926939	D2096.13	mRNA	-6.97728	0.000184031
187510	egg-2	mRNA	-2.18926	9.90563e-236
187509	R01H2.2	mRNA	-1.1426	1.9169e-11
181288	pxn-2	mRNA	1.21719	8.8633e-54
173639	Y110A2AR.1	mRNA	-1.10914	1.67378e-51
34700653	Y46C8AM.1	mRNA	1.62081	1.41798e-05
181451	R04D3.2	mRNA	-3.69786	4.17398e-38
181273	vap-2	mRNA	-2.80105	7.27701e-61
187184	cyp-14A2	mRNA	-1.80287	1.13059e-12
178770	slc-28.1	mRNA	-1.0288	1.45546e-05
13179121	Y48G1C.13	mRNA	-3.1219	3.02481e-11
171759	Y71G12A.4	mRNA	-1.05247	2.37536e-10
183954	D2062.4	mRNA	-1.04363	2.45527e-06
183182	nhr-163	mRNA	1.14345	0.000288266
6418859	K10C2.8	mRNA	-3.07936	3.15779e-50
13179322	Y48G8AL.16	mRNA	-1.9083	4.15182e-09
178809	phat-3	mRNA	1.18123	1.0336e-17
188904	bbs-8	mRNA	1.51824	6.2501e-06
185342	F36A4.5	mRNA	-3.16993	0.000632524
180499	Y75D11A.3	mRNA	-4.63227	1.27098e-12
186227	F54D1.1	mRNA	-1.00102	2.37057e-12
175624	F17C8.7	mRNA	-1.01387	7.68687e-25
173840	col-20	mRNA	-3.63422	0
178331	ule-4	mRNA	-2.62092	0
177722	Y73F4A.2	mRNA	1.09869	1.30277e-35
13184004	D2062.13	mRNA	-1	0.000172349
178766	C17B7.5	mRNA	2.35535	9.6582e-61
179865	dct-17	mRNA	1.50004	3.92175e-89
180269	Y43F8A.2	mRNA	-1.04923	9.5366e-70
181307	col-178	mRNA	-3.48185	0
188814	oac-48	mRNA	1.42701	1.70328e-05
173965	C25H3.10	mRNA	1.22642	1.34925e-12
13221694	K07E3.9	mRNA	-1.51575	6.72076e-22
181079	endu-2	mRNA	1.15066	1.17936e-226
173607	msrp-6	mRNA	-1.4882	6.37593e-26
178759	apx-1	mRNA	-1.14199	2.2409e-40
3565635	ubxn-5	mRNA	-1.44466	1.93211e-28
185739	F44E7.7	mRNA	1.15381	0.000411442
191293	ZK354.6	mRNA	-1.03994	1.42689e-14
189009	T28A11.2	mRNA	1.47438	1.26593e-68
180832	T22B7.7	mRNA	-2.01548	5.12444e-70
178138	T12G3.6	mRNA	-3.33977	4.57226e-146
174125	slc-36.5	mRNA	1.06769	2.51619e-09
173272	gpdh-1	mRNA	-2.02677	1.27335e-70
188025	srh-46	mRNA	3.97728	0.000178709
187528	R02F2.5	mRNA	-1.58496	1.3264e-08
172532	gld-1	mRNA	-1.29076	0
173883	F58A6.5	mRNA	-1.04314	5.53596e-13
175067	K09E4.1	mRNA	-1.30334	7.93779e-28
6418646	C05B5.11	mRNA	-3.89077	0.00076288
177865	gipc-2	mRNA	-1.39544	1.47099e-258
3565540	T28B8.6	mRNA	-1.09785	4.65759e-11
184002	E02H9.7	mRNA	-3.56408	9.44228e-08
4363132	C08A9.10	mRNA	-3.68079	2.15184e-52
174947	puf-6	mRNA	-1.83821	5.58936e-149
187507	R01E6.7	mRNA	1.23088	0.000215154
175016	Y54G9A.5	mRNA	-1.2451	1.63162e-50
187471	M88.3	mRNA	-1.05977	4.69159e-12
185067	F28E10.4	mRNA	-1.37333	7.8242e-09
184699	F19H6.4	mRNA	-3.22239	2.38565e-29
185664	F42C5.5	mRNA	-1.61844	8.5995e-19
171977	T20F5.4	mRNA	1.07848	7.02919e-20
171937	ipla-4	mRNA	-1.16297	5.78155e-20
191219	ZK84.5	mRNA	-1.63997	9.36682e-07
260065	ddn-1	mRNA	-1.65711	3.25646e-05
177619	vit-6	mRNA	-3.45976	0
186896	K02E11.5	mRNA	1.62843	3.39121e-15
266948	T01C1.4	mRNA	2.75327	4.59709e-05
178637	cnc-2	mRNA	8.42206	7.55622e-05
182686	C16D9.5	mRNA	-1.2389	3.6473e-09
186269	F54H12.5	mRNA	-1.67908	2.7559e-07
184745	F20G2.5	mRNA	1.4341	7.79396e-18
178246	F55G11.7	mRNA	2.28951	0.000685493
182517	C11E4.7	mRNA	-2.53482	9.69263e-44
187844	R12G8.1	mRNA	2.26708	2.92785e-19
189092	W01D2.3	mRNA	-1.42884	6.00938e-13
182325	C06E4.2	mRNA	1.69677	1.39634e-10
173201	T04D3.5	mRNA	-1.08161	5.96006e-09
185408	gst-12	mRNA	2.2034	1.73657e-13
13214665	ZK856.18	mRNA	-1.03165	5.12018e-11
180889	daf-9	mRNA	1.41195	3.864e-25
191712	msp-152	mRNA	-1.45519	9.55105e-175
181856	B0222.1	mRNA	1.07235	0.00017954
177655	mesp-1	mRNA	-2.33933	2.60485e-260
182859	C24H11.1	mRNA	-8.67596	1.00666e-37
174119	F31E8.5	mRNA	-1.08285	1.48346e-25
179269	mod-1	mRNA	1.04675	2.40004e-06
179806	odr-3	mRNA	1.15335	0.000344729
189021	T28A11.16	mRNA	1.7154	1.11662e-17
178355	Y37A1A.2	mRNA	1.10802	5.94957e-31
175865	Y42G9A.3	mRNA	1.0216	1.67968e-35
185619	F41E6.8	mRNA	1.77799	4.20013e-07
189146	oac-51	mRNA	3.27462	2.77822e-24
187960	T01G5.7	mRNA	-4.51937	4.17593e-17
3565034	glb-19	mRNA	1.04777	5.24246e-07
189477	Y18D10A.21	mRNA	-1.11147	1.69025e-07
171648	lpr-1	mRNA	1.23381	1.7715e-28
184702	F19H8.2	mRNA	1.6323	1.51582e-171
183505	C46E10.1	mRNA	-1.13815	3.82955e-16
181855	clec-52	mRNA	-1.23052	2.49097e-23
3565933	Y51A2D.21	mRNA	1.02785	9.83765e-08
185762	F44G4.6	mRNA	1.64973	2.74051e-07
178748	zmp-3	mRNA	1.01674	2.05887e-29
3896821	K11D12.13	mRNA	-3.49783	2.91124e-57
183570	C48B6.4	mRNA	-1.18363	2.41558e-21
178305	memi-2	mRNA	-1.45023	7.56277e-34
182456	C09F9.2	mRNA	1.18033	3.79073e-219
191066	ZC53.1	mRNA	-2.08153	7.59413e-09
184913	F25A2.1	mRNA	1.3806	6.82996e-07
3565709	B0361.11	mRNA	-1.09155	3.11228e-07
172494	col-7	mRNA	-2.60341	0
175111	F57C2.4	mRNA	-3.9785	7.53156e-51
13196550	C42D4.18	mRNA	1.2297	0.000507622
191809	srd-20	mRNA	1.71049	0.000265272
178244	C32H11.4	mRNA	2.15771	1.72934e-65
185396	F36H12.10	mRNA	-1.01681	6.84896e-20
173888	msp-49	mRNA	-1.49615	1.91579e-97
174469	C01G6.3	mRNA	-3.51425	2.39489e-118
3565537	F26D2.16	mRNA	-5.41504	9.31583e-12
190279	Y54G2A.13	mRNA	-1.05621	8.06626e-23
185407	gst-24	mRNA	1.77326	1.70114e-42
182083	C01G10.6	mRNA	1.48593	1.06771e-05
180877	C45B2.2	mRNA	1.23186	6.41247e-113
172947	F29C6.1	mRNA	1.00315	1.29878e-39
179207	C16D9.1	mRNA	2.74614	8.0664e-132
171848	W03D8.3	mRNA	-1.31631	5.07004e-07
178206	ZK795.2	mRNA	-1.01403	5.51674e-18
188688	ttr-23	mRNA	2.63689	3.53863e-50
181923	B0310.3	mRNA	1.2718	0.00010816
190195	Y53C10A.10	mRNA	-1.15131	3.12066e-29
178264	best-1	mRNA	1.51589	4.31145e-13
184423	F13E9.5	mRNA	-1.35315	7.9218e-11
184269	col-91	mRNA	-1.12084	7.52707e-241
178332	C08F11.10	mRNA	-1.08287	1.00736e-18
178800	C17E7.12	mRNA	-3.34756	6.33426e-12
174298	K02C4.2	mRNA	1.06088	7.39099e-05
182352	C07A4.3	mRNA	-2.15538	2.81758e-23
3565655	K04D7.6	mRNA	1.69116	9.058e-05
190182	clec-92	mRNA	-4.42626	1.09726e-05
181318	inx-2	mRNA	-1.3953	1.182e-08
183097	C31H1.5	mRNA	-1.26666	1.3657e-24
174574	ZK945.6	mRNA	-1.01817	1.6482e-05
177831	nspd-2	mRNA	-1.7617	2.64904e-57
179012	dmd-7	mRNA	2.34763	0
172607	col-63	mRNA	-1.48317	0
178172	Y39C12A.9	mRNA	1.25054	2.54147e-06
183134	dod-21	mRNA	3.51488	1.4353e-76
183811	nhx-3	mRNA	1.07847	2.49985e-48
6418737	F32D8.15	mRNA	1.1591	0.000585764
174325	F35C11.5	mRNA	-1.12529	1.08647e-36
172429	C30F12.4	mRNA	-1.36311	2.15476e-62
172387	T23B3.5	mRNA	-1.10105	1.46458e-57
173728	F54D10.7	mRNA	-4.59323	5.45881e-35
189005	T27F6.8	mRNA	1.08793	6.14375e-13
179009	W06H8.2	mRNA	1.52763	7.30704e-07
173711	F19B10.2	mRNA	-2.95217	8.66999e-10
186663	H01M10.1	mRNA	1.51394	1.57422e-10
6418851	F46C3.6	mRNA	3.88906	0.000608541
175997	B0280.11	mRNA	-1.23022	1.23097e-14
182494	npr-3	mRNA	1.05733	0.000709978
173884	msp-45	mRNA	-1.57206	3.68534e-256
175708	pup-2	mRNA	-1.28427	6.3271e-125
178689	clec-208	mRNA	-2.37037	1.23221e-05
177781	wrt-3	mRNA	1.00553	2.3932e-06
174617	F59B10.6	mRNA	1.11979	0.000119956
180765	ifa-4	mRNA	-1.34602	7.28321e-152
179782	lin-46	mRNA	2.08017	1.41441e-21
179294	F21C10.3	mRNA	1.14945	6.58595e-08
3565772	D1022.9	mRNA	-1.10359	1.57993e-11
176549	tbx-34	mRNA	-1.07426	2.85075e-21
177278	rmd-6	mRNA	-1.00154	6.52625e-13
173825	msp-3	mRNA	-1.65685	1.24038e-135
185389	F36H9.2	mRNA	-1.52195	2.22308e-08
188711	T22A3.6	mRNA	-1.18587	0.00015034
186181	F53F8.4	mRNA	1.14569	6.50339e-35
187697	clec-175	mRNA	-1.79355	3.9917e-14
183168	C33F10.12	mRNA	-1.04705	2.12768e-29
27219614	C30B5.17	mRNA	-1.29687	1.75181e-05
190929	Y106G6H.13	mRNA	-1.12848	4.8012e-32
172179	spe-11	mRNA	-1.34983	7.54036e-65
177992	Y69E1A.2	mRNA	-1.49711	3.43602e-175
179001	ceh-49	mRNA	-3.16993	3.13331e-18
186488	nas-29	mRNA	1.77111	3.56599e-23
174222	rnh-1.1	mRNA	-1.06912	3.13992e-24
176998	Y76B12C.4	mRNA	-1.3557	1.16403e-14
3896863	Y5H2A.4	mRNA	-1.6368	6.51281e-10
191447	ZK892.6	mRNA	-3.28204	0.000204256
182934	C26C6.6	mRNA	-1.76623	0.000178141
171729	Y71G12B.18	mRNA	-4.32769	6.54883e-29
188353	T10B5.8	mRNA	-1.23786	9.94675e-06
182232	ttbk-5	mRNA	-1.27962	1.13664e-21
173604	K02F6.7	mRNA	-1.65529	5.52326e-40
3896848	R09E12.9	mRNA	2.05148	2.63119e-20
178389	Y57G11A.2	mRNA	-1.33668	1.97771e-228
183358	C40C9.3	mRNA	-2.72437	9.84078e-19
178659	hsp-16.2	mRNA	2.4767	6.50346e-149
179065	ZC487.1	mRNA	1.00637	0.00041381
182024	B0524.2	mRNA	-1.71839	1.20322e-07
190676	Y73F8A.14	mRNA	-1.31411	9.95468e-08
172229	ptr-10	mRNA	1.498	2.21888e-54
172364	T10E9.3	mRNA	-1.74433	0
175336	F53A3.1	mRNA	1.44908	1.18569e-06
172885	clec-87	mRNA	-2.52668	0
176412	C05B5.2	mRNA	-1.15378	4.12213e-35
186275	F55A4.7	mRNA	1.59192	0.00054134
180096	oac-7	mRNA	2.31703	1.72846e-22
6418867	F23D12.10	mRNA	-2.89308	9.10921e-05
13179502	peel-1	mRNA	-1.02155	0.000559497
3565250	F36A2.14	mRNA	-1.01192	3.07217e-19
181986	B0416.7	mRNA	1.38094	9.0663e-09
172386	C17F3.1	mRNA	-1.45179	4.88532e-23
171847	W03D8.5	mRNA	-1.41895	7.0188e-11
178351	B0513.4	mRNA	-3.25237	3.15916e-186
181034	vit-1	mRNA	-2.87808	0
3565371	C40H1.8	mRNA	1.0725	2.24046e-62
177269	ssq-4	mRNA	-1.66382	1.78599e-295
185513	nep-15	mRNA	-1.02099	7.39847e-06
4927009	ule-2	mRNA	-2.61545	1.06278e-188
175580	C28A5.1	mRNA	-1.0918	6.57181e-43
177265	ssq-2	mRNA	-1.58179	1.56793e-304
173480	F45D11.16	mRNA	5.90689	1.7694e-07
191742	pes-8	mRNA	-1.31275	2.37904e-151
3565598	F11A5.15	mRNA	3.30117	0.000153459
179559	cln-3.1	mRNA	1.06542	1.30741e-28
186217	F54B11.10	mRNA	1.74338	4.97359e-08
182799	C18G1.9	mRNA	-1.92128	1.11292e-32
177815	cav-1	mRNA	-2.76167	5.61616e-11
174143	C15F1.2	mRNA	1.16778	6.86251e-92
187480	M151.3	mRNA	-3.81669	1.11253e-12
191964	ssq-3	mRNA	-1.53484	6.60182e-73
176117	col-90	mRNA	2.3808	0
189366	Y6B3B.1	mRNA	-1.32193	4.2983e-08
179755	ugt-6	mRNA	-1.83866	8.39787e-83
172465	cpg-3	mRNA	-3.07781	0
190149	col-137	mRNA	-2.91737	0
3564871	C51E3.10	mRNA	1.41332	5.02497e-08
190493	tbx-33	mRNA	-2.58496	1.99639e-08
172007	egg-5	mRNA	-1.93953	5.20342e-279
184205	ugt-65	mRNA	1.37675	4.72556e-39
184311	clec-153	mRNA	-1.23457	1.56427e-20
188361	cyp-13A1	mRNA	1.8365	0.000560651
174614	myrf-1	mRNA	1.15184	4.12438e-293
185212	col-152	mRNA	-2.9829	2.45388e-118
183291	C37C3.11	mRNA	3.0635	3.70418e-05
185498	F39F10.3	mRNA	-1.91254	2.04115e-05
173034	K08C9.1	mRNA	-1.34948	7.96487e-16
189563	comt-2	mRNA	3.10597	4.10096e-11
13184191	Y25C1A.14	mRNA	-2.03242	0.00022446
184622	lys-10	mRNA	-3.26167	1.49461e-07
13181858	F59C6.18	mRNA	1.86426	5.00504e-10
188809	nas-27	mRNA	-1.31145	6.798e-39
266877	spsb-2	mRNA	-2.37623	1.35642e-56
174613	clec-61	mRNA	-1.86876	2.30057e-11
192081	unc-42	mRNA	1.13245	0.000126504
183133	C32H11.9	mRNA	9.48985	2.67181e-64
171960	gsp-4	mRNA	-1.2327	1.67828e-84
180205	hmit-1.1	mRNA	-2.24462	2.02832e-93
173747	R11F4.1	mRNA	2.13243	0
185175	F31F6.1	mRNA	-2.53492	1.27141e-11
24104914	T21D12.7	mRNA	1.09516	1.9744e-05
188184	fbxa-135	mRNA	2.42626	0.000662873
175607	mab-21	mRNA	1.57998	1.09551e-26
172383	ZC581.3	mRNA	-1.13628	7.64629e-38
24104698	cdr-7	mRNA	1.78706	8.846e-67
172685	C36B1.11	mRNA	-1.06498	4.11456e-45
191455	tba-8	mRNA	3.74097	6.19178e-56
189140	grl-22	mRNA	-1.08658	4.20598e-07
181847	cyp-34A5	mRNA	1.76005	0.000101192
3565611	Y59E9AL.2	mRNA	-1.70663	2.6236e-179
13222115	C25A11.10	pseudo	-1.05978	0.000597445
3564843	C30G7.4	mRNA	-3.1014	1.47389e-12
175029	his-11	mRNA	1.18525	0.000847129
177166	C35B1.4	mRNA	-2.95592	6.39463e-194
183934	D1086.7	mRNA	-2.92934	9.65652e-173
177866	msd-3	mRNA	-1.87871	8.16998e-69
178811	phat-5	mRNA	2.62091	4.03061e-39
189075	cutl-6	mRNA	1.09592	1.97407e-05
181838	B0207.9	mRNA	-1.16262	1.33287e-06
184285	F10B5.3	mRNA	2.00589	7.79493e-71
3896857	Y39H10B.2	mRNA	-1.12891	6.60147e-19
174312	tub-1	mRNA	1.04731	0.000561464
188643	T20D4.7	mRNA	3.21045	1.56596e-07
173033	nhr-113	mRNA	2.05382	8.91338e-38
174732	rmd-3	mRNA	-1.04156	1.89118e-23
178333	C08F11.12	mRNA	-2.42461	6.33726e-08
181453	R04D3.3	mRNA	-3.69923	6.50181e-170
6418659	T12B5.15	mRNA	-2.53779	1.42591e-17
3565719	W10C8.6	mRNA	2.25835	3.00208e-06
180071	T10C6.10	mRNA	-2.69738	7.35507e-19
179803	col-159	mRNA	-1.21883	0
178054	F54E12.2	mRNA	-1.25588	2.32543e-256
181059	C34D10.2	mRNA	1.07282	4.35665e-56
177447	C17H12.8	mRNA	2.33406	0
171992	acd-2	mRNA	-1.73321	1.23955e-13
188648	T20D4.12	mRNA	2.39759	1.21173e-14
182541	fipr-8	mRNA	1.35651	1.39834e-07
185395	F36H12.5	mRNA	-1.41989	1.27385e-25
181513	C04C11.1	mRNA	-1.63668	7.35765e-09
185826	scrm-6	mRNA	-1.16434	1.47119e-13
182276	nhr-76	mRNA	-1.00819	6.55502e-14
179296	col-144	mRNA	1.3311	0
172952	lam-3	mRNA	1.32532	4.17556e-99
188362	cyp-13A7	mRNA	1.72583	1.18326e-05
190458	aptf-2	mRNA	-2.59495	7.99296e-32
176899	kvs-5	mRNA	1.29329	1.17801e-86
178635	cnc-4	mRNA	1.5838	0.000107015
183023	C29F9.6	mRNA	2.02308	1.25772e-18
178065	cyp-31A2	mRNA	-1.09791	1.24841e-60
187696	R08C7.4	mRNA	6.20945	1.17744e-08
179239	F25G6.1	mRNA	1.30684	3.52396e-12
172211	cey-3	mRNA	-1.23596	0
178660	hsp-16.41	mRNA	2.34985	3.97677e-134
191665	gur-5	mRNA	-2.98489	4.38851e-06
173928	F07F6.1	mRNA	-1.01817	6.8462e-20
181861	B0228.1	mRNA	1.19992	4.94208e-17
178888	F26G5.1	mRNA	-3.46877	3.15846e-56
189082	W01B6.5	mRNA	-1.41741	2.36526e-12
185101	ocr-1	mRNA	1.40808	0.000478968
182028	scl-23	mRNA	-1.09516	2.0217e-09
24104251	C25G4.17	mRNA	4.93748	1.65219e-15
178910	C52A10.2	mRNA	-1.49369	1.60138e-08
176407	gln-2	mRNA	-1.00933	2.86772e-40
174461	sym-2	mRNA	1.08612	4.60735e-168
175170	col-88	mRNA	-2.8104	0
175516	glb-11	mRNA	1.29452	1.39111e-13
259701	ets-10	mRNA	-2.26983	8.68875e-14
13191191	Y39A1A.27	mRNA	7.91289	0.000284286
172559	F55D12.6	mRNA	-1.2407	6.24318e-13
183952	D2045.5	mRNA	-1.11832	2.72654e-07
182503	C10G8.4	mRNA	-3.56838	6.75396e-54
182330	glb-2	mRNA	1.93357	0.000226881
185226	col-54	mRNA	2.99251	0
187919	mpst-7	mRNA	1.36402	1.46663e-45
177263	E03H12.7	mRNA	-1.15839	1.40721e-17
188141	T05G5.4	mRNA	-1.21647	0.000531312
189178	W04A4.2	mRNA	-2.3527	1.38962e-52
178270	F58D2.2	mRNA	-1.02382	3.4872e-42
172316	C48E7.7	mRNA	-1.91116	3.83062e-200
182485	C10A4.4	mRNA	-3.15815	3.51847e-10
182293	C06B3.6	mRNA	1.21477	1.227e-37
182982	C28D4.7	mRNA	-1.42777	1.87734e-35
172796	K07A1.5	mRNA	-1.45911	1.53744e-35
190395	Y59A8B.12	mRNA	-1.53668	8.299e-32
181834	B0207.1	mRNA	-1.08684	2.00496e-12
178805	nlp-29	mRNA	1.08898	2.66683e-14
176405	K03H1.9	mRNA	-1.32275	2.10065e-06
178797	R08F11.4	mRNA	1.66131	5.32142e-28
186382	F56D5.3	mRNA	1.70004	3.48429e-29
180128	F09C6.1	mRNA	4.18322	5.1764e-05
173872	ify-1	mRNA	-1.10151	6.8667e-87
178917	B0238.9	mRNA	-1.17576	2.54942e-75
172804	T05F1.2	mRNA	-2.06895	8.40741e-283
189908	Y45F3A.4	mRNA	1.33276	1.07285e-28
173979	acdh-8	mRNA	-1.14267	5.81436e-48
178390	T27E7.1	mRNA	-1.32718	1.39459e-89
175498	maph-1.3	mRNA	-1.05264	8.47677e-118
174907	cnp-2	mRNA	-1.94619	0
188348	T09F5.10	mRNA	-1.11477	2.43703e-09
172415	smz-2	mRNA	-1.60746	7.07447e-73
189083	W01B6.6	mRNA	-1.35954	5.25082e-13
190659	clec-210	mRNA	2.88498	1.12237e-76
190173	Y51H7C.1	mRNA	-1.66914	0
177275	msp-53	mRNA	-1.83982	0
185978	nlp-3	mRNA	1.04352	1.05155e-05
3565564	C10H11.7	mRNA	-1.27793	3.4187e-11
180239	Y39B6A.42	mRNA	-1.01691	2.29146e-18
180815	pks-1	mRNA	-1.19931	4.601e-19
178296	mex-5	mRNA	-1.92654	0
181658	gpn-1	mRNA	1.21805	3.87928e-16
191276	ZK265.3	mRNA	-1.38975	1.01961e-63
180957	C53B7.3	mRNA	1.51225	3.83604e-155
28661643	C49G7.7	mRNA	1.44815	0.000449662
185932	F47D12.3	mRNA	1.10674	0.00078105
181081	cutl-29	mRNA	1.12766	5.68832e-09
184695	abu-2	mRNA	-2.43857	2.60927e-07
175333	B0524.5	mRNA	-1.69515	4.57198e-07
24104675	vit-3	mRNA	-3.53041	0
172740	F25H5.7	mRNA	-1.07386	5.53302e-10
189837	gbb-1	mRNA	1.25002	7.25045e-19
186254	F54F7.6	mRNA	-1.93618	8.00473e-06
353458	abu-4	mRNA	-1.68044	1.31133e-14
184143	fbxb-36	pseudo	-1.07276	0.000376932
172871	B0379.7	mRNA	-1.31139	5.3207e-60
185456	F38B7.2	mRNA	1.51912	6.62952e-49
173476	fbxc-32	mRNA	-3.5319	2.8357e-23
173885	F58A6.9	mRNA	-1.12888	1.87494e-08
183997	E02H4.6	mRNA	-4.09003	2.9336e-30
190592	Y71F9B.15	mRNA	-1.60334	5.73745e-12
178505	gln-5	mRNA	-2.15845	2.69529e-239
183897	D1014.6	mRNA	-1.54934	7.99652e-08
171606	spe-8	mRNA	-1.04302	3.32229e-16
259631	ttr-33	mRNA	1.16927	4.81256e-23
181363	Y62H9A.3	mRNA	-3.44314	2.55343e-175
182608	C14C10.1	mRNA	-1.39376	2.93016e-59
185047	aptf-3	mRNA	-1.33051	5.41583e-57
172400	acdh-5	mRNA	-1.01842	7.0571e-14
188845	T24C4.4	mRNA	1.92636	1.3098e-28
183435	C44B9.3	mRNA	-1.63633	1.05448e-34
171679	hmbx-1	mRNA	1.04803	1.71585e-17
179717	F45D3.3	mRNA	1.08581	4.11933e-77
181452	R04D3.4	mRNA	-4.0338	9.90074e-19
181590	rgs-11	mRNA	-2.67119	3.53544e-10
172083	W09C3.7	mRNA	-1.429	5.75381e-31
176933	perm-2	mRNA	-3.49306	0
246002	Y37F4.5	mRNA	-1.50589	1.24152e-11
6418817	ZC250.5	mRNA	-1.1288	2.00331e-07
175805	B0244.9	mRNA	-1.49906	4.17094e-10
187764	R10D12.7	mRNA	2.13947	5.78285e-05
178101	inx-8	mRNA	-1.37367	3.91439e-58
3564809	egas-4	mRNA	1.80735	0.000871612
174133	B0252.1	mRNA	1.24684	2.6504e-36
353431	T04B2.7	mRNA	-1.39374	6.05337e-08
180661	nlp-1	mRNA	1.01355	4.32031e-08
259720	tsp-21	mRNA	1.19236	6.33024e-18
180963	pes-23	mRNA	-3.32577	3.40122e-60
172964	C34B2.3	mRNA	-1.32855	3.74504e-15
171625	Y48G1A.2	mRNA	-1.48445	8.65605e-15
3565754	C48B4.13	mRNA	1.28129	1.37493e-07
184896	F23D12.3	mRNA	-1.55234	8.17159e-12
184201	F08G2.5	mRNA	1.69891	1.28171e-51
174504	mex-6	mRNA	-2.17075	0
174626	C06A1.3	mRNA	-1.13803	9.3411e-23
182176	cyp-35A1	mRNA	-1.5115	8.45193e-05
173822	C27D9.1	mRNA	-1.69963	7.571e-79
174273	perm-1	mRNA	-1.64872	4.42107e-118
182441	C09B9.1	mRNA	2.17754	0.000416547
187492	ztf-14	mRNA	1.43962	5.9941e-07
175358	strm-1	mRNA	1.28613	4.91443e-25
182602	nhr-155	mRNA	3.46489	1.02868e-30
184442	F13H10.5	mRNA	1.16306	1.59608e-05
184522	far-5	mRNA	1.21225	9.54673e-22
186253	F54F7.2	mRNA	-1.65521	8.58165e-12
184094	F02E9.3	mRNA	-1.64008	8.04803e-28
172198	F27C1.1	mRNA	-1.59559	2.14185e-172
186175	F53F4.2	mRNA	3.89308	6.81301e-07
186372	acbp-4	mRNA	-1.88718	3.18524e-05
174578	gpd-4	mRNA	-1.05801	3.39732e-113
172213	klp-15	mRNA	-1.5599	4.02798e-197
178838	Y47D7A.2	mRNA	-7.15987	0.000672496
179081	lipl-6	mRNA	1.25924	7.84505e-39
182351	C07A4.2	mRNA	1.43082	1.96797e-08
187126	K07H8.5	mRNA	-1.00186	2.19287e-08
259801	msp-113	mRNA	-1.51042	0
182575	ncx-8	mRNA	1.48158	3.93793e-22
172107	F21F3.2	mRNA	-1.34308	8.7243e-20
179368	F58E6.5	mRNA	-1.57439	8.22181e-60
178009	M7.9	mRNA	-4.42206	1.03554e-10
188639	T20D4.3	mRNA	2.55605	1.69305e-60
190486	Y65B4A.7	mRNA	-1.54928	0.000351441
181183	dyf-7	mRNA	-1.43134	1.7917e-11
181465	fkh-3	mRNA	-4.00817	2.25652e-14
178197	smz-1	mRNA	-1.28336	1.59908e-86
175222	C09F5.1	mRNA	1.28011	2.13482e-57
172614	F52B5.2	mRNA	-1.12899	1.59732e-56
178225	C27D8.2	mRNA	-1.13429	1.04904e-45
3564788	nlp-41	mRNA	1.4718	6.14954e-05
259685	F48F5.6	mRNA	1.33216	3.49981e-13
183497	C46A5.1	mRNA	-1.58496	9.86009e-16
189089	W01C9.2	mRNA	2.1952	3.12888e-45
190131	Y51A2B.6	mRNA	-2.34104	7.15958e-07
177994	cyb-2.1	mRNA	-1.91485	3.4268e-115
190893	Y105C5B.11	mRNA	-1.16227	1.8052e-08
184102	F02H6.2	mRNA	-3.1964	2.08283e-54
172082	gsp-3	mRNA	-1.10957	2.24336e-79
173834	C33F10.1	mRNA	-1.29652	9.54729e-62
186883	K02E2.8	mRNA	1.53929	1.62276e-38
180211	ttr-26	mRNA	1.32112	4.84717e-56
178784	F59B1.8	mRNA	1.15339	1.36422e-56
181112	F18E9.3	mRNA	2.01672	2.0814e-110
176592	Y66D12A.3	mRNA	-1.33577	1.94238e-18
183081	C31B8.12	mRNA	-1.88691	1.80537e-07
183860	abcx-1	mRNA	1.55522	2.209e-07
178327	C08F11.13	mRNA	1.23037	1.16117e-32
189309	W09C3.1	mRNA	-2.15815	5.74596e-16
178033	C05C12.5	mRNA	-1.2669	2.09583e-14
174444	T24B8.3	mRNA	1.2168	9.60508e-22
6418603	T27C10.8	mRNA	-1.31542	3.58957e-11
179777	grl-2	mRNA	1.05161	9.99924e-05
189294	W08E12.6	mRNA	1.46949	2.04865e-12
176663	pph-4.2	mRNA	-1.04266	1.88556e-34
3565147	cnc-10	mRNA	1.11364	5.54715e-11
178210	let-99	mRNA	-1.22003	9.22063e-103
187968	dma-1	mRNA	1.09495	9.33253e-08
187144	K08D8.4	mRNA	1.27855	1.81712e-60
187981	T02B11.4	mRNA	-1.50351	1.87704e-18
4363051	B0280.17	mRNA	-1.14945	4.56705e-52
185275	F35C12.3	mRNA	1.0499	1.37902e-25
190738	clp-6	mRNA	-1.04	8.67991e-22
171929	inx-22	mRNA	-1.1949	2.9989e-70
174642	M28.9	mRNA	-1.24718	7.92025e-47
260217	Y105E8A.13	mRNA	1.04749	2.35029e-19
187071	K06H6.2	mRNA	-3.70044	3.4572e-06
176750	klp-19	mRNA	-1.02777	7.83486e-200
181296	lpr-6	mRNA	1.33454	2.52696e-256
189654	clec-4	mRNA	1.54067	2.69457e-103
3565867	C33C12.10	mRNA	1.05584	1.45972e-08
180593	rsef-1	mRNA	-1.23758	2.38393e-06
189661	nspe-7	mRNA	1.73762	8.51226e-10
179464	ugt-33	mRNA	1.23084	1.89903e-12
183175	drd-10	mRNA	-2.36587	1.72691e-07
177464	cht-3	mRNA	-3.17064	0
178595	nas-32	mRNA	1.09657	1.58457e-07
179903	D1086.11	mRNA	-2.7757	6.97941e-247
185257	F35B3.7	mRNA	1.0749	2.06636e-14
171644	Y65B4BL.1	mRNA	1.11621	2.23514e-08
185428	comp-1	mRNA	-1.2713	2.86318e-20
179570	npr-25	mRNA	1	0.000707653
186361	fbxa-190	mRNA	1.23644	9.9548e-08
188770	abf-5	mRNA	1.72837	1.46376e-29
173830	msp-40	mRNA	-1.46026	0
179405	R04B5.5	mRNA	1.1556	5.61382e-28
173981	msp-142	mRNA	-1.35437	3.06257e-108
186667	H02F09.3	mRNA	2.07442	4.11246e-43
180077	F14H3.6	mRNA	-3.25457	1.31206e-208
189951	Y46D2A.1	mRNA	1.57061	3.77987e-07
183290	C37C3.10	mRNA	1.87283	6.5604e-06
6418842	F07G6.10	mRNA	-2.70501	1.27373e-70
187292	srr-4	mRNA	1.24139	2.61234e-137
3565137	C35E7.11	mRNA	1.69175	1.04936e-07
190739	Y79H2A.2	mRNA	-1.51264	7.48609e-28
173835	nspd-4	mRNA	-1.29266	3.61819e-12
174349	F22B5.5	mRNA	-1.15214	1.34589e-15
188416	T11F8.1	mRNA	-1.73965	1.23992e-13
182846	C24D10.5	mRNA	-2.29177	0.000570911
178801	C17E7.4	mRNA	-3.5737	2.42039e-52
177180	scrm-5	mRNA	-1.23435	1.99503e-19
173678	bath-30	mRNA	-1.14449	4.8312e-35
178736	C24B9.3	mRNA	-1.26847	2.71106e-159
183909	D1046.4	mRNA	-1.04818	3.47572e-11
173978	lect-2	mRNA	1.04955	9.09305e-24
191362	ZK616.8	mRNA	-1.18021	1.61921e-08
191225	ZK105.6	mRNA	1.25468	0.000850711
188722	T22B3.3	mRNA	-1.64576	3.78556e-65
178215	pgp-1	mRNA	1.49606	0
177759	F49C12.15	mRNA	-1.01525	2.64163e-118
179974	ssp-33	mRNA	-1.88405	7.62436e-06
180197	ZK262.2	mRNA	1.52356	5.14989e-09
175076	ace-3	mRNA	1.16074	1.71386e-08
190544	Y69A2AR.23	mRNA	-1.04189	4.44947e-07
186063	mul-1	mRNA	1.60946	4.0118e-15
187241	K09H9.5	mRNA	1.92592	5.02269e-46
183464	C44H9.5	mRNA	1.09927	4.70441e-16
186492	dsl-5	mRNA	6.96578	3.02766e-09
183961	2020-03-02	mRNA	-1.7885	5.35659e-09
179073	col-143	mRNA	-3.87135	0
187244	K09H11.4	mRNA	-2.2864	2.01219e-47
178114	M117.4	mRNA	-1.29248	1.77334e-30
178653	Y46H3C.5	mRNA	-1.51403	0.000232404
191027	Y119C1B.3	mRNA	1.04836	4.92084e-05
173710	sea-1	mRNA	-4.80735	2.94272e-21
4363020	F59A6.12	mRNA	-3.73456	2.91613e-22
172361	glh-2	mRNA	-1.08677	2.67891e-117
183552	C47E8.3	mRNA	1.15368	2.20672e-05
173684	nep-10	mRNA	-1.95374	1.04962e-24
191443	ZK858.2	mRNA	-1.86434	2.17465e-65
185709	msra-1	mRNA	1.02369	0
3565015	F26D10.13	mRNA	-7.15987	9.61429e-05
178383	F55B11.3	mRNA	-3.70362	5.90203e-200
177082	lin-22	mRNA	2.37046	1.48426e-07
3565966	C05D12.7	mRNA	1.1193	0.000143066
184335	oac-15	mRNA	1.95777	4.31364e-12
3896725	B0252.8	mRNA	1.16056	0.000106251
172863	fog-3	mRNA	1.64809	1.35547e-41
182013	B0507.6	mRNA	-2.56768	8.18385e-08
174453	C16D2.1	mRNA	-1.11393	5.44308e-06
179560	clec-222	mRNA	-4.58496	3.16743e-06
188642	arrd-22	mRNA	1.39473	4.35915e-50
172475	F13G3.3	mRNA	1.12121	9.64056e-12
6418636	W02B12.13	mRNA	-1.14798	8.32159e-07
189838	Y41G9A.5	mRNA	1.8088	1.8689e-77
189470	memi-1	mRNA	-1.17758	1.78077e-35
3565525	mltn-5	mRNA	2.5502	8.20141e-08
182243	C05A9.2	mRNA	1.31897	1.01073e-18
182945	C26G2.2	mRNA	-2.67688	5.02701e-82
259559	Y94H6A.10	mRNA	1.21469	0
173583	K09F6.3	mRNA	-1.3662	8.39853e-66
178129	hdl-1	mRNA	-1.65688	6.23639e-30
171947	C32E8.4	mRNA	-1.24442	6.71535e-05
186563	F59A1.11	mRNA	2.51937	0.000662963
177715	col-119	mRNA	-3.65719	0
180581	nmy-1	mRNA	-1.20784	0
181801	pqn-2	mRNA	-1.50399	2.66278e-200
187490	M162.7	mRNA	-1.34792	2.75888e-18
181936	B0348.2	mRNA	2.58496	0.000231244
191735	nos-1	mRNA	-1.17182	4.62933e-21
171745	Y71G12B.27	mRNA	-1.0525	3.9629e-11
177389	sams-5	mRNA	-1.05516	3.44214e-54
189171	W03G9.5	mRNA	-1.30415	1.81717e-06
172170	C01G8.1	mRNA	-2.24541	1.67012e-240
190916	Y106G6D.3	mRNA	-1.41376	1.34446e-57
181184	F15G9.1	mRNA	-1.64421	0
177454	T22D1.5	mRNA	-1.8155	8.07204e-189
180729	amt-1	mRNA	-1.47854	3.28619e-07
173089	clp-3	mRNA	-1.29211	6.60331e-16
172489	F07A5.2	mRNA	-1.1267	8.9672e-79
176308	fozi-1	mRNA	1.06351	1.61545e-48
189664	nhr-235	mRNA	2.63691	3.54486e-16
179904	D1086.6	mRNA	-3.0009	8.26916e-188
172572	T22C1.9	mRNA	-1.38406	3.06102e-14
183324	C39B5.5	mRNA	-2.0653	3.1741e-221
3565656	Y47D3B.4	mRNA	1.52143	3.3476e-13
179049	hcp-1	mRNA	-1.15712	7.61304e-250
183834	sdz-8	mRNA	1.281	5.48205e-11
179287	hsp-16.48	mRNA	1.62383	1.34862e-167
191446	ZK892.5	mRNA	-1.00575	3.46084e-10
182978	C28C12.4	mRNA	1.54487	4.65189e-111
6418827	H29C22.1	mRNA	-1.92147	7.52048e-07
175535	hrde-1	mRNA	-1.08827	0
173126	W02D9.7	mRNA	-3.7968	4.97063e-155
4927026	H38K22.7	mRNA	-1.19883	2.65585e-05
177267	pes-1	mRNA	-4.05889	2.03351e-05
185998	F48G7.10	mRNA	1.97109	2.31718e-07
3565105	Y41E3.18	mRNA	-1.2783	6.87205e-06
177304	ttbk-2	mRNA	-1.13855	1.28079e-22
189624	Y37E11B.2	mRNA	1.8016	1.02191e-07
177805	K01H12.4	mRNA	-1.64937	1.35928e-61
177506	ocr-4	mRNA	1.54432	8.30095e-06
177255	mpz-4	mRNA	-1.19027	1.2683e-21
182037	dod-20	mRNA	1.27922	5.45646e-05
173531	bath-26	mRNA	-1.28293	5.41223e-05
177271	C09B9.4	mRNA	-1.17358	1.06517e-22
191207	ZK6.6	mRNA	1.15155	2.97815e-27
174522	cyp-13A10	mRNA	1.18442	3.82125e-05
180954	F41B4.3	mRNA	1.05137	5.42243e-07
191680	his-38	mRNA	-2.64284	0.000189425
179812	col-161	mRNA	-1.24556	0
173541	ceh-83	mRNA	-1.77259	1.33099e-15
186051	F49E11.7	mRNA	-1.40704	1.90667e-10
181121	asns-2	mRNA	1.6535	0
184231	fbxa-44	mRNA	1.96683	2.00485e-05
180090	F21H7.5	mRNA	-1.67791	7.50685e-144
182576	ncx-9	mRNA	2.14505	3.65933e-08
189919	Y45F10B.9	mRNA	-7.05528	1.34091e-07
175482	F34D10.8	mRNA	-1.44739	0.000138133
180288	Y43F8C.9	mRNA	-1.14996	1.14996e-15
189242	W06D11.1	mRNA	-1.24826	3.22719e-06
185378	F36G9.15	mRNA	-4.02748	0.000420215
172106	icmt-1	mRNA	-1.64576	2.5073e-20
187013	K04H4.5	mRNA	-1.24548	1.66804e-54
173611	F22E5.17	mRNA	-1.93305	3.11985e-19
177874	msp-36	mRNA	-1.39099	1.32845e-218
3565619	grd-13	mRNA	1.98693	1.18213e-156
174258	glr-4	mRNA	1.26031	6.07978e-19
187627	R05G9.3	mRNA	-3.65992	2.77654e-23
174771	F54D5.5	mRNA	-1.36796	3.15134e-23
259609	F11E6.11	mRNA	2.49683	1.05442e-11
176884	F56A11.6	mRNA	-1.20715	9.22471e-39
183292	C37E2.2	mRNA	1.47911	2.58503e-10
175383	zmp-2	mRNA	1.21127	1.84656e-46
13215998	T16G1.13	mRNA	-1.27198	1.57027e-05
178437	tag-349	mRNA	-1.11193	1.58676e-63
175374	Y54F10AM.11	mRNA	-2.23612	1.58932e-31
180853	ctbp-1	mRNA	1.17996	4.31419e-13
173627	K12H6.9	mRNA	-4.26849	3.75578e-05
186237	F54D11.3	pseudo	-1.89862	1.2498e-05
179869	cld-9	mRNA	1.36098	2.12756e-105
179291	pqn-31	mRNA	1.1883	4.66132e-106
3564889	nspc-2	mRNA	-1.44881	4.50226e-18
180830	T21F4.1	mRNA	1.87758	0
174043	C32D5.4	mRNA	-1.18881	1.10803e-15
177826	kin-21	mRNA	-1.07643	1.52236e-08
176900	gst-40	mRNA	1.14272	7.30416e-05
186995	K04F1.9	mRNA	1.01917	3.84254e-08
184299	F10D11.4	mRNA	-1.10768	0.000383982
3566000	nspc-6	mRNA	-1.44881	4.50393e-18
178843	T08H10.3	mRNA	-1.44308	4.34305e-17
3896827	F41E6.15	mRNA	-2.09722	1.13359e-10
179061	era-1	mRNA	-2.48597	0
188105	T05B4.9	mRNA	5.7866	2.09144e-29
173088	F58D5.3	mRNA	1.36528	0.000692503
172120	paf-1	mRNA	-1.65281	5.53274e-08
259653	fipr-1	mRNA	1.60806	1.39711e-11
4926899	nspd-6	mRNA	-1.13466	2.00454e-16
190760	fbxa-79	mRNA	1.15406	7.17732e-09
3565159	oac-8	mRNA	-1.43296	0.000716517
184037	cut-4	mRNA	-1.08937	2.66266e-49
177375	M03D4.4	mRNA	1.46133	1.63077e-28
172760	lin-41	mRNA	-1.19651	6.87742e-187
191182	ZC477.7	mRNA	-1.34156	1.11502e-37
179619	col-158	mRNA	2.52124	1.93866e-18
3896773	F56D6.13	mRNA	-1.71244	3.46097e-10
174170	F10E7.11	mRNA	-1.07465	4.34304e-09
187971	lgc-13	mRNA	-2.56884	7.67414e-05
13185579	C04A2.15	mRNA	7.94837	3.88388e-05
174108	T14B4.5	mRNA	1.70044	3.75892e-25
181362	mes-1	mRNA	-1.84461	2.30405e-20
186749	H17B01.2	mRNA	-1.80915	8.79748e-127
178027	sdz-27	mRNA	-1.95594	1.18485e-66
190505	oac-56	mRNA	1.43686	6.6985e-05
171980	egg-4	mRNA	-1.87948	2.22047e-221
182505	C10G11.1	mRNA	-1.38448	9.4029e-06
177272	msp-55	mRNA	-1.7266	1.15379e-147
191507	ZK1053.2	mRNA	-1.04824	2.22559e-33
176803	flp-15	mRNA	1.4344	3.93459e-05
182121	C02F5.2	mRNA	-1.50345	5.86094e-09
187771	R10E4.6	mRNA	-2.29546	5.40714e-05
178035	nhr-7	mRNA	1.55837	4.08431e-36
183273	fbxa-170	mRNA	-3.152	7.42768e-15
3565316	ZK822.6	mRNA	1.25652	0.000850596
4927049	F07C6.6	mRNA	2.07363	1.30529e-05
183722	col-138	mRNA	-1.59311	0
177117	osm-9	mRNA	1.22239	1.4058e-05
183835	C55A6.6	mRNA	1.01904	2.53153e-07
175518	pxd-1	mRNA	1.09299	3.73644e-30
185301	F35E8.10	mRNA	3.23947	3.40636e-07
173060	T02G6.5	mRNA	-4.35755	4.20188e-14
185774	btb-7	mRNA	-3.40718	1.28347e-10
173091	Y47H10A.5	mRNA	1.44419	1.31005e-81
177539	cla-1	mRNA	1	7.53266e-28
173785	W06B4.1	mRNA	-1.85762	2.4583e-156
172451	taf-11.2	mRNA	-1.71699	1.98415e-40
179606	rhr-2	mRNA	1.00856	3.40505e-08
175114	clec-147	mRNA	-2.03308	1.16376e-09
184882	delm-1	mRNA	2.87447	0.00011435
176276	F59B2.12	mRNA	-3.23947	3.65367e-24
178241	K08D8.6	mRNA	1.13221	7.52951e-234
179716	F45D3.2	mRNA	1.49145	1.81576e-70
184670	F19B10.5	mRNA	-1.60334	0.000552556
179496	D1054.10	mRNA	-3.57973	0
184164	F07H5.7	mRNA	1.06904	0.000255716
180839	C41G11.1	mRNA	-1.41442	2.33615e-18
185541	arrd-6	mRNA	1.38671	1.42536e-08
259569	nspd-3	mRNA	-1.98917	2.28701e-53
178134	ZK829.9	mRNA	-2.2703	6.17324e-62
186277	bus-18	mRNA	1.5888	4.04439e-10
191347	gst-30	mRNA	-2.13927	0.000583896
176830	Y38C1AA.7	mRNA	-1.25302	1.45594e-84
186228	col-127	mRNA	-2.36345	1.13102e-296
174738	clh-2	mRNA	1.09997	1.76509e-15
175330	pqn-82	mRNA	-1.40585	1.14339e-23
6418681	F55F10.3	mRNA	-1.60666	0.000920375
189950	clec-76	mRNA	4.69191	4.01267e-299
176545	Y47D3A.31	mRNA	-1.44679	6.78245e-28
185516	grl-27	mRNA	-2.14554	8.02564e-146
4926945	Y41E3.19	mRNA	-1.18366	2.27206e-05
185896	F47B8.3	mRNA	1.41819	1.61881e-16
186056	dod-23	mRNA	-2.6108	1.41627e-46
184085	F02D10.6	mRNA	-4.47805	3.16687e-06
179497	ule-3	mRNA	-3.8818	0
182755	C17H12.6	mRNA	1.25939	4.81118e-06
179404	R04B5.6	mRNA	1.04675	7.00989e-05
177789	col-122	mRNA	-3.21759	0
191435	tbx-36	mRNA	-3.05281	3.03446e-22
172580	C54G4.2	mRNA	-1.22524	8.61666e-16
175143	cdh-7	mRNA	1.58631	4.60064e-189
188641	T20D4.5	mRNA	1.79451	1.80938e-26
189640	Y38C1AA.6	mRNA	1.07477	0.000255753
180352	mlt-11	mRNA	1.19573	0
173021	cutl-10	mRNA	1.92898	7.22678e-55
180057	F57A10.2	mRNA	-1.3278	5.1554e-05
181542	F23D12.2	mRNA	-4.18587	9.65618e-24
173099	C15C6.2	mRNA	-1.23162	3.90923e-112
183933	D1086.5	mRNA	1.17556	2.95248e-10
177488	C34D4.3	mRNA	-1.58711	1.55954e-29
185609	F41D3.9	mRNA	-2.20163	0.000141656
186152	comt-1	mRNA	1.04286	1.48903e-09
190566	Y70C5C.1	mRNA	1.32193	3.13536e-11
176048	numr-1	mRNA	2.16993	2.72324e-10
185143	F31B9.3	mRNA	-1.76856	4.27546e-05
190461	Y62H9A.4	mRNA	-2.96875	1.59141e-178
180887	T25B2.2	mRNA	-2.66868	4.07076e-69
3565545	ceh-20	mRNA	1.02791	9.0044e-31
13188971	C54C6.11	mRNA	-3.94044	0.000762777
183123	C32E8.1	mRNA	-2.40136	5.10184e-05
171795	Y39G10AR.16	mRNA	-1.21796	7.84513e-26
188072	ugt-55	mRNA	1.19614	6.96798e-06
6418588	F30A10.14	mRNA	-2.64421	8.71155e-11
177808	gln-6	mRNA	-2.31158	0
185789	F45D11.15	mRNA	5.90689	1.76975e-07
179164	C37C3.9	mRNA	-1.29504	8.16154e-63
179286	hsp-16.1	mRNA	1.67368	1.50066e-228
181500	ekl-5	mRNA	-1.02586	3.93321e-12
180408	mrp-2	mRNA	1.23734	1.34494e-92
173727	fbxa-24	mRNA	1.88029	1.62122e-09
181619	F46F2.3	mRNA	1.33315	0
180424	T04G9.7	mRNA	-3.5057	1.81303e-134
174833	W03C9.2	mRNA	-1.20648	5.22599e-60
173632	Y110A2AL.9	mRNA	1.74758	2.92474e-06
175713	ZC155.4	mRNA	-1.04611	9.73422e-32
178061	cbd-1	mRNA	-2.4638	0
184236	F09C6.10	mRNA	-4.55117	3.168e-06
353386	nspd-10	mRNA	-1.81796	6.33498e-07
185697	decr-1.1	mRNA	-1.47787	2.8648e-28
180969	ugt-57	mRNA	1.60145	2.44891e-82
174481	F42A8.1	mRNA	-1.6271	2.72146e-86
177864	F44D12.8	mRNA	-1.15885	1.0912e-19
190426	Y59H11AM.4	mRNA	-1.33474	0.000351491
181365	ule-5	mRNA	-3.79429	0
187006	K04G2.4	mRNA	-1.43767	1.42725e-27
174684	R03D7.8	mRNA	-1.17071	1.19039e-11
178883	ugt-9	mRNA	1.45361	2.76151e-88
181957	B0393.6	mRNA	-1.05345	3.78188e-77
183970	DC2.5	mRNA	1.2007	2.5328e-34
172793	K07A1.13	mRNA	-1.78475	2.14069e-28
181985	B0416.4	mRNA	-3.26303	1.29831e-09
174174	gld-3	mRNA	-1.37847	5.11289e-227
3564930	F37C12.18	mRNA	-1.21038	3.77596e-12
189172	W03G11.2	mRNA	-2.44397	1.00234e-30
187987	T02E1.6	mRNA	-1.11985	1.37976e-11
190649	mif-4	mRNA	2.63504	1.08919e-12
185481	F38H4.6	mRNA	-1.01876	0.00024745
180878	C45B2.1	mRNA	-3.11501	1.10183e-278
182965	C27D9.2	mRNA	-1.69768	1.10125e-07
191338	dos-1	mRNA	-1.64714	4.43624e-16
181555	sym-1	mRNA	1.20152	0
184614	F17C11.2	mRNA	1.15362	0.000208832
182780	glb-6	mRNA	1.27028	1.51965e-08
191134	ZC266.1	mRNA	-1.34359	1.04154e-06
246024	his-27	mRNA	8.18488	1.17796e-08
179718	F45D3.4	mRNA	1.41023	1.57318e-125
177176	drd-50	mRNA	1.4179	3.79033e-19
3565809	ZK970.8	mRNA	-1.09726	5.71017e-05
189155	W03D8.1	mRNA	-1.05364	9.53442e-06
189844	Y42H9B.3	mRNA	-1.01106	2.17541e-28
174327	tdc-1	mRNA	-1.63579	4.81988e-166
189642	Y38C1AA.9	mRNA	1.13286	4.31699e-05
182712	C17B7.12	mRNA	2.96829	0.000114367
188650	T20D4.15	mRNA	2.11773	4.05045e-14
185942	oac-30	mRNA	-1.13981	2.39864e-22
179183	oma-2	mRNA	-2.39727	0
181623	Y15E3A.4	mRNA	1.11124	2.81867e-93
24104897	T14G12.12	mRNA	-4.20945	0.000126358
181582	C27C12.3	mRNA	-2.33958	1.82815e-14
29991192	Y41C4A.11	mRNA	1.84002	0.000560573
179905	D1086.10	mRNA	-2.10397	0
177443	C17H12.3	mRNA	-1	2.84544e-25
188633	lgc-50	mRNA	1.14109	5.37962e-10
176389	ZK632.5	mRNA	-1.21803	4.8222e-43
185604	oac-27	mRNA	1.60901	1.42293e-16
353455	nhr-168	mRNA	1.49325	3.32535e-14
187783	cdh-1	mRNA	1.10861	3.71348e-55
174677	egg-3	mRNA	-1.83889	4.5761e-137
177091	Y67D8B.5	mRNA	-1.22729	9.00872e-10
174224	wrt-10	mRNA	1.23129	2.10467e-238
188624	phy-3	mRNA	-1.5615	1.30839e-14
179548	K10D6.2	mRNA	1.61486	1.57558e-79
3565667	fipr-4	mRNA	1.41386	5.15643e-07
181409	R09A8.2	mRNA	-3.3505	5.21702e-29
173539	btb-6	mRNA	-1.75829	0.000178168
184746	ddo-3	mRNA	-2.48659	2.22776e-221
7040139	F59C6.16	mRNA	2.05779	3.06218e-42
192071	twk-23	mRNA	1.9419	0.000812332
182646	C15H11.1	mRNA	-1.27136	2.81068e-12
177266	ssp-11	mRNA	-1.5545	1.4499e-86
190498	nrps-1	mRNA	1.16993	2.69726e-05
175569	R07E5.6	mRNA	-1.24728	1.44771e-27
177734	fem-3	mRNA	-1.39721	1.77335e-33
190295	Y54G11A.4	mRNA	2.38416	1.81188e-94
174106	T14B4.19	mRNA	1.01803	1.13815e-28
180867	F22F4.4	mRNA	-1.096	2.41431e-08
3565085	K01F9.2	mRNA	1.03843	5.32718e-17
174575	ZK945.7	mRNA	-1.16016	2.41408e-44
180353	F53F8.3	mRNA	-2.70539	6.34606e-36
185176	F31F6.2	mRNA	-1.51362	0.000140278
179924	T16A9.5	mRNA	-1.05419	6.22492e-54
185622	oac-29	mRNA	1.80047	1.95162e-11
172300	T09B4.5	mRNA	1.02414	3.61065e-21
190603	Y71G12B.22	mRNA	-1.18829	6.87521e-10
177444	C17H12.12	mRNA	-1.53869	1.61402e-74
177346	C55C3.4	mRNA	-1.83906	1.05213e-16
188810	T23F6.2	mRNA	1.98185	0.000383933
353418	R05H11.2	mRNA	2.1216	3.33021e-12
186539	F58F12.3	mRNA	-1.30666	4.826e-13
188121	T05C12.1	mRNA	-1.18274	2.19252e-20
177351	C31H1.8	mRNA	-1.38642	2.59572e-76
183183	C33H5.1	mRNA	-4.24793	6.89708e-05
190567	clec-9	mRNA	4.32193	2.77203e-05
174813	F43G6.10	mRNA	-3.94734	9.71159e-14
260220	Y106G6G.4	mRNA	-1.43271	9.73709e-86
187119	K07F5.12	mRNA	-1.3388	5.97373e-11
178512	snf-9	mRNA	-1.30839	1.14e-43
177298	Y59E9AL.6	mRNA	-1.57637	2.14885e-91
186980	K04C1.5	mRNA	-3.13093	2.78036e-54
6418585	F21C3.7	mRNA	-1.02475	0.000911453
172325	spch-2	mRNA	-1.18098	3.10259e-44
189077	dgtr-1	mRNA	-1.4476	1.3428e-35
181388	C04B4.2	mRNA	-3.61411	1.89365e-93
259654	cdr-4	mRNA	1.03241	4.30992e-82
173893	C34F11.1	mRNA	-1.51317	3.39703e-08
177912	Y43C5A.4	mRNA	-1.34483	1.57747e-13
4363005	col-46	mRNA	1.06263	3.40772e-24
260110	F44D12.6	mRNA	-1.12691	1.0647e-10
186982	K04C2.5	mRNA	-1.26796	8.29234e-06
173197	T04D3.1	mRNA	-2.33442	8.62949e-12
185671	nspc-13	mRNA	-1.82185	1.26212e-20
175804	egg-1	mRNA	-2.59628	0
266900	plk-3	mRNA	-1.15117	0
184203	acl-13	mRNA	-1.10897	2.98173e-11
190829	Y102A5C.2	mRNA	-1.01625	2.00936e-06
183181	nhr-162	mRNA	1.03804	0.00056162
189703	Y38H8A.2	mRNA	-1.32553	1.43642e-05
187772	R10E4.7	mRNA	-1.4507	1.01436e-45
179698	K01D12.15	mRNA	-1.24534	1.59833e-07
185603	nhr-265	mRNA	8.00983	7.06733e-85
175981	col-8	mRNA	-4.09256	0
174496	M176.10	mRNA	-2.80735	0.000462183
181216	ZC373.2	mRNA	-3.82002	0
180576	F53B3.6	mRNA	1.21598	6.901e-116
186623	F59E11.6	mRNA	-1.44569	5.93942e-06
182889	C25E10.4	mRNA	1.41623	2.92e-11
179489	wdr-5.3	mRNA	-1.12517	1.12201e-54
188456	T12F5.2	mRNA	-1.07278	7.58316e-28
183138	nlp-35	mRNA	1.2919	0.000841153
188733	sptf-2	mRNA	1.96303	2.72863e-09
6418749	D1086.17	mRNA	-1.1653	2.15985e-35
174201	F21D12.3	mRNA	1.02274	4.87117e-22
183149	C33B4.2	mRNA	1.37611	1.14699e-11
177309	msp-59	mRNA	-1.49631	0
172261	noah-1	mRNA	1.03641	0
184591	F16H6.4	mRNA	1.00679	0.000846658
189494	irld-15	mRNA	3.15381	1.17413e-05
173821	F41C3.2	mRNA	1.39691	1.20701e-102
181378	col-181	mRNA	-3.25992	0
13211878	F41B5.1	mRNA	1.30698	0.000421008
183006	clec-230	mRNA	1.89947	1.00425e-17
179144	C50E3.11	mRNA	-3.66496	7.45845e-11
177695	col-3	mRNA	1.10702	0
3896830	H23N18.6	mRNA	3.01147	2.81124e-06
186028	F49C12.5	mRNA	-2.89308	0.000269792
6418571	C04F12.12	mRNA	-1.02675	0.000774463
24104609	F49F1.18	mRNA	-6.32193	0.000672772
174029	szy-4	mRNA	-1.76007	2.32298e-223
179070	spn-4	mRNA	-1.91336	0
185862	msrp-4	mRNA	-1.39709	2.34293e-05
188586	T19C3.3	mRNA	2.30408	3.25543e-57
172374	mei-2	mRNA	-1.48298	9.87576e-117
182379	irg-1	mRNA	1.25259	1.81452e-08
185199	ttbk-3	mRNA	-2.16123	1.29667e-18
178857	col-139	mRNA	-3.25621	0
191414	ZK697.8	mRNA	7.34873	3.88512e-05
181610	col-41	mRNA	3.98006	0
177061	Y54G2A.32	mRNA	1.06183	5.38795e-14
181146	F47E1.4	mRNA	-4.05311	1.16049e-22
173980	msp-63	mRNA	-1.94011	1.22514e-06
183328	fbxa-47	mRNA	5.72792	0.000284367
185531	F40D4.13	mRNA	1.7885	0.000871729
187450	M05B5.1	mRNA	-1.18701	1.38964e-28
177812	msp-79	mRNA	-1.69474	0
189623	best-20	mRNA	-2.97598	4.38914e-56
177901	col-124	mRNA	-3.22373	0
180510	meg-3	mRNA	-2.52648	2.7952e-100
191769	snf-10	mRNA	-1.21192	2.87883e-11
189157	W03D8.8	mRNA	1.09579	8.5514e-37
173886	C27D6.3	mRNA	-1.11088	3.63069e-13
186223	cpar-1	mRNA	-1.57469	1.0322e-58
175063	K09E4.4	mRNA	1.00323	6.13506e-11
173521	Y51H7C.3	mRNA	-1.553	4.14081e-21
175638	pal-1	mRNA	-1.59242	1.26277e-72
188838	T24B8.5	mRNA	2.19947	2.00032e-57
176602	col-95	mRNA	-2.73282	1.76159e-61
190424	npr-22	mRNA	1.22239	1.18322e-05
180385	R57.2	mRNA	1.20005	2.57435e-38
3565430	clec-169	mRNA	1.44911	1.34285e-93
183663	C50E3.12	mRNA	-2.33823	2.26859e-18
172508	chs-1	mRNA	-2.22389	0
13180558	F26B1.8	mRNA	-1.54599	1.75956e-101
259603	Y67A10A.10	mRNA	1.044	8.87107e-13
185168	ugt-42	mRNA	1.23983	1.53412e-08
175688	C45G9.10	mRNA	-1.71621	0.000681515
4926924	H38K22.6	mRNA	-1.28772	1.64305e-06
192088	zig-3	mRNA	-1.227	2.18281e-10
177678	F21D5.1	mRNA	-1.12737	3.73824e-83
173983	msp-64	mRNA	-1.44034	8.58602e-123
179975	R08A2.1	mRNA	-1.47491	6.4187e-17
3564876	F17B5.6	mRNA	3.12338	0.000864629
182619	C14F11.4	mRNA	-2.57169	0
13220525	C31H2.14	mRNA	-2.63743	0.000189398
259734	nspc-18	mRNA	-1.03997	6.78889e-12
188894	T25D3.3	mRNA	-1.67807	5.21928e-06
186565	F59A1.13	mRNA	-4.03814	1.28329e-10
183994	E02H4.2	mRNA	-1.69188	8.64595e-06
172534	T23G11.1	mRNA	-1.21305	1.7093e-83
182317	ztf-30	mRNA	1.61958	9.62571e-13
189148	W03B1.9	mRNA	-1.77952	4.13583e-26
182047	BE0003N10.3	mRNA	1.37513	1.05683e-19
180781	vit-2	mRNA	-3.37049	0
188967	T27A8.2	mRNA	-4.90689	3.87788e-08
185542	F40F9.3	mRNA	-1.18943	5.99617e-30
187643	msrp-7	mRNA	1.10543	3.3398e-07
191648	gcy-15	mRNA	1.0458	7.37901e-06
191053	ZC21.3	mRNA	1.10224	9.27108e-138
3565143	fbxa-219	mRNA	1.08847	2.4617e-06
182906	C25F9.6	mRNA	1.03634	9.99772e-05
188384	T10E9.6	mRNA	-1.42761	2.74879e-06
3565227	C01G10.15	mRNA	2.42425	4.3827e-26
189444	cyp-33D3	mRNA	2.09516	3.4977e-05
187278	K10G4.3	mRNA	1.52264	1.46283e-07
191525	cin-4	mRNA	-1.05352	3.5685e-28
178115	F38H4.4	mRNA	-1.47125	4.60551e-34
188525	lgc-54	mRNA	-1.56242	2.26094e-12
189984	Y47D7A.7	mRNA	-5.44294	9.31331e-12
173188	ZK1053.4	mRNA	-1.91427	1.22537e-06
174237	F18A1.7	mRNA	-2.01958	5.63761e-219
177843	sss-1	mRNA	-1.41389	9.07039e-248
176000	ogt-1	mRNA	-1.39774	4.09756e-198
187481	M151.4	pseudo	-3.32193	9.77617e-06
190650	Y73B6BL.14	mRNA	-3.22239	0.000359939
176049	numr-2	mRNA	2.16993	2.72257e-10
176311	C40H1.7	mRNA	1.07906	3.62626e-24
178971	col-140	mRNA	-3.35598	0
174540	arrd-4	mRNA	1.49399	1.87762e-07
172716	F32H2.7	mRNA	-1.45756	1.02159e-84
181858	pitr-3	mRNA	-1.07917	6.30227e-08
24105065	Y37E11B.10	mRNA	-1.20617	2.16415e-59
185302	F35E8.13	mRNA	3.23947	3.4057e-07
6418843	ttr-34	mRNA	-2.36724	3.1588e-97
189897	ttr-13	mRNA	-2.44057	3.09032e-05
187666	acs-15	mRNA	-1.13644	2.51087e-15
185573	hst-3.1	mRNA	1.38401	1.3536e-06
186128	F52F12.5	mRNA	-1.375	6.57228e-15
172323	oac-9	mRNA	-1.33236	2.61203e-20
180418	ncam-1	mRNA	1.21632	1.04293e-69
186889	K02E7.10	mRNA	2.77725	6.73387e-22
184528	pals-1	mRNA	1.61353	0.000930746
186146	F53A9.7	mRNA	1.15344	3.17592e-11
178688	clec-207	mRNA	-3.63421	6.28317e-06
178205	ham-1	mRNA	2.22851	4.42599e-36
178320	puf-3	mRNA	-2.24371	0
186264	F54H5.3	mRNA	-1.74859	1.11057e-09
176596	faah-6	mRNA	2.7578	2.19215e-25
176096	ceh-23	mRNA	1.19555	2.74722e-05
181272	ttr-14	mRNA	-2.43003	0
176721	col-97	mRNA	-1.06855	0
259462	E04D5.5	mRNA	-1.28494	0.000316959
184318	nhr-263	mRNA	4.19476	9.62643e-05
172495	col-62	mRNA	-3.2578	0
183598	clec-198	mRNA	1.06856	5.18835e-05
173127	ssp-37	mRNA	-3.76653	1.74717e-14
176085	cdh-3	mRNA	1.22239	4.11438e-45
177285	tkr-3	mRNA	-1.83212	9.86183e-08
184883	daf-10	mRNA	1.20163	0.000152703
184761	F21C3.6	mRNA	-1.72504	0.000269863
173644	K08A2.2	mRNA	-1.0014	1.38885e-11
189764	Y39G8B.5	mRNA	1.87447	7.88586e-05
189878	dmd-3	mRNA	1.76799	5.61986e-05
188423	nas-22	mRNA	-2.0113	8.24101e-21
13180657	ZC581.10	mRNA	-1.25916	3.752e-06
180884	nnt-1	mRNA	-1.18364	4.29923e-22
186083	col-133	mRNA	-1.19337	0
187408	nhr-201	mRNA	1.51341	5.63755e-18
172808	T05F1.5	mRNA	-1.07153	1.81078e-28
189121	W02D9.6	mRNA	-3.25514	9.88952e-13
186001	F48G7.13	mRNA	4.14684	1.18502e-20
181088	R09F10.8	mRNA	-3.34042	1.19466e-123
178380	Y67A10A.9	mRNA	1.18405	5.04564e-43
174065	cutl-16	mRNA	1.42578	3.36031e-30
186796	H32C10.1	mRNA	-1.44329	8.51832e-21
191295	ZK354.8	mRNA	-1.07937	4.99212e-28
182326	C06E4.3	mRNA	1.56571	1.55088e-09
191527	ZK1128.3	mRNA	-1.03138	7.05798e-11
180630	vit-5	mRNA	-3.9619	0
177291	C24D10.1	mRNA	-1.06091	3.41088e-17
191335	pqn-97	mRNA	3.12199	0.000864745
175115	C04H5.7	mRNA	-4.23367	1.22836e-25
173892	C34F11.8	mRNA	1.2848	2.01576e-15
171885	C45E1.4	mRNA	1.21988	5.986e-08
182486	gad-2	mRNA	-1.55639	0.000294888
176274	zif-1	mRNA	-1.45626	4.24504e-125
183218	C34G6.3	mRNA	-1.39259	6.03739e-15
188180	T06E4.10	mRNA	1.0214	4.63332e-26
185785	fbxc-42	mRNA	-3.06609	1.43896e-06
173804	T05A7.6	mRNA	-1.08746	4.56757e-43
177264	ssp-9	mRNA	-1.5545	1.44794e-86
181219	col-176	mRNA	2.07444	0
183635	nhr-129	mRNA	1.52962	8.97074e-10
176290	ZK512.7	mRNA	-1.79904	3.90627e-157
4363028	poml-4	mRNA	2.63126	2.11135e-13
175033	his-44	mRNA	1.18525	0.000847015
182487	C10A4.6	mRNA	-2.61667	0.000317818
189029	hic-1	mRNA	1.32468	1.68193e-12
185991	arrd-24	mRNA	1.88562	3.81e-09
191561	ZK1307.4	mRNA	-1.52356	1.34952e-29
178889	cpt-4	mRNA	1.80044	1.04625e-172
183401	C42C1.9	mRNA	-1.10584	2.06446e-12
172575	H05L14.1	mRNA	-1.20261	4.71462e-35
187395	M02B1.4	mRNA	-1.22141	8.11363e-12
3565715	Y73B6BL.44	mRNA	1.57677	1.16591e-18
4363061	Y57G11C.52	mRNA	-1.13102	0.000240758
184979	che-7	mRNA	1.01594	0.000308215
180532	peb-1	mRNA	1.07202	8.88372e-29
187099	srx-68	mRNA	1.98903	0.000383987
3565220	K02F6.3	mRNA	-1.1994	3.29524e-31
183213	C34E10.9	mRNA	-1.29172	2.8059e-07
181006	F48E3.4	mRNA	-3.27253	2.37525e-198
13212503	T05B4.14	mRNA	-1.25142	2.97635e-05
172647	rskn-1	mRNA	-1.22895	1.33231e-133
192089	zig-6	mRNA	1.09233	4.15931e-17
188277	T08B6.4	mRNA	-1.14145	2.01096e-86
178335	Y45F10C.4	mRNA	-2.93364	1.94779e-197
180763	T07F12.4	mRNA	1.19788	2.71161e-16
184473	cyp-13A12	mRNA	1.0972	1.38488e-07
180506	rgs-9	mRNA	-4.04836	2.15599e-22
175480	C14B1.9	mRNA	-1.69787	3.22109e-185
184721	cutl-3	mRNA	1.43182	1.12632e-14
180852	atat-2	mRNA	1.14343	3.52537e-13
185229	F33D11.7	mRNA	-1.24204	5.66194e-12
174836	mex-1	mRNA	-2.06817	0
191151	ZC395.4	mRNA	-1.01773	0.000179331
6418697	C25D7.16	mRNA	-1.00676	0.000328755
184503	F14H12.7	mRNA	-2.80392	3.88742e-05
177036	Y69A2AR.19	mRNA	-1.22334	1.66437e-88
181167	C23F12.4	mRNA	1.23034	7.90838e-11
180034	ZK1037.6	mRNA	-2.35238	1.19283e-20
188419	T11F9.1	mRNA	1.47732	0.000263207
189243	W06D11.3	mRNA	-4.12102	3.25682e-12
181624	Y15E3A.5	mRNA	1.65285	2.9061e-10
178804	nlp-31	mRNA	1.61372	1.50505e-34
188104	T05B4.8	mRNA	9.02791	9.19997e-31
185245	F34H10.4	mRNA	1.03194	5.54306e-05
172606	spe-12	mRNA	-1.41246	4.82694e-08
178428	Y73F8A.12	mRNA	-1.56731	1.48145e-07
176735	Y39E4B.5	mRNA	-1.37822	4.51467e-52
173751	R03H10.2	mRNA	1.85134	9.6822e-95
191643	gcy-5	mRNA	2.48543	0.000248489
183898	D1014.7	mRNA	-2.07039	1.20964e-08
174559	ZK892.4	mRNA	-1.21459	0.000239564
177983	ZK596.2	mRNA	-1.37176	6.94238e-13
174326	K01C8.1	mRNA	1.31373	0
180529	dpy-3	mRNA	1.05272	3.65478e-195
180130	fbxa-206	mRNA	-1.00993	3.53443e-12
185177	F31F6.3	mRNA	-2.73697	4.70755e-07
178034	col-126	mRNA	-2.36345	1.13576e-296
183682	C50F7.3	mRNA	-1.67649	1.65329e-19
188647	T20D4.11	mRNA	1.58431	8.30541e-27
185806	otpl-5	mRNA	2.1375	0.000155118
181308	col-179	mRNA	-3.24293	0
184491	F14H3.5	mRNA	-2.27798	5.40799e-05
180484	D1005.2	mRNA	1.63752	1.801e-57
178462	fipr-28	mRNA	-7.34873	0.00067268
178359	Y37A1B.7	mRNA	1.00426	5.79467e-28
189662	nspe-5	mRNA	8.26679	0.000147013
183619	irg-2	mRNA	1.05377	0.000593968
177911	Y43C5A.2	mRNA	-4.06449	0
191496	nhr-245	mRNA	11.0314	4.84269e-165
3896784	C55C3.8	mRNA	-2.63227	2.32407e-06
182983	C28D4.8	mRNA	-1.46097	2.11207e-05
178391	Y57G11B.5	mRNA	-3.77733	1.56494e-238
181574	tatn-1	mRNA	1.00295	0
259387	DY3.8	mRNA	-1.37219	2.14742e-32
3565321	Y53C12A.7	mRNA	-1.29521	0.00081762
3896805	Y54G2A.48	mRNA	-3.87447	1.0457e-06
186732	H12I13.1	mRNA	-1.48278	1.48734e-06
189452	Y17D7C.2	mRNA	6.12928	3.8845e-05
182419	C08F11.3	mRNA	-1.24537	0.000443748
179351	col-147	mRNA	1.20356	0
173011	clec-99	mRNA	-3.74024	6.28427e-06
174561	F52H3.6	mRNA	-1.38269	1.71066e-62
189799	Y40H4A.2	mRNA	-1.38183	1.06878e-16
178239	ZK896.5	mRNA	1.55184	1.7633e-61
188911	wht-6	mRNA	-1.16596	2.48183e-18
175626	F17C8.6	mRNA	6.14975	7.55739e-05
176759	T03F6.6	mRNA	-1.21286	2.51373e-42
177958	fmo-2	mRNA	1.74827	1.94055e-12
187705	cyp-33C8	mRNA	1.11619	2.55938e-37
177098	W08E12.3	mRNA	1.25543	1.00552e-57
187856	ttr-8	mRNA	1.11032	3.54437e-17
191170	ZC443.4	mRNA	1.52725	6.11852e-20
4363131	C36E6.8	mRNA	-1.66304	2.17135e-22
189167	W03G1.5	mRNA	1.55325	1.1574e-08
174857	rol-1	mRNA	-1.60168	0
187223	K09E3.7	mRNA	-2.64909	3.3467e-15
185746	clp-8	mRNA	-1.32847	7.03794e-08
179100	fat-7	mRNA	-1.385	1.34944e-171
176585	ztf-29	mRNA	1.59648	2.64468e-14
172470	ztf-15	mRNA	-1.00431	9.41868e-39
3565797	C27B7.9	mRNA	-3.51616	1.44177e-09
191292	msp-51	mRNA	-1.6821	0
172324	C10G11.8	mRNA	-1.42899	1.99138e-143
191005	Y116A8C.29	mRNA	1.06577	0.000523266
185173	fbxa-72	mRNA	1.07981	1.67297e-195
175257	pef-1	mRNA	1.06413	7.75789e-11
171777	W03F11.5	mRNA	1.68824	2.33799e-15
191692	ins-34	mRNA	2.42877	2.87776e-20
178884	C02E7.7	mRNA	-1.06662	3.87879e-136
175596	pan-1	mRNA	1.18974	2.4597e-221
13186765	M02G9.4	mRNA	-1.63053	2.32358e-06
187558	R03H10.6	mRNA	1.57949	3.70819e-06
186853	K01G12.3	mRNA	-2.78136	1.59517e-07
177554	C50F7.5	mRNA	2.43889	1.09125e-222
191249	ZK218.11	mRNA	7.20945	5.96855e-09
4363108	C01G10.17	mRNA	3.07788	4.0999e-11
183956	msrp-5	mRNA	-1.67362	7.9753e-26
171660	Y18H1A.1	mRNA	-1.68895	1.7732e-24
180258	Y39B6A.10	mRNA	-3.63485	1.30931e-45
266855	C34F11.5	mRNA	-1.12273	1.20841e-50
191208	ZK6.8	mRNA	1.21577	3.35118e-85
189735	Y39B6A.9	mRNA	-1.2076	0.000204989
174324	F35C11.3	mRNA	-2.10138	2.65009e-26
179217	mom-2	mRNA	-1.52772	1.90484e-71
180909	col-169	mRNA	2.0398	0
179929	F14D7.2	mRNA	-3.28224	1.55047e-86
178406	Y57G11C.14	mRNA	-1.18294	1.38187e-14
178925	F08F3.6	mRNA	-3.43588	1.33711e-85
179861	T01D3.3	mRNA	2.66523	7.38433e-43
181502	meg-1	mRNA	-3.54324	9.82967e-230
177014	M70.1	mRNA	-1.10711	1.37563e-20
171830	msrp-1	mRNA	-1.50267	1.53089e-13
176061	cgh-1	mRNA	-1.57393	0
172276	C06A5.8	mRNA	-1.28272	4.03684e-25
178010	M7.10	mRNA	-6.12928	0.000672404
24104655	F56D6.22	mRNA	-1.09095	9.05994e-05
178832	F32D1.3	mRNA	1.34901	2.26642e-10
172784	klp-16	mRNA	-1.20097	1.71143e-131
177916	R09E10.6	mRNA	-1.46673	4.06479e-255
187253	grl-6	mRNA	2.654	8.90705e-16
191624	ceh-40	mRNA	-2.29662	0.00013735
178929	snpc-1.3	mRNA	1.81688	1.08922e-17
172638	D1081.7	mRNA	-1.26803	0
24104567	F41H10.1	mRNA	-1.58972	3.2957e-93
179138	ftn-1	mRNA	1.32589	3.63266e-09
179224	pos-1	mRNA	-2.38416	0
190686	acr-24	mRNA	1.20436	4.99723e-06
24104233	C23H5.15	mRNA	1	0.000242173
185895	F47B8.2	mRNA	1.00584	3.17431e-20
172207	pup-3	mRNA	-1.62081	6.41022e-06
184774	F21D9.4	mRNA	1.14852	0.000110544
190077	Y49F6A.5	mRNA	-4	9.27184e-08
189616	Y37D8A.8	mRNA	-1.07756	0.000971842
181372	C49F5.6	mRNA	-2.34179	1.81319e-43
171993	cyb-2.2	mRNA	-1.84525	8.15089e-204
177887	msp-38	mRNA	-1.82823	5.51401e-70
185409	gst-14	mRNA	4.9504	5.29971e-108
186348	F56A4.5	mRNA	3.10639	2.07469e-26
188106	T05B4.10	mRNA	7.67948	3.32534e-12
182932	C26B9.6	mRNA	1.48393	1.624e-07
177878	C04G2.9	mRNA	-1.43067	0
178799	C17E7.9	mRNA	-2.65253	2.29723e-14
3565301	igdb-1	mRNA	2.25117	1.26018e-59
6418876	ZK813.7	mRNA	-3.90232	0
187693	fbxa-147	mRNA	-2.88982	0.000157414
172445	col-60	mRNA	-2.31492	0
173594	fbxa-182	mRNA	1.05025	6.1393e-07
186113	hsp-17	mRNA	1.19991	2.31781e-122
188476	T13F2.4	mRNA	1.46226	8.97082e-13
185310	F35F10.5	mRNA	1.30297	1.59665e-09
184303	F10E9.1	mRNA	2.02425	9.00284e-05
177301	Y59E9AR.1	mRNA	-1.09417	4.88688e-162
177306	F36H12.4	mRNA	-1.00146	0.000836977
190110	scrm-7	mRNA	-1.51107	3.22816e-08
183744	C53B7.2	mRNA	-2.69659	6.10124e-89
188761	lbp-8	mRNA	1.0996	2.24039e-14
174158	nos-2	mRNA	-2.51148	4.31269e-126
181800	abu-1	mRNA	-1.06325	1.98097e-163
178340	C47A4.3	mRNA	-1.18921	9.464e-13
179188	sth-1	mRNA	-2.13961	1.68144e-48
177629	F17E9.5	mRNA	-1.51908	1.88738e-202
178531	F11E6.7	mRNA	-1.07327	5.79951e-128
180149	lsy-27	mRNA	-3.65696	2.70731e-29
179813	C50B6.7	mRNA	-1.02688	1.02729e-15
3565251	Y39G8B.10	mRNA	1.47482	9.05872e-05
191710	F59A6.2	mRNA	-1.08271	6.67256e-07
3565591	F55B11.5	mRNA	-2.29662	3.32366e-05
175570	R07E5.15	mRNA	-1.16545	7.03965e-28
171744	Y71G12B.6	mRNA	1.2659	1.15311e-121
3564911	F32H2.11	mRNA	1.19981	1.17252e-05
191605	acr-19	mRNA	1.42742	1.46e-05
182740	folr-1	mRNA	-1.67195	0.000245855
187343	K12H6.4	mRNA	-4.27479	3.75518e-05
178064	memi-3	mRNA	-2.14461	2.11268e-143
172315	T08B2.12	mRNA	-1.19939	4.82888e-92
183526	C47A4.5	mRNA	-1.32193	3.84828e-05
178058	T01G1.2	mRNA	1.20668	1.50436e-15
182826	C24A3.1	mRNA	4.08746	9.62496e-05
186009	fbxb-67	mRNA	-2.64386	0.000189453
188777	T23B12.5	mRNA	1.20732	0.000253396
177972	swt-3	mRNA	1.00397	1.75756e-63
191342	dyf-2	mRNA	1.05889	1.37605e-05
3565413	col-135	mRNA	-3.44815	1.79433e-75
177739	F23B2.7	mRNA	-1.12262	2.21616e-11
185299	gst-38	mRNA	1.04706	1.10212e-08
173730	nep-3	mRNA	-1.38466	0.00054203
187045	nas-3	mRNA	2.13535	3.38897e-22
259409	fipr-22	mRNA	1.71212	6.91251e-06
187598	R05A10.8	mRNA	2.30875	0.000685399
177817	T13F2.6	mRNA	-1.22882	2.69636e-100
173849	msp-31	mRNA	-1.38156	3.28742e-249
173837	nspd-5	mRNA	-1.66794	8.31676e-26
173856	try-1	mRNA	-3	2.21057e-58
178840	skr-7	mRNA	-3.55833	9.91739e-15
187305	K11G9.3	mRNA	-2.64211	2.29651e-14
179810	nasp-2	mRNA	-1.76336	0
186157	F53C3.1	mRNA	-1.08897	3.04037e-10
188608	T19D12.5	mRNA	-1.26255	3.22166e-10
174706	bigr-1	mRNA	1.81809	1.01023e-36
188043	T04A11.2	mRNA	1.28353	8.19911e-08
174889	F15A4.10	mRNA	-3.76288	3.45781e-06
187458	M7.12	mRNA	1.2793	5.429e-09
180328	pqn-94	mRNA	1.18379	8.95759e-45
187441	M04C9.4	mRNA	-1.32971	8.20043e-15
174826	vab-23	mRNA	1.01528	1.31573e-21
181807	sfxn-1.1	mRNA	-1.30485	2.4186e-10
178965	F44E7.2	mRNA	-1.31041	5.44486e-94
172305	pigv-1	mRNA	-1.09212	1.09091e-106
172329	ima-2	mRNA	-1.01046	2.41717e-263
177835	ssq-1	mRNA	-1.58419	1.14002e-195
187722	R09A8.1	mRNA	-3.10236	1.2338e-25
180119	gyg-2	mRNA	-2.24523	0
174008	ZK84.1	mRNA	-1.13424	0
190409	rgs-8.2	mRNA	-2.37917	8.81719e-11
3565964	F14F3.4	mRNA	1.61576	2.42664e-05
172854	T24D1.3	mRNA	-2.1476	4.61976e-184
185170	nhr-180	mRNA	1.11121	1.15739e-14
259397	B0511.11	mRNA	-1.35443	2.68065e-40
187895	R105.1	mRNA	-1.2948	9.95544e-38
187530	R02F2.8	mRNA	1.08552	2.40109e-15
179123	C03G6.5	mRNA	1.34255	1.48018e-24
179926	ent-3	mRNA	-1.24925	1.76022e-31
183476	cdh-10	mRNA	1.42138	0
3565257	Y59E9AL.3	mRNA	-2.00612	4.39544e-245
175051	F01D5.7	mRNA	-1.65208	7.86356e-06
172188	C24A11.1	mRNA	-1.18131	1.70782e-16
176105	tyr-1	mRNA	1.4481	4.23436e-89
13187572	Y46G5A.38	mRNA	1.1064	1.48198e-10
179909	D1086.1	mRNA	-1.44784	0.000494503
173695	col-71	mRNA	-1.39354	0
191515	nit-1	mRNA	1.70311	2.96667e-59
177719	unc-129	mRNA	1.08246	4.34865e-17
173720	T24E12.5	mRNA	1.41359	4.54719e-13
186846	K01D12.8	mRNA	-1.45503	1.47963e-15
174969	F15D4.5	mRNA	1.16871	1.22363e-29
173506	Y57G7A.6	mRNA	-1.00801	9.66028e-41
174941	cyd-1	mRNA	1.35242	9.66737e-22
13223834	F23D12.11	mRNA	-2.10312	1.37508e-44
184508	efn-3	mRNA	-2.53842	1.13789e-14
176484	Y39A1A.9	mRNA	1.76915	1.25994e-209
172710	F53B6.7	mRNA	-1.66482	1.06336e-32
24105111	Y47D7A.18	mRNA	-6.78136	1.88643e-06
177300	Y59E9AR.7	mRNA	-2.88363	0
180632	dhs-27	mRNA	1.25544	2.35332e-35
187312	K11H12.5	mRNA	1.46792	0.000263169
186007	clec-33	mRNA	3.08746	0.000864978
177802	msp-76	mRNA	-1.52533	0
24104282	col-175	mRNA	-1.33228	0
186265	F54H5.5	mRNA	-1.00622	2.4665e-12
13219051	R04A9.9	mRNA	-1.78727	4.04799e-06
181573	unc-3	mRNA	1.36528	0.000102803
186026	F49C12.3	mRNA	-4.1964	0.000230815
181113	F18E9.7	mRNA	-3.45943	0.000115671
174551	C05C10.5	mRNA	-2.2759	2.25205e-161
181664	wrt-4	mRNA	-1.13156	4.4337e-178
3565398	Y105E8A.27	mRNA	-1.05963	5.38004e-17
185859	msrp-3	mRNA	-1.35906	1.90585e-14
191291	ZK354.3	mRNA	-1.13173	3.98164e-12
177261	Y9C9A.8	mRNA	1.72495	5.7231e-23
182736	C17F3.3	mRNA	-1.34571	8.81353e-15
173186	ZK1225.5	mRNA	-1.77998	1.14839e-10
191306	ZK381.2	mRNA	1.96605	5.17874e-08
4363054	Y71H2AM.25	mRNA	-2.61891	2.734e-05
184599	ent-5	mRNA	-3.77998	5.90102e-58
183068	C30H6.5	mRNA	-1.43949	2.99427e-87
180158	ztf-25	mRNA	-3.16161	3.13448e-18
183808	nhr-172	mRNA	1.89372	6.42159e-09
174709	srap-1	mRNA	2.12962	0
181766	F10D7.3	mRNA	1.25076	7.96396e-22
189702	abf-4	mRNA	3.75582	1.20027e-14
184560	nhr-178	mRNA	1.15863	3.08231e-09
181840	B0207.11	mRNA	-1.45144	2.54053e-07
191058	fbxa-30	mRNA	2.52356	8.85972e-05
177784	C33A12.4	mRNA	1.92625	4.34339e-09
172480	eat-5	mRNA	1.36335	1.6639e-06
184903	F23F1.6	mRNA	-1.94357	6.61772e-36
172490	F07A5.4	mRNA	1.22013	0.000358738
178926	cyp-14A5	mRNA	1.65187	2.86961e-129
259993	T19A6.4	mRNA	2.23266	1.82172e-54
184810	F22B5.6	mRNA	-2.74655	4.39453e-14
177151	clec-67	mRNA	1.46694	3.10428e-131
183557	C47E12.11	mRNA	-1.15491	4.43361e-13
186791	H27M09.5	mRNA	-1.3545	4.63472e-10
189697	Y38H6C.16	mRNA	1.16016	5.86817e-20
182741	C17G1.2	mRNA	-3.46505	2.83374e-77
175321	Y22D7AR.10	mRNA	-4.0485	1.60913e-25
182603	C14C6.6	mRNA	-4.80735	0.000672588
174124	C44B7.5	mRNA	-3.509	1.58654e-257
181195	rrc-1	mRNA	1.05399	3.19863e-26
178998	atf-8	mRNA	1.18716	7.65656e-22
173153	Y18D10A.11	mRNA	-1.40665	2.73797e-125
181448	K08H2.3	mRNA	-1.48889	8.75332e-06
186139	F53A2.3	mRNA	1.14787	5.07901e-07
183166	lact-5	mRNA	1.15433	1.09905e-27
13181077	T28B8.4	mRNA	-1.68917	9.27232e-39
172862	C03C11.1	mRNA	-1.03883	3.27706e-11
184113	his-49	mRNA	8.18488	1.1777e-08
176260	cdc-25.3	mRNA	-3.04933	1.19462e-41
28661655	T16G12.12	mRNA	2.01182	3.41659e-08
184260	F09F7.6	mRNA	1.42558	7.71597e-15
172810	dhs-4	mRNA	1.83752	3.80879e-61
188843	T24C4.2	mRNA	-2.73697	0.000462247
176854	col-101	mRNA	-2.61763	0
176538	W09D6.4	mRNA	-1.12248	1.88288e-17
177409	lgc-10	mRNA	1.76553	3.53963e-06
182208	C04E12.2	mRNA	1.10668	6.74201e-22
180908	col-168	mRNA	1.19296	0
186444	F57C7.4	mRNA	1.02466	0.000846544
191914	sri-40	mRNA	-1.429	6.01112e-13
181893	odd-1	mRNA	1.67128	1.44444e-09
180517	Y102A11A.6	mRNA	1.48543	5.07748e-10
26591681	C17B7.15	mRNA	1.96301	7.48678e-06
3896758	F54H12.7	mRNA	-1.04648	9.16137e-08
182160	lab-1	mRNA	-1.8671	8.79358e-40
190371	Y57G11C.5	mRNA	-1.0363	5.59152e-21
180489	F09E10.1	mRNA	-2.45989	2.50005e-13
180080	argk-1	mRNA	-1.07073	1.0075e-62
178008	bcc-1	mRNA	1.34217	1.76615e-30
187838	frpr-16	mRNA	1.29672	8.26217e-06
175008	gst-20	mRNA	1.79829	6.76008e-120
180397	col-19	mRNA	-3.57575	0
174957	F32A11.3	mRNA	-1.0292	1.82614e-104
177830	msp-56	mRNA	-1.24681	7.22742e-190
180942	mdl-1	mRNA	1.08431	4.28951e-199
189144	W03B1.5	mRNA	6.84549	2.2617e-16
190159	Y51H4A.25	mRNA	1.1048	3.92292e-08
4362999	B0205.13	mRNA	1.24091	2.83981e-20
179323	F36D4.1	mRNA	-1.54374	0.000262374
189848	Y43C5A.3	mRNA	2.00631	3.41732e-08
3565341	Y39G8B.9	mRNA	1.47737	2.30139e-97
178120	let-653	mRNA	1.53119	1.54952e-194
178203	F53B2.8	mRNA	1.01475	6.06052e-60
184675	F19C6.3	mRNA	1.17834	0.000698256
6418831	C04E7.5	mRNA	-3.49643	3.65627e-05
188111	T05B11.4	mRNA	-1.28043	6.85146e-14
190573	Y70G10A.3	mRNA	1.00116	1.73585e-27
3564764	T16G12.9	mRNA	-1.97046	2.1206e-05
191434	ZK829.1	mRNA	1.03328	0.000959838
24104900	grd-6	mRNA	-1.35619	0
4363055	fbxa-42	mRNA	-2.52973	1.42643e-17
179561	clec-223	mRNA	-4.39506	1.33034e-105
187826	pqn-60	mRNA	2.00602	4.52152e-111
173833	C33F10.11	mRNA	-1.44136	1.0989e-40
180164	twk-36	mRNA	1.46713	2.31211e-05
13217480	F36D3.16	mRNA	-1.39128	2.59484e-19
178007	klc-1	mRNA	-1.00719	3.10462e-91
174897	Y38E10A.17	mRNA	-1.38664	6.04138e-114
174123	aff-1	mRNA	1.3503	7.00926e-22
173881	F09C12.8	mRNA	-1.07677	2.56567e-23
178839	skr-14	mRNA	-3.30378	0.000204227
184825	F22D3.4	mRNA	-1.12832	1.65769e-05
180107	F36D3.4	mRNA	-1.14538	2.66016e-26
13222788	F38B2.6	mRNA	-2.11243	4.33509e-26
174708	sfxn-1.2	mRNA	4.94173	1.00349e-30
179776	T16G1.4	mRNA	1.36534	7.69497e-20
172166	B0261.6	mRNA	-1.26785	2.1079e-25
191287	ZK353.3	mRNA	-1.88106	7.16351e-07
173938	ZK177.1	mRNA	-4.10369	1.34658e-26
182610	C14C11.1	mRNA	-1.08818	2.19308e-24
3564828	flp-25	mRNA	1.96467	0.000384042
183957	D2063.1	mRNA	1.57167	1.05476e-14
189983	Y47D7A.6	mRNA	-5.22561	8.41171e-10
191421	ZK757.2	mRNA	1.03532	1.67322e-07
13198891	cyp-31A5	mRNA	-1.00464	2.7301e-19
181467	jmjd-3.3	mRNA	-2.80735	0.000269869
3896802	Y54G2A.45	mRNA	1.17673	1.12493e-86
183004	C29F3.3	mRNA	4.15399	2.76713e-68
13197764	R09E10.13	mRNA	3.64302	7.86125e-06
178243	K08D8.5	mRNA	2.09102	5.12154e-86
178315	Y38H8A.3	mRNA	-1.02595	3.31985e-37
13190191	R13A5.15	mRNA	-2.25939	3.16336e-06
177950	nkb-2	mRNA	-1.20499	2.70373e-29
173729	skr-15	mRNA	-4.48727	1.09744e-05
179187	col-43	mRNA	-1.58496	7.23124e-05
173464	Y39F10A.1	mRNA	1.0793	9.26725e-05
189486	Y19D10A.8	mRNA	5.59991	5.07685e-11
188585	best-17	mRNA	1.775	1.86574e-76
173158	car-1	mRNA	-1.20457	0
172918	maph-1.2	mRNA	-1.18306	1.99328e-188
174533	mab-3	mRNA	1.0176	0.000296522
176413	C05B5.5	mRNA	1.20945	4.61224e-05
177694	col-117	mRNA	1.10702	0
189498	fbxb-7	mRNA	-2.2109	8.77607e-05
179553	T19B10.5	mRNA	1.68074	5.50152e-125
6418698	C25F9.11	mRNA	2.03562	6.57764e-17
186024	F49C12.1	mRNA	-5.49185	0.000184004
184414	gnrr-7	mRNA	-1.34577	0.000246722
187555	R03H10.1	mRNA	-1.05578	9.53606e-06
177614	B0218.7	mRNA	-1.27279	2.07382e-52
182172	nhr-148	mRNA	2.08168	2.11936e-15
189116	W02D7.4	mRNA	-1.1465	9.17232e-11
177274	msp-57	mRNA	-1.59252	0
178187	thn-2	mRNA	-1.97059	2.63325e-49
177404	Y73B6BL.23	mRNA	-1.16124	5.1542e-42
183642	C50C3.5	mRNA	1.16595	2.26611e-05
184092	F02E8.4	mRNA	-3.10454	6.10965e-145
189239	W06D4.3	mRNA	-1.22936	1.61319e-05
185281	clec-137	mRNA	-2.42502	0.00021117
191686	ins-5	mRNA	1.38541	4.20635e-05
172819	C04F12.7	mRNA	-1.30716	1.26311e-117
180578	F53B3.5	mRNA	1.25021	2.5424e-28
175684	C45G9.6	mRNA	1.21372	3.51915e-13
177870	cwn-2	mRNA	1.24516	5.03544e-17
180075	F14H3.3	mRNA	-2.96782	4.93274e-15
174814	F43G6.7	mRNA	-3.41976	9.52262e-15
353440	F08F3.10	mRNA	1.36786	0.00020428
259632	C37C3.12	mRNA	2.0793	1.35864e-18
180115	nhr-112	mRNA	1.67281	4.91708e-17
24104374	D2062.1	mRNA	-1.17918	1.06481e-07
173707	M151.7	mRNA	-3.21011	1.52281e-33
190218	Y53F4B.19	mRNA	-1.21408	5.4918e-19
177359	H04M03.3	mRNA	-2.54099	8.57149e-36
173839	col-17	mRNA	1.00317	0
179785	far-3	mRNA	-2.05383	5.06718e-104
191630	T08G11.2	mRNA	-1.01749	1.82686e-11
174686	col-81	mRNA	-3.30743	0
188938	srd-27	mRNA	4.25987	1.74429e-21
179763	anp-1	mRNA	-1.38201	6.93207e-149
177060	Y54G2A.10	mRNA	2.48175	7.48717e-69
175021	arrd-14	mRNA	1.60495	4.67219e-90
180087	F21H7.2	mRNA	-1.21369	1.76751e-42
177748	col-120	mRNA	-2.37	0
260235	Y47D7A.15	mRNA	-2.46996	0
192053	taf-7.1	mRNA	-1.0836	0.000442157
184406	F13A7.11	mRNA	1.46551	3.79616e-10
176811	mlc-7	mRNA	-1.6521	8.80546e-67
180038	dhs-23	mRNA	1.94945	2.71353e-15
175991	cpg-2	mRNA	-2.6592	0
176039	F56C9.11	mRNA	-1.07492	1.17758e-20
183184	C33H5.2	mRNA	-3.14684	3.01788e-05
6418643	best-23	mRNA	1.03562	9.4035e-06
172683	gska-3	mRNA	-1.20833	2.09878e-35
191716	nex-3	mRNA	-1.06325	5.83035e-33
181639	tbh-1	mRNA	-4.04297	0
177328	Y4C6A.4	mRNA	-1.7605	0.000747145
172158	bro-1	mRNA	2.72893	0.000599126
180271	srw-86	mRNA	1.85683	1.74756e-05
188142	pzf-1	mRNA	-2.90304	2.66713e-25
184939	F25H5.8	mRNA	-2.88524	3.69873e-60
183418	C43G2.3	mRNA	-1.60448	3.39313e-20
191214	clec-97	mRNA	-3.68416	6.99925e-19
172828	F26E4.5	mRNA	-1.4186	1.03633e-07
182082	C01G10.5	mRNA	3.00056	2.98653e-21
172830	drsh-1	mRNA	-1.08477	1.33807e-57
172090	kca-1	mRNA	-1.65167	8.95827e-150
179841	bir-2	mRNA	-1.18622	4.25964e-46
174558	ZK892.3	mRNA	-1.10692	1.04465e-10
182579	C13F10.6	mRNA	-1.03217	1.62923e-51
178986	cpg-4	mRNA	-1.15808	6.7889e-76
179145	C50E3.13	mRNA	-4.02407	3.51432e-29
181501	meg-2	mRNA	-2.43296	1.54237e-25
178520	C49C3.11	mRNA	-2.79442	2.74211e-07
179450	ugt-2	mRNA	1.19687	8.91366e-51
176955	col-106	mRNA	-3.19134	0
172289	msrp-2	mRNA	-1.22204	3.34552e-59
176711	Y37D8A.19	mRNA	-3.97146	1.12824e-214
171778	ule-1	mRNA	-4.05878	1.49572e-175
175120	catp-4	mRNA	-1.25727	9.07056e-119
184240	F09D12.2	mRNA	-2.35755	8.38578e-05
175026	his-15	mRNA	1.18525	0.000847243
24104515	F31D5.1	mRNA	-2.53942	1.23582e-36
177768	C10C5.4	mRNA	-1.95454	1.51867e-102
181673	F53H4.2	mRNA	-2.23787	7.65481e-203
190658	Y73C8B.1	mRNA	1.2899	4.19703e-29
179825	col-162	mRNA	-1.23127	0
186765	parg-2	mRNA	1.46113	1.18591e-06
190383	Y58A7A.5	mRNA	1.4565	1.24838e-23
180040	cyb-3	mRNA	-1.43316	0
187474	M110.7	mRNA	-1.44626	6.65933e-21
259448	oig-4	mRNA	1.13404	0.000170887
178155	col-129	mRNA	-3.09811	0
3565166	fbxa-136	mRNA	2.75489	8.88228e-08
182985	glb-9	mRNA	1.46949	0.000263131
191658	gcy-37	mRNA	1.44057	0.000114032
187867	nhr-270	mRNA	2.76081	6.47536e-10
173296	src-2	mRNA	1.03763	3.4152e-25
188860	T24E12.1	mRNA	-2.98793	1.02489e-08
188590	T19C4.1	mRNA	1.51849	7.78326e-74
3564929	F21H12.7	mRNA	2.05733	0.000405207
177575	kin-26	mRNA	-1.08233	2.98701e-10
176894	K11H12.4	mRNA	2.58813	1.60247e-306
189924	Y45F10D.2	mRNA	1.18078	0.000421011
180189	clec-42	mRNA	1.89596	2.87202e-36
178755	lag-2	mRNA	1.28264	0.000600109
188360	cyp-13A2	mRNA	1.97141	3.91736e-169
186061	F49E12.10	mRNA	-1.02631	0.000774568
179680	tbb-6	mRNA	1.24036	8.81005e-38
174336	col-77	mRNA	-1.24476	0
186798	slc-36.4	mRNA	1.53722	2.90204e-22
185721	F44A2.7	mRNA	5.35755	3.42536e-11
175525	rnr-2	mRNA	-1.05949	8.39805e-119
173024	oac-34	mRNA	3.58289	7.21456e-74
180079	cth-1	mRNA	-1.29883	1.41127e-178
181364	Y62H9A.5	mRNA	-3.76505	0
179146	grsp-4	mRNA	1.18631	2.6752e-39
178336	fbxa-215	mRNA	-1.7373	2.95366e-160
13213873	ZC513.14	mRNA	2.36923	1.27986e-05
24104699	hrg-2	mRNA	2.99331	7.72764e-25
177910	nspd-7	mRNA	-1.21166	3.88935e-09
3565389	C47E12.12	mRNA	-1.23664	1.88175e-05
3565848	Y6G8.5	mRNA	3.07241	0.000864862
187937	mbr-1	mRNA	-1.08983	1.09971e-06
177311	msp-65	mRNA	-2.06787	6.82452e-247
179950	F08H9.2	mRNA	-1.84007	2.84978e-61
179151	T05B11.1	mRNA	1.77244	7.22903e-117
173682	T06D4.1	mRNA	-2.75489	3.84752e-61
178412	ccch-5	mRNA	-4.75489	1.37283e-07
190377	Y57G11C.23	mRNA	-1.30678	4.42497e-16
183937	D2007.1	mRNA	1.09422	1.1159e-14
180497	meg-4	mRNA	-2.71383	3.38893e-46
175755	R02F2.4	mRNA	-1.47338	1.10347e-62
172251	nhr-2	mRNA	-2.1822	3.27868e-06
187890	ttr-29	mRNA	1.61633	3.31461e-25
173844	msp-33	mRNA	-1.63031	2.10725e-196
188512	T15B7.1	mRNA	-1.10918	1.33013e-153
179501	C29A12.1	mRNA	-1.1823	9.69108e-56
175856	F40H6.1	mRNA	-1.03623	8.21933e-09
173660	ins-31	mRNA	-3.29155	4.76708e-08
172797	K07A1.6	mRNA	-1.70754	1.25261e-06
13219566	F47G3.4	mRNA	1.11123	7.80927e-09
175649	gipc-1	mRNA	-1.15693	2.54031e-157
184574	F16F9.3	mRNA	1.16301	2.05291e-06
189313	ins-33	mRNA	1.48462	3.32638e-14
172549	gras-1	mRNA	-1.21611	7.71496e-29
3564816	ZK1290.14	mRNA	1.30693	1.22799e-18
192024	str-180	mRNA	-1.67929	5.2202e-06
187552	bus-1	mRNA	1.26976	1.51932e-08
183564	rom-2	mRNA	1.08651	0.000747345
173669	fbxc-50	mRNA	-2.11114	4.55873e-70
180937	acr-3	mRNA	2.58496	0.000231211
172002	R12E2.7	mRNA	-1.2147	5.07642e-116
191243	ZK218.1	mRNA	1.54862	1.65159e-06
171607	mex-3	mRNA	-1.75058	0
189354	Y4C6A.3	mRNA	-1.93578	9.90069e-37
182803	C18H7.4	mRNA	-1.03807	3.95529e-15
180636	ZK813.1	mRNA	-3.77788	0
176449	tbx-9	mRNA	-2.92554	2.48916e-24
182513	gpx-3	mRNA	1.16301	3.90973e-31
174373	puf-5	mRNA	-2.89345	0
6418714	D1086.18	mRNA	-1.59021	1.25362e-06
3564948	F30A10.12	mRNA	-1.27144	6.44515e-07
183217	C34F11.2	mRNA	-1.18539	2.09427e-18
176667	pie-1	mRNA	-1.48534	9.77153e-117
13189130	R74.10	mRNA	2.44508	4.54086e-06
27307934	F54F7.14	mRNA	-3.88753	0.000763087
183612	C49F5.3	mRNA	-2.87168	3.98797e-23
186617	chpf-2	mRNA	1.07833	0.000436408
187889	ttr-28	mRNA	1.75255	4.96997e-21
176236	ztf-1	mRNA	-1.0912	6.13857e-42
179293	F21C10.11	mRNA	-1.58123	0.0008206
178712	pud-4	mRNA	-2.5656	6.62829e-06
177333	B0273.1	mRNA	-1.39041	4.58663e-25
177032	C45G7.4	mRNA	1.25701	8.82095e-14
186603	F59C6.3	mRNA	-1.00834	4.18553e-05
173982	K05F1.9	mRNA	-1.24292	2.01946e-52
186057	ubc-24	mRNA	-1.54456	3.47361e-05
180634	ZK813.3	mRNA	-3.99594	9.50843e-276
3565477	F22F4.5	mRNA	-2.37388	7.15823e-07
186613	asp-7	mRNA	3.43155	8.05726e-13
185258	F35B12.3	mRNA	2.02338	2.75489e-112
191366	ZK622.1	mRNA	-1.5374	4.19199e-14
175322	ser-4	mRNA	1.24594	1.00763e-09
174873	C50E10.1	mRNA	-1.50765	5.89761e-31
182395	C08E3.1	mRNA	2	1.25687e-05
183247	cyp-25A1	mRNA	-2.61891	9.85802e-09
181470	col-184	mRNA	-3.21135	0
182651	C16A11.7	mRNA	-1.24137	7.21697e-18
171698	Y48G8AL.12	mRNA	-1.30639	6.84974e-278
176513	R17.3	mRNA	-1.30916	8.10826e-29
4363001	F30A10.13	mRNA	-5.26444	2.33629e-10
179044	hpo-26	mRNA	1.78553	3.07701e-27
182981	C28D4.4	mRNA	-1.43625	9.71544e-12
184922	F25D1.5	mRNA	1.09132	4.62737e-08
6418648	C29E4.15	mRNA	1.17716	1.24521e-21
191722	nhr-73	mRNA	-1.04087	1.9498e-08
179298	col-10	mRNA	1.52341	0
187311	K11H12.3	mRNA	4.1247	5.2012e-12
175996	B0280.2	mRNA	-1.22239	0.000123666
177832	K07F5.6	mRNA	-1.23483	7.62425e-15
176418	T16G12.8	mRNA	-1.1917	0.000331437
177742	C46C2.5	mRNA	-2.88194	5.37525e-08
173285	best-8	mRNA	1.4619	1.29945e-17
184790	slc-17.5	mRNA	1.15457	8.15275e-37
172787	C41G7.6	mRNA	-1.53865	1.68045e-47
178382	F55B11.2	mRNA	-3.26805	0
174990	E01G4.6	mRNA	-1.0248	0
171983	F47B3.7	mRNA	-1.92739	8.16522e-51
188839	T24C2.2	mRNA	-2.8413	0.000269831
172464	dhp-1	mRNA	1.51401	1.37258e-137
3565195	Y57G11C.48	mRNA	-1.38995	0.000327623
190716	Y75B12B.1	mRNA	-2.02548	9.28232e-111
177262	E03H12.5	mRNA	-1.24307	8.88247e-68
177863	msd-1	mRNA	-1.87871	8.17914e-69
171808	Y74C10AR.2	mRNA	-7.93664	3.57414e-08
178767	C04E12.4	mRNA	1.13834	5.47892e-57
182170	nhr-147	mRNA	1.83529	1.61286e-10
177791	trcs-1	mRNA	-1.95825	0
177833	K07F5.8	mRNA	-1.15056	1.4239e-05
176354	C48B4.12	mRNA	-7.78136	1.28618e-09
187266	dod-17	mRNA	1.41688	2.82514e-98
187267	K10D11.2	mRNA	3.64943	8.00544e-44
180609	fax-1	mRNA	1.57469	0.000274445
176076	fbn-1	mRNA	1.92683	0
176243	F44E2.4	mRNA	1.03078	4.49361e-269
3565089	Y58A7A.4	mRNA	1.71049	2.65068e-10
186453	F57F4.1	mRNA	-1.15266	5.49279e-18
171932	jmjc-1	mRNA	1.01861	3.21903e-33
181621	nhr-91	mRNA	1.22734	2.0846e-29
171908	W05F2.3	mRNA	-2.43072	0
353461	col-96	mRNA	-2.25883	6.23615e-127
188422	nas-21	mRNA	-3.72247	4.839e-09
185655	F42A9.7	mRNA	-1.18001	1.70842e-16
175473	C14B1.2	mRNA	-1.34072	9.64363e-55
177991	Y69E1A.1	mRNA	-1.54613	9.0177e-113
187804	R11D1.3	mRNA	1.26376	5.55533e-11
174343	acp-2	mRNA	-1.28951	3.00217e-18
187239	col-49	mRNA	-1.74648	0
180505	ceh-39	mRNA	-1.3265	8.12152e-10
177834	ssp-10	mRNA	-1.51982	2.64164e-61
182956	C27B7.6	mRNA	-1.42509	3.1824e-19
178983	dhs-16	mRNA	1.19547	4.22147e-10
191220	ZK105.1	mRNA	-1.95861	1.00021e-70
179189	catp-3	mRNA	1.47727	6.93974e-235
180206	hmit-1.2	mRNA	-1.06374	1.26323e-28
3565593	Y50D4B.6	mRNA	1.59984	2.14112e-16
3565827	C01G12.9	mRNA	-1.32439	9.9567e-08
191142	ZC317.6	mRNA	-1.30447	1.50462e-21
178684	comt-5	mRNA	1.4769	4.24128e-14
36312789	F54D8.10	mRNA	-1.55328	0.00072755
190367	Y57G11B.3	mRNA	-1.07442	0.000232198
172989	C35E7.5	mRNA	-3.16993	3.58351e-11
181634	R03A10.5	mRNA	-1.11563	6.98196e-22
186582	clec-206	mRNA	-1.43397	7.76388e-19
178245	dod-24	mRNA	3.11937	0
180093	cyp-37B1	mRNA	-4.06609	2.45055e-37
187941	irld-14	mRNA	-1.01289	1.45296e-06
183472	C45E5.4	mRNA	1.40585	2.85274e-25
176792	T05D4.5	mRNA	-1.29685	1.19114e-21
6418630	M03A1.8	mRNA	1.49114	1.84914e-06
172700	F55H12.5	mRNA	-1.74526	8.62825e-40
175648	msd-4	mRNA	-1.47656	3.29438e-105
191294	ZK354.7	mRNA	-1.47952	7.2902e-20
184948	F26A1.8	mRNA	2.79355	3.51629e-06
191428	ZK813.2	mRNA	-4.1996	1.08386e-94
189332	W10C8.4	mRNA	1.36484	1.95619e-06
188775	T23B3.6	mRNA	1.35879	0.000174155
174865	tag-276	mRNA	-4.08746	0.000126339
185810	F45F2.11	mRNA	-1.15891	1.95902e-97
179288	hsp-16.49	mRNA	1.62383	1.34538e-167
172709	F53B6.4	mRNA	-1.44706	6.84167e-88
177662	mpst-5	mRNA	-1.53066	4.10577e-20
175108	dhs-8	mRNA	1.75576	2.00154e-29
177332	puf-7	mRNA	-1.96824	2.39176e-269
6418744	F53F4.18	mRNA	-1.76789	0.000178115
174383	chhy-1	mRNA	-1.04476	3.07489e-08
189814	Y41C4A.32	mRNA	1.1861	1.75624e-69
190180	Y51H7C.13	mRNA	-1.60926	0
175611	T23F11.2	mRNA	-1.07727	2.35682e-22
172001	R12E2.14	mRNA	-1.05807	3.24181e-50
182794	C18G1.1	mRNA	1.46445	2.16921e-09
3565831	bus-17	mRNA	1.11189	6.40878e-14
179816	F32H5.3	mRNA	-1.63769	0.00055248
178247	dod-22	mRNA	3.4805	1.061e-207
174603	gpd-1	mRNA	-1.6123	7.94236e-306
181418	abf-6	mRNA	1.47006	3.56616e-32
189739	Y39B6A.29	mRNA	1.41504	1.6774e-07
182210	C04E12.5	mRNA	2.51502	1.84903e-26
183967	D2096.9	mRNA	1.0902	0.000547039
189976	wht-8	mRNA	-1.06722	2.94618e-15
177030	Y38F2AR.10	mRNA	-1.22151	1.32814e-08
191200	ZC581.2	mRNA	-1.04363	3.96187e-11
27219624	F59H6.15	mRNA	-1.42288	2.34332e-05
174896	Y38E10A.14	mRNA	1.60239	6.94705e-63
13218867	F26F2.10	mRNA	-1.21942	1.03632e-07
183746	nep-4	mRNA	-3.1412	6.36508e-35
187608	R05D8.7	mRNA	1.27271	9.91787e-06
178200	T04A11.5	mRNA	1.28353	8.20079e-08
181476	R01E6.5	mRNA	-1.28771	1.48226e-07
179660	gana-1	mRNA	1.65967	4.94432e-130
179277	F59E11.7	mRNA	1.3409	1.80542e-07
187086	K07A12.5	mRNA	-1.09084	1.64923e-15
175342	dpy-1	mRNA	3.01615	4.62407e-302
177071	dml-1	mRNA	-1.15559	1.54883e-06
176408	K03H1.7	mRNA	-1.38733	8.10142e-10
176171	F10E9.2	mRNA	-1.27854	4.57849e-09
179250	ZC190.7	mRNA	-1.14324	3.42844e-06
3565642	Y87G2A.16	mRNA	1.01902	4.35571e-11
187016	K04H8.3	mRNA	-6.33985	0.000183949
178024	nhr-67	mRNA	1.24311	0.000255347
185993	F48G7.4	mRNA	1.31288	3.43541e-08
184373	cal-8	mRNA	1.09986	0.000547115
180248	Y39B6A.30	mRNA	-1.08496	1.78611e-33
187410	nhr-203	mRNA	1.17019	2.5745e-22
174923	snf-5	mRNA	-1.41965	1.93877e-102
182405	C08E3.13	mRNA	1.56281	9.23039e-11
178373	F02H6.3	mRNA	-3.16993	1.54935e-26
182246	C05B5.4	mRNA	2.4746	4.27436e-09
191495	nhr-244	mRNA	6.74147	0.000284326
172219	cey-2	mRNA	-1.49455	0
191606	acr-23	mRNA	1.62189	1.18614e-10
176645	Y75B8A.6	mRNA	1.01191	7.19878e-16
3565396	Y57G11C.46	mRNA	-1.96347	0.000138319
3565467	F22D6.15	mRNA	1.3127	1.31676e-09
186376	cex-1	mRNA	-1.188	5.3601e-09
179928	F40G12.11	mRNA	-4.05952	2.60498e-52
186308	F55D12.1	mRNA	1.04683	4.31824e-06
172694	F36A2.10	mRNA	-1.5099	3.10732e-54
177066	Y54G2A.15	mRNA	-1.43581	5.77602e-12
181290	col-177	mRNA	1.16439	2.26648e-05
177341	C39H7.1	mRNA	-1.46552	1.49748e-108
177949	efn-2	mRNA	1.14198	1.01648e-27
172336	ZC308.4	mRNA	-2.86147	5.85036e-135
173477	fbxc-40	mRNA	1.35954	0.000479035
189918	Y45F10B.8	mRNA	1.49825	0.000410173
189080	W01B6.3	mRNA	2.05063	2.12686e-08
177268	T28H11.7	mRNA	-1.22878	2.94946e-33
4926970	K12C11.5	mRNA	-1.26176	6.54019e-05
259343	ZC116.1	mRNA	1.53565	1.34452e-58
182081	C01G10.4	mRNA	2.42389	1.92378e-44
180981	pgp-10	mRNA	1.20457	2.31174e-35
189987	Y47D7A.11	mRNA	-8.75822	6.24998e-12
176294	ZK512.8	mRNA	-1.25003	2.1443e-24
4363080	K11H12.11	mRNA	2.31389	5.99083e-14
6418857	F59C12.4	mRNA	3.24413	0.000273605
178372	R05A10.1	mRNA	2.73697	4.84758e-09
29991190	F27D9.13	mRNA	1.79458	3.54759e-08
191467	ZK938.1	mRNA	-1.50865	7.8032e-106
188467	lips-11	mRNA	3.85757	2.45459e-85
179681	ssp-35	mRNA	-1.14465	3.83253e-19
259721	F09B9.5	mRNA	1.07938	0.000893236
171813	ssp-19	mRNA	-2.20436	4.21746e-11
188139	T05F1.9	mRNA	1.72394	2.6302e-08
185350	F36D1.8	mRNA	-2.74522	2.69194e-17
173890	msp-50	mRNA	-1.38564	2.53425e-97
179289	hsp-16.11	mRNA	1.67368	1.49588e-228
190139	Y51B9A.6	mRNA	1.69515	3.57941e-12
25502968	BE0003N10.6	mRNA	-2.89547	7.74511e-79
259316	K06A5.2	mRNA	-1.1285	1.22032e-86
172963	fkb-7	mRNA	1.30384	7.11587e-24
180902	col-166	mRNA	1.89369	0
190470	fbxb-101	mRNA	4.71425	8.30263e-14
181050	C39D10.7	mRNA	-3.67345	0
188443	fbxa-11	mRNA	1.21118	1.27796e-06
177703	oma-1	mRNA	-1.69068	1.81538e-195
181099	dpy-6	mRNA	2.1367	0
172533	gna-2	mRNA	-1.87277	2.79383e-121
184831	F22E5.1	mRNA	1.47749	7.2188e-104
185262	sra-14	mRNA	-3.24101	9.77785e-06
177493	C42D4.2	mRNA	-1.19444	1.93527e-30
177809	C28D4.5	mRNA	-1.18087	4.04929e-23
174328	gei-14	mRNA	-1.04312	1.05927e-64
175402	H34I24.1	mRNA	-1.4246	8.00625e-11
185197	F32B5.3	mRNA	-2.47805	0.00053293
178836	F32D1.7	mRNA	-1.92995	2.94137e-112
177305	msp-19	mRNA	-1.44171	0
188073	ugt-56	mRNA	1.19898	0.00017933
182495	C10C6.3	mRNA	-1.0533	5.54725e-07
174334	eff-1	mRNA	1.04705	1.6145e-34
178521	clec-197	mRNA	-3	4.38928e-06
189943	clec-174	mRNA	1.25014	8.4199e-06
191146	dao-4	mRNA	-1.09269	2.88382e-100
178092	ttr-50	mRNA	-4.06158	2.51173e-26
172592	K04G2.10	mRNA	-4	9.27373e-08
191473	ZK970.7	mRNA	3.63148	2.56109e-80
185402	F36H12.17	mRNA	-2.84276	1.14087e-09
172736	clec-91	mRNA	-2.553	5.3359e-176
181691	F09C8.1	mRNA	-1.14022	4.05912e-30
177399	bli-6	mRNA	-1.47043	0
182567	C13C4.6	mRNA	1.06522	1.10044e-06
177329	rme-2	mRNA	-2.45281	0
180624	dhs-26	mRNA	-3.22239	5.53191e-06
174104	C18H9.5	mRNA	1.26649	1.63204e-16
13217259	T10C6.15	mRNA	1.1375	0.000815504
182676	C16C8.9	mRNA	-6.90689	0.000183976
181009	lgc-11	mRNA	2.01707	2.4324e-07
353397	F13H8.12	mRNA	-1.02074	0.000536984
176305	T02C1.1	mRNA	-1.17203	8.04452e-05
181277	pgp-8	mRNA	1.38857	2.05414e-10
187863	R13D11.4	mRNA	1.02825	5.84517e-11
7040133	D1081.12	mRNA	-1.2127	3.77491e-12
179182	F43H9.4	mRNA	1.50144	6.74665e-88
177877	spch-1	mRNA	-1.10977	1.26338e-112
260109	msd-2	mRNA	-1.82884	8.06451e-125
177630	F17E9.4	mRNA	-3.29284	3.84396e-176
180059	nhr-60	mRNA	1.22239	3.56048e-06
191723	nhr-74	mRNA	4.1672	0
187531	R02F11.2	mRNA	1.03728	0.000672043
175689	C45G9.4	mRNA	-1.05857	1.19776e-21
177282	snpn-1	mRNA	-1.12962	3.38891e-15
185761	F44G4.5	mRNA	-1.33859	1.60505e-10
171627	rnp-8	mRNA	-1.06244	1.36088e-143
4363056	T24C4.8	mRNA	7.40939	1.34649e-06
177965	cyb-1	mRNA	-1.15219	7.77265e-303
172670	egg-6	mRNA	-1.05336	2.1921e-176
24104247	C25E10.17	mRNA	-2.1008	0.000934173
177019	nsy-4	mRNA	1.23274	1.92454e-44
182927	nhr-258	mRNA	1.86507	0.000357334
184239	grd-10	mRNA	1.39722	4.32944e-35
172987	C35E7.9	mRNA	-1.30719	7.63776e-30
175408	Y55D5A.1	mRNA	1.1866	1.01871e-14
13224282	K09A9.8	mRNA	-7.83289	2.6151e-05
6418629	K10H10.12	mRNA	1.33811	0.000587477
3565336	aqp-9	mRNA	1.01136	2.86415e-10
259683	Y113G7A.16	mRNA	3.0742	3.86703e-08
178067	gfat-2	mRNA	-2.42325	0
177144	zag-1	mRNA	1.10878	1.17913e-12
178023	C08F8.3	mRNA	-1.15669	1.83615e-46
177966	ssp-34	mRNA	-1.53599	3.33097e-35
182852	acd-1	mRNA	-1.57491	1.25385e-06
174817	Y6D1A.2	mRNA	1.76604	7.24234e-11
259461	T01E8.8	mRNA	-1.81185	1.51581e-37
191364	lips-6	mRNA	2.90357	9.75849e-11
6418662	Y49E10.29	mRNA	-2.66658	2.42614e-55
187164	K08F4.5	mRNA	-1.29978	1.02909e-19
188420	nas-20	mRNA	-3.23396	1.89332e-148
3565542	F52F12.8	mRNA	-1.65778	1.03737e-06
187833	R11H6.4	mRNA	-1.90574	2.79649e-19
190671	pqn-90	mRNA	-6.35755	1.83816e-08
3565677	F11E6.9	mRNA	1.26748	2.79638e-24
179220	F38E1.3	mRNA	-1.04947	5.84199e-08
177827	msp-81	mRNA	-1.38372	0
174498	kin-15	mRNA	1.37501	1.91814e-33
176282	lin-12	mRNA	1.12832	1.55769e-21
188388	T10G3.1	mRNA	1.23991	8.42135e-06
183202	dmd-10	mRNA	1.4991	0.000354889
182960	nhr-259	mRNA	1.43561	4.12548e-10
184926	nhr-141	mRNA	1.11658	0.000196101
179480	T21C9.13	mRNA	-2.05298	1.96686e-71
[truncated: 80 more rows]

## Sheet: GO_Enrichment
Gene ID	Gene Symbol	Type	GO_CFP Term	GO_CFP Term Level1	GO_CFP Term Level2
180646	vit-4	mRNA	[Cellular Component]---GO:0005576///extracellular region+++[Molecular Function]---GO:0045735///nutrient reservoir activity+++GO:0005319///lipid transporter activity+++[Biological Process]---GO:0006869///lipid transport	cellular_component+++molecular_function+++biological_process	[Cellular Component]---extracellular region+++[Molecular Function]---transporter activity+++nutrient reservoir activity+++[Biological Process]---localization
188646	T20D4.10	mRNA	[Cellular Component]---GO:0005576///extracellular region	cellular_component	[Cellular Component]---extracellular region
181858	pitr-3	mRNA	[Cellular Component]---GO:0016021///integral component of membrane+++GO:0005887///integral component of plasma membrane+++GO:0016020///membrane+++[Molecular Function]---GO:0005315///inorganic phosphate transmembrane transporter activity+++GO:0015319///sodium:inorganic phosphate symporter activity+++[Biological Process]---GO:0006817///phosphate ion transport+++GO:0035725///sodium ion transmembrane…	cellular_component+++molecular_function+++biological_process	[Cellular Component]---cell part+++membrane part+++cell+++membrane+++[Molecular Function]---transporter activity+++[Biological Process]---localization
6418843	ttr-34	mRNA	[Cellular Component]---GO:0005615///extracellular space	cellular_component	[Cellular Component]---extracellular region part+++extracellular region
189897	ttr-13	mRNA	[Cellular Component]---GO:0005615///extracellular space	cellular_component	[Cellular Component]---extracellular region part+++extracellular region
187666	acs-15	mRNA	[Molecular Function]---GO:0003824///catalytic activity+++[Biological Process]---GO:0008152///metabolic process	molecular_function+++biological_process	[Molecular Function]---catalytic activity+++[Biological Process]---metabolic process
185573	hst-3.1	mRNA	[Cellular Component]---GO:0005796///Golgi lumen+++[Molecular Function]---GO:0008467///[heparan sulfate]-glucosamine 3-sulfotransferase 1 activity+++GO:0008146///sulfotransferase activity+++GO:0016740///transferase activity+++[Biological Process]---GO:0015012///heparan sulfate proteoglycan biosynthetic process	cellular_component+++molecular_function+++biological_process	[Cellular Component]---organelle+++cell part+++membrane-enclosed lumen+++cell+++organelle part+++[Molecular Function]---catalytic activity+++[Biological Process]---cellular process+++metabolic process
187892	R102.6	mRNA	[Cellular Component]---GO:0016021///integral component of membrane+++GO:0016020///membrane	cellular_component	[Cellular Component]---membrane part+++membrane
177290	C24D10.2	mRNA	[Cellular Component]---GO:0016021///integral component of membrane+++GO:0016020///membrane+++[Molecular Function]---GO:0005515///protein binding	cellular_component+++molecular_function	[Cellular Component]---membrane part+++membrane+++[Molecular Function]---binding
189802	Y40H7A.3	mRNA	[Cellular Component]---GO:0016021///integral component of membrane+++GO:0016020///membrane	cellular_component	[Cellular Component]---membrane part+++membrane
172323	oac-9	mRNA	[Cellular Component]---GO:0016021///integral component of membrane+++GO:0016020///membrane+++[Molecular Function]---GO:0016746///transferase activity, transferring acyl groups+++GO:0016747///transferase activity, transferring acyl groups other than amino-acyl groups+++GO:0016740///transferase activity	cellular_component+++molecular_function	[Cellular Component]---membrane part+++membrane+++[Molecular Function]---catalytic activity
180418	ncam-1	mRNA	[Cellular Component]---GO:0030424///axon+++GO:0016021///integral component of membrane+++GO:0005886///plasma membrane+++GO:0016020///membrane+++[Molecular Function]---GO:0098632///cell-cell adhesion mediator activity+++[Biological Process]---GO:0070593///dendrite self-avoidance+++GO:0007155///cell adhesion+++GO:0007156///homophilic cell adhesion via plasma membrane adhesion molecules+++GO:0007411…	cellular_component+++molecular_function+++biological_process	[Cellular Component]---cell part+++membrane part+++cell+++membrane+++[Molecular Function]---binding+++[Biological Process]---developmental process+++cellular process+++multicellular organismal process+++cellular component organization or biogenesis+++response to stimulus+++biological adhesion+++locomotion
186889	K02E7.10	mRNA	[Cellular Component]---GO:0005615///extracellular space+++GO:0016021///integral component of membrane+++GO:0005764///lysosome+++GO:0016020///membrane+++[Molecular Function]---GO:0004197///cysteine-type endopeptidase activity+++GO:0008234///cysteine-type peptidase activity+++[Biological Process]---GO:0006508///proteolysis+++GO:0051603///proteolysis involved in cellular protein catabolic process	cellular_component+++molecular_function+++biological_process	[Cellular Component]---extracellular region part+++organelle+++cell part+++membrane part+++extracellular region+++membrane+++cell+++[Molecular Function]---catalytic activity+++[Biological Process]---cellular process+++metabolic process
186146	F53A9.7	mRNA	[Biological Process]---GO:0097501///stress response to metal ion	biological_process	[Biological Process]---response to stimulus
172608	sre-23	mRNA	[Cellular Component]---GO:0016021///integral component of membrane+++GO:0016020///membrane+++[Biological Process]---GO:0007606///sensory perception of chemical stimulus	cellular_component+++biological_process	[Cellular Component]---membrane part+++membrane+++[Biological Process]---multicellular organismal process
178688	clec-207	mRNA	[Molecular Function]---GO:0030246///carbohydrate binding	molecular_function	[Molecular Function]---binding
178205	ham-1	mRNA	[Cellular Component]---GO:0005938///cell cortex+++GO:0005634///nucleus+++GO:0005737///cytoplasm+++[Molecular Function]---GO:0001228///DNA-binding transcription activator activity, RNA polymerase II-specific+++[Biological Process]---GO:1990179///protein localization to actomyosin contractile ring+++GO:0006357///regulation of transcription by RNA polymerase II+++GO:0051653///spindle localization+++…	cellular_component+++molecular_function+++biological_process	[Cellular Component]---organelle+++cell part+++cell+++[Molecular Function]---transcription regulator activity+++[Biological Process]---positive regulation of biological process+++developmental process+++multicellular organismal process+++cellular process+++biological regulation+++metabolic process+++regulation of biological process+++cell proliferation+++localization+++locomotion
178320	puf-3	mRNA	[Cellular Component]---GO:0000932///P-body+++GO:0005737///cytoplasm+++GO:0043186///P granule+++[Molecular Function]---GO:0003723///RNA binding+++GO:0003730///mRNA 3'-UTR binding+++GO:0005515///protein binding+++[Biological Process]---GO:0006417///regulation of translation+++GO:0040019///positive regulation of embryonic development+++GO:0007275///multicellular organism development+++GO:0007049///c…	cellular_component+++molecular_function+++biological_process	[Cellular Component]---protein-containing complex+++organelle+++cell part+++cell+++[Molecular Function]---binding+++[Biological Process]---reproduction+++multi-organism process+++positive regulation of biological process+++developmental process+++multicellular organismal process+++cellular process+++biological regulation+++metabolic process+++reproductive process+++regulation of biological process
185238	F33H2.8	mRNA	[Cellular Component]---GO:0016021///integral component of membrane+++GO:0016020///membrane	cellular_component	[Cellular Component]---membrane part+++membrane
186264	F54H5.3	mRNA	[Cellular Component]---GO:0005856///cytoskeleton+++GO:0005789///endoplasmic reticulum membrane	cellular_component	[Cellular Component]---organelle+++cell part+++membrane part+++cell+++membrane+++organelle part
174102	ift-74	mRNA	[Cellular Component]---GO:0005929///cilium+++GO:0031514///motile cilium+++GO:0030992///intraciliary transport particle B+++GO:0005813///centrosome+++[Molecular Function]---GO:0048487///beta-tubulin binding+++[Biological Process]---GO:0060271///cilium assembly+++GO:0042073///intraciliary transport	cellular_component+++molecular_function+++biological_process	[Cellular Component]---protein-containing complex+++organelle+++cell part+++cell+++organelle part+++[Molecular Function]---binding+++[Biological Process]---cellular process+++cellular component organization or biogenesis+++localization
175565	ckb-2	mRNA	[Molecular Function]---GO:0000166///nucleotide binding+++GO:0004103///choline kinase activity+++GO:0016740///transferase activity+++GO:0005524///ATP binding+++GO:0016301///kinase activity+++[Biological Process]---GO:0006656///phosphatidylcholine biosynthetic process+++GO:0016310///phosphorylation+++GO:0008654///phospholipid biosynthetic process+++GO:0006629///lipid metabolic process+++GO:0030968/…	molecular_function+++biological_process	[Molecular Function]---binding+++catalytic activity+++[Biological Process]---cellular process+++signaling+++biological regulation+++metabolic process+++regulation of biological process+++response to stimulus
176596	faah-6	mRNA	[Molecular Function]---GO:0016787///hydrolase activity+++GO:0004040///amidase activity	molecular_function	[Molecular Function]---catalytic activity
176096	ceh-23	mRNA	[Cellular Component]---GO:0005634///nucleus+++[Molecular Function]---GO:0003677///DNA binding+++GO:0043565///sequence-specific DNA binding+++[Biological Process]---GO:0006355///regulation of transcription, DNA-templated+++GO:0008340///determination of adult lifespan+++GO:0007275///multicellular organism development+++GO:1904081///positive regulation of transcription from RNA polymerase II promote…	cellular_component+++molecular_function+++biological_process	[Cellular Component]---organelle+++cell part+++cell+++[Molecular Function]---binding+++[Biological Process]---positive regulation of biological process+++developmental process+++multicellular organismal process+++cellular process+++biological regulation+++metabolic process+++regulation of biological process
181272	ttr-14	mRNA	[Cellular Component]---GO:0005615///extracellular space	cellular_component	[Cellular Component]---extracellular region part+++extracellular region
176721	col-97	mRNA	[Cellular Component]---GO:0016021///integral component of membrane+++GO:0005581///collagen trimer+++GO:0016020///membrane+++[Molecular Function]---GO:0042302///structural constituent of cuticle+++[Biological Process]---GO:0040002///collagen and cuticulin-based cuticle development	cellular_component+++molecular_function+++biological_process	[Cellular Component]---protein-containing complex+++membrane part+++membrane+++[Molecular Function]---structural molecule activity+++[Biological Process]---developmental process+++multicellular organismal process
172495	col-62	mRNA	[Cellular Component]---GO:0016021///integral component of membrane+++GO:0005581///collagen trimer+++GO:0016020///membrane+++[Molecular Function]---GO:0042302///structural constituent of cuticle	cellular_component+++molecular_function	[Cellular Component]---protein-containing complex+++membrane part+++membrane+++[Molecular Function]---structural molecule activity
183598	clec-198	mRNA	[Molecular Function]---GO:0030246///carbohydrate binding	molecular_function	[Molecular Function]---binding
188356	cyp-13A5	mRNA	[Cellular Component]---GO:0016021///integral component of membrane+++[Molecular Function]---GO:0046872///metal ion binding+++GO:0020037///heme binding+++GO:0005506///iron ion binding+++GO:0016491///oxidoreductase activity+++GO:0004497///monooxygenase activity+++GO:0016705///oxidoreductase activity, acting on paired donors, with incorporation or reduction of molecular oxygen+++[Biological Process]…	cellular_component+++molecular_function+++biological_process	[Cellular Component]---membrane part+++membrane+++[Molecular Function]---binding+++catalytic activity+++[Biological Process]---metabolic process
185308	F35F10.1	mRNA	[Cellular Component]---GO:0005634///nucleus+++GO:0005737///cytoplasm+++GO:0005829///cytosol+++[Molecular Function]---GO:0000224///peptide-N4-(N-acetyl-beta-glucosaminyl)asparagine amidase activity+++[Biological Process]---GO:0006516///glycoprotein catabolic process+++GO:0006515///protein quality control for misfolded or incompletely synthesized proteins+++GO:0006517///protein deglycosylation	cellular_component+++molecular_function+++biological_process	[Cellular Component]---organelle+++cell part+++cell+++[Molecular Function]---catalytic activity+++[Biological Process]---cellular process+++metabolic process
3565987	Y102A5C.36	mRNA	[Cellular Component]---GO:0048471///perinuclear region of cytoplasm+++GO:0044214///spanning component of plasma membrane+++GO:0005634///nucleus+++GO:0005737///cytoplasm+++GO:0005886///plasma membrane+++GO:0016021///integral component of membrane+++[Molecular Function]---GO:0004888///transmembrane signaling receptor activity+++GO:0038023///signaling receptor activity+++[Biological Process]---GO:00…	cellular_component+++molecular_function+++biological_process	[Cellular Component]---organelle+++cell part+++membrane part+++membrane+++cell+++[Molecular Function]---molecular transducer activity+++[Biological Process]---reproduction+++multi-organism process+++developmental process+++cellular process+++multicellular organismal process+++reproductive process
176469	F43D9.1	mRNA	[Cellular Component]---GO:0016021///integral component of membrane+++GO:0005813///centrosome+++GO:0016020///membrane	cellular_component	[Cellular Component]---organelle+++cell part+++membrane part+++membrane+++cell+++organelle part
173127	ssp-37	mRNA	[Biological Process]---GO:0050829///defense response to Gram-negative bacterium	biological_process	[Biological Process]---multi-organism process+++response to stimulus
181000	clc-5	mRNA	[Cellular Component]---GO:0016021///integral component of membrane+++GO:0005886///plasma membrane+++GO:0016020///membrane+++[Molecular Function]---GO:0003674///molecular_function+++[Biological Process]---GO:0008150///biological_process	cellular_component+++molecular_function+++biological_process	[Cellular Component]---cell part+++membrane part+++cell+++membrane+++[Molecular Function]---molecular_function+++[Biological Process]---biological_process
176085	cdh-3	mRNA	[Cellular Component]---GO:0005604///basement membrane+++GO:0016323///basolateral plasma membrane+++GO:0016021///integral component of membrane+++GO:0005886///plasma membrane+++GO:0005887///integral component of plasma membrane+++GO:0005737///cytoplasm+++GO:0030054///cell junction+++GO:0016020///membrane+++[Molecular Function]---GO:0046872///metal ion binding+++GO:0005198///structural molecule act…	cellular_component+++molecular_function+++biological_process	[Cellular Component]---extracellular region part+++cell part+++membrane part+++extracellular region+++cell junction+++membrane+++cell+++[Molecular Function]---binding+++structural molecule activity+++[Biological Process]---reproduction+++developmental process+++cellular process+++multicellular organismal process+++reproductive process+++cellular component organization or biogenesis+++biological a…
3564810	picc-1	mRNA	[Cellular Component]---GO:0005912///adherens junction+++GO:0030054///cell junction+++[Molecular Function]---GO:0005515///protein binding	cellular_component+++molecular_function	[Cellular Component]---cell junction+++[Molecular Function]---binding
177310	ZK354.2	mRNA	[Cellular Component]---GO:0031143///pseudopodium+++GO:0005856///cytoskeleton+++GO:0005737///cytoplasm+++[Molecular Function]---GO:0004672///protein kinase activity+++GO:0005524///ATP binding+++[Biological Process]---GO:0018107///peptidyl-threonine phosphorylation+++GO:0018105///peptidyl-serine phosphorylation+++GO:0006468///protein phosphorylation	cellular_component+++molecular_function+++biological_process	[Cellular Component]---organelle+++cell part+++cell+++[Molecular Function]---binding+++catalytic activity+++[Biological Process]---cellular process+++metabolic process
184883	daf-10	mRNA	[Cellular Component]---GO:0005929///cilium+++GO:0042995///cell projection+++GO:0030991///intraciliary transport particle A+++GO:0036064///ciliary basal body+++[Biological Process]---GO:0006935///chemotaxis+++GO:0060271///cilium assembly+++GO:0061066///positive regulation of dauer larval development+++GO:0035721///intraciliary retrograde transport+++GO:0046626///regulation of insulin receptor sign…	cellular_component+++biological_process	[Cellular Component]---protein-containing complex+++organelle+++cell part+++cell+++organelle part+++[Biological Process]---positive regulation of biological process+++developmental process+++multicellular organismal process+++cellular process+++signaling+++biological regulation+++regulation of biological process+++cellular component organization or biogenesis+++response to stimulus+++localization…
177285	tkr-3	mRNA	[Cellular Component]---GO:0016021///integral component of membrane+++GO:0016020///membrane+++[Molecular Function]---GO:0004930///G protein-coupled receptor activity+++GO:0004983///neuropeptide Y receptor activity+++[Biological Process]---GO:0007218///neuropeptide signaling pathway+++GO:0007186///G protein-coupled receptor signaling pathway	cellular_component+++molecular_function+++biological_process	[Cellular Component]---membrane part+++membrane+++[Molecular Function]---molecular transducer activity+++[Biological Process]---cellular process+++signaling+++biological regulation+++regulation of biological process+++response to stimulus
189842	Y42H9AR.2	mRNA	[Cellular Component]---GO:0016021///integral component of membrane+++GO:0016020///membrane	cellular_component	[Cellular Component]---membrane part+++membrane
189878	dmd-3	mRNA	[Cellular Component]---GO:0005634///nucleus+++[Molecular Function]---GO:0046872///metal ion binding+++GO:0003700///DNA-binding transcription factor activity+++GO:0003677///DNA binding+++GO:0043565///sequence-specific DNA binding+++[Biological Process]---GO:0006355///regulation of transcription, DNA-templated+++GO:0045138///nematode male tail tip morphogenesis+++GO:0010628///positive regulation of…	cellular_component+++molecular_function+++biological_process	[Cellular Component]---organelle+++cell part+++cell+++[Molecular Function]---transcription regulator activity+++binding+++[Biological Process]---reproduction+++developmental process+++positive regulation of biological process+++multicellular organismal process+++cellular process+++biological regulation+++metabolic process+++reproductive process+++regulation of biological process
189764	Y39G8B.5	mRNA	[Cellular Component]---GO:0005737///cytoplasm+++[Molecular Function]---GO:0004674///protein serine/threonine kinase activity+++GO:0004672///protein kinase activity+++GO:0005524///ATP binding+++[Biological Process]---GO:0018107///peptidyl-threonine phosphorylation+++GO:0018105///peptidyl-serine phosphorylation+++GO:0006468///protein phosphorylation	cellular_component+++molecular_function+++biological_process	[Cellular Component]---cell part+++cell+++[Molecular Function]---binding+++catalytic activity+++[Biological Process]---cellular process+++metabolic process
188846	T24C4.5	mRNA	[Cellular Component]---GO:0005658///alpha DNA polymerase:primase complex+++[Molecular Function]---GO:0003896///DNA primase activity+++GO:0003697///single-stranded DNA binding+++GO:0016740///transferase activity+++GO:0003899///DNA-directed 5'-3' RNA polymerase activity+++[Biological Process]---GO:0006269///DNA replication, synthesis of RNA primer+++GO:0006260///DNA replication	cellular_component+++molecular_function+++biological_process	[Cellular Component]---protein-containing complex+++organelle+++cell part+++membrane-enclosed lumen+++cell+++organelle part+++[Molecular Function]---binding+++catalytic activity+++[Biological Process]---cellular process+++metabolic process
177277	R13H9.6	mRNA	[Cellular Component]---GO:0005737///cytoplasm+++GO:0005634///nucleus+++[Molecular Function]---GO:0004672///protein kinase activity+++GO:0005524///ATP binding+++[Biological Process]---GO:0018107///peptidyl-threonine phosphorylation+++GO:0018105///peptidyl-serine phosphorylation+++GO:0006468///protein phosphorylation	cellular_component+++molecular_function+++biological_process	[Cellular Component]---organelle+++cell part+++cell+++[Molecular Function]---binding+++catalytic activity+++[Biological Process]---cellular process+++metabolic process
176471	sip-1	mRNA	[Cellular Component]---GO:0005829///cytosol+++[Molecular Function]---GO:0051082///unfolded protein binding+++[Biological Process]---GO:0008340///determination of adult lifespan+++GO:0019538///protein metabolic process+++GO:0009792///embryo development ending in birth or egg hatching+++GO:0009408///response to heat	cellular_component+++molecular_function+++biological_process	[Cellular Component]---cell part+++cell+++[Molecular Function]---binding+++[Biological Process]---developmental process+++multicellular organismal process+++metabolic process+++response to stimulus
188423	nas-22	mRNA	[Cellular Component]---GO:0005576///extracellular region+++[Molecular Function]---GO:0046872///metal ion binding+++GO:0008270///zinc ion binding+++GO:0004222///metalloendopeptidase activity+++GO:0008237///metallopeptidase activity+++GO:0008233///peptidase activity+++GO:0016787///hydrolase activity+++[Biological Process]---GO:0006508///proteolysis+++GO:0018996///molting cycle, collagen and cuticul…	cellular_component+++molecular_function+++biological_process	[Cellular Component]---extracellular region+++[Molecular Function]---binding+++catalytic activity+++[Biological Process]---multicellular organismal process+++metabolic process
175403	F56F11.4	mRNA	[Cellular Component]---GO:0008540///proteasome regulatory particle, base subcomplex+++GO:0031597///cytosolic proteasome complex+++GO:0098794///postsynapse+++GO:0031595///nuclear proteasome complex+++GO:0005737///cytoplasm+++[Molecular Function]---GO:0000166///nucleotide binding+++GO:0016787///hydrolase activity+++GO:0005524///ATP binding+++GO:0017025///TBP-class protein binding+++[Biological Proc…	cellular_component+++molecular_function+++biological_process	[Cellular Component]---synapse part+++protein-containing complex+++organelle+++cell part+++membrane-enclosed lumen+++synapse+++cell+++organelle part+++[Molecular Function]---binding+++catalytic activity+++[Biological Process]---positive regulation of biological process+++cellular process+++signaling+++biological regulation+++metabolic process+++regulation of biological process+++cellular componen…
7040175	E02H4.7	mRNA	[Cellular Component]---GO:0005576///extracellular region	cellular_component	[Cellular Component]---extracellular region
180884	nnt-1	mRNA	[Cellular Component]---GO:0016021///integral component of membrane+++GO:0005739///mitochondrion+++GO:0016020///membrane+++[Molecular Function]---GO:0051287///NAD binding+++GO:0050661///NADP binding+++GO:0008746///NAD(P)+ transhydrogenase activity+++[Biological Process]---GO:0006740///NADPH regeneration+++GO:1902600///proton transmembrane transport+++GO:0055114///oxidation-reduction process	cellular_component+++molecular_function+++biological_process	[Cellular Component]---organelle+++cell part+++membrane part+++membrane+++cell+++[Molecular Function]---binding+++catalytic activity+++[Biological Process]---cellular process+++metabolic process+++localization
187408	nhr-201	mRNA	[Cellular Component]---GO:0005634///nucleus+++[Molecular Function]---GO:0046872///metal ion binding+++GO:0008270///zinc ion binding+++GO:0003700///DNA-binding transcription factor activity+++GO:0003677///DNA binding+++GO:0043565///sequence-specific DNA binding+++[Biological Process]---GO:0006355///regulation of transcription, DNA-templated	cellular_component+++molecular_function+++biological_process	[Cellular Component]---organelle+++cell part+++cell+++[Molecular Function]---transcription regulator activity+++binding+++[Biological Process]---cellular process+++biological regulation+++metabolic process+++regulation of biological process
186083	col-133	mRNA	[Cellular Component]---GO:0016021///integral component of membrane+++GO:0005581///collagen trimer+++GO:0016020///membrane+++[Molecular Function]---GO:0042302///structural constituent of cuticle	cellular_component+++molecular_function	[Cellular Component]---protein-containing complex+++membrane part+++membrane+++[Molecular Function]---structural molecule activity
174501	R09D1.12	mRNA	[Cellular Component]---GO:0016021///integral component of membrane+++GO:0005887///integral component of plasma membrane+++GO:0043235///receptor complex+++GO:0005737///cytoplasm+++GO:0016020///membrane+++[Molecular Function]---GO:0004888///transmembrane signaling receptor activity+++GO:0004713///protein tyrosine kinase activity+++GO:0004714///transmembrane receptor protein tyrosine kinase activity…	cellular_component+++molecular_function+++biological_process	[Cellular Component]---protein-containing complex+++cell part+++membrane part+++membrane+++cell+++[Molecular Function]---binding+++catalytic activity+++molecular transducer activity+++[Biological Process]---developmental process+++positive regulation of biological process+++cellular process+++signaling+++negative regulation of biological process+++biological regulation+++metabolic process+++regul…
182951	C27A7.6	mRNA	[Cellular Component]---GO:0016021///integral component of membrane+++GO:0016020///membrane+++[Biological Process]---GO:0055085///transmembrane transport	cellular_component+++biological_process	[Cellular Component]---membrane part+++membrane+++[Biological Process]---localization
175952	lim-8	mRNA	[Cellular Component]---GO:0031430///M band+++[Molecular Function]---GO:0046872///metal ion binding+++GO:0019904///protein domain specific binding	cellular_component+++molecular_function	[Cellular Component]---supramolecular complex+++organelle+++cell part+++cell+++organelle part+++[Molecular Function]---binding
175586	cpg-1	mRNA	[Cellular Component]---GO:0005576///extracellular region+++GO:0030312///external encapsulating structure+++[Molecular Function]---GO:0008061///chitin binding+++[Biological Process]---GO:0000281///mitotic cytokinesis+++GO:0006030///chitin metabolic process+++GO:0030703///eggshell formation+++GO:0007275///multicellular organism development+++GO:0007049///cell cycle+++GO:0032465///regulation of cyto…	cellular_component+++molecular_function+++biological_process	[Cellular Component]---cell part+++extracellular region+++cell+++[Molecular Function]---binding+++[Biological Process]---reproduction+++multi-organism process+++developmental process+++multicellular organismal process+++cellular process+++biological regulation+++metabolic process+++reproductive process+++regulation of biological process
177844	msp-77	mRNA	[Cellular Component]---GO:0005856///cytoskeleton+++GO:0042995///cell projection+++GO:0031143///pseudopodium+++GO:0005737///cytoplasm+++[Biological Process]---GO:0001556///oocyte maturation+++GO:0045987///positive regulation of smooth muscle contraction+++GO:0043410///positive regulation of MAPK cascade	cellular_component+++biological_process	[Cellular Component]---organelle+++cell part+++cell+++[Biological Process]---reproduction+++multi-organism process+++positive regulation of biological process+++developmental process+++cellular process+++multicellular organismal process+++signaling+++biological regulation+++metabolic process+++reproductive process+++regulation of biological process+++response to stimulus
178380	Y67A10A.9	mRNA	[Cellular Component]---GO:0016021///integral component of membrane+++GO:0016020///membrane	cellular_component	[Cellular Component]---membrane part+++membrane
182009	B0496.6	mRNA	[Cellular Component]---GO:0016021///integral component of membrane+++GO:0016020///membrane	cellular_component	[Cellular Component]---membrane part+++membrane
174340	skpo-1	mRNA	[Cellular Component]---GO:0005615///extracellular space+++[Molecular Function]---GO:0046872///metal ion binding+++GO:0020037///heme binding+++GO:0016491///oxidoreductase activity+++GO:0004601///peroxidase activity+++[Biological Process]---GO:0002376///immune system process+++GO:0010629///negative regulation of gene expression+++GO:0008340///determination of adult lifespan+++GO:0098869///cellular …	cellular_component+++molecular_function+++biological_process	[Cellular Component]---extracellular region part+++extracellular region+++[Molecular Function]---binding+++catalytic activity+++antioxidant activity+++[Biological Process]---developmental process+++cellular process+++multicellular organismal process+++detoxification+++negative regulation of biological process+++biological regulation+++metabolic process+++immune system process+++regulation of biol…
174065	cutl-16	mRNA	[Cellular Component]---GO:0016021///integral component of membrane+++GO:0016020///membrane	cellular_component	[Cellular Component]---membrane part+++membrane
186796	H32C10.1	mRNA	[Cellular Component]---GO:0005739///mitochondrion+++[Biological Process]---GO:0046474///glycerophospholipid biosynthetic process	cellular_component+++biological_process	[Cellular Component]---organelle+++cell part+++cell+++[Biological Process]---cellular process+++metabolic process
176760	T03F6.3	mRNA	[Cellular Component]---GO:0005737///cytoplasm+++[Molecular Function]---GO:0004342///glucosamine-6-phosphate deaminase activity+++GO:0042802///identical protein binding+++GO:0016787///hydrolase activity+++[Biological Process]---GO:0006046///N-acetylglucosamine catabolic process+++GO:0006048///UDP-N-acetylglucosamine biosynthetic process+++GO:0005975///carbohydrate metabolic process+++GO:0006044///…	cellular_component+++molecular_function+++biological_process	[Cellular Component]---cell part+++cell+++[Molecular Function]---binding+++catalytic activity+++[Biological Process]---cellular process+++metabolic process
191737	old-1	mRNA	[Cellular Component]---GO:0016021///integral component of membrane+++GO:0005886///plasma membrane+++GO:0005887///integral component of plasma membrane+++GO:0043235///receptor complex+++GO:0005737///cytoplasm+++GO:0016020///membrane+++[Molecular Function]---GO:0004888///transmembrane signaling receptor activity+++GO:0004713///protein tyrosine kinase activity+++GO:0000166///nucleotide binding+++GO:…	cellular_component+++molecular_function+++biological_process	[Cellular Component]---protein-containing complex+++cell part+++membrane part+++membrane+++cell+++[Molecular Function]---binding+++catalytic activity+++molecular transducer activity+++[Biological Process]---developmental process+++positive regulation of biological process+++cellular process+++signaling+++negative regulation of biological process+++biological regulation+++metabolic process+++regul…
6418658	T12B5.14	mRNA	[Cellular Component]---GO:0016021///integral component of membrane+++GO:0016020///membrane	cellular_component	[Cellular Component]---membrane part+++membrane
191295	ZK354.8	mRNA	[Molecular Function]---GO:0016787///hydrolase activity+++GO:0004721///phosphoprotein phosphatase activity+++GO:0004725///protein tyrosine phosphatase activity+++GO:0016791///phosphatase activity+++[Biological Process]---GO:0016311///dephosphorylation+++GO:0035335///peptidyl-tyrosine dephosphorylation+++GO:0006470///protein dephosphorylation	molecular_function+++biological_process	[Molecular Function]---catalytic activity+++[Biological Process]---cellular process+++metabolic process
175891	F47D12.7	mRNA	[Cellular Component]---GO:0031463///Cul3-RING ubiquitin ligase complex+++[Biological Process]---GO:0016567///protein ubiquitination	cellular_component+++biological_process	[Cellular Component]---protein-containing complex+++cell part+++cell+++[Biological Process]---cellular process+++metabolic process
177291	C24D10.1	mRNA	[Cellular Component]---GO:0005634///nucleus+++[Molecular Function]---GO:0004725///protein tyrosine phosphatase activity+++GO:0016791///phosphatase activity+++[Biological Process]---GO:0016311///dephosphorylation+++GO:0035335///peptidyl-tyrosine dephosphorylation+++GO:0006470///protein dephosphorylation	cellular_component+++molecular_function+++biological_process	[Cellular Component]---organelle+++cell part+++cell+++[Molecular Function]---catalytic activity+++[Biological Process]---cellular process+++metabolic process
180630	vit-5	mRNA	[Cellular Component]---GO:0005576///extracellular region+++[Molecular Function]---GO:0045735///nutrient reservoir activity+++GO:0005319///lipid transporter activity+++[Biological Process]---GO:0006869///lipid transport	cellular_component+++molecular_function+++biological_process	[Cellular Component]---extracellular region+++[Molecular Function]---transporter activity+++nutrient reservoir activity+++[Biological Process]---localization
181432	nhr-25	mRNA	[Cellular Component]---GO:0090575///RNA polymerase II transcription factor complex+++GO:0005634///nucleus+++[Molecular Function]---GO:0046872///metal ion binding+++GO:0004879///nuclear receptor activity+++GO:0008270///zinc ion binding+++GO:0003700///DNA-binding transcription factor activity+++GO:0003677///DNA binding+++GO:0000976///transcription regulatory region sequence-specific DNA binding+++G…	cellular_component+++molecular_function+++biological_process	[Cellular Component]---protein-containing complex+++organelle+++cell part+++cell+++organelle part+++[Molecular Function]---transcription regulator activity+++binding+++molecular transducer activity+++[Biological Process]---positive regulation of biological process+++developmental process+++multicellular organismal process+++cellular process+++signaling+++biological regulation+++metabolic process+…
191527	ZK1128.3	mRNA	[Cellular Component]---GO:0000439///transcription factor TFIIH core complex+++[Biological Process]---GO:0006289///nucleotide-excision repair+++GO:0006355///regulation of transcription, DNA-templated	cellular_component+++biological_process	[Cellular Component]---protein-containing complex+++organelle+++cell+++cell part+++organelle part+++[Biological Process]---regulation of biological process+++cellular process+++response to stimulus+++biological regulation+++metabolic process
182122	C02F5.5	mRNA	[Cellular Component]---GO:0016021///integral component of membrane	cellular_component	[Cellular Component]---membrane part+++membrane
174756	twk-5	mRNA	[Cellular Component]---GO:0016021///integral component of membrane+++GO:0005887///integral component of plasma membrane+++GO:0016020///membrane+++[Molecular Function]---GO:0005267///potassium channel activity+++GO:0022841///potassium ion leak channel activity+++[Biological Process]---GO:0006811///ion transport+++GO:0071805///potassium ion transmembrane transport	cellular_component+++molecular_function+++biological_process	[Cellular Component]---cell part+++membrane part+++cell+++membrane+++[Molecular Function]---transporter activity+++[Biological Process]---cellular process+++localization
191335	pqn-97	mRNA	[Cellular Component]---GO:0016021///integral component of membrane+++GO:0016020///membrane	cellular_component	[Cellular Component]---membrane part+++membrane
178589	K09C6.7	mRNA	[Cellular Component]---GO:0005737///cytoplasm+++GO:0005634///nucleus+++[Molecular Function]---GO:0004674///protein serine/threonine kinase activity+++[Biological Process]---GO:0018107///peptidyl-threonine phosphorylation+++GO:0018105///peptidyl-serine phosphorylation	cellular_component+++molecular_function+++biological_process	[Cellular Component]---organelle+++cell part+++cell+++[Molecular Function]---catalytic activity+++[Biological Process]---cellular process+++metabolic process
182486	gad-2	mRNA	[Cellular Component]---GO:0016021///integral component of membrane+++GO:0016020///membrane+++[Biological Process]---GO:0007369///gastrulation	cellular_component+++biological_process	[Cellular Component]---membrane part+++membrane+++[Biological Process]---developmental process+++multicellular organismal process
185764	rgs-10	mRNA	[Cellular Component]---GO:0005737///cytoplasm+++GO:0005886///plasma membrane+++[Molecular Function]---GO:0005096///GTPase activator activity+++[Biological Process]---GO:0007275///multicellular organism development+++GO:0000003///reproduction+++GO:0009792///embryo development ending in birth or egg hatching+++GO:0009968///negative regulation of signal transduction	cellular_component+++molecular_function+++biological_process	[Cellular Component]---cell part+++membrane+++cell+++[Molecular Function]---molecular function regulator+++[Biological Process]---reproduction+++developmental process+++cellular process+++multicellular organismal process+++signaling+++negative regulation of biological process+++biological regulation+++regulation of biological process+++response to stimulus
177749	flh-1	mRNA	[Molecular Function]---GO:0003700///DNA-binding transcription factor activity+++GO:0043565///sequence-specific DNA binding+++[Biological Process]---GO:0045892///negative regulation of transcription, DNA-templated+++GO:0002119///nematode larval development	molecular_function+++biological_process	[Molecular Function]---binding+++transcription regulator activity+++[Biological Process]---developmental process+++cellular process+++multicellular organismal process+++negative regulation of biological process+++biological regulation+++metabolic process+++regulation of biological process
176274	zif-1	mRNA	[Molecular Function]---GO:0005515///protein binding+++[Biological Process]---GO:0007275///multicellular organism development+++GO:0006511///ubiquitin-dependent protein catabolic process+++GO:0009792///embryo development ending in birth or egg hatching+++GO:0016567///protein ubiquitination	molecular_function+++biological_process	[Molecular Function]---binding+++[Biological Process]---developmental process+++multicellular organismal process+++cellular process+++metabolic process
188399	cyp-34A1	mRNA	[Molecular Function]---GO:0016705///oxidoreductase activity, acting on paired donors, with incorporation or reduction of molecular oxygen+++GO:0008395///steroid hydroxylase activity+++GO:0020037///heme binding+++GO:0005506///iron ion binding	molecular_function	[Molecular Function]---binding+++catalytic activity
181438	R03G8.6	mRNA	[Cellular Component]---GO:0005737///cytoplasm+++[Molecular Function]---GO:0046872///metal ion binding+++GO:0008270///zinc ion binding+++GO:0070006///metalloaminopeptidase activity+++GO:0008237///metallopeptidase activity+++GO:0008233///peptidase activity+++GO:0016787///hydrolase activity+++GO:0004177///aminopeptidase activity+++GO:0042277///peptide binding+++[Biological Process]---GO:0043171///pe…	cellular_component+++molecular_function+++biological_process	[Cellular Component]---cell part+++cell+++[Molecular Function]---binding+++catalytic activity+++[Biological Process]---cellular process+++metabolic process
173804	T05A7.6	mRNA	[Cellular Component]---GO:0005737///cytoplasm+++GO:0005634///nucleus+++[Molecular Function]---GO:0004672///protein kinase activity+++GO:0005524///ATP binding+++[Biological Process]---GO:0018107///peptidyl-threonine phosphorylation+++GO:0018105///peptidyl-serine phosphorylation+++GO:0006468///protein phosphorylation	cellular_component+++molecular_function+++biological_process	[Cellular Component]---organelle+++cell part+++cell+++[Molecular Function]---binding+++catalytic activity+++[Biological Process]---cellular process+++metabolic process
181219	col-176	mRNA	[Cellular Component]---GO:0005581///collagen trimer+++[Molecular Function]---GO:0042302///structural constituent of cuticle	cellular_component+++molecular_function	[Cellular Component]---protein-containing complex+++[Molecular Function]---structural molecule activity
177828	msp-10	mRNA	[Cellular Component]---GO:0005856///cytoskeleton+++GO:0042995///cell projection+++GO:0031143///pseudopodium+++GO:0005737///cytoplasm	cellular_component	[Cellular Component]---organelle+++cell part+++cell
172056	Y119C1B.1	mRNA	[Cellular Component]---GO:0016021///integral component of membrane+++GO:0016020///membrane	cellular_component	[Cellular Component]---membrane part+++membrane
180106	nhr-54	mRNA	[Cellular Component]---GO:0005634///nucleus+++[Molecular Function]---GO:0046872///metal ion binding+++GO:0008270///zinc ion binding+++GO:0003700///DNA-binding transcription factor activity+++GO:0003677///DNA binding+++GO:0043565///sequence-specific DNA binding+++[Biological Process]---GO:0006355///regulation of transcription, DNA-templated	cellular_component+++molecular_function+++biological_process	[Cellular Component]---organelle+++cell part+++cell+++[Molecular Function]---transcription regulator activity+++binding+++[Biological Process]---cellular process+++biological regulation+++metabolic process+++regulation of biological process
183635	nhr-129	mRNA	[Cellular Component]---GO:0005634///nucleus+++[Molecular Function]---GO:0046872///metal ion binding+++GO:0008270///zinc ion binding+++GO:0003700///DNA-binding transcription factor activity+++GO:0003677///DNA binding+++GO:0003707///steroid hormone receptor activity+++GO:0043565///sequence-specific DNA binding+++[Biological Process]---GO:0006355///regulation of transcription, DNA-templated+++GO:004…	cellular_component+++molecular_function+++biological_process	[Cellular Component]---organelle+++cell part+++cell+++[Molecular Function]---transcription regulator activity+++binding+++molecular transducer activity+++[Biological Process]---cellular process+++signaling+++biological regulation+++metabolic process+++regulation of biological process+++response to stimulus
175033	his-44	mRNA	[Cellular Component]---GO:0000785///chromatin+++GO:0005634///nucleus+++GO:0000786///nucleosome+++[Molecular Function]---GO:0003677///DNA binding+++GO:0046982///protein heterodimerization activity+++[Biological Process]---GO:0006334///nucleosome assembly	cellular_component+++molecular_function+++biological_process	[Cellular Component]---protein-containing complex+++organelle+++cell part+++cell+++organelle part+++[Molecular Function]---binding+++[Biological Process]---cellular process+++cellular component organization or biogenesis
171950	ptr-2	mRNA	[Cellular Component]---GO:0016021///integral component of membrane+++GO:0016020///membrane+++[Molecular Function]---GO:0022857///transmembrane transporter activity+++[Biological Process]---GO:0055085///transmembrane transport+++GO:0000281///mitotic cytokinesis+++GO:0045138///nematode male tail tip morphogenesis+++GO:0018996///molting cycle, collagen and cuticulin-based cuticle	cellular_component+++molecular_function+++biological_process	[Cellular Component]---membrane part+++membrane+++[Molecular Function]---transporter activity+++[Biological Process]---reproduction+++developmental process+++multicellular organismal process+++cellular process+++reproductive process+++localization
182487	C10A4.6	mRNA	[Cellular Component]---GO:0016021///integral component of membrane+++GO:0016020///membrane	cellular_component	[Cellular Component]---membrane part+++membrane
4363028	poml-4	mRNA	[Molecular Function]---GO:0004064///arylesterase activity	molecular_function	[Molecular Function]---catalytic activity
189029	hic-1	mRNA	[Cellular Component]---GO:0016021///integral component of membrane+++GO:0016020///membrane	cellular_component	[Cellular Component]---membrane part+++membrane
177406	puf-11	mRNA	[Cellular Component]---GO:0000932///P-body+++GO:0005737///cytoplasm+++GO:0043186///P granule+++[Molecular Function]---GO:0003723///RNA binding+++[Biological Process]---GO:0006417///regulation of translation+++GO:0040019///positive regulation of embryonic development+++GO:0007275///multicellular organism development+++GO:0007049///cell cycle+++GO:0051301///cell division+++GO:0048477///oogenesis	cellular_component+++molecular_function+++biological_process	[Cellular Component]---protein-containing complex+++organelle+++cell part+++cell+++[Molecular Function]---binding+++[Biological Process]---reproduction+++multi-organism process+++positive regulation of biological process+++developmental process+++multicellular organismal process+++cellular process+++biological regulation+++metabolic process+++reproductive process+++regulation of biological process
185179	F31F7.1	mRNA	[Biological Process]---GO:0045087///innate immune response	biological_process	[Biological Process]---immune system process+++response to stimulus
6418708	C45B11.6	mRNA	[Cellular Component]---GO:0016021///integral component of membrane+++GO:0005783///endoplasmic reticulum+++GO:0016020///membrane+++GO:0005789///endoplasmic reticulum membrane+++[Molecular Function]---GO:0033961///cis-stilbene-oxide hydrolase activity+++GO:0016787///hydrolase activity+++GO:0003824///catalytic activity+++[Biological Process]---GO:0019439///aromatic compound catabolic process	cellular_component+++molecular_function+++biological_process	[Cellular Component]---organelle+++cell part+++membrane part+++membrane+++cell+++organelle part+++[Molecular Function]---catalytic activity+++[Biological Process]---cellular process+++metabolic process
185991	arrd-24	mRNA	[Molecular Function]---GO:0005515///protein binding	molecular_function	[Molecular Function]---binding
177661	mpst-6	mRNA	[Molecular Function]---GO:0016740///transferase activity	molecular_function	[Molecular Function]---catalytic activity
180507	rgs-8.1	mRNA	[Cellular Component]---GO:0005737///cytoplasm+++GO:0005886///plasma membrane+++[Molecular Function]---GO:0005096///GTPase activator activity+++[Biological Process]---GO:0009968///negative regulation of signal transduction	cellular_component+++molecular_function+++biological_process	[Cellular Component]---cell part+++membrane+++cell+++[Molecular Function]---molecular function regulator+++[Biological Process]---cellular process+++signaling+++negative regulation of biological process+++biological regulation+++regulation of biological process+++response to stimulus
178889	cpt-4	mRNA	[Cellular Component]---GO:0005739///mitochondrion+++[Molecular Function]---GO:0016746///transferase activity, transferring acyl groups+++GO:0004095///carnitine O-palmitoyltransferase activity+++GO:0016740///transferase activity+++[Biological Process]---GO:0009437///carnitine metabolic process	cellular_component+++molecular_function+++biological_process	[Cellular Component]---organelle+++cell part+++cell+++[Molecular Function]---catalytic activity+++[Biological Process]---cellular process+++metabolic process
177307	F36H12.3	mRNA	[Cellular Component]---GO:0005856///cytoskeleton	cellular_component	[Cellular Component]---organelle+++cell part+++cell
172575	H05L14.1	mRNA	[Cellular Component]---GO:0005737///cytoplasm+++GO:0005634///nucleus+++[Molecular Function]---GO:0004672///protein kinase activity+++GO:0005524///ATP binding+++[Biological Process]---GO:0018107///peptidyl-threonine phosphorylation+++GO:0018105///peptidyl-serine phosphorylation+++GO:0006468///protein phosphorylation	cellular_component+++molecular_function+++biological_process	[Cellular Component]---organelle+++cell part+++cell+++[Molecular Function]---binding+++catalytic activity+++[Biological Process]---cellular process+++metabolic process
172848	Y106G6A.4	mRNA	[Cellular Component]---GO:0005737///cytoplasm	cellular_component	[Cellular Component]---cell+++cell part
176869	daf-18	mRNA	[Cellular Component]---GO:0043204///perikaryon+++GO:0030424///axon+++GO:0043025///neuronal cell body+++GO:0030425///dendrite+++GO:0005886///plasma membrane+++GO:0042995///cell projection+++GO:0009898///cytoplasmic side of plasma membrane+++GO:0005634///nucleus+++GO:0005737///cytoplasm+++GO:0016020///membrane+++[Molecular Function]---GO:0008289///lipid binding+++GO:0016314///phosphatidylinositol-3…	cellular_component+++molecular_function+++biological_process	[Cellular Component]---organelle+++cell part+++membrane part+++membrane+++cell+++[Molecular Function]---binding+++catalytic activity+++[Biological Process]---positive regulation of biological process+++developmental process+++multicellular organismal process+++cellular process+++biological regulation+++metabolic process+++regulation of biological process+++behavior+++response to stimulus+++locali…
183790	C54E4.5	mRNA	[Cellular Component]---GO:0005737///cytoplasm+++[Molecular Function]---GO:0005506///iron ion binding+++GO:0050113///inositol oxygenase activity+++[Biological Process]---GO:0019310///inositol catabolic process+++GO:0055114///oxidation-reduction process	cellular_component+++molecular_function+++biological_process	[Cellular Component]---cell part+++cell+++[Molecular Function]---binding+++catalytic activity+++[Biological Process]---cellular process+++metabolic process
185201	neg-1	mRNA	[Cellular Component]---GO:0005634///nucleus	cellular_component	[Cellular Component]---organelle+++cell part+++cell
187395	M02B1.4	mRNA	[Cellular Component]---GO:0016021///integral component of membrane+++GO:0016020///membrane	cellular_component	[Cellular Component]---membrane part+++membrane
184253	ttr-21	mRNA	[Cellular Component]---GO:0005615///extracellular space+++[Biological Process]---GO:0050829///defense response to Gram-negative bacterium	cellular_component+++biological_process	[Cellular Component]---extracellular region part+++extracellular region+++[Biological Process]---multi-organism process+++response to stimulus
180532	peb-1	mRNA	[Cellular Component]---GO:0005634///nucleus+++[Molecular Function]---GO:0000980///RNA polymerase II distal enhancer sequence-specific DNA binding+++[Biological Process]---GO:0009887///animal organ morphogenesis+++GO:0007442///hindgut morphogenesis+++GO:0040025///vulval development+++GO:0040010///positive regulation of growth rate	cellular_component+++molecular_function+++biological_process	[Cellular Component]---organelle+++cell part+++cell+++[Molecular Function]---binding+++[Biological Process]---positive regulation of biological process+++developmental process+++multicellular organismal process+++growth+++biological regulation+++regulation of biological process
3564833	C27D6.11	mRNA	[Cellular Component]---GO:0005634///nucleus+++GO:0005737///cytoplasm+++[Molecular Function]---GO:0004674///protein serine/threonine kinase activity+++GO:0000166///nucleotide binding+++GO:0004672///protein kinase activity+++GO:0005524///ATP binding+++[Biological Process]---GO:0035556///intracellular signal transduction+++GO:0006468///protein phosphorylation	cellular_component+++molecular_function+++biological_process	[Cellular Component]---organelle+++cell part+++cell+++[Molecular Function]---binding+++catalytic activity+++[Biological Process]---cellular process+++signaling+++biological regulation+++metabolic process+++regulation of biological process+++response to stimulus
184979	che-7	mRNA	[Cellular Component]---GO:0016021///integral component of membrane+++GO:0005886///plasma membrane+++GO:0005921///gap junction+++GO:0030054///cell junction+++GO:0016020///membrane+++[Molecular Function]---GO:0005243///gap junction channel activity+++[Biological Process]---GO:0055085///transmembrane transport+++GO:0006811///ion transport	cellular_component+++molecular_function+++biological_process	[Cellular Component]---cell part+++membrane part+++cell junction+++cell+++membrane+++[Molecular Function]---transporter activity+++[Biological Process]---localization
187099	srx-68	mRNA	[Cellular Component]---GO:0016021///integral component of membrane+++GO:0016020///membrane	cellular_component	[Cellular Component]---membrane part+++membrane
3565220	K02F6.3	mRNA	[Cellular Component]---GO:0016021///integral component of membrane+++GO:0016020///membrane	cellular_component	[Cellular Component]---membrane part+++membrane
13212503	T05B4.14	mRNA	[Cellular Component]---GO:0016021///integral component of membrane+++GO:0016020///membrane+++[Biological Process]---GO:0045087///innate immune response	cellular_component+++biological_process	[Cellular Component]---membrane part+++membrane+++[Biological Process]---immune system process+++response to stimulus
181006	F48E3.4	mRNA	[Molecular Function]---GO:0004252///serine-type endopeptidase activity+++[Biological Process]---GO:0006508///proteolysis	molecular_function+++biological_process	[Molecular Function]---catalytic activity+++[Biological Process]---metabolic process
172647	rskn-1	mRNA	[Cellular Component]---GO:0005634///nucleus+++GO:0005737///cytoplasm+++[Molecular Function]---GO:0004674///protein serine/threonine kinase activity+++GO:0000287///magnesium ion binding+++GO:0004711///ribosomal protein S6 kinase activity+++GO:0000166///nucleotide binding+++GO:0004672///protein kinase activity+++GO:0016740///transferase activity+++GO:0005524///ATP binding+++GO:0016301///kinase acti…	cellular_component+++molecular_function+++biological_process	[Cellular Component]---organelle+++cell part+++cell+++[Molecular Function]---binding+++catalytic activity+++[Biological Process]---developmental process+++multicellular organismal process+++cellular process+++signaling+++biological regulation+++metabolic process+++regulation of biological process+++response to stimulus
189435	flh-3	mRNA	[Molecular Function]---GO:0003700///DNA-binding transcription factor activity+++GO:0043565///sequence-specific DNA binding+++[Biological Process]---GO:0045892///negative regulation of transcription, DNA-templated	molecular_function+++biological_process	[Molecular Function]---binding+++transcription regulator activity+++[Biological Process]---cellular process+++negative regulation of biological process+++biological regulation+++metabolic process+++regulation of biological process
185853	ceh-27	mRNA	[Cellular Component]---GO:0005634///nucleus+++[Molecular Function]---GO:0000977///RNA polymerase II regulatory region sequence-specific DNA binding+++GO:0000981///DNA-binding transcription factor activity, RNA polymerase II-specific+++GO:0003677///DNA binding+++GO:0043565///sequence-specific DNA binding+++[Biological Process]---GO:0006355///regulation of transcription, DNA-templated+++GO:0006357/…	cellular_component+++molecular_function+++biological_process	[Cellular Component]---organelle+++cell part+++cell+++[Molecular Function]---transcription regulator activity+++binding+++[Biological Process]---cellular process+++biological regulation+++metabolic process+++regulation of biological process
192089	zig-6	mRNA	[Cellular Component]---GO:0030424///axon+++GO:0005576///extracellular region+++GO:0005886///plasma membrane+++GO:0016020///membrane+++[Molecular Function]---GO:0098632///cell-cell adhesion mediator activity+++[Biological Process]---GO:0070593///dendrite self-avoidance+++GO:0007156///homophilic cell adhesion via plasma membrane adhesion molecules+++GO:0007411///axon guidance+++GO:0042592///homeost…	cellular_component+++molecular_function+++biological_process	[Cellular Component]---cell part+++extracellular region+++cell+++membrane+++[Molecular Function]---binding+++[Biological Process]---developmental process+++cellular process+++multicellular organismal process+++biological regulation+++cellular component organization or biogenesis+++response to stimulus+++biological adhesion+++locomotion
174531	wee-1.3	mRNA	[Cellular Component]---GO:0000793///condensed chromosome+++GO:0019898///extrinsic component of membrane+++GO:0097038///perinuclear endoplasmic reticulum+++GO:0000139///Golgi membrane+++GO:0005886///plasma membrane+++GO:0005794///Golgi apparatus+++GO:0005635///nuclear envelope+++GO:0005634///nucleus+++GO:0005737///cytoplasm+++GO:0016020///membrane+++[Molecular Function]---GO:0004861///cyclin-depen…	cellular_component+++molecular_function+++biological_process	[Cellular Component]---organelle+++cell part+++membrane part+++cell+++membrane+++organelle part+++[Molecular Function]---binding+++catalytic activity+++molecular function regulator+++[Biological Process]---reproduction+++multi-organism process+++developmental process+++cellular process+++multicellular organismal process+++negative regulation of biological process+++biological regulation+++metabol…
178335	Y45F10C.4	mRNA	[Cellular Component]---GO:0005576///extracellular region	cellular_component	[Cellular Component]---extracellular region
188277	T08B6.4	mRNA	[Cellular Component]---GO:0016021///integral component of membrane+++GO:0016020///membrane	cellular_component	[Cellular Component]---membrane part+++membrane
180763	T07F12.4	mRNA	[Molecular Function]---GO:0004674///protein serine/threonine kinase activity+++GO:0000166///nucleotide binding+++GO:0004672///protein kinase activity+++GO:0005524///ATP binding+++[Biological Process]---GO:0006468///protein phosphorylation	molecular_function+++biological_process	[Molecular Function]---binding+++catalytic activity+++[Biological Process]---cellular process+++metabolic process
187510	egg-2	mRNA	[Cellular Component]---GO:0016021///integral component of membrane+++GO:0010008///endosome membrane+++GO:0005886///plasma membrane+++GO:0005768///endosome+++GO:0016020///membrane+++[Molecular Function]---GO:0038023///signaling receptor activity+++[Biological Process]---GO:0030703///eggshell formation+++GO:0007275///multicellular organism development+++GO:1903078///positive regulation of protein l…	cellular_component+++molecular_function+++biological_process	[Cellular Component]---organelle+++cell part+++membrane part+++membrane+++cell+++organelle part+++[Molecular Function]---molecular transducer activity+++[Biological Process]---reproduction+++multi-organism process+++positive regulation of biological process+++developmental process+++cellular process+++multicellular organismal process+++biological regulation+++reproductive process+++regulation of …
184473	cyp-13A12	mRNA	[Cellular Component]---GO:0016021///integral component of membrane+++[Molecular Function]---GO:0016705///oxidoreductase activity, acting on paired donors, with incorporation or reduction of molecular oxygen+++GO:0004497///monooxygenase activity+++GO:0020037///heme binding+++GO:0005506///iron ion binding	cellular_component+++molecular_function	[Cellular Component]---membrane part+++membrane+++[Molecular Function]---binding+++catalytic activity
181288	pxn-2	mRNA	[Cellular Component]---GO:0005604///basement membrane+++GO:0005615///extracellular space+++[Molecular Function]---GO:0020037///heme binding+++GO:0004601///peroxidase activity+++[Biological Process]---GO:0071711///basement membrane organization+++GO:0016203///muscle attachment+++GO:0098869///cellular oxidant detoxification+++GO:0006979///response to oxidative stress+++GO:0048681///negative regulat…	cellular_component+++molecular_function+++biological_process	[Cellular Component]---extracellular region part+++extracellular region+++[Molecular Function]---binding+++catalytic activity+++antioxidant activity+++[Biological Process]---developmental process+++cellular process+++multicellular organismal process+++detoxification+++negative regulation of biological process+++metabolic process+++biological regulation+++regulation of biological process+++cellula…
173639	Y110A2AR.1	mRNA	[Cellular Component]---GO:0016021///integral component of membrane+++GO:0016020///membrane	cellular_component	[Cellular Component]---membrane part+++membrane
180506	rgs-9	mRNA	[Cellular Component]---GO:0005737///cytoplasm+++GO:0005886///plasma membrane+++[Molecular Function]---GO:0005096///GTPase activator activity+++[Biological Process]---GO:0009968///negative regulation of signal transduction	cellular_component+++molecular_function+++biological_process	[Cellular Component]---cell part+++membrane+++cell+++[Molecular Function]---molecular function regulator+++[Biological Process]---cellular process+++signaling+++negative regulation of biological process+++biological regulation+++regulation of biological process+++response to stimulus
184721	cutl-3	mRNA	[Cellular Component]---GO:0016021///integral component of membrane+++GO:0016020///membrane	cellular_component	[Cellular Component]---membrane part+++membrane
180852	atat-2	mRNA	[Cellular Component]---GO:0005575///cellular_component+++GO:0005874///microtubule+++[Molecular Function]---GO:0016746///transferase activity, transferring acyl groups+++GO:0019799///tubulin N-acetyltransferase activity+++GO:0016740///transferase activity+++GO:0004468///lysine N-acetyltransferase activity, acting on acetyl phosphate as donor+++[Biological Process]---GO:0071929///alpha-tubulin acet…	cellular_component+++molecular_function+++biological_process	[Cellular Component]---supramolecular complex+++organelle+++cell part+++cell+++cellular_component+++organelle part+++[Molecular Function]---catalytic activity+++[Biological Process]---developmental process+++multicellular organismal process+++cellular process+++biological regulation+++metabolic process+++regulation of biological process+++cellular component organization or biogenesis+++response t…
181273	vap-2	mRNA	[Cellular Component]---GO:0016021///integral component of membrane+++GO:0005576///extracellular region+++GO:0016020///membrane+++[Molecular Function]---GO:0003674///molecular_function+++[Biological Process]---GO:0008150///biological_process	cellular_component+++molecular_function+++biological_process	[Cellular Component]---membrane part+++extracellular region+++membrane+++[Molecular Function]---molecular_function+++[Biological Process]---biological_process
187184	cyp-14A2	mRNA	[Molecular Function]---GO:0016705///oxidoreductase activity, acting on paired donors, with incorporation or reduction of molecular oxygen+++GO:0004497///monooxygenase activity+++GO:0020037///heme binding+++GO:0005506///iron ion binding	molecular_function	[Molecular Function]---binding+++catalytic activity
178770	slc-28.1	mRNA	[Cellular Component]---GO:0016021///integral component of membrane+++GO:0005887///integral component of plasma membrane+++GO:0016020///membrane+++[Molecular Function]---GO:0005415///nucleoside:sodium symporter activity+++GO:0005337///nucleoside transmembrane transporter activity+++[Biological Process]---GO:1901642///nucleoside transmembrane transport	cellular_component+++molecular_function+++biological_process	[Cellular Component]---cell part+++membrane part+++cell+++membrane+++[Molecular Function]---transporter activity+++[Biological Process]---localization
13179121	Y48G1C.13	mRNA	[Cellular Component]---GO:0005576///extracellular region+++[Molecular Function]---GO:0008061///chitin binding+++[Biological Process]---GO:0006030///chitin metabolic process	cellular_component+++molecular_function+++biological_process	[Cellular Component]---extracellular region+++[Molecular Function]---binding+++[Biological Process]---cellular process+++metabolic process
185229	F33D11.7	mRNA	[Cellular Component]---GO:0005737///cytoplasm+++GO:0005634///nucleus+++[Molecular Function]---GO:0004672///protein kinase activity+++GO:0005524///ATP binding+++[Biological Process]---GO:0018107///peptidyl-threonine phosphorylation+++GO:0018105///peptidyl-serine phosphorylation+++GO:0006468///protein phosphorylation	cellular_component+++molecular_function+++biological_process	[Cellular Component]---organelle+++cell part+++cell+++[Molecular Function]---binding+++catalytic activity+++[Biological Process]---cellular process+++metabolic process
174836	mex-1	mRNA	[Cellular Component]---GO:0043186///P granule+++GO:0005737///cytoplasm+++GO:0005829///cytosol+++[Molecular Function]---GO:0046872///metal ion binding+++GO:0003723///RNA binding+++GO:0003730///mRNA 3'-UTR binding+++[Biological Process]---GO:0001704///formation of primary germ layer+++GO:0009792///embryo development ending in birth or egg hatching+++GO:0061158///3'-UTR-mediated mRNA destabilization…	cellular_component+++molecular_function+++biological_process	[Cellular Component]---protein-containing complex+++organelle+++cell part+++cell+++[Molecular Function]---binding+++[Biological Process]---positive regulation of biological process+++developmental process+++cellular process+++multicellular organismal process+++negative regulation of biological process+++biological regulation+++metabolic process+++regulation of biological process
171759	Y71G12A.4	mRNA	[Cellular Component]---GO:0016021///integral component of membrane+++GO:0016020///membrane	cellular_component	[Cellular Component]---membrane part+++membrane
183182	nhr-163	mRNA	[Cellular Component]---GO:0005634///nucleus+++[Molecular Function]---GO:0046872///metal ion binding+++GO:0008270///zinc ion binding+++GO:0003700///DNA-binding transcription factor activity+++GO:0003677///DNA binding+++GO:0043565///sequence-specific DNA binding+++[Biological Process]---GO:0006355///regulation of transcription, DNA-templated	cellular_component+++molecular_function+++biological_process	[Cellular Component]---organelle+++cell part+++cell+++[Molecular Function]---transcription regulator activity+++binding+++[Biological Process]---cellular process+++biological regulation+++metabolic process+++regulation of biological process
183954	D2062.4	mRNA	[Cellular Component]---GO:0016021///integral component of membrane+++GO:0016020///membrane	cellular_component	[Cellular Component]---membrane part+++membrane
184503	F14H12.7	mRNA	[Cellular Component]---GO:0016021///integral component of membrane+++GO:0016020///membrane	cellular_component	[Cellular Component]---membrane part+++membrane
178809	phat-3	mRNA	[Biological Process]---GO:1905905///pharyngeal gland morphogenesis	biological_process	[Biological Process]---developmental process+++multicellular organismal process
177036	Y69A2AR.19	mRNA	[Cellular Component]---GO:0016021///integral component of membrane+++GO:0016020///membrane+++[Molecular Function]---GO:0016787///hydrolase activity+++GO:0004725///protein tyrosine phosphatase activity+++GO:0016791///phosphatase activity+++[Biological Process]---GO:0016311///dephosphorylation+++GO:0035335///peptidyl-tyrosine dephosphorylation+++GO:0006470///protein dephosphorylation	cellular_component+++molecular_function+++biological_process	[Cellular Component]---membrane part+++membrane+++[Molecular Function]---catalytic activity+++[Biological Process]---cellular process+++metabolic process
188904	bbs-8	mRNA	[Cellular Component]---GO:0097730///non-motile cilium+++GO:0034464///BBSome+++GO:0005929///cilium+++GO:0005856///cytoskeleton+++GO:0044292///dendrite terminus+++GO:0042995///cell projection+++GO:0097546///ciliary base+++GO:0036064///ciliary basal body+++GO:0005737///cytoplasm+++GO:0043005///neuron projection+++[Molecular Function]---GO:0003674///molecular_function+++[Biological Process]---GO:0015…	cellular_component+++molecular_function+++biological_process	[Cellular Component]---protein-containing complex+++organelle+++cell part+++cell+++organelle part+++[Molecular Function]---molecular_function+++[Biological Process]---positive regulation of biological process+++cellular process+++multicellular organismal process+++biological regulation+++regulation of biological process+++cellular component organization or biogenesis+++behavior+++response to stim…
186227	F54D1.1	mRNA	[Molecular Function]---GO:0003723///RNA binding	molecular_function	[Molecular Function]---binding
173840	col-20	mRNA	[Cellular Component]---GO:0005615///extracellular space+++GO:0016021///integral component of membrane+++GO:0005581///collagen trimer+++GO:0031012///extracellular matrix+++GO:0016020///membrane+++[Molecular Function]---GO:0005201///extracellular matrix structural constituent+++GO:0042302///structural constituent of cuticle+++[Biological Process]---GO:0030198///extracellular matrix organization	cellular_component+++molecular_function+++biological_process	[Cellular Component]---extracellular region part+++protein-containing complex+++membrane part+++extracellular region+++membrane+++[Molecular Function]---structural molecule activity+++[Biological Process]---cellular process+++cellular component organization or biogenesis
177722	Y73F4A.2	mRNA	[Cellular Component]---GO:0005576///extracellular region	cellular_component	[Cellular Component]---extracellular region
178331	ule-4	mRNA	[Cellular Component]---GO:0005576///extracellular region	cellular_component	[Cellular Component]---extracellular region
180034	ZK1037.6	mRNA	[Cellular Component]---GO:0016021///integral component of membrane+++GO:0016020///membrane	cellular_component	[Cellular Component]---membrane part+++membrane
188419	T11F9.1	mRNA	[Cellular Component]---GO:0016021///integral component of membrane+++GO:0016020///membrane+++[Molecular Function]---GO:0004930///G protein-coupled receptor activity+++[Biological Process]---GO:0007186///G protein-coupled receptor signaling pathway	cellular_component+++molecular_function+++biological_process	[Cellular Component]---membrane part+++membrane+++[Molecular Function]---molecular transducer activity+++[Biological Process]---cellular process+++signaling+++biological regulation+++regulation of biological process+++response to stimulus
178766	C17B7.5	mRNA	[Cellular Component]---GO:0016021///integral component of membrane+++GO:0005634///nucleus+++GO:0005737///cytoplasm+++GO:0005829///cytosol+++GO:0016020///membrane+++[Molecular Function]---GO:0000224///peptide-N4-(N-acetyl-beta-glucosaminyl)asparagine amidase activity+++[Biological Process]---GO:0006516///glycoprotein catabolic process+++GO:0006515///protein quality control for misfolded or incompl…	cellular_component+++molecular_function+++biological_process	[Cellular Component]---organelle+++cell part+++membrane part+++membrane+++cell+++[Molecular Function]---catalytic activity+++[Biological Process]---cellular process+++metabolic process
179865	dct-17	mRNA	[Cellular Component]---GO:0045121///membrane raft+++[Biological Process]---GO:0045087///innate immune response	cellular_component+++biological_process	[Cellular Component]---membrane part+++membrane+++[Biological Process]---immune system process+++response to stimulus
181307	col-178	mRNA	[Cellular Component]---GO:0005615///extracellular space+++GO:0016021///integral component of membrane+++GO:0005581///collagen trimer+++GO:0031012///extracellular matrix+++GO:0016020///membrane+++[Molecular Function]---GO:0005201///extracellular matrix structural constituent+++GO:0042302///structural constituent of cuticle+++[Biological Process]---GO:0030198///extracellular matrix organization	cellular_component+++molecular_function+++biological_process	[Cellular Component]---extracellular region part+++protein-containing complex+++membrane part+++extracellular region+++membrane+++[Molecular Function]---structural molecule activity+++[Biological Process]---cellular process+++cellular component organization or biogenesis
178804	nlp-31	mRNA	[Cellular Component]---GO:0005576///extracellular region+++[Molecular Function]---GO:0003690///double-stranded DNA binding+++[Biological Process]---GO:0050832///defense response to fungus+++GO:0007218///neuropeptide signaling pathway+++GO:0098542///defense response to other organism+++GO:0031640///killing of cells of other organism+++GO:0042742///defense response to bacterium	cellular_component+++molecular_function+++biological_process	[Cellular Component]---extracellular region+++[Molecular Function]---binding+++[Biological Process]---multi-organism process+++cellular process+++signaling+++biological regulation+++regulation of biological process+++cell killing+++response to stimulus
188814	oac-48	mRNA	[Cellular Component]---GO:0016021///integral component of membrane+++GO:0016020///membrane+++[Molecular Function]---GO:0016746///transferase activity, transferring acyl groups+++GO:0016747///transferase activity, transferring acyl groups other than amino-acyl groups+++GO:0016740///transferase activity+++[Biological Process]---GO:0033692///cellular polysaccharide biosynthetic process	cellular_component+++molecular_function+++biological_process	[Cellular Component]---membrane part+++membrane+++[Molecular Function]---catalytic activity+++[Biological Process]---cellular process+++metabolic process
13221694	K07E3.9	mRNA	[Cellular Component]---GO:0016021///integral component of membrane+++GO:0016020///membrane	cellular_component	[Cellular Component]---membrane part+++membrane
181079	endu-2	mRNA	[Molecular Function]---GO:0004519///endonuclease activity+++GO:0004521///endoribonuclease activity+++[Biological Process]---GO:0090502///RNA phosphodiester bond hydrolysis, endonucleolytic+++GO:0045087///innate immune response+++GO:0090305///nucleic acid phosphodiester bond hydrolysis	molecular_function+++biological_process	[Molecular Function]---catalytic activity+++[Biological Process]---cellular process+++metabolic process+++immune system process+++response to stimulus
172606	spe-12	mRNA	[Cellular Component]---GO:0016021///integral component of membrane+++GO:0005886///plasma membrane+++GO:0016020///membrane+++[Biological Process]---GO:0007286///spermatid development	cellular_component+++biological_process	[Cellular Component]---cell part+++membrane part+++cell+++membrane+++[Biological Process]---reproduction+++multi-organism process+++developmental process+++cellular process+++multicellular organismal process+++reproductive process
176735	Y39E4B.5	mRNA	[Cellular Component]---GO:0016021///integral component of membrane+++GO:0016020///membrane+++[Molecular Function]---GO:0022857///transmembrane transporter activity+++[Biological Process]---GO:0055085///transmembrane transport	cellular_component+++molecular_function+++biological_process	[Cellular Component]---membrane part+++membrane+++[Molecular Function]---transporter activity+++[Biological Process]---localization
178759	apx-1	mRNA	[Cellular Component]---GO:0016021///integral component of membrane+++GO:0016020///membrane+++[Molecular Function]---GO:0003674///molecular_function+++[Biological Process]---GO:0030154///cell differentiation+++GO:0046331///lateral inhibition+++GO:0016331///morphogenesis of embryonic epithelium+++GO:0007154///cell communication+++GO:0007275///multicellular organism development+++GO:0008595///anteri…	cellular_component+++molecular_function+++biological_process	[Cellular Component]---membrane part+++membrane+++[Molecular Function]---molecular_function+++[Biological Process]---developmental process+++multicellular organismal process+++cellular process+++signaling+++biological regulation+++regulation of biological process
191643	gcy-5	mRNA	[Cellular Component]---GO:0005929///cilium+++GO:0016021///integral component of membrane+++GO:0005886///plasma membrane+++GO:0016020///membrane+++[Molecular Function]---GO:0016849///phosphorus-oxygen lyase activity+++GO:0004383///guanylate cyclase activity+++GO:0000166///nucleotide binding+++GO:0016829///lyase activity+++GO:0004672///protein kinase activity+++GO:0005525///GTP binding+++GO:0005524…	cellular_component+++molecular_function+++biological_process	[Cellular Component]---organelle+++cell part+++membrane part+++cell+++membrane+++[Molecular Function]---binding+++catalytic activity+++molecular transducer activity+++[Biological Process]---cellular process+++signaling+++biological regulation+++metabolic process+++regulation of biological process+++behavior+++response to stimulus+++locomotion
173751	R03H10.2	mRNA	[Cellular Component]---GO:0016021///integral component of membrane+++GO:0016020///membrane	cellular_component	[Cellular Component]---membrane part+++membrane
185739	F44E7.7	mRNA	[Cellular Component]---GO:0016021///integral component of membrane+++GO:0016020///membrane+++[Biological Process]---GO:0055085///transmembrane transport	cellular_component+++biological_process	[Cellular Component]---membrane part+++membrane+++[Biological Process]---localization
3565635	ubxn-5	mRNA	[Molecular Function]---GO:0005515///protein binding	molecular_function	[Molecular Function]---binding
183898	D1014.7	mRNA	[Cellular Component]---GO:0016021///integral component of membrane+++GO:0016020///membrane	cellular_component	[Cellular Component]---membrane part+++membrane
189009	T28A11.2	mRNA	[Cellular Component]---GO:0016021///integral component of membrane	cellular_component	[Cellular Component]---membrane part+++membrane
180832	T22B7.7	mRNA	[Cellular Component]---GO:0005739///mitochondrion+++[Molecular Function]---GO:0047617///acyl-CoA hydrolase activity+++[Biological Process]---GO:0006637///acyl-CoA metabolic process	cellular_component+++molecular_function+++biological_process	[Cellular Component]---organelle+++cell part+++cell+++[Molecular Function]---catalytic activity+++[Biological Process]---cellular process+++metabolic process
191293	ZK354.6	mRNA	[Cellular Component]---GO:0005737///cytoplasm+++GO:0005634///nucleus+++[Molecular Function]---GO:0004674///protein serine/threonine kinase activity+++GO:0000166///nucleotide binding+++GO:0004672///protein kinase activity+++GO:0005524///ATP binding+++[Biological Process]---GO:0018107///peptidyl-threonine phosphorylation+++GO:0018105///peptidyl-serine phosphorylation+++GO:0006468///protein phosphor…	cellular_component+++molecular_function+++biological_process	[Cellular Component]---organelle+++cell part+++cell+++[Molecular Function]---binding+++catalytic activity+++[Biological Process]---cellular process+++metabolic process
174125	slc-36.5	mRNA	[Cellular Component]---GO:0016021///integral component of membrane+++GO:0016020///membrane+++[Molecular Function]---GO:0015171///amino acid transmembrane transporter activity+++[Biological Process]---GO:0003333///amino acid transmembrane transport	cellular_component+++molecular_function+++biological_process	[Cellular Component]---membrane part+++membrane+++[Molecular Function]---transporter activity+++[Biological Process]---localization
174559	ZK892.4	mRNA	[Molecular Function]---GO:0016740///transferase activity+++GO:0003824///catalytic activity	molecular_function	[Molecular Function]---catalytic activity
173272	gpdh-1	mRNA	[Cellular Component]---GO:0009331///glycerol-3-phosphate dehydrogenase complex+++GO:0005829///cytosol+++[Molecular Function]---GO:0042803///protein homodimerization activity+++GO:0051287///NAD binding+++GO:0047952///glycerol-3-phosphate dehydrogenase [NAD(P)+] activity+++GO:0016491///oxidoreductase activity+++GO:0016616///oxidoreductase activity, acting on the CH-OH group of donors, NAD or NADP a…	cellular_component+++molecular_function+++biological_process	[Cellular Component]---protein-containing complex+++cell part+++cell+++[Molecular Function]---binding+++catalytic activity+++[Biological Process]---cellular process+++metabolic process
177983	ZK596.2	mRNA	[Cellular Component]---GO:0005737///cytoplasm+++GO:0005634///nucleus+++[Molecular Function]---GO:0004674///protein serine/threonine kinase activity+++GO:0000166///nucleotide binding+++GO:0004672///protein kinase activity+++GO:0005524///ATP binding+++[Biological Process]---GO:0018107///peptidyl-threonine phosphorylation+++GO:0018105///peptidyl-serine phosphorylation+++GO:0006468///protein phosphor…	cellular_component+++molecular_function+++biological_process	[Cellular Component]---organelle+++cell part+++cell+++[Molecular Function]---binding+++catalytic activity+++[Biological Process]---cellular process+++metabolic process
188025	srh-46	mRNA	[Cellular Component]---GO:0016021///integral component of membrane+++GO:0016020///membrane+++[Biological Process]---GO:0050907///detection of chemical stimulus involved in sensory perception	cellular_component+++biological_process	[Cellular Component]---membrane part+++membrane+++[Biological Process]---multicellular organismal process+++response to stimulus
174326	K01C8.1	mRNA	[Molecular Function]---GO:0004794///L-threonine ammonia-lyase activity+++GO:0003941///L-serine ammonia-lyase activity+++[Biological Process]---GO:0006565///L-serine catabolic process+++GO:0006567///threonine catabolic process	molecular_function+++biological_process	[Molecular Function]---catalytic activity+++[Biological Process]---cellular process+++metabolic process
187528	R02F2.5	mRNA	[Molecular Function]---GO:0005515///protein binding	molecular_function	[Molecular Function]---binding
172532	gld-1	mRNA	[Cellular Component]---GO:0043186///P granule+++GO:0005737///cytoplasm+++GO:0005829///cytosol+++[Molecular Function]---GO:0003723///RNA binding+++GO:0048027///mRNA 5'-UTR binding+++GO:0003730///mRNA 3'-UTR binding+++GO:0003727///single-stranded RNA binding+++GO:0005515///protein binding+++GO:0003676///nucleic acid binding+++[Biological Process]---GO:0030154///cell differentiation+++GO:0010629///n…	cellular_component+++molecular_function+++biological_process	[Cellular Component]---protein-containing complex+++organelle+++cell part+++cell+++[Molecular Function]---binding+++[Biological Process]---reproduction+++multi-organism process+++positive regulation of biological process+++developmental process+++multicellular organismal process+++cellular process+++negative regulation of biological process+++biological regulation+++metabolic process+++reproducti…
175067	K09E4.1	mRNA	[Cellular Component]---GO:0005737///cytoplasm+++GO:0005634///nucleus+++[Molecular Function]---GO:0005515///protein binding+++[Biological Process]---GO:0018107///peptidyl-threonine phosphorylation+++GO:0090090///negative regulation of canonical Wnt signaling pathway+++GO:0032436///positive regulation of proteasomal ubiquitin-dependent protein catabolic process+++GO:0016055///Wnt signaling pathway+…	cellular_component+++molecular_function+++biological_process	[Cellular Component]---organelle+++cell part+++cell+++[Molecular Function]---binding+++[Biological Process]---positive regulation of biological process+++cellular process+++signaling+++negative regulation of biological process+++metabolic process+++biological regulation+++regulation of biological process+++response to stimulus
173883	F58A6.5	mRNA	[Cellular Component]---GO:0016021///integral component of membrane+++GO:0016020///membrane	cellular_component	[Cellular Component]---membrane part+++membrane
180529	dpy-3	mRNA	[Cellular Component]---GO:0016021///integral component of membrane+++GO:0016020///membrane+++[Molecular Function]---GO:0042302///structural constituent of cuticle+++[Biological Process]---GO:0042338///cuticle development involved in collagen and cuticulin-based cuticle molting cycle	cellular_component+++molecular_function+++biological_process	[Cellular Component]---membrane part+++membrane+++[Molecular Function]---structural molecule activity+++[Biological Process]---developmental process+++multicellular organismal process
178034	col-126	mRNA	[Cellular Component]---GO:0005581///collagen trimer+++[Molecular Function]---GO:0042302///structural constituent of cuticle+++GO:0005198///structural molecule activity	cellular_component+++molecular_function	[Cellular Component]---protein-containing complex+++[Molecular Function]---structural molecule activity
3565540	T28B8.6	mRNA	[Cellular Component]---GO:0016021///integral component of membrane+++GO:0016020///membrane	cellular_component	[Cellular Component]---membrane part+++membrane
185806	otpl-5	mRNA	[Cellular Component]---GO:0016021///integral component of membrane+++GO:0016020///membrane	cellular_component	[Cellular Component]---membrane part+++membrane
174947	puf-6	mRNA	[Cellular Component]---GO:0005737///cytoplasm+++[Molecular Function]---GO:0003723///RNA binding+++GO:0003730///mRNA 3'-UTR binding+++[Biological Process]---GO:0030154///cell differentiation+++GO:0007281///germ cell development+++GO:0006417///regulation of translation+++GO:0008285///negative regulation of cell proliferation+++GO:0007275///multicellular organism development+++GO:0006402///mRNA cata…	cellular_component+++molecular_function+++biological_process	[Cellular Component]---cell part+++cell+++[Molecular Function]---binding+++[Biological Process]---reproduction+++multi-organism process+++developmental process+++multicellular organismal process+++cellular process+++negative regulation of biological process+++biological regulation+++metabolic process+++reproductive process+++regulation of biological process+++cell proliferation
175016	Y54G9A.5	mRNA	[Cellular Component]---GO:0016021///integral component of membrane+++GO:0016020///membrane	cellular_component	[Cellular Component]---membrane part+++membrane
181308	col-179	mRNA	[Cellular Component]---GO:0005615///extracellular space+++GO:0016021///integral component of membrane+++GO:0005581///collagen trimer+++GO:0031012///extracellular matrix+++GO:0016020///membrane+++[Molecular Function]---GO:0005201///extracellular matrix structural constituent+++GO:0042302///structural constituent of cuticle+++[Biological Process]---GO:0030198///extracellular matrix organization+++G…	cellular_component+++molecular_function+++biological_process	[Cellular Component]---extracellular region part+++protein-containing complex+++membrane part+++extracellular region+++membrane+++[Molecular Function]---structural molecule activity+++[Biological Process]---cellular process+++immune system process+++cellular component organization or biogenesis+++response to stimulus
184699	F19H6.4	mRNA	[Cellular Component]---GO:0016021///integral component of membrane+++GO:0005737///cytoplasm+++GO:0016020///membrane+++[Molecular Function]---GO:0016491///oxidoreductase activity+++GO:0003865///3-oxo-5-alpha-steroid 4-dehydrogenase activity+++GO:0016627///oxidoreductase activity, acting on the CH-CH group of donors+++[Biological Process]---GO:0006694///steroid biosynthetic process+++GO:0006629///l…	cellular_component+++molecular_function+++biological_process	[Cellular Component]---cell part+++membrane part+++membrane+++cell+++[Molecular Function]---catalytic activity+++[Biological Process]---metabolic process
185664	F42C5.5	mRNA	[Molecular Function]---GO:0004725///protein tyrosine phosphatase activity+++[Biological Process]---GO:0035335///peptidyl-tyrosine dephosphorylation+++GO:0006470///protein dephosphorylation	molecular_function+++biological_process	[Molecular Function]---catalytic activity+++[Biological Process]---cellular process+++metabolic process
180484	D1005.2	mRNA	[Cellular Component]---GO:0005737///cytoplasm+++[Molecular Function]---GO:0070569///uridylyltransferase activity+++GO:0016779///nucleotidyltransferase activity+++GO:0003983///UTP:glucose-1-phosphate uridylyltransferase activity+++GO:0016740///transferase activity+++[Biological Process]---GO:0005977///glycogen metabolic process+++GO:0006011///UDP-glucose metabolic process	cellular_component+++molecular_function+++biological_process	[Cellular Component]---cell part+++cell+++[Molecular Function]---catalytic activity+++[Biological Process]---cellular process+++metabolic process
171937	ipla-4	mRNA	[Molecular Function]---GO:0016787///hydrolase activity+++[Biological Process]---GO:0006629///lipid metabolic process+++GO:0016042///lipid catabolic process	molecular_function+++biological_process	[Molecular Function]---catalytic activity+++[Biological Process]---metabolic process
183619	irg-2	mRNA	[Biological Process]---GO:0045087///innate immune response	biological_process	[Biological Process]---immune system process+++response to stimulus
191496	nhr-245	mRNA	[Cellular Component]---GO:0005634///nucleus+++[Molecular Function]---GO:0008270///zinc ion binding+++GO:0003700///DNA-binding transcription factor activity+++GO:0043565///sequence-specific DNA binding+++[Biological Process]---GO:0006351///transcription, DNA-templated	cellular_component+++molecular_function+++biological_process	[Cellular Component]---organelle+++cell part+++cell+++[Molecular Function]---binding+++transcription regulator activity+++[Biological Process]---cellular process+++metabolic process
3896784	C55C3.8	mRNA	[Cellular Component]---GO:0005886///plasma membrane+++GO:0005634///nucleus+++GO:0005737///cytoplasm+++[Molecular Function]---GO:0004674///protein serine/threonine kinase activity+++GO:0004672///protein kinase activity+++GO:0005524///ATP binding+++[Biological Process]---GO:0035556///intracellular signal transduction+++GO:0019221///cytokine-mediated signaling pathway+++GO:0006468///protein phosphor…	cellular_component+++molecular_function+++biological_process	[Cellular Component]---organelle+++cell part+++membrane+++cell+++[Molecular Function]---binding+++catalytic activity+++[Biological Process]---cellular process+++signaling+++biological regulation+++metabolic process+++regulation of biological process+++response to stimulus
177619	vit-6	mRNA	[Cellular Component]---GO:0005576///extracellular region+++[Molecular Function]---GO:0045735///nutrient reservoir activity+++GO:0005319///lipid transporter activity+++[Biological Process]---GO:0006869///lipid transport+++GO:1904109///positive regulation of cholesterol import+++GO:1903427///negative regulation of reactive oxygen species biosynthetic process+++GO:1904807///negative regulation of pr…	cellular_component+++molecular_function+++biological_process	[Cellular Component]---extracellular region+++[Molecular Function]---transporter activity+++nutrient reservoir activity+++[Biological Process]---positive regulation of biological process+++cellular process+++negative regulation of biological process+++biological regulation+++metabolic process+++regulation of biological process+++localization
181574	tatn-1	mRNA	[Molecular Function]---GO:0008483///transaminase activity+++GO:0004838///L-tyrosine:2-oxoglutarate aminotransferase activity+++GO:0030170///pyridoxal phosphate binding+++GO:0016740///transferase activity+++GO:0003824///catalytic activity+++[Biological Process]---GO:0009058///biosynthetic process+++GO:0043053///dauer entry+++GO:0006520///cellular amino acid metabolic process+++GO:0009072///aromati…	molecular_function+++biological_process	[Molecular Function]---binding+++catalytic activity+++[Biological Process]---developmental process+++multicellular organismal process+++cellular process+++metabolic process
259387	DY3.8	mRNA	[Cellular Component]---GO:0016021///integral component of membrane+++GO:0016020///membrane	cellular_component	[Cellular Component]---membrane part+++membrane
178637	cnc-2	mRNA	[Cellular Component]---GO:0005615///extracellular space+++GO:0016021///integral component of membrane+++GO:0016020///membrane+++[Molecular Function]---GO:0003674///molecular_function+++[Biological Process]---GO:0045087///innate immune response	cellular_component+++molecular_function+++biological_process	[Cellular Component]---extracellular region part+++membrane part+++extracellular region+++membrane+++[Molecular Function]---molecular_function+++[Biological Process]---immune system process+++response to stimulus
186269	F54H12.5	mRNA	[Cellular Component]---GO:0005575///cellular_component+++[Molecular Function]---GO:0003674///molecular_function+++[Biological Process]---GO:0008150///biological_process	cellular_component+++molecular_function+++biological_process	[Cellular Component]---cellular_component+++[Molecular Function]---molecular_function+++[Biological Process]---biological_process
184745	F20G2.5	mRNA	[Cellular Component]---GO:0045121///membrane raft+++[Biological Process]---GO:0045087///innate immune response	cellular_component+++biological_process	[Cellular Component]---membrane part+++membrane+++[Biological Process]---immune system process+++response to stimulus
178246	F55G11.7	mRNA	[Biological Process]---GO:0045087///innate immune response	biological_process	[Biological Process]---immune system process+++response to stimulus
186732	H12I13.1	mRNA	[Molecular Function]---GO:0036459///thiol-dependent ubiquitinyl hydrolase activity+++GO:0004672///protein kinase activity+++GO:0005524///ATP binding+++[Biological Process]---GO:0006511///ubiquitin-dependent protein catabolic process+++GO:0016579///protein deubiquitination+++GO:0006468///protein phosphorylation	molecular_function+++biological_process	[Molecular Function]---binding+++catalytic activity+++[Biological Process]---cellular process+++metabolic process
182419	C08F11.3	mRNA	[Cellular Component]---GO:0016021///integral component of membrane+++GO:0016020///membrane	cellular_component	[Cellular Component]---membrane part+++membrane
179351	col-147	mRNA	[Cellular Component]---GO:0016021///integral component of membrane+++GO:0005581///collagen trimer+++GO:0016020///membrane+++[Molecular Function]---GO:0042302///structural constituent of cuticle	cellular_component+++molecular_function	[Cellular Component]---protein-containing complex+++membrane part+++membrane+++[Molecular Function]---structural molecule activity
189092	W01D2.3	mRNA	[Cellular Component]---GO:0016021///integral component of membrane+++GO:0016020///membrane	cellular_component	[Cellular Component]---membrane part+++membrane
187844	R12G8.1	mRNA	[Cellular Component]---GO:0005622///intracellular+++GO:0016020///membrane+++[Molecular Function]---GO:0046872///metal ion binding+++[Biological Process]---GO:0035556///intracellular signal transduction	cellular_component+++molecular_function+++biological_process	[Cellular Component]---cell part+++membrane+++cell+++[Molecular Function]---binding+++[Biological Process]---cellular process+++signaling+++biological regulation+++regulation of biological process+++response to stimulus
173011	clec-99	mRNA	[Molecular Function]---GO:0030246///carbohydrate binding	molecular_function	[Molecular Function]---binding
174561	F52H3.6	mRNA	[Cellular Component]---GO:0005694///chromosome+++GO:0031965///nuclear membrane+++GO:0005634///nucleus+++GO:0005737///cytoplasm+++GO:0000164///protein phosphatase type 1 complex+++GO:0072357///PTW/PP1 phosphatase complex+++[Molecular Function]---GO:0016787///hydrolase activity+++GO:0004721///phosphoprotein phosphatase activity+++[Biological Process]---GO:0006470///protein dephosphorylation	cellular_component+++molecular_function+++biological_process	[Cellular Component]---protein-containing complex+++organelle+++cell part+++membrane+++cell+++organelle part+++[Molecular Function]---catalytic activity+++[Biological Process]---cellular process+++metabolic process
185408	gst-12	mRNA	[Molecular Function]---GO:0016740///transferase activity	molecular_function	[Molecular Function]---catalytic activity
189799	Y40H4A.2	mRNA	[Molecular Function]---GO:0016787///hydrolase activity	molecular_function	[Molecular Function]---catalytic activity
180889	daf-9	mRNA	[Cellular Component]---GO:0043025///neuronal cell body+++GO:0016021///integral component of membrane+++GO:0048471///perinuclear region of cytoplasm+++GO:0005737///cytoplasm+++GO:0043231///intracellular membrane-bounded organelle+++GO:0016020///membrane+++[Molecular Function]---GO:0046872///metal ion binding+++GO:0020037///heme binding+++GO:0016712///oxidoreductase activity, acting on paired donor…	cellular_component+++molecular_function+++biological_process	[Cellular Component]---organelle+++cell part+++membrane part+++membrane+++cell+++[Molecular Function]---binding+++catalytic activity+++[Biological Process]---developmental process+++multicellular organismal process+++cellular process+++signaling+++biological regulation+++metabolic process+++regulation of biological process+++response to stimulus+++localization+++locomotion
188911	wht-6	mRNA	[Cellular Component]---GO:0016021///integral component of membrane+++GO:0005886///plasma membrane+++GO:0016324///apical plasma membrane+++GO:0043235///receptor complex+++GO:0016020///membrane+++[Molecular Function]---GO:0015238///drug transmembrane transporter activity+++GO:0017127///cholesterol transporter activity+++GO:0000166///nucleotide binding+++GO:0016887///ATPase activity+++GO:0042626///A…	cellular_component+++molecular_function+++biological_process	[Cellular Component]---protein-containing complex+++cell part+++membrane part+++cell+++membrane+++[Molecular Function]---transporter activity+++binding+++catalytic activity+++[Biological Process]---cellular process+++pigmentation+++metabolic process+++response to stimulus+++localization
191712	msp-152	mRNA	[Cellular Component]---GO:0005856///cytoskeleton+++GO:0042995///cell projection+++GO:0031143///pseudopodium+++GO:0005737///cytoplasm	cellular_component	[Cellular Component]---organelle+++cell part+++cell
181856	B0222.1	mRNA	[Cellular Component]---GO:0016021///integral component of membrane+++GO:0016020///membrane	cellular_component	[Cellular Component]---membrane part+++membrane
175626	F17C8.6	mRNA	[Cellular Component]---GO:0005886///plasma membrane+++GO:0016021///integral component of membrane+++[Molecular Function]---GO:0005261///cation channel activity+++[Biological Process]---GO:0034220///ion transmembrane transport+++GO:0098655///cation transmembrane transport	cellular_component+++molecular_function+++biological_process	[Cellular Component]---cell part+++membrane part+++cell+++membrane+++[Molecular Function]---transporter activity+++[Biological Process]---localization
176759	T03F6.6	mRNA	[Cellular Component]---GO:0016021///integral component of membrane+++GO:0016020///membrane	cellular_component	[Cellular Component]---membrane part+++membrane
177958	fmo-2	mRNA	[Cellular Component]---GO:0031090///organelle membrane+++GO:0016021///integral component of membrane+++GO:0005783///endoplasmic reticulum+++GO:0005737///cytoplasm+++GO:0043231///intracellular membrane-bounded organelle+++GO:0016020///membrane+++GO:0005789///endoplasmic reticulum membrane+++[Molecular Function]---GO:0004499///N,N-dimethylaniline monooxygenase activity+++GO:0016491///oxidoreductase…	cellular_component+++molecular_function+++biological_process	[Cellular Component]---organelle+++cell part+++membrane part+++membrane+++cell+++organelle part+++[Molecular Function]---binding+++catalytic activity+++[Biological Process]---metabolic process
182859	C24H11.1	mRNA	[Molecular Function]---GO:0016787///hydrolase activity+++GO:0004721///phosphoprotein phosphatase activity+++[Biological Process]---GO:0006470///protein dephosphorylation	molecular_function+++biological_process	[Molecular Function]---catalytic activity+++[Biological Process]---cellular process+++metabolic process
187705	cyp-33C8	mRNA	[Molecular Function]---GO:0016705///oxidoreductase activity, acting on paired donors, with incorporation or reduction of molecular oxygen+++GO:0008395///steroid hydroxylase activity+++GO:0020037///heme binding+++GO:0005506///iron ion binding	molecular_function	[Molecular Function]---binding+++catalytic activity
187856	ttr-8	mRNA	[Cellular Component]---GO:0005615///extracellular space	cellular_component	[Cellular Component]---extracellular region part+++extracellular region
177098	W08E12.3	mRNA	[Molecular Function]---GO:0005515///protein binding	molecular_function	[Molecular Function]---binding
191170	ZC443.4	mRNA	[Cellular Component]---GO:0005852///eukaryotic translation initiation factor 3 complex+++[Molecular Function]---GO:0003743///translation initiation factor activity+++GO:0003723///RNA binding+++GO:0031369///translation initiation factor binding+++[Biological Process]---GO:0006413///translational initiation	cellular_component+++molecular_function+++biological_process	[Cellular Component]---protein-containing complex+++cell part+++cell+++[Molecular Function]---binding+++[Biological Process]---cellular process+++metabolic process
179269	mod-1	mRNA	[Cellular Component]---GO:0043025///neuronal cell body+++GO:0016021///integral component of membrane+++GO:0005886///plasma membrane+++GO:0045202///synapse+++GO:0005887///integral component of plasma membrane+++GO:0043005///neuron projection+++GO:0016020///membrane+++[Molecular Function]---GO:0004888///transmembrane signaling receptor activity+++GO:0005230///extracellular ligand-gated ion channel …	cellular_component+++molecular_function+++biological_process	[Cellular Component]---cell part+++membrane part+++synapse+++cell+++membrane+++[Molecular Function]---transporter activity+++molecular transducer activity+++[Biological Process]---positive regulation of biological process+++multicellular organismal process+++cellular process+++signaling+++metabolic process+++biological regulation+++regulation of biological process+++response to stimulus+++localiz…
4363131	C36E6.8	mRNA	[Cellular Component]---GO:0016021///integral component of membrane+++GO:0016020///membrane	cellular_component	[Cellular Component]---membrane part+++membrane
174857	rol-1	mRNA	[Cellular Component]---GO:0016021///integral component of membrane+++GO:0016020///membrane+++[Molecular Function]---GO:0042302///structural constituent of cuticle	cellular_component+++molecular_function	[Cellular Component]---membrane part+++membrane+++[Molecular Function]---structural molecule activity
187223	K09E3.7	mRNA	[Cellular Component]---GO:0005634///nucleus	cellular_component	[Cellular Component]---organelle+++cell part+++cell
179806	odr-3	mRNA	[Cellular Component]---GO:0097730///non-motile cilium+++GO:0005929///cilium+++GO:0043025///neuronal cell body+++GO:0030425///dendrite+++GO:0042995///cell projection+++GO:0005834///heterotrimeric G-protein complex+++[Molecular Function]---GO:0019001///guanyl nucleotide binding+++GO:0046872///metal ion binding+++GO:0031683///G-protein beta/gamma-subunit complex binding+++GO:0000166///nucleotide bin…	cellular_component+++molecular_function+++biological_process	[Cellular Component]---protein-containing complex+++organelle+++cell part+++membrane part+++cell+++membrane+++[Molecular Function]---binding+++catalytic activity+++[Biological Process]---multicellular organismal process+++cellular process+++signaling+++biological regulation+++regulation of biological process+++cellular component organization or biogenesis+++behavior+++response to stimulus+++locom…
175865	Y42G9A.3	mRNA	[Cellular Component]---GO:0005737///cytoplasm+++GO:0016323///basolateral plasma membrane+++[Biological Process]---GO:0045199///maintenance of epithelial cell apical/basal polarity+++GO:0007165///signal transduction	cellular_component+++biological_process	[Cellular Component]---cell part+++membrane part+++membrane+++cell+++[Biological Process]---regulation of biological process+++cellular process+++response to stimulus+++signaling+++biological regulation
185746	clp-8	mRNA	[Cellular Component]---GO:0005737///cytoplasm+++[Molecular Function]---GO:0008233///peptidase activity+++GO:0016787///hydrolase activity+++GO:0008234///cysteine-type peptidase activity+++GO:0004198///calcium-dependent cysteine-type endopeptidase activity+++[Biological Process]---GO:0006508///proteolysis	cellular_component+++molecular_function+++biological_process	[Cellular Component]---cell part+++cell+++[Molecular Function]---catalytic activity+++[Biological Process]---metabolic process
178355	Y37A1A.2	mRNA	[Cellular Component]---GO:0016021///integral component of membrane+++GO:0016020///membrane	cellular_component	[Cellular Component]---membrane part+++membrane
189146	oac-51	mRNA	[Cellular Component]---GO:0016021///integral component of membrane+++GO:0016020///membrane+++[Molecular Function]---GO:0016746///transferase activity, transferring acyl groups+++GO:0016747///transferase activity, transferring acyl groups other than amino-acyl groups+++GO:0016740///transferase activity+++[Biological Process]---GO:0033692///cellular polysaccharide biosynthetic process	cellular_component+++molecular_function+++biological_process	[Cellular Component]---membrane part+++membrane+++[Molecular Function]---catalytic activity+++[Biological Process]---cellular process+++metabolic process
179100	fat-7	mRNA	[Cellular Component]---GO:0016021///integral component of membrane+++GO:0016020///membrane+++GO:0005789///endoplasmic reticulum membrane+++[Molecular Function]---GO:0004768///stearoyl-CoA 9-desaturase activity+++GO:0005506///iron ion binding+++GO:0016491///oxidoreductase activity+++GO:0016717///oxidoreductase activity, acting on paired donors, with oxidation of a pair of donors resulting in the r…	cellular_component+++molecular_function+++biological_process	[Cellular Component]---organelle+++cell part+++membrane part+++cell+++membrane+++organelle part+++[Molecular Function]---binding+++catalytic activity+++[Biological Process]---developmental process+++multicellular organismal process+++cellular process+++metabolic process
176585	ztf-29	mRNA	[Molecular Function]---GO:0003676///nucleic acid binding	molecular_function	[Molecular Function]---binding
3565034	glb-19	mRNA	[Molecular Function]---GO:0020037///heme binding+++GO:0005344///oxygen carrier activity+++GO:0019825///oxygen binding+++[Biological Process]---GO:0015671///oxygen transport	molecular_function+++biological_process	[Molecular Function]---binding+++molecular carrier activity+++[Biological Process]---response to stimulus+++localization
171648	lpr-1	mRNA	[Cellular Component]---GO:0005576///extracellular region+++[Biological Process]---GO:0006869///lipid transport+++GO:0002119///nematode larval development+++GO:0035295///tube development	cellular_component+++biological_process	[Cellular Component]---extracellular region+++[Biological Process]---developmental process+++multicellular organismal process+++localization
181855	clec-52	mRNA	[Cellular Component]---GO:0005887///integral component of plasma membrane+++[Molecular Function]---GO:0004888///transmembrane signaling receptor activity+++GO:0030246///carbohydrate binding+++[Biological Process]---GO:0050830///defense response to Gram-positive bacterium	cellular_component+++molecular_function+++biological_process	[Cellular Component]---cell part+++membrane part+++cell+++membrane+++[Molecular Function]---binding+++molecular transducer activity+++[Biological Process]---multi-organism process+++response to stimulus
172470	ztf-15	mRNA	[Molecular Function]---GO:0003676///nucleic acid binding	molecular_function	[Molecular Function]---binding
3565933	Y51A2D.21	mRNA	[Cellular Component]---GO:0016021///integral component of membrane+++GO:0016020///membrane	cellular_component	[Cellular Component]---membrane part+++membrane
185762	F44G4.6	mRNA	[Cellular Component]---GO:0016021///integral component of membrane+++GO:0016020///membrane	cellular_component	[Cellular Component]---membrane part+++membrane
3896821	K11D12.13	mRNA	[Molecular Function]---GO:0004867///serine-type endopeptidase inhibitor activity+++[Biological Process]---GO:0010951///negative regulation of endopeptidase activity	molecular_function+++biological_process	[Molecular Function]---molecular function regulator+++[Biological Process]---cellular process+++negative regulation of biological process+++biological regulation+++metabolic process+++regulation of biological process
178748	zmp-3	mRNA	[Cellular Component]---GO:0005576///extracellular region+++GO:0031012///extracellular matrix+++[Molecular Function]---GO:0046872///metal ion binding+++GO:0008270///zinc ion binding+++GO:0004222///metalloendopeptidase activity+++GO:0008237///metallopeptidase activity+++GO:0008233///peptidase activity+++GO:0016787///hydrolase activity+++[Biological Process]---GO:0006508///proteolysis	cellular_component+++molecular_function+++biological_process	[Cellular Component]---extracellular region part+++extracellular region+++[Molecular Function]---binding+++catalytic activity+++[Biological Process]---metabolic process
191292	msp-51	mRNA	[Cellular Component]---GO:0031143///pseudopodium+++GO:0005856///cytoskeleton+++GO:0005737///cytoplasm	cellular_component	[Cellular Component]---organelle+++cell part+++cell
183570	C48B6.4	mRNA	[Molecular Function]---GO:0004725///protein tyrosine phosphatase activity+++[Biological Process]---GO:0035335///peptidyl-tyrosine dephosphorylation+++GO:0006470///protein dephosphorylation	molecular_function+++biological_process	[Molecular Function]---catalytic activity+++[Biological Process]---cellular process+++metabolic process
172324	C10G11.8	mRNA	[Cellular Component]---GO:0008540///proteasome regulatory particle, base subcomplex+++GO:0005737///cytoplasm+++[Molecular Function]---GO:0000166///nucleotide binding+++GO:0016787///hydrolase activity+++GO:0036402///proteasome-activating ATPase activity+++GO:0005524///ATP binding+++GO:0017025///TBP-class protein binding+++[Biological Process]---GO:0030163///protein catabolic process+++GO:1901800//…	cellular_component+++molecular_function+++biological_process	[Cellular Component]---protein-containing complex+++cell part+++cell+++[Molecular Function]---binding+++catalytic activity+++[Biological Process]---positive regulation of biological process+++cellular process+++biological regulation+++metabolic process+++regulation of biological process
182456	C09F9.2	mRNA	[Cellular Component]---GO:0016021///integral component of membrane+++GO:0016020///membrane	cellular_component	[Cellular Component]---membrane part+++membrane
184913	F25A2.1	mRNA	[Molecular Function]---GO:0016787///hydrolase activity+++[Biological Process]---GO:0006629///lipid metabolic process	molecular_function+++biological_process	[Molecular Function]---catalytic activity+++[Biological Process]---metabolic process
191005	Y116A8C.29	mRNA	[Cellular Component]---GO:0016021///integral component of membrane+++GO:0016020///membrane	cellular_component	[Cellular Component]---membrane part+++membrane
3565709	B0361.11	mRNA	[Cellular Component]---GO:0016021///integral component of membrane+++GO:0016020///membrane+++[Molecular Function]---GO:0022857///transmembrane transporter activity+++GO:0005215///transporter activity+++[Biological Process]---GO:0055085///transmembrane transport+++GO:0008643///carbohydrate transport	cellular_component+++molecular_function+++biological_process	[Cellular Component]---membrane part+++membrane+++[Molecular Function]---transporter activity+++[Biological Process]---localization
175257	pef-1	mRNA	[Cellular Component]---GO:0043204///perikaryon+++GO:0030424///axon+++GO:0005929///cilium+++GO:0043025///neuronal cell body+++GO:0030425///dendrite+++GO:0005886///plasma membrane+++GO:0042995///cell projection+++GO:0005829///cytosol+++GO:0016020///membrane+++[Molecular Function]---GO:0046872///metal ion binding+++GO:0030145///manganese ion binding+++GO:0005506///iron ion binding+++GO:0016787///hyd…	cellular_component+++molecular_function+++biological_process	[Cellular Component]---organelle+++cell part+++membrane+++cell+++[Molecular Function]---binding+++catalytic activity+++[Biological Process]---multicellular organismal process+++cellular process+++metabolic process+++response to stimulus
172494	col-7	mRNA	[Cellular Component]---GO:0005581///collagen trimer+++[Molecular Function]---GO:0042302///structural constituent of cuticle	cellular_component+++molecular_function	[Cellular Component]---protein-containing complex+++[Molecular Function]---structural molecule activity
178244	C32H11.4	mRNA	[Biological Process]---GO:0045087///innate immune response	biological_process	[Biological Process]---immune system process+++response to stimulus
191809	srd-20	mRNA	[Cellular Component]---GO:0016021///integral component of membrane+++GO:0016020///membrane	cellular_component	[Cellular Component]---membrane part+++membrane
178884	C02E7.7	mRNA	[Cellular Component]---GO:0060106///cortical layer of collagen and cuticulin-based cuticle extracellular matrix+++[Molecular Function]---GO:0042302///structural constituent of cuticle	cellular_component+++molecular_function	[Cellular Component]---extracellular region part+++extracellular region+++[Molecular Function]---structural molecule activity
185396	F36H12.10	mRNA	[Molecular Function]---GO:0016787///hydrolase activity+++GO:0004721///phosphoprotein phosphatase activity+++GO:0004725///protein tyrosine phosphatase activity+++GO:0016791///phosphatase activity+++[Biological Process]---GO:0016311///dephosphorylation+++GO:0035335///peptidyl-tyrosine dephosphorylation+++GO:0006470///protein dephosphorylation	molecular_function+++biological_process	[Molecular Function]---catalytic activity+++[Biological Process]---cellular process+++metabolic process
173888	msp-49	mRNA	[Cellular Component]---GO:0005856///cytoskeleton+++GO:0042995///cell projection+++GO:0031143///pseudopodium+++GO:0005737///cytoplasm	cellular_component	[Cellular Component]---organelle+++cell part+++cell
175596	pan-1	mRNA	[Cellular Component]---GO:0016021///integral component of membrane+++GO:0005886///plasma membrane+++GO:0016324///apical plasma membrane+++GO:0043186///P granule+++GO:0005737///cytoplasm+++GO:0016020///membrane+++[Molecular Function]---GO:0017151///DEAD/H-box RNA helicase binding+++[Biological Process]---GO:0007281///germ cell development+++GO:0007275///multicellular organism development+++GO:0018…	cellular_component+++molecular_function+++biological_process	[Cellular Component]---protein-containing complex+++organelle+++cell part+++membrane part+++membrane+++cell+++[Molecular Function]---binding+++[Biological Process]---reproduction+++multi-organism process+++developmental process+++cellular process+++multicellular organismal process+++reproductive process
190279	Y54G2A.13	mRNA	[Cellular Component]---GO:0016021///integral component of membrane+++GO:0016020///membrane	cellular_component	[Cellular Component]---membrane part+++membrane
185407	gst-24	mRNA	[Molecular Function]---GO:0016740///transferase activity+++[Biological Process]---GO:0045087///innate immune response	molecular_function+++biological_process	[Molecular Function]---catalytic activity+++[Biological Process]---immune system process+++response to stimulus
187558	R03H10.6	mRNA	[Molecular Function]---GO:0003690///double-stranded DNA binding	molecular_function	[Molecular Function]---binding
171848	W03D8.3	mRNA	[Cellular Component]---GO:0016021///integral component of membrane+++GO:0016020///membrane	cellular_component	[Cellular Component]---membrane part+++membrane
179207	C16D9.1	mRNA	[Biological Process]---GO:0042335///cuticle development+++GO:0002064///epithelial cell development	biological_process	[Biological Process]---developmental process+++multicellular organismal process+++cellular process
183956	msrp-5	mRNA	[Cellular Component]---GO:0016021///integral component of membrane+++GO:0016020///membrane	cellular_component	[Cellular Component]---membrane part+++membrane
171660	Y18H1A.1	mRNA	[Molecular Function]---GO:0004725///protein tyrosine phosphatase activity+++[Biological Process]---GO:0035335///peptidyl-tyrosine dephosphorylation+++GO:0006470///protein dephosphorylation	molecular_function+++biological_process	[Molecular Function]---catalytic activity+++[Biological Process]---cellular process+++metabolic process
180258	Y39B6A.10	mRNA	[Cellular Component]---GO:0016021///integral component of membrane+++GO:0016020///membrane	cellular_component	[Cellular Component]---membrane part+++membrane
188688	ttr-23	mRNA	[Cellular Component]---GO:0005615///extracellular space	cellular_component	[Cellular Component]---extracellular region part+++extracellular region
178206	ZK795.2	mRNA	[Cellular Component]---GO:0016021///integral component of membrane+++GO:0016020///membrane+++[Molecular Function]---GO:0097153///cysteine-type endopeptidase activity involved in apoptotic process	cellular_component+++molecular_function	[Cellular Component]---membrane part+++membrane+++[Molecular Function]---catalytic activity
181923	B0310.3	mRNA	[Cellular Component]---GO:0016021///integral component of membrane+++GO:0016020///membrane	cellular_component	[Cellular Component]---membrane part+++membrane
266855	C34F11.5	mRNA	[Cellular Component]---GO:0031234///extrinsic component of cytoplasmic side of plasma membrane+++[Molecular Function]---GO:0004713///protein tyrosine kinase activity+++GO:0000166///nucleotide binding+++GO:0004715///non-membrane spanning protein tyrosine kinase activity+++GO:0004672///protein kinase activity+++GO:0016740///transferase activity+++GO:0005524///ATP binding+++GO:0016301///kinase activ…	cellular_component+++molecular_function+++biological_process	[Cellular Component]---cell+++cell part+++membrane+++membrane part+++[Molecular Function]---binding+++catalytic activity+++[Biological Process]---cellular process+++metabolic process
191208	ZK6.8	mRNA	[Cellular Component]---GO:0016021///integral component of membrane+++GO:0016020///membrane	cellular_component	[Cellular Component]---membrane part+++membrane
178264	best-1	mRNA	[Cellular Component]---GO:0016021///integral component of membrane+++GO:0005886///plasma membrane+++GO:0034707///chloride channel complex+++GO:0016020///membrane+++[Molecular Function]---GO:0005254///chloride channel activity+++[Biological Process]---GO:1902476///chloride transmembrane transport+++GO:0006821///chloride transport+++GO:0006811///ion transport	cellular_component+++molecular_function+++biological_process	[Cellular Component]---protein-containing complex+++cell part+++membrane part+++cell+++membrane+++[Molecular Function]---transporter activity+++[Biological Process]---localization
174324	F35C11.3	mRNA	[Cellular Component]---GO:0005737///cytoplasm+++GO:0005634///nucleus+++[Molecular Function]---GO:0004672///protein kinase activity+++GO:0005524///ATP binding+++[Biological Process]---GO:0018107///peptidyl-threonine phosphorylation+++GO:0018105///peptidyl-serine phosphorylation+++GO:0006468///protein phosphorylation	cellular_component+++molecular_function+++biological_process	[Cellular Component]---organelle+++cell part+++cell+++[Molecular Function]---binding+++catalytic activity+++[Biological Process]---cellular process+++metabolic process
184269	col-91	mRNA	[Cellular Component]---GO:0005581///collagen trimer+++[Molecular Function]---GO:0042302///structural constituent of cuticle	cellular_component+++molecular_function	[Cellular Component]---protein-containing complex+++[Molecular Function]---structural molecule activity
179217	mom-2	mRNA	[Cellular Component]---GO:0005615///extracellular space+++GO:0005576///extracellular region+++GO:0005623///cell+++[Molecular Function]---GO:0030971///receptor tyrosine kinase binding+++GO:0005102///signaling receptor binding+++GO:0005109///frizzled binding+++[Biological Process]---GO:0045165///cell fate commitment+++GO:0030182///neuron differentiation+++GO:1904936///interneuron migration+++GO:001…	cellular_component+++molecular_function+++biological_process	[Cellular Component]---extracellular region part+++extracellular region+++cell+++[Molecular Function]---binding+++[Biological Process]---positive regulation of biological process+++developmental process+++multicellular organismal process+++cellular process+++signaling+++biological regulation+++regulation of biological process+++cellular component organization or biogenesis+++response to stimulus+…
180909	col-169	mRNA	[Cellular Component]---GO:0016021///integral component of membrane+++GO:0005581///collagen trimer+++GO:0016020///membrane+++[Molecular Function]---GO:0042302///structural constituent of cuticle	cellular_component+++molecular_function	[Cellular Component]---protein-containing complex+++membrane part+++membrane+++[Molecular Function]---structural molecule activity
178800	C17E7.12	mRNA	[Cellular Component]---GO:0016021///integral component of membrane+++GO:0016020///membrane	cellular_component	[Cellular Component]---membrane part+++membrane
182352	C07A4.3	mRNA	[Cellular Component]---GO:0005615///extracellular space+++GO:0005576///extracellular region	cellular_component	[Cellular Component]---extracellular region part+++extracellular region
190182	clec-92	mRNA	[Molecular Function]---GO:0030246///carbohydrate binding	molecular_function	[Molecular Function]---binding
3565655	K04D7.6	mRNA	[Cellular Component]---GO:0016021///integral component of membrane+++GO:0016020///membrane	cellular_component	[Cellular Component]---membrane part+++membrane
179861	T01D3.3	mRNA	[Cellular Component]---GO:0005576///extracellular region+++[Molecular Function]---GO:0046872///metal ion binding+++GO:0030414///peptidase inhibitor activity+++[Biological Process]---GO:0010466///negative regulation of peptidase activity+++GO:0006801///superoxide metabolic process	cellular_component+++molecular_function+++biological_process	[Cellular Component]---extracellular region+++[Molecular Function]---binding+++molecular function regulator+++[Biological Process]---cellular process+++negative regulation of biological process+++biological regulation+++metabolic process+++regulation of biological process
181318	inx-2	mRNA	[Cellular Component]---GO:0016021///integral component of membrane+++GO:0005886///plasma membrane+++GO:0005921///gap junction+++GO:0030054///cell junction+++GO:0016020///membrane+++[Molecular Function]---GO:0005243///gap junction channel activity+++GO:0055077///gap junction hemi-channel activity+++[Biological Process]---GO:0055085///transmembrane transport+++GO:0006811///ion transport	cellular_component+++molecular_function+++biological_process	[Cellular Component]---cell part+++membrane part+++cell junction+++cell+++membrane+++[Molecular Function]---transporter activity+++[Biological Process]---localization
183097	C31H1.5	mRNA	[Cellular Component]---GO:0005576///extracellular region+++[Molecular Function]---GO:0004623///phospholipase A2 activity+++GO:0005509///calcium ion binding+++[Biological Process]---GO:0006644///phospholipid metabolic process+++GO:0016042///lipid catabolic process+++GO:0050482///arachidonic acid secretion	cellular_component+++molecular_function+++biological_process	[Cellular Component]---extracellular region+++[Molecular Function]---binding+++catalytic activity+++[Biological Process]---cellular process+++metabolic process+++localization
179012	dmd-7	mRNA	[Cellular Component]---GO:0005634///nucleus+++[Molecular Function]---GO:0046872///metal ion binding+++GO:0003700///DNA-binding transcription factor activity+++GO:0003677///DNA binding+++GO:0043565///sequence-specific DNA binding+++[Biological Process]---GO:0006355///regulation of transcription, DNA-templated	cellular_component+++molecular_function+++biological_process	[Cellular Component]---organelle+++cell part+++cell+++[Molecular Function]---transcription regulator activity+++binding+++[Biological Process]---cellular process+++biological regulation+++metabolic process+++regulation of biological process
172607	col-63	mRNA	[Cellular Component]---GO:0016021///integral component of membrane+++GO:0005581///collagen trimer+++GO:0016020///membrane+++[Molecular Function]---GO:0042302///structural constituent of cuticle	cellular_component+++molecular_function	[Cellular Component]---protein-containing complex+++membrane part+++membrane+++[Molecular Function]---structural molecule activity
181502	meg-1	mRNA	[Cellular Component]---GO:0043186///P granule+++[Molecular Function]---GO:0005515///protein binding+++[Biological Process]---GO:1903864///P granule disassembly+++GO:0000003///reproduction+++GO:0032504///multicellular organism reproduction+++GO:0036093///germ cell proliferation	cellular_component+++molecular_function+++biological_process	[Cellular Component]---protein-containing complex+++organelle+++cell part+++cell+++[Molecular Function]---binding+++[Biological Process]---reproduction+++multi-organism process+++developmental process+++cellular process+++multicellular organismal process+++reproductive process+++cellular component organization or biogenesis+++cell proliferation
177014	M70.1	mRNA	[Cellular Component]---GO:0016021///integral component of membrane+++GO:0016020///membrane	cellular_component	[Cellular Component]---membrane part+++membrane
176061	cgh-1	mRNA	[Cellular Component]---GO:0010494///cytoplasmic stress granule+++GO:1990904///ribonucleoprotein complex+++GO:1990124///messenger ribonucleoprotein complex+++GO:0043229///intracellular organelle+++GO:0000932///P-body+++GO:0043186///P granule+++GO:0005737///cytoplasm+++[Molecular Function]---GO:0003723///RNA binding+++GO:0000166///nucleotide binding+++GO:0003724///RNA helicase activity+++GO:0016787…	cellular_component+++molecular_function+++biological_process	[Cellular Component]---protein-containing complex+++organelle+++cell part+++cell+++[Molecular Function]---binding+++catalytic activity+++[Biological Process]---reproduction+++multi-organism process+++developmental process+++multicellular organismal process+++cellular process+++negative regulation of biological process+++biological regulation+++metabolic process+++reproductive process+++regulation…
172276	C06A5.8	mRNA	[Molecular Function]---GO:0046872///metal ion binding+++GO:0005515///protein binding	molecular_function	[Molecular Function]---binding
178832	F32D1.3	mRNA	[Cellular Component]---GO:0016021///integral component of membrane+++GO:0016020///membrane	cellular_component	[Cellular Component]---membrane part+++membrane
24104655	F56D6.22	mRNA	[Cellular Component]---GO:0016021///integral component of membrane+++GO:0016020///membrane	cellular_component	[Cellular Component]---membrane part+++membrane
172784	klp-16	mRNA	[Cellular Component]---GO:0005871///kinesin complex+++GO:0043025///neuronal cell body+++GO:0005874///microtubule+++[Molecular Function]---GO:0003774///motor activity+++GO:0000166///nucleotide binding+++GO:0016887///ATPase activity+++GO:0008017///microtubule binding+++GO:0003777///microtubule motor activity+++GO:0005524///ATP binding+++GO:1990939///ATP-dependent microtubule motor activity+++[Biolo…	cellular_component+++molecular_function+++biological_process	[Cellular Component]---supramolecular complex+++protein-containing complex+++organelle+++cell part+++cell+++organelle part+++[Molecular Function]---binding+++catalytic activity+++[Biological Process]---cellular process
174325	F35C11.5	mRNA	[Cellular Component]---GO:0016021///integral component of membrane+++GO:0005576///extracellular region+++GO:0016020///membrane+++[Molecular Function]---GO:0004623///phospholipase A2 activity+++[Biological Process]---GO:0006644///phospholipid metabolic process+++GO:0050482///arachidonic acid secretion	cellular_component+++molecular_function+++biological_process	[Cellular Component]---membrane part+++extracellular region+++membrane+++[Molecular Function]---catalytic activity+++[Biological Process]---cellular process+++metabolic process+++localization
6418737	F32D8.15	mRNA	[Cellular Component]---GO:0016021///integral component of membrane+++GO:0016020///membrane+++[Molecular Function]---GO:0005246///calcium channel regulator activity	cellular_component+++molecular_function	[Cellular Component]---membrane part+++membrane+++[Molecular Function]---molecular function regulator
183811	nhx-3	mRNA	[Cellular Component]---GO:0016021///integral component of membrane+++GO:0005886///plasma membrane+++GO:0012505///endomembrane system+++GO:0016020///membrane+++[Molecular Function]---GO:0015385///sodium:proton antiporter activity+++GO:0015297///antiporter activity+++GO:0015386///potassium:proton antiporter activity+++GO:0015299///solute:proton antiporter activity+++[Biological Process]---GO:005145…	cellular_component+++molecular_function+++biological_process	[Cellular Component]---cell part+++membrane part+++cell+++membrane+++[Molecular Function]---transporter activity+++[Biological Process]---cellular process+++biological regulation+++localization
178929	snpc-1.3	mRNA	[Cellular Component]---GO:0019185///snRNA-activating protein complex+++[Molecular Function]---GO:0043565///sequence-specific DNA binding+++[Biological Process]---GO:0042795///snRNA transcription by RNA polymerase II+++GO:0042796///snRNA transcription by RNA polymerase III	cellular_component+++molecular_function+++biological_process	[Cellular Component]---protein-containing complex+++organelle+++cell part+++cell+++organelle part+++[Molecular Function]---binding+++[Biological Process]---cellular process+++metabolic process
191624	ceh-40	mRNA	[Cellular Component]---GO:0005634///nucleus+++[Molecular Function]---GO:0003700///DNA-binding transcription factor activity+++GO:0003677///DNA binding+++GO:0043565///sequence-specific DNA binding+++GO:0005515///protein binding+++[Biological Process]---GO:0006355///regulation of transcription, DNA-templated+++GO:0007275///multicellular organism development	cellular_component+++molecular_function+++biological_process	[Cellular Component]---organelle+++cell part+++cell+++[Molecular Function]---transcription regulator activity+++binding+++[Biological Process]---developmental process+++multicellular organismal process+++cellular process+++biological regulation+++metabolic process+++regulation of biological process
172638	D1081.7	mRNA	[Cellular Component]---GO:0000974///Prp19 complex+++GO:0016607///nuclear speck+++GO:0005634///nucleus+++GO:0005737///cytoplasm+++GO:0071007///U2-type catalytic step 2 spliceosome+++GO:0005662///DNA replication factor A complex+++[Molecular Function]---GO:0071987///WD40-repeat domain binding+++GO:0003723///RNA binding+++GO:0000977///RNA polymerase II regulatory region sequence-specific DNA binding…	cellular_component+++molecular_function+++biological_process	[Cellular Component]---protein-containing complex+++organelle+++cell part+++membrane-enclosed lumen+++cell+++organelle part+++[Molecular Function]---transcription regulator activity+++binding+++[Biological Process]---developmental process+++cellular process+++signaling+++negative regulation of biological process+++biological regulation+++metabolic process+++regulation of biological process+++resp…
173728	F54D10.7	mRNA	[Molecular Function]---GO:0042802///identical protein binding+++GO:0005515///protein binding	molecular_function	[Molecular Function]---binding
179009	W06H8.2	mRNA	[Molecular Function]---GO:0010181///FMN binding+++GO:0016491///oxidoreductase activity+++GO:0003824///catalytic activity+++[Biological Process]---GO:0055114///oxidation-reduction process	molecular_function+++biological_process	[Molecular Function]---binding+++catalytic activity+++[Biological Process]---metabolic process
24104567	F41H10.1	mRNA	[Cellular Component]---GO:0016021///integral component of membrane+++GO:0016020///membrane	cellular_component	[Cellular Component]---membrane part+++membrane
175997	B0280.11	mRNA	[Molecular Function]---GO:0016787///hydrolase activity+++GO:0004721///phosphoprotein phosphatase activity+++GO:0004725///protein tyrosine phosphatase activity+++[Biological Process]---GO:0035335///peptidyl-tyrosine dephosphorylation+++GO:0006470///protein dephosphorylation	molecular_function+++biological_process	[Molecular Function]---catalytic activity+++[Biological Process]---cellular process+++metabolic process
182494	npr-3	mRNA	[Cellular Component]---GO:0016021///integral component of membrane+++GO:0005887///integral component of plasma membrane+++GO:0016020///membrane+++[Molecular Function]---GO:0004930///G protein-coupled receptor activity+++GO:0008020///G protein-coupled photoreceptor activity+++[Biological Process]---GO:0009584///detection of visible light+++GO:0071482///cellular response to light stimulus+++GO:0007…	cellular_component+++molecular_function+++biological_process	[Cellular Component]---cell part+++membrane part+++cell+++membrane+++[Molecular Function]---molecular transducer activity+++[Biological Process]---cellular process+++signaling+++biological regulation+++regulation of biological process+++response to stimulus
173884	msp-45	mRNA	[Cellular Component]---GO:0031143///pseudopodium+++GO:0005856///cytoskeleton+++GO:0005737///cytoplasm	cellular_component	[Cellular Component]---organelle+++cell part+++cell
175708	pup-2	mRNA	[Molecular Function]---GO:0050265///RNA uridylyltransferase activity+++GO:0005515///protein binding+++[Biological Process]---GO:0031054///pre-miRNA processing	molecular_function+++biological_process	[Molecular Function]---binding+++catalytic activity+++[Biological Process]---cellular process+++negative regulation of biological process+++biological regulation+++metabolic process+++regulation of biological process
179224	pos-1	mRNA	[Cellular Component]---GO:0043186///P granule+++GO:0005737///cytoplasm+++GO:0005829///cytosol+++[Molecular Function]---GO:0046872///metal ion binding+++GO:0003730///mRNA 3'-UTR binding+++GO:0003727///single-stranded RNA binding+++GO:0003714///transcription corepressor activity+++GO:0008266///poly(U) RNA binding+++[Biological Process]---GO:0000122///negative regulation of transcription by RNA poly…	cellular_component+++molecular_function+++biological_process	[Cellular Component]---protein-containing complex+++organelle+++cell part+++cell+++[Molecular Function]---binding+++transcription regulator activity+++[Biological Process]---positive regulation of biological process+++developmental process+++multicellular organismal process+++cellular process+++negative regulation of biological process+++biological regulation+++metabolic process+++regulation of b…
179138	ftn-1	mRNA	[Cellular Component]---GO:0005794///Golgi apparatus+++GO:0008043///intracellular ferritin complex+++GO:0005737///cytoplasm+++[Molecular Function]---GO:0008198///ferrous iron binding+++GO:0046872///metal ion binding+++GO:0005506///iron ion binding+++GO:0004322///ferroxidase activity+++GO:0042802///identical protein binding+++GO:0016491///oxidoreductase activity+++GO:0005515///protein binding+++GO:…	cellular_component+++molecular_function+++biological_process	[Cellular Component]---protein-containing complex+++organelle+++cell part+++cell+++[Molecular Function]---binding+++catalytic activity+++[Biological Process]---multi-organism process+++developmental process+++multicellular organismal process+++cellular process+++detoxification+++metabolic process+++biological regulation+++response to stimulus+++localization
177781	wrt-3	mRNA	[Cellular Component]---GO:0005576///extracellular region+++[Biological Process]---GO:0007275///multicellular organism development	cellular_component+++biological_process	[Cellular Component]---extracellular region+++[Biological Process]---developmental process+++multicellular organismal process
178689	clec-208	mRNA	[Molecular Function]---GO:0030246///carbohydrate binding	molecular_function	[Molecular Function]---binding
190686	acr-24	mRNA	[Cellular Component]---GO:0016021///integral component of membrane+++GO:0045202///synapse+++GO:0005887///integral component of plasma membrane+++GO:0043005///neuron projection+++GO:0016020///membrane+++[Molecular Function]---GO:0004888///transmembrane signaling receptor activity+++GO:0005230///extracellular ligand-gated ion channel activity+++GO:0005216///ion channel activity+++[Biological Proces…	cellular_component+++molecular_function+++biological_process	[Cellular Component]---cell part+++membrane part+++synapse+++cell+++membrane+++[Molecular Function]---transporter activity+++molecular transducer activity+++[Biological Process]---multicellular organismal process+++cellular process+++signaling+++biological regulation+++regulation of biological process+++response to stimulus+++localization
185895	F47B8.2	mRNA	[Cellular Component]---GO:0016021///integral component of membrane+++GO:0016020///membrane	cellular_component	[Cellular Component]---membrane part+++membrane
174617	F59B10.6	mRNA	[Cellular Component]---GO:0016021///integral component of membrane+++GO:0016020///membrane	cellular_component	[Cellular Component]---membrane part+++membrane
180765	ifa-4	mRNA	[Cellular Component]---GO:0005882///intermediate filament+++GO:0005737///cytoplasm+++[Molecular Function]---GO:0005515///protein binding+++GO:0005198///structural molecule activity	cellular_component+++molecular_function	[Cellular Component]---supramolecular complex+++organelle+++cell+++cell part+++organelle part+++[Molecular Function]---structural molecule activity+++binding
179782	lin-46	mRNA	[Cellular Component]---GO:0045211///postsynaptic membrane+++GO:0030425///dendrite+++GO:0005634///nucleus+++GO:0099572///postsynaptic specialization+++GO:0099634///postsynaptic specialization membrane+++GO:0005737///cytoplasm+++GO:0005829///cytosol+++[Molecular Function]---GO:0061599///molybdopterin molybdotransferase activity+++GO:0032947///protein-containing complex scaffold activity+++GO:006159…	cellular_component+++molecular_function+++biological_process	[Cellular Component]---synapse part+++organelle+++cell part+++membrane part+++synapse+++membrane+++cell+++organelle part+++[Molecular Function]---binding+++catalytic activity+++structural molecule activity+++[Biological Process]---developmental process+++cellular process+++biological regulation+++metabolic process+++regulation of biological process+++cellular component organization or biogenesis+…
179294	F21C10.3	mRNA	[Cellular Component]---GO:0016021///integral component of membrane+++GO:0016020///membrane+++[Molecular Function]---GO:0016740///transferase activity	cellular_component+++molecular_function	[Cellular Component]---membrane part+++membrane+++[Molecular Function]---catalytic activity
3565772	D1022.9	mRNA	[Cellular Component]---GO:0016021///integral component of membrane+++GO:0016020///membrane	cellular_component	[Cellular Component]---membrane part+++membrane
176549	tbx-34	mRNA	[Cellular Component]---GO:0005634///nucleus+++[Molecular Function]---GO:0003700///DNA-binding transcription factor activity+++GO:0003677///DNA binding+++[Biological Process]---GO:0006355///regulation of transcription, DNA-templated	cellular_component+++molecular_function+++biological_process	[Cellular Component]---organelle+++cell part+++cell+++[Molecular Function]---transcription regulator activity+++binding+++[Biological Process]---cellular process+++biological regulation+++metabolic process+++regulation of biological process
173825	msp-3	mRNA	[Cellular Component]---GO:0005856///cytoskeleton+++GO:0042995///cell projection+++GO:0031143///pseudopodium+++GO:0005737///cytoplasm	cellular_component	[Cellular Component]---organelle+++cell part+++cell
185389	F36H9.2	mRNA	[Cellular Component]---GO:0016020///membrane+++[Molecular Function]---GO:0004675///transmembrane receptor protein serine/threonine kinase activity	cellular_component+++molecular_function	[Cellular Component]---membrane+++[Molecular Function]---molecular transducer activity+++catalytic activity
189616	Y37D8A.8	mRNA	[Cellular Component]---GO:0016021///integral component of membrane+++GO:0016020///membrane	cellular_component	[Cellular Component]---membrane part+++membrane
186181	F53F8.4	mRNA	[Molecular Function]---GO:1990817///RNA adenylyltransferase activity	molecular_function	[Molecular Function]---catalytic activity
187697	clec-175	mRNA	[Molecular Function]---GO:0030246///carbohydrate binding	molecular_function	[Molecular Function]---binding
171993	cyb-2.2	mRNA	[Cellular Component]---GO:0000307///cyclin-dependent protein kinase holoenzyme complex+++GO:0005813///centrosome+++GO:0005634///nucleus+++GO:0005737///cytoplasm+++[Molecular Function]---GO:0019901///protein kinase binding+++GO:0004672///protein kinase activity+++GO:0016538///cyclin-dependent protein serine/threonine kinase regulator activity+++[Biological Process]---GO:0000278///mitotic cell cycl…	cellular_component+++molecular_function+++biological_process	[Cellular Component]---protein-containing complex+++organelle+++cell part+++cell+++organelle part+++[Molecular Function]---binding+++catalytic activity+++molecular function regulator+++[Biological Process]---reproduction+++multi-organism process+++positive regulation of biological process+++developmental process+++multicellular organismal process+++cellular process+++biological regulation+++metab…
183168	C33F10.12	mRNA	[Cellular Component]---GO:0016021///integral component of membrane+++GO:0031305///integral component of mitochondrial inner membrane+++GO:0016020///membrane+++[Molecular Function]---GO:0005315///inorganic phosphate transmembrane transporter activity+++GO:0022857///transmembrane transporter activity+++[Biological Process]---GO:0035435///phosphate ion transmembrane transport	cellular_component+++molecular_function+++biological_process	[Cellular Component]---organelle+++cell part+++membrane part+++cell+++membrane+++organelle part+++[Molecular Function]---transporter activity+++[Biological Process]---localization
27219614	C30B5.17	mRNA	[Cellular Component]---GO:0016021///integral component of membrane+++GO:0016020///membrane	cellular_component	[Cellular Component]---membrane part+++membrane
177887	msp-38	mRNA	[Cellular Component]---GO:0005856///cytoskeleton+++GO:0042995///cell projection+++GO:0031143///pseudopodium+++GO:0005737///cytoplasm+++[Biological Process]---GO:0001556///oocyte maturation+++GO:0045987///positive regulation of smooth muscle contraction	cellular_component+++biological_process	[Cellular Component]---organelle+++cell part+++cell+++[Biological Process]---reproduction+++multi-organism process+++positive regulation of biological process+++developmental process+++cellular process+++multicellular organismal process+++biological regulation+++reproductive process+++regulation of biological process
172179	spe-11	mRNA	[Cellular Component]---GO:0048471///perinuclear region of cytoplasm+++GO:0005634///nucleus+++GO:0005737///cytoplasm+++[Molecular Function]---GO:0003674///molecular_function+++[Biological Process]---GO:0030154///cell differentiation+++GO:0060468///prevention of polyspermy+++GO:0030703///eggshell formation+++GO:0007283///spermatogenesis+++GO:0007275///multicellular organism development	cellular_component+++molecular_function+++biological_process	[Cellular Component]---organelle+++cell part+++cell+++[Molecular Function]---molecular_function+++[Biological Process]---reproduction+++multi-organism process+++developmental process+++cellular process+++multicellular organismal process+++negative regulation of biological process+++biological regulation+++reproductive process+++regulation of biological process
179001	ceh-49	mRNA	[Cellular Component]---GO:0005634///nucleus+++[Molecular Function]---GO:0003677///DNA binding+++GO:0001228///DNA-binding transcription activator activity, RNA polymerase II-specific+++[Biological Process]---GO:0030154///cell differentiation+++GO:0045944///positive regulation of transcription by RNA polymerase II	cellular_component+++molecular_function+++biological_process	[Cellular Component]---organelle+++cell part+++cell+++[Molecular Function]---binding+++transcription regulator activity+++[Biological Process]---positive regulation of biological process+++developmental process+++cellular process+++biological regulation+++metabolic process+++regulation of biological process
185409	gst-14	mRNA	[Molecular Function]---GO:0016740///transferase activity	molecular_function	[Molecular Function]---catalytic activity
174222	rnh-1.1	mRNA	[Cellular Component]---GO:0005634///nucleus+++[Molecular Function]---GO:0004523///RNA-DNA hybrid ribonuclease activity+++GO:0003676///nucleic acid binding+++[Biological Process]---GO:0090502///RNA phosphodiester bond hydrolysis, endonucleolytic+++GO:0043137///DNA replication, removal of RNA primer	cellular_component+++molecular_function+++biological_process	[Cellular Component]---organelle+++cell part+++cell+++[Molecular Function]---binding+++catalytic activity+++[Biological Process]---cellular process+++metabolic process
186488	nas-29	mRNA	[Cellular Component]---GO:0005576///extracellular region+++[Molecular Function]---GO:0046872///metal ion binding+++GO:0008270///zinc ion binding+++GO:0004222///metalloendopeptidase activity+++GO:0008237///metallopeptidase activity+++GO:0008233///peptidase activity+++GO:0016787///hydrolase activity+++[Biological Process]---GO:0006508///proteolysis+++GO:0018996///molting cycle, collagen and cuticul…	cellular_component+++molecular_function+++biological_process	[Cellular Component]---extracellular region+++[Molecular Function]---binding+++catalytic activity+++[Biological Process]---multicellular organismal process+++metabolic process
182932	C26B9.6	mRNA	[Molecular Function]---GO:0008270///zinc ion binding	molecular_function	[Molecular Function]---binding
178799	C17E7.9	mRNA	[Cellular Component]---GO:0016021///integral component of membrane+++GO:0016020///membrane	cellular_component	[Cellular Component]---membrane part+++membrane
3565301	igdb-1	mRNA	[Cellular Component]---GO:0016021///integral component of membrane+++GO:0005886///plasma membrane+++GO:0030017///sarcomere+++GO:0016020///membrane	cellular_component	[Cellular Component]---supramolecular complex+++organelle+++cell part+++membrane part+++cell+++membrane+++organelle part
182934	C26C6.6	mRNA	[Molecular Function]---GO:0046872///metal ion binding	molecular_function	[Molecular Function]---binding
172445	col-60	mRNA	[Cellular Component]---GO:0016021///integral component of membrane+++GO:0005581///collagen trimer+++GO:0016020///membrane+++[Molecular Function]---GO:0042302///structural constituent of cuticle	cellular_component+++molecular_function	[Cellular Component]---protein-containing complex+++membrane part+++membrane+++[Molecular Function]---structural molecule activity
188353	T10B5.8	mRNA	[Molecular Function]---GO:0010181///FMN binding+++GO:0016491///oxidoreductase activity+++GO:0003824///catalytic activity+++[Biological Process]---GO:0055114///oxidation-reduction process	molecular_function+++biological_process	[Molecular Function]---binding+++catalytic activity+++[Biological Process]---metabolic process
182232	ttbk-5	mRNA	[Cellular Component]---GO:0005634///nucleus+++GO:0005737///cytoplasm+++[Molecular Function]---GO:0004672///protein kinase activity+++GO:0005524///ATP binding+++GO:0016301///kinase activity+++[Biological Process]---GO:0018107///peptidyl-threonine phosphorylation+++GO:0016310///phosphorylation+++GO:0018105///peptidyl-serine phosphorylation+++GO:0006468///protein phosphorylation	cellular_component+++molecular_function+++biological_process	[Cellular Component]---organelle+++cell part+++cell+++[Molecular Function]---binding+++catalytic activity+++[Biological Process]---cellular process+++metabolic process
186113	hsp-17	mRNA	[Molecular Function]---GO:0046872///metal ion binding	molecular_function	[Molecular Function]---binding
178659	hsp-16.2	mRNA	[Cellular Component]---GO:0005737///cytoplasm+++[Molecular Function]---GO:0046872///metal ion binding+++GO:0051082///unfolded protein binding+++[Biological Process]---GO:0009408///response to heat	cellular_component+++molecular_function+++biological_process	[Cellular Component]---cell part+++cell+++[Molecular Function]---binding+++[Biological Process]---response to stimulus
182024	B0524.2	mRNA	[Cellular Component]---GO:0005811///lipid droplet+++GO:0005737///cytoplasm+++GO:0016020///membrane+++[Molecular Function]---GO:0050253///retinyl-palmitate esterase activity+++GO:0004806///triglyceride lipase activity+++GO:0016787///hydrolase activity+++[Biological Process]---GO:0055088///lipid homeostasis+++GO:0019433///triglyceride catabolic process+++GO:0006629///lipid metabolic process+++GO:00…	cellular_component+++molecular_function+++biological_process	[Cellular Component]---organelle+++cell part+++membrane+++cell+++[Molecular Function]---catalytic activity+++[Biological Process]---cellular process+++biological regulation+++metabolic process
184303	F10E9.1	mRNA	[Cellular Component]---GO:0016021///integral component of membrane	cellular_component	[Cellular Component]---membrane part+++membrane
179065	ZC487.1	mRNA	[Molecular Function]---GO:0046872///metal ion binding+++GO:0000166///nucleotide binding+++GO:0005524///ATP binding	molecular_function	[Molecular Function]---binding
172229	ptr-10	mRNA	[Cellular Component]---GO:0016021///integral component of membrane+++GO:0016020///membrane+++[Biological Process]---GO:0018996///molting cycle, collagen and cuticulin-based cuticle	cellular_component+++biological_process	[Cellular Component]---membrane part+++membrane+++[Biological Process]---multicellular organismal process
177301	Y59E9AR.1	mRNA	[Cellular Component]---GO:0005856///cytoskeleton	cellular_component	[Cellular Component]---organelle+++cell part+++cell
190110	scrm-7	mRNA	[Cellular Component]---GO:0016020///membrane+++[Molecular Function]---GO:0017128///phospholipid scramblase activity+++[Biological Process]---GO:0017121///phospholipid scrambling	cellular_component+++molecular_function+++biological_process	[Cellular Component]---membrane+++[Molecular Function]---transporter activity+++[Biological Process]---cellular process+++biological regulation+++cellular component organization or biogenesis
176412	C05B5.2	mRNA	[Cellular Component]---GO:0016021///integral component of membrane+++GO:0016020///membrane	cellular_component	[Cellular Component]---membrane part+++membrane
172885	clec-87	mRNA	[Cellular Component]---GO:0005575///cellular_component+++[Molecular Function]---GO:0030246///carbohydrate binding+++GO:0003674///molecular_function+++[Biological Process]---GO:0008150///biological_process	cellular_component+++molecular_function+++biological_process	[Cellular Component]---cellular_component+++[Molecular Function]---binding+++molecular_function+++[Biological Process]---biological_process
175336	F53A3.1	mRNA	[Cellular Component]---GO:0016021///integral component of membrane+++GO:0016020///membrane	cellular_component	[Cellular Component]---membrane part+++membrane
180096	oac-7	mRNA	[Cellular Component]---GO:0016021///integral component of membrane+++GO:0016020///membrane+++[Molecular Function]---GO:0016746///transferase activity, transferring acyl groups+++GO:0016747///transferase activity, transferring acyl groups other than amino-acyl groups+++GO:0016740///transferase activity	cellular_component+++molecular_function	[Cellular Component]---membrane part+++membrane+++[Molecular Function]---catalytic activity
13179502	peel-1	mRNA	[Cellular Component]---GO:0016021///integral component of membrane+++GO:0016020///membrane	cellular_component	[Cellular Component]---membrane part+++membrane
188761	lbp-8	mRNA	[Molecular Function]---GO:0008289///lipid binding+++[Biological Process]---GO:0006869///lipid transport	molecular_function+++biological_process	[Molecular Function]---binding+++[Biological Process]---localization
174158	nos-2	mRNA	[Cellular Component]---GO:0005737///cytoplasm+++[Molecular Function]---GO:0008270///zinc ion binding+++GO:0003723///RNA binding+++[Biological Process]---GO:0051726///regulation of cell cycle+++GO:0007281///germ cell development+++GO:0006417///regulation of translation+++GO:0048477///oogenesis	cellular_component+++molecular_function+++biological_process	[Cellular Component]---cell part+++cell+++[Molecular Function]---binding+++[Biological Process]---reproduction+++multi-organism process+++developmental process+++multicellular organismal process+++cellular process+++biological regulation+++metabolic process+++reproductive process+++regulation of biological process
172386	C17F3.1	mRNA	[Cellular Component]---GO:0016021///integral component of membrane+++GO:0016020///membrane	cellular_component	[Cellular Component]---membrane part+++membrane
171847	W03D8.5	mRNA	[Cellular Component]---GO:0005856///cytoskeleton	cellular_component	[Cellular Component]---organelle+++cell part+++cell
178340	C47A4.3	mRNA	[Cellular Component]---GO:0000164///protein phosphatase type 1 complex+++[Molecular Function]---GO:0016787///hydrolase activity+++GO:0004721///phosphoprotein phosphatase activity+++[Biological Process]---GO:0006470///protein dephosphorylation	cellular_component+++molecular_function+++biological_process	[Cellular Component]---protein-containing complex+++cell part+++cell+++[Molecular Function]---catalytic activity+++[Biological Process]---cellular process+++metabolic process
181800	abu-1	mRNA	[Cellular Component]---GO:0030176///integral component of endoplasmic reticulum membrane+++[Molecular Function]---GO:0003674///molecular_function+++[Biological Process]---GO:0030968///endoplasmic reticulum unfolded protein response	cellular_component+++molecular_function+++biological_process	[Cellular Component]---organelle+++cell part+++membrane part+++cell+++membrane+++organelle part+++[Molecular Function]---molecular_function+++[Biological Process]---cellular process+++signaling+++biological regulation+++regulation of biological process+++response to stimulus
181034	vit-1	mRNA	[Cellular Component]---GO:0005576///extracellular region+++[Molecular Function]---GO:0045735///nutrient reservoir activity+++GO:0005319///lipid transporter activity+++[Biological Process]---GO:0006869///lipid transport	cellular_component+++molecular_function+++biological_process	[Cellular Component]---extracellular region+++[Molecular Function]---transporter activity+++nutrient reservoir activity+++[Biological Process]---localization
3565371	C40H1.8	mRNA	[Molecular Function]---GO:0016787///hydrolase activity+++[Biological Process]---GO:0006629///lipid metabolic process	molecular_function+++biological_process	[Molecular Function]---catalytic activity+++[Biological Process]---metabolic process
179188	sth-1	mRNA	[Cellular Component]---GO:0005886///plasma membrane	cellular_component	[Cellular Component]---cell part+++cell+++membrane
177629	F17E9.5	mRNA	[Cellular Component]---GO:0016021///integral component of membrane+++GO:0016020///membrane+++[Molecular Function]---GO:0005515///protein binding	cellular_component+++molecular_function	[Cellular Component]---membrane part+++membrane+++[Molecular Function]---binding
185513	nep-15	mRNA	[Molecular Function]---GO:0004222///metalloendopeptidase activity+++GO:0008237///metallopeptidase activity+++[Biological Process]---GO:0006508///proteolysis	molecular_function+++biological_process	[Molecular Function]---catalytic activity+++[Biological Process]---metabolic process
178531	F11E6.7	mRNA	[Cellular Component]---GO:0005634///nucleus+++[Biological Process]---GO:0000723///telomere maintenance	cellular_component+++biological_process	[Cellular Component]---organelle+++cell part+++cell+++[Biological Process]---cellular process+++biological regulation+++metabolic process+++cellular component organization or biogenesis
180149	lsy-27	mRNA	[Molecular Function]---GO:0003676///nucleic acid binding	molecular_function	[Molecular Function]---binding
179813	C50B6.7	mRNA	[Molecular Function]---GO:0004556///alpha-amylase activity+++GO:0103025///alpha-amylase activity (releasing maltohexaose)+++GO:0016787///hydrolase activity+++GO:0043169///cation binding+++GO:0016798///hydrolase activity, acting on glycosyl bonds+++GO:0003824///catalytic activity+++[Biological Process]---GO:0008152///metabolic process+++GO:0005975///carbohydrate metabolic process	molecular_function+++biological_process	[Molecular Function]---binding+++catalytic activity+++[Biological Process]---metabolic process
191742	pes-8	mRNA	[Cellular Component]---GO:0016021///integral component of membrane+++GO:0016020///membrane	cellular_component	[Cellular Component]---membrane part+++membrane
179559	cln-3.1	mRNA	[Cellular Component]---GO:0005765///lysosomal membrane+++GO:0016021///integral component of membrane+++GO:0005764///lysosome+++GO:0005737///cytoplasm+++GO:0016020///membrane+++[Molecular Function]---GO:0003674///molecular_function+++[Biological Process]---GO:0051453///regulation of intracellular pH+++GO:0046662///regulation of oviposition+++GO:0008340///determination of adult lifespan+++GO:000704…	cellular_component+++molecular_function+++biological_process	[Cellular Component]---organelle+++cell part+++membrane part+++membrane+++cell+++organelle part+++[Molecular Function]---molecular_function+++[Biological Process]---reproduction+++developmental process+++multicellular organismal process+++cellular process+++biological regulation+++reproductive process+++regulation of biological process+++cellular component organization or biogenesis+++behavior+++…
3565598	F11A5.15	mRNA	[Cellular Component]---GO:0016021///integral component of membrane+++GO:0016020///membrane	cellular_component	[Cellular Component]---membrane part+++membrane
177815	cav-1	mRNA	[Cellular Component]---GO:0060473///cortical granule+++GO:0005901///caveola+++GO:0045121///membrane raft+++GO:0030133///transport vesicle+++GO:0016021///integral component of membrane+++GO:0000139///Golgi membrane+++GO:0005886///plasma membrane+++GO:0048471///perinuclear region of cytoplasm+++GO:0005794///Golgi apparatus+++GO:0005887///integral component of plasma membrane+++GO:0005938///cell cor…	cellular_component+++molecular_function+++biological_process	[Cellular Component]---organelle+++cell part+++membrane part+++cell+++membrane+++organelle part+++[Molecular Function]---binding+++structural molecule activity+++[Biological Process]---reproduction+++multicellular organismal process+++cellular process+++signaling+++biological regulation+++reproductive process+++regulation of biological process+++cellular component organization or biogenesis+++beh…
182740	folr-1	mRNA	[Cellular Component]---GO:0016021///integral component of membrane+++GO:0016020///membrane	cellular_component	[Cellular Component]---membrane part+++membrane
191605	acr-19	mRNA	[Cellular Component]---GO:0016021///integral component of membrane+++GO:0045211///postsynaptic membrane+++GO:0005886///plasma membrane+++GO:0045202///synapse+++GO:0005887///integral component of plasma membrane+++GO:0030054///cell junction+++GO:0043005///neuron projection+++GO:0016020///membrane+++[Molecular Function]---GO:0004888///transmembrane signaling receptor activity+++GO:0005230///extrace…	cellular_component+++molecular_function+++biological_process	[Cellular Component]---synapse part+++cell part+++membrane part+++synapse+++cell junction+++cell+++membrane+++[Molecular Function]---transporter activity+++molecular transducer activity+++[Biological Process]---multicellular organismal process+++cellular process+++signaling+++biological regulation+++regulation of biological process+++response to stimulus+++localization
178058	T01G1.2	mRNA	[Cellular Component]---GO:0016021///integral component of membrane+++GO:0016020///membrane	cellular_component	[Cellular Component]---membrane part+++membrane
176117	col-90	mRNA	[Cellular Component]---GO:0005581///collagen trimer+++[Molecular Function]---GO:0042302///structural constituent of cuticle	cellular_component+++molecular_function	[Cellular Component]---protein-containing complex+++[Molecular Function]---structural molecule activity
189366	Y6B3B.1	mRNA	[Cellular Component]---GO:0030687///preribosome, large subunit precursor+++[Biological Process]---GO:0006364///rRNA processing+++GO:0000027///ribosomal large subunit assembly	cellular_component+++biological_process	[Cellular Component]---protein-containing complex+++[Biological Process]---cellular process+++metabolic process+++cellular component organization or biogenesis
179755	ugt-6	mRNA	[Cellular Component]---GO:0043231///intracellular membrane-bounded organelle+++GO:0016020///membrane+++GO:0016021///integral component of membrane+++[Molecular Function]---GO:0016758///transferase activity, transferring hexosyl groups+++GO:0008194///UDP-glycosyltransferase activity+++GO:0015020///glucuronosyltransferase activity+++GO:0016757///transferase activity, transferring glycosyl groups+++…	cellular_component+++molecular_function+++biological_process	[Cellular Component]---organelle+++cell+++cell part+++membrane+++membrane part+++[Molecular Function]---catalytic activity+++[Biological Process]---metabolic process
190149	col-137	mRNA	[Cellular Component]---GO:0016021///integral component of membrane+++GO:0005581///collagen trimer+++GO:0016020///membrane+++[Molecular Function]---GO:0042302///structural constituent of cuticle	cellular_component+++molecular_function	[Cellular Component]---protein-containing complex+++membrane part+++membrane+++[Molecular Function]---structural molecule activity
188777	T23B12.5	mRNA	[Cellular Component]---GO:0016021///integral component of membrane+++GO:0000139///Golgi membrane+++GO:0016020///membrane+++GO:0005789///endoplasmic reticulum membrane+++[Biological Process]---GO:0006506///GPI anchor biosynthetic process	cellular_component+++biological_process	[Cellular Component]---organelle+++cell part+++membrane part+++cell+++membrane+++organelle part+++[Biological Process]---cellular process+++metabolic process
177972	swt-3	mRNA	[Cellular Component]---GO:0016021///integral component of membrane+++GO:0016020///membrane+++[Molecular Function]---GO:0051119///sugar transmembrane transporter activity+++[Biological Process]---GO:0034219///carbohydrate transmembrane transport+++GO:0008643///carbohydrate transport	cellular_component+++molecular_function+++biological_process	[Cellular Component]---membrane part+++membrane+++[Molecular Function]---transporter activity+++[Biological Process]---localization
191342	dyf-2	mRNA	[Cellular Component]---GO:0097730///non-motile cilium+++GO:0005929///cilium+++GO:0042995///cell projection+++GO:0030992///intraciliary transport particle B+++GO:0030991///intraciliary transport particle A+++[Biological Process]---GO:0015031///protein transport+++GO:0006935///chemotaxis+++GO:0060271///cilium assembly+++GO:0008104///protein localization+++GO:0035721///intraciliary retrograde transp…	cellular_component+++biological_process	[Cellular Component]---protein-containing complex+++organelle+++cell part+++cell+++[Biological Process]---cellular process+++cellular component organization or biogenesis+++behavior+++response to stimulus+++localization+++locomotion
3564871	C51E3.10	mRNA	[Cellular Component]---GO:0016021///integral component of membrane+++GO:0016020///membrane	cellular_component	[Cellular Component]---membrane part+++membrane
3565413	col-135	mRNA	[Cellular Component]---GO:0005615///extracellular space+++GO:0005581///collagen trimer+++GO:0031012///extracellular matrix+++[Molecular Function]---GO:0005201///extracellular matrix structural constituent+++[Biological Process]---GO:0030198///extracellular matrix organization	cellular_component+++molecular_function+++biological_process	[Cellular Component]---extracellular region part+++protein-containing complex+++extracellular region+++[Molecular Function]---structural molecule activity+++[Biological Process]---cellular process+++cellular component organization or biogenesis
190493	tbx-33	mRNA	[Cellular Component]---GO:0005634///nucleus+++[Molecular Function]---GO:0003700///DNA-binding transcription factor activity+++GO:0003677///DNA binding+++[Biological Process]---GO:0006355///regulation of transcription, DNA-templated	cellular_component+++molecular_function+++biological_process	[Cellular Component]---organelle+++cell part+++cell+++[Molecular Function]---transcription regulator activity+++binding+++[Biological Process]---cellular process+++biological regulation+++metabolic process+++regulation of biological process
172007	egg-5	mRNA	[Cellular Component]---GO:0005938///cell cortex+++GO:0005634///nucleus+++GO:0005737///cytoplasm+++[Molecular Function]---GO:0019901///protein kinase binding+++GO:0004725///protein tyrosine phosphatase activity+++GO:0016791///phosphatase activity+++[Biological Process]---GO:0016311///dephosphorylation+++GO:0030703///eggshell formation+++GO:0040038///polar body extrusion after meiotic divisions+++G…	cellular_component+++molecular_function+++biological_process	[Cellular Component]---organelle+++cell part+++cell+++[Molecular Function]---binding+++catalytic activity+++[Biological Process]---reproduction+++multi-organism process+++positive regulation of biological process+++developmental process+++multicellular organismal process+++cellular process+++negative regulation of biological process+++biological regulation+++metabolic process+++reproductive proce…
184205	ugt-65	mRNA	[Cellular Component]---GO:0016021///integral component of membrane+++GO:0043231///intracellular membrane-bounded organelle+++GO:0016020///membrane+++[Molecular Function]---GO:0008194///UDP-glycosyltransferase activity+++GO:0016757///transferase activity, transferring glycosyl groups+++GO:0015020///glucuronosyltransferase activity+++GO:0016740///transferase activity+++GO:0016758///transferase acti…	cellular_component+++molecular_function+++biological_process	[Cellular Component]---organelle+++cell part+++membrane part+++cell+++membrane+++[Molecular Function]---catalytic activity+++[Biological Process]---metabolic process
184311	clec-153	mRNA	[Molecular Function]---GO:0030246///carbohydrate binding	molecular_function	[Molecular Function]---binding
177739	F23B2.7	mRNA	[Cellular Component]---GO:0016021///integral component of membrane+++GO:0016020///membrane	cellular_component	[Cellular Component]---membrane part+++membrane
185299	gst-38	mRNA	[Molecular Function]---GO:0016740///transferase activity+++[Biological Process]---GO:0045087///innate immune response	molecular_function+++biological_process	[Molecular Function]---catalytic activity+++[Biological Process]---immune system process+++response to stimulus
173730	nep-3	mRNA	[Cellular Component]---GO:0016021///integral component of membrane+++GO:0016020///membrane+++[Molecular Function]---GO:0004222///metalloendopeptidase activity+++GO:0008237///metallopeptidase activity+++[Biological Process]---GO:0006508///proteolysis	cellular_component+++molecular_function+++biological_process	[Cellular Component]---membrane part+++membrane+++[Molecular Function]---catalytic activity+++[Biological Process]---metabolic process
187045	nas-3	mRNA	[Cellular Component]---GO:0005576///extracellular region+++[Molecular Function]---GO:0046872///metal ion binding+++GO:0008270///zinc ion binding+++GO:0004222///metalloendopeptidase activity+++GO:0008237///metallopeptidase activity+++GO:0008233///peptidase activity+++GO:0016787///hydrolase activity+++[Biological Process]---GO:0006508///proteolysis	cellular_component+++molecular_function+++biological_process	[Cellular Component]---extracellular region+++[Molecular Function]---binding+++catalytic activity+++[Biological Process]---metabolic process
259409	fipr-22	mRNA	[Biological Process]---GO:0045087///innate immune response	biological_process	[Biological Process]---immune system process+++response to stimulus
187598	R05A10.8	mRNA	[Cellular Component]---GO:0016021///integral component of membrane+++GO:0016020///membrane	cellular_component	[Cellular Component]---membrane part+++membrane
188361	cyp-13A1	mRNA	[Molecular Function]---GO:0046872///metal ion binding+++GO:0020037///heme binding+++GO:0005506///iron ion binding+++GO:0016491///oxidoreductase activity+++GO:0004497///monooxygenase activity+++GO:0016705///oxidoreductase activity, acting on paired donors, with incorporation or reduction of molecular oxygen+++[Biological Process]---GO:0055114///oxidation-reduction process	molecular_function+++biological_process	[Molecular Function]---binding+++catalytic activity+++[Biological Process]---metabolic process
174614	myrf-1	mRNA	[Cellular Component]---GO:0016021///integral component of membrane+++GO:0005783///endoplasmic reticulum+++GO:0045178///basal part of cell+++GO:0005634///nucleus+++GO:0005737///cytoplasm+++GO:0016020///membrane+++GO:0005789///endoplasmic reticulum membrane+++[Molecular Function]---GO:0003700///DNA-binding transcription factor activity+++GO:0008233///peptidase activity+++GO:0003677///DNA binding+++…	cellular_component+++molecular_function+++biological_process	[Cellular Component]---organelle+++cell part+++membrane part+++membrane+++cell+++organelle part+++[Molecular Function]---transcription regulator activity+++binding+++catalytic activity+++[Biological Process]---positive regulation of biological process+++developmental process+++cellular process+++multicellular organismal process+++biological regulation+++metabolic process+++regulation of biologica…
185212	col-152	mRNA	[Cellular Component]---GO:0016021///integral component of membrane+++GO:0005581///collagen trimer+++GO:0016020///membrane+++[Molecular Function]---GO:0042302///structural constituent of cuticle	cellular_component+++molecular_function	[Cellular Component]---protein-containing complex+++membrane part+++membrane+++[Molecular Function]---structural molecule activity
183291	C37C3.11	mRNA	[Cellular Component]---GO:0016021///integral component of membrane+++GO:0016020///membrane	cellular_component	[Cellular Component]---membrane part+++membrane
185498	F39F10.3	mRNA	[Cellular Component]---GO:0005737///cytoplasm+++GO:0005634///nucleus+++[Molecular Function]---GO:0004674///protein serine/threonine kinase activity+++GO:0000166///nucleotide binding+++GO:0004672///protein kinase activity+++GO:0005524///ATP binding+++[Biological Process]---GO:0018107///peptidyl-threonine phosphorylation+++GO:0018105///peptidyl-serine phosphorylation+++GO:0006468///protein phosphor…	cellular_component+++molecular_function+++biological_process	[Cellular Component]---organelle+++cell part+++cell+++[Molecular Function]---binding+++catalytic activity+++[Biological Process]---cellular process+++metabolic process
189563	comt-2	mRNA	[Molecular Function]---GO:0008171///O-methyltransferase activity+++GO:0008757///S-adenosylmethionine-dependent methyltransferase activity+++GO:0008168///methyltransferase activity+++GO:0016740///transferase activity+++[Biological Process]---GO:0032259///methylation+++GO:0045087///innate immune response	molecular_function+++biological_process	[Molecular Function]---catalytic activity+++[Biological Process]---metabolic process+++immune system process+++response to stimulus
173849	msp-31	mRNA	[Cellular Component]---GO:0031143///pseudopodium+++GO:0005856///cytoskeleton+++GO:0005737///cytoplasm	cellular_component	[Cellular Component]---organelle+++cell part+++cell
184622	lys-10	mRNA	[Molecular Function]---GO:0003796///lysozyme activity+++[Biological Process]---GO:0009253///peptidoglycan catabolic process+++GO:0016998///cell wall macromolecule catabolic process+++GO:0050830///defense response to Gram-positive bacterium+++GO:0045087///innate immune response	molecular_function+++biological_process	[Molecular Function]---catalytic activity+++[Biological Process]---multi-organism process+++cellular process+++metabolic process+++immune system process+++response to stimulus
173856	try-1	mRNA	[Molecular Function]---GO:0008233///peptidase activity+++GO:0004252///serine-type endopeptidase activity+++GO:0016787///hydrolase activity+++GO:0008236///serine-type peptidase activity+++[Biological Process]---GO:0006508///proteolysis	molecular_function+++biological_process	[Molecular Function]---catalytic activity+++[Biological Process]---metabolic process
178840	skr-7	mRNA	[Molecular Function]---GO:0016874///ligase activity+++[Biological Process]---GO:0006511///ubiquitin-dependent protein catabolic process+++GO:1902230///negative regulation of intrinsic apoptotic signaling pathway in response to DNA damage	molecular_function+++biological_process	[Molecular Function]---catalytic activity+++[Biological Process]---cellular process+++signaling+++negative regulation of biological process+++biological regulation+++metabolic process+++regulation of biological process+++response to stimulus
187305	K11G9.3	mRNA	[Cellular Component]---GO:0005737///cytoplasm+++GO:0005886///plasma membrane+++[Molecular Function]---GO:0016787///hydrolase activity	cellular_component+++molecular_function	[Cellular Component]---cell part+++membrane+++cell+++[Molecular Function]---catalytic activity
179810	nasp-2	mRNA	[Cellular Component]---GO:0005634///nucleus+++GO:0005654///nucleoplasm+++[Molecular Function]---GO:0042393///histone binding+++[Biological Process]---GO:0034080///CENP-A containing nucleosome assembly+++GO:0006335///DNA replication-dependent nucleosome assembly	cellular_component+++molecular_function+++biological_process	[Cellular Component]---organelle+++cell part+++membrane-enclosed lumen+++cell+++organelle part+++[Molecular Function]---binding+++[Biological Process]---cellular process+++cellular component organization or biogenesis
188809	nas-27	mRNA	[Cellular Component]---GO:0005576///extracellular region+++[Molecular Function]---GO:0046872///metal ion binding+++GO:0008270///zinc ion binding+++GO:0004222///metalloendopeptidase activity+++GO:0008237///metallopeptidase activity+++GO:0008233///peptidase activity+++GO:0016787///hydrolase activity+++[Biological Process]---GO:0006508///proteolysis+++GO:0018996///molting cycle, collagen and cuticul…	cellular_component+++molecular_function+++biological_process	[Cellular Component]---extracellular region+++[Molecular Function]---binding+++catalytic activity+++[Biological Process]---multicellular organismal process+++metabolic process
266877	spsb-2	mRNA	[Cellular Component]---GO:0019005///SCF ubiquitin ligase complex+++[Molecular Function]---GO:0004842///ubiquitin-protein transferase activity+++[Biological Process]---GO:0006511///ubiquitin-dependent protein catabolic process+++GO:0043161///proteasome-mediated ubiquitin-dependent protein catabolic process+++GO:0016567///protein ubiquitination	cellular_component+++molecular_function+++biological_process	[Cellular Component]---protein-containing complex+++cell part+++cell+++[Molecular Function]---catalytic activity+++[Biological Process]---cellular process+++metabolic process
186157	F53C3.1	mRNA	[Cellular Component]---GO:0005737///cytoplasm+++GO:0005634///nucleus+++[Molecular Function]---GO:0004672///protein kinase activity+++GO:0005524///ATP binding+++[Biological Process]---GO:0018107///peptidyl-threonine phosphorylation+++GO:0018105///peptidyl-serine phosphorylation+++GO:0006468///protein phosphorylation	cellular_component+++molecular_function+++biological_process	[Cellular Component]---organelle+++cell part+++cell+++[Molecular Function]---binding+++catalytic activity+++[Biological Process]---cellular process+++metabolic process
188608	T19D12.5	mRNA	[Cellular Component]---GO:0005634///nucleus+++GO:0005737///cytoplasm+++[Molecular Function]---GO:0004674///protein serine/threonine kinase activity+++GO:0000166///nucleotide binding+++GO:0004672///protein kinase activity+++GO:0005524///ATP binding+++[Biological Process]---GO:0018107///peptidyl-threonine phosphorylation+++GO:0018105///peptidyl-serine phosphorylation+++GO:0006468///protein phosphor…	cellular_component+++molecular_function+++biological_process	[Cellular Component]---organelle+++cell part+++cell+++[Molecular Function]---binding+++catalytic activity+++[Biological Process]---cellular process+++metabolic process
174613	clec-61	mRNA	[Molecular Function]---GO:0030246///carbohydrate binding+++[Biological Process]---GO:0050830///defense response to Gram-positive bacterium	molecular_function+++biological_process	[Molecular Function]---binding+++[Biological Process]---multi-organism process+++response to stimulus
174706	bigr-1	mRNA	[Molecular Function]---GO:0016787///hydrolase activity+++[Biological Process]---GO:0008152///metabolic process	molecular_function+++biological_process	[Molecular Function]---catalytic activity+++[Biological Process]---metabolic process
192081	unc-42	mRNA	[Cellular Component]---GO:0005634///nucleus+++[Molecular Function]---GO:0003677///DNA binding+++GO:0043565///sequence-specific DNA binding+++[Biological Process]---GO:0006355///regulation of transcription, DNA-templated+++GO:0048665///neuron fate specification+++GO:0045944///positive regulation of transcription by RNA polymerase II	cellular_component+++molecular_function+++biological_process	[Cellular Component]---organelle+++cell part+++cell+++[Molecular Function]---binding+++[Biological Process]---developmental process+++positive regulation of biological process+++multicellular organismal process+++cellular process+++biological regulation+++metabolic process+++regulation of biological process
188043	T04A11.2	mRNA	[Molecular Function]---GO:0003824///catalytic activity+++[Biological Process]---GO:0009058///biosynthetic process	molecular_function+++biological_process	[Molecular Function]---catalytic activity+++[Biological Process]---metabolic process
187458	M7.12	mRNA	[Cellular Component]---GO:0005737///cytoplasm+++[Molecular Function]---GO:0008080///N-acetyltransferase activity+++[Biological Process]---GO:0006807///nitrogen compound metabolic process	cellular_component+++molecular_function+++biological_process	[Cellular Component]---cell part+++cell+++[Molecular Function]---catalytic activity+++[Biological Process]---metabolic process
171960	gsp-4	mRNA	[Cellular Component]---GO:0000790///nuclear chromatin+++GO:0000785///chromatin+++GO:0042995///cell projection+++GO:0031143///pseudopodium+++GO:0005694///chromosome+++GO:0005737///cytoplasm+++[Molecular Function]---GO:0046872///metal ion binding+++GO:0016787///hydrolase activity+++GO:0004721///phosphoprotein phosphatase activity+++[Biological Process]---GO:0030154///cell differentiation+++GO:00070…	cellular_component+++molecular_function+++biological_process	[Cellular Component]---organelle+++cell part+++membrane-enclosed lumen+++cell+++organelle part+++[Molecular Function]---binding+++catalytic activity+++[Biological Process]---reproduction+++multi-organism process+++developmental process+++multicellular organismal process+++cellular process+++biological regulation+++metabolic process+++reproductive process+++regulation of biological process+++cellu…
180205	hmit-1.1	mRNA	[Cellular Component]---GO:0016021///integral component of membrane+++GO:0016324///apical plasma membrane+++GO:0005887///integral component of plasma membrane+++GO:0016020///membrane+++[Molecular Function]---GO:0005366///myo-inositol:proton symporter activity+++GO:0022857///transmembrane transporter activity+++GO:0005215///transporter activity+++[Biological Process]---GO:0055085///transmembrane tr…	cellular_component+++molecular_function+++biological_process	[Cellular Component]---cell part+++membrane part+++cell+++membrane+++[Molecular Function]---transporter activity+++[Biological Process]---localization
173747	R11F4.1	mRNA	[Cellular Component]---GO:0005739///mitochondrion+++GO:0005737///cytoplasm+++[Molecular Function]---GO:0016773///phosphotransferase activity, alcohol group as acceptor+++GO:0000166///nucleotide binding+++GO:0016740///transferase activity+++GO:0005524///ATP binding+++GO:0004370///glycerol kinase activity+++GO:0016301///kinase activity+++[Biological Process]---GO:0046167///glycerol-3-phosphate bios…	cellular_component+++molecular_function+++biological_process	[Cellular Component]---organelle+++cell part+++cell+++[Molecular Function]---binding+++catalytic activity+++[Biological Process]---cellular process+++metabolic process
187441	M04C9.4	mRNA	[Cellular Component]---GO:0005634///nucleus	cellular_component	[Cellular Component]---organelle+++cell part+++cell
174826	vab-23	mRNA	[Cellular Component]---GO:0016607///nuclear speck+++[Biological Process]---GO:0048730///epidermis morphogenesis+++GO:0040025///vulval development+++GO:0010172///embryonic body morphogenesis+++GO:0098609///cell-cell adhesion	cellular_component+++biological_process	[Cellular Component]---organelle+++cell part+++membrane-enclosed lumen+++cell+++organelle part+++[Biological Process]---developmental process+++multicellular organismal process+++biological adhesion
178965	F44E7.2	mRNA	[Cellular Component]---GO:0005737///cytoplasm+++[Molecular Function]---GO:0016791///phosphatase activity+++[Biological Process]---GO:0016311///dephosphorylation	cellular_component+++molecular_function+++biological_process	[Cellular Component]---cell part+++cell+++[Molecular Function]---catalytic activity+++[Biological Process]---cellular process+++metabolic process
181807	sfxn-1.1	mRNA	[Cellular Component]---GO:0016021///integral component of membrane+++GO:0005739///mitochondrion+++GO:0031966///mitochondrial membrane+++GO:0016020///membrane+++[Molecular Function]---GO:0015075///ion transmembrane transporter activity+++[Biological Process]---GO:0055085///transmembrane transport+++GO:0034220///ion transmembrane transport+++GO:0006811///ion transport	cellular_component+++molecular_function+++biological_process	[Cellular Component]---organelle+++cell part+++membrane part+++membrane+++cell+++organelle part+++[Molecular Function]---transporter activity+++[Biological Process]---localization
24104914	T21D12.7	mRNA	[Molecular Function]---GO:0004867///serine-type endopeptidase inhibitor activity+++[Biological Process]---GO:0010951///negative regulation of endopeptidase activity	molecular_function+++biological_process	[Molecular Function]---molecular function regulator+++[Biological Process]---cellular process+++negative regulation of biological process+++biological regulation+++metabolic process+++regulation of biological process
172305	pigv-1	mRNA	[Cellular Component]---GO:0016021///integral component of membrane+++GO:0005783///endoplasmic reticulum+++GO:0031501///mannosyltransferase complex+++GO:0016020///membrane+++GO:0005789///endoplasmic reticulum membrane+++[Molecular Function]---GO:0004584///dolichyl-phosphate-mannose-glycolipid alpha-mannosyltransferase activity+++GO:0016757///transferase activity, transferring glycosyl groups+++GO:…	cellular_component+++molecular_function+++biological_process	[Cellular Component]---protein-containing complex+++organelle+++cell part+++membrane part+++membrane+++cell+++organelle part+++[Molecular Function]---catalytic activity+++[Biological Process]---cellular process+++metabolic process
172329	ima-2	mRNA	[Cellular Component]---GO:0005635///nuclear envelope+++GO:0005643///nuclear pore+++GO:0005634///nucleus+++GO:0005737///cytoplasm+++[Molecular Function]---GO:0061608///nuclear import signal receptor activity+++GO:0008565///protein transporter activity+++GO:0005515///protein binding+++[Biological Process]---GO:0015031///protein transport+++GO:0051983///regulation of chromosome segregation+++GO:0009…	cellular_component+++molecular_function+++biological_process	[Cellular Component]---protein-containing complex+++organelle+++cell part+++cell+++organelle part+++[Molecular Function]---molecular carrier activity+++transporter activity+++binding+++[Biological Process]---developmental process+++multicellular organismal process+++cellular process+++biological regulation+++regulation of biological process+++cellular component organization or biogenesis+++locali…
180119	gyg-2	mRNA	[Cellular Component]---GO:0055120///striated muscle dense body+++GO:0005737///cytoplasm+++[Molecular Function]---GO:0016757///transferase activity, transferring glycosyl groups+++GO:0016740///transferase activity+++[Biological Process]---GO:0005978///glycogen biosynthetic process	cellular_component+++molecular_function+++biological_process	[Cellular Component]---supramolecular complex+++organelle+++cell part+++cell+++organelle part+++[Molecular Function]---catalytic activity+++[Biological Process]---cellular process+++metabolic process
174008	ZK84.1	mRNA	[Cellular Component]---GO:0005576///extracellular region+++[Molecular Function]---GO:0008083///growth factor activity	cellular_component+++molecular_function	[Cellular Component]---extracellular region+++[Molecular Function]---binding+++molecular function regulator
190409	rgs-8.2	mRNA	[Cellular Component]---GO:0005737///cytoplasm+++GO:0005886///plasma membrane+++[Molecular Function]---GO:0005096///GTPase activator activity+++[Biological Process]---GO:0009968///negative regulation of signal transduction	cellular_component+++molecular_function+++biological_process	[Cellular Component]---cell part+++membrane+++cell+++[Molecular Function]---molecular function regulator+++[Biological Process]---cellular process+++signaling+++negative regulation of biological process+++biological regulation+++regulation of biological process+++response to stimulus
175607	mab-21	mRNA	[Biological Process]---GO:0030154///cell differentiation+++GO:0045165///cell fate commitment+++GO:0007275///multicellular organism development+++GO:0009792///embryo development ending in birth or egg hatching	biological_process	[Biological Process]---developmental process+++cellular process+++multicellular organismal process
185170	nhr-180	mRNA	[Cellular Component]---GO:0005634///nucleus+++[Molecular Function]---GO:0046872///metal ion binding+++GO:0008270///zinc ion binding+++GO:0003700///DNA-binding transcription factor activity+++GO:0003677///DNA binding+++GO:0043565///sequence-specific DNA binding+++[Biological Process]---GO:0006355///regulation of transcription, DNA-templated	cellular_component+++molecular_function+++biological_process	[Cellular Component]---organelle+++cell part+++cell+++[Molecular Function]---transcription regulator activity+++binding+++[Biological Process]---cellular process+++biological regulation+++metabolic process+++regulation of biological process
172383	ZC581.3	mRNA	[Cellular Component]---GO:0016021///integral component of membrane+++GO:0016020///membrane	cellular_component	[Cellular Component]---membrane part+++membrane
179123	C03G6.5	mRNA	[Cellular Component]---GO:0005576///extracellular region	cellular_component	[Cellular Component]---extracellular region
187530	R02F2.8	mRNA	[Cellular Component]---GO:0016021///integral component of membrane+++GO:0016020///membrane+++[Molecular Function]---GO:0015171///amino acid transmembrane transporter activity+++[Biological Process]---GO:0003333///amino acid transmembrane transport	cellular_component+++molecular_function+++biological_process	[Cellular Component]---membrane part+++membrane+++[Molecular Function]---transporter activity+++[Biological Process]---localization
172685	C36B1.11	mRNA	[Molecular Function]---GO:0005515///protein binding	molecular_function	[Molecular Function]---binding
191455	tba-8	mRNA	[Cellular Component]---GO:0005856///cytoskeleton+++GO:0005874///microtubule+++GO:0005737///cytoplasm+++[Molecular Function]---GO:0005200///structural constituent of cytoskeleton+++GO:0000166///nucleotide binding+++GO:0003924///GTPase activity+++GO:0005525///GTP binding+++[Biological Process]---GO:0000278///mitotic cell cycle+++GO:0000226///microtubule cytoskeleton organization+++GO:0007017///micr…	cellular_component+++molecular_function+++biological_process	[Cellular Component]---supramolecular complex+++organelle+++cell part+++cell+++organelle part+++[Molecular Function]---binding+++catalytic activity+++structural molecule activity+++[Biological Process]---cellular process+++cellular component organization or biogenesis
181847	cyp-34A5	mRNA	[Molecular Function]---GO:0016705///oxidoreductase activity, acting on paired donors, with incorporation or reduction of molecular oxygen+++GO:0008395///steroid hydroxylase activity+++GO:0020037///heme binding+++GO:0005506///iron ion binding	molecular_function	[Molecular Function]---binding+++catalytic activity
179926	ent-3	mRNA	[Cellular Component]---GO:0016021///integral component of membrane+++GO:0005886///plasma membrane+++GO:0016020///membrane+++[Molecular Function]---GO:0005337///nucleoside transmembrane transporter activity+++[Biological Process]---GO:1901642///nucleoside transmembrane transport	cellular_component+++molecular_function+++biological_process	[Cellular Component]---cell part+++membrane part+++cell+++membrane+++[Molecular Function]---transporter activity+++[Biological Process]---localization
3564843	C30G7.4	mRNA	[Cellular Component]---GO:0016021///integral component of membrane+++GO:0016020///membrane	cellular_component	[Cellular Component]---membrane part+++membrane
175029	his-11	mRNA	[Cellular Component]---GO:0000785///chromatin+++GO:0000786///nucleosome+++GO:0005694///chromosome+++GO:0005634///nucleus+++[Molecular Function]---GO:0003677///DNA binding+++GO:0044877///protein-containing complex binding+++GO:0046982///protein heterodimerization activity+++[Biological Process]---GO:0006334///nucleosome assembly	cellular_component+++molecular_function+++biological_process	[Cellular Component]---protein-containing complex+++organelle+++cell part+++cell+++organelle part+++[Molecular Function]---binding+++[Biological Process]---cellular process+++cellular component organization or biogenesis
183476	cdh-10	mRNA	[Cellular Component]---GO:0016021///integral component of membrane+++GO:0005886///plasma membrane+++GO:0005887///integral component of plasma membrane+++GO:0016020///membrane+++[Molecular Function]---GO:0005509///calcium ion binding+++[Biological Process]---GO:0007155///cell adhesion+++GO:0007156///homophilic cell adhesion via plasma membrane adhesion molecules	cellular_component+++molecular_function+++biological_process	[Cellular Component]---cell part+++membrane part+++cell+++membrane+++[Molecular Function]---binding+++[Biological Process]---biological adhesion
183934	D1086.7	mRNA	[Cellular Component]---GO:0016021///integral component of membrane+++GO:0016020///membrane	cellular_component	[Cellular Component]---membrane part+++membrane
177866	msd-3	mRNA	[Cellular Component]---GO:0044297///cell body+++GO:0031143///pseudopodium	cellular_component	[Cellular Component]---cell part+++cell
178811	phat-5	mRNA	[Biological Process]---GO:1905905///pharyngeal gland morphogenesis	biological_process	[Biological Process]---developmental process+++multicellular organismal process
189075	cutl-6	mRNA	[Cellular Component]---GO:0016021///integral component of membrane+++GO:0016020///membrane	cellular_component	[Cellular Component]---membrane part+++membrane
181838	B0207.9	mRNA	[Cellular Component]---GO:0016021///integral component of membrane+++GO:0016020///membrane	cellular_component	[Cellular Component]---membrane part+++membrane
184285	F10B5.3	mRNA	[Molecular Function]---GO:0003676///nucleic acid binding	molecular_function	[Molecular Function]---binding
3896857	Y39H10B.2	mRNA	[Cellular Component]---GO:0016021///integral component of membrane+++GO:0016020///membrane	cellular_component	[Cellular Component]---membrane part+++membrane
188643	T20D4.7	mRNA	[Cellular Component]---GO:0005623///cell+++[Molecular Function]---GO:0004791///thioredoxin-disulfide reductase activity+++[Biological Process]---GO:0045454///cell redox homeostasis	cellular_component+++molecular_function+++biological_process	[Cellular Component]---cell+++[Molecular Function]---antioxidant activity+++catalytic activity+++[Biological Process]---cellular process+++biological regulation+++regulation of biological process
174312	tub-1	mRNA	[Cellular Component]---GO:0005575///cellular_component+++GO:0030424///axon+++GO:0005929///cilium+++GO:0030425///dendrite+++GO:0042995///cell projection+++GO:0005737///cytoplasm+++[Molecular Function]---GO:0003674///molecular_function+++GO:0035091///phosphatidylinositol binding+++[Biological Process]---GO:0006935///chemotaxis+++GO:0006629///lipid metabolic process+++GO:0097500///receptor localizat…	cellular_component+++molecular_function+++biological_process	[Cellular Component]---organelle+++cell part+++cell+++cellular_component+++[Molecular Function]---binding+++molecular_function+++[Biological Process]---metabolic process+++response to stimulus+++localization+++locomotion
173033	nhr-113	mRNA	[Cellular Component]---GO:0005634///nucleus+++[Molecular Function]---GO:0046872///metal ion binding+++GO:0008270///zinc ion binding+++GO:0003700///DNA-binding transcription factor activity+++GO:0003677///DNA binding+++GO:0043565///sequence-specific DNA binding+++[Biological Process]---GO:0006355///regulation of transcription, DNA-templated	cellular_component+++molecular_function+++biological_process	[Cellular Component]---organelle+++cell part+++cell+++[Molecular Function]---transcription regulator activity+++binding+++[Biological Process]---cellular process+++biological regulation+++metabolic process+++regulation of biological process
176105	tyr-1	mRNA	[Molecular Function]---GO:0046872///metal ion binding+++GO:0016491///oxidoreductase activity+++GO:0004497///monooxygenase activity+++GO:0005515///protein binding+++[Biological Process]---GO:0055114///oxidation-reduction process	molecular_function+++biological_process	[Molecular Function]---binding+++catalytic activity+++[Biological Process]---metabolic process
178333	C08F11.12	mRNA	[Cellular Component]---GO:0005576///extracellular region	cellular_component	[Cellular Component]---extracellular region
173695	col-71	mRNA	[Cellular Component]---GO:0005615///extracellular space+++GO:0016021///integral component of membrane+++GO:0005581///collagen trimer+++GO:0031012///extracellular matrix+++GO:0016020///membrane+++[Molecular Function]---GO:0005201///extracellular matrix structural constituent+++GO:0042302///structural constituent of cuticle+++[Biological Process]---GO:0030198///extracellular matrix organization	cellular_component+++molecular_function+++biological_process	[Cellular Component]---extracellular region part+++protein-containing complex+++membrane part+++extracellular region+++membrane+++[Molecular Function]---structural molecule activity+++[Biological Process]---cellular process+++cellular component organization or biogenesis
3565719	W10C8.6	mRNA	[Cellular Component]---GO:0016021///integral component of membrane+++GO:0016020///membrane	cellular_component	[Cellular Component]---membrane part+++membrane
191515	nit-1	mRNA	[Molecular Function]---GO:0016810///hydrolase activity, acting on carbon-nitrogen (but not peptide) bonds+++GO:0000257///nitrilase activity+++GO:0080109///indole-3-acetonitrile nitrile hydratase activity+++[Biological Process]---GO:0019499///cyanide metabolic process+++GO:0019500///cyanide catabolic process+++GO:0006807///nitrogen compound metabolic process	molecular_function+++biological_process	[Molecular Function]---catalytic activity+++[Biological Process]---cellular process+++metabolic process
177719	unc-129	mRNA	[Cellular Component]---GO:0005615///extracellular space+++GO:0005576///extracellular region+++[Molecular Function]---GO:0005160///transforming growth factor beta receptor binding+++GO:0005102///signaling receptor binding+++GO:0005125///cytokine activity+++GO:0008083///growth factor activity+++[Biological Process]---GO:0043408///regulation of MAPK cascade+++GO:0040039///inductive cell migration+++…	cellular_component+++molecular_function+++biological_process	[Cellular Component]---extracellular region part+++extracellular region+++[Molecular Function]---binding+++molecular function regulator+++[Biological Process]---reproductive process+++reproduction+++regulation of biological process+++cellular component organization or biogenesis+++positive regulation of biological process+++developmental process+++cellular process+++multicellular organismal proce…
173720	T24E12.5	mRNA	[Cellular Component]---GO:0016021///integral component of membrane+++GO:0016020///membrane	cellular_component	[Cellular Component]---membrane part+++membrane
179803	col-159	mRNA	[Cellular Component]---GO:0016021///integral component of membrane+++GO:0005581///collagen trimer+++GO:0016020///membrane+++[Molecular Function]---GO:0042302///structural constituent of cuticle	cellular_component+++molecular_function	[Cellular Component]---protein-containing complex+++membrane part+++membrane+++[Molecular Function]---structural molecule activity
178054	F54E12.2	mRNA	[Molecular Function]---GO:0005524///ATP binding	molecular_function	[Molecular Function]---binding
173506	Y57G7A.6	mRNA	[Cellular Component]---GO:0016021///integral component of membrane+++GO:0016020///membrane	cellular_component	[Cellular Component]---membrane part+++membrane
181059	C34D10.2	mRNA	[Cellular Component]---GO:0005737///cytoplasm+++[Molecular Function]---GO:0046872///metal ion binding+++[Biological Process]---GO:0002164///larval development+++GO:0030182///neuron differentiation+++GO:0050767///regulation of neurogenesis	cellular_component+++molecular_function+++biological_process	[Cellular Component]---cell part+++cell+++[Molecular Function]---binding+++[Biological Process]---developmental process+++cellular process+++multicellular organismal process+++biological regulation+++regulation of biological process
177447	C17H12.8	mRNA	[Cellular Component]---GO:0045121///membrane raft+++[Biological Process]---GO:0045087///innate immune response	cellular_component+++biological_process	[Cellular Component]---membrane part+++membrane+++[Biological Process]---immune system process+++response to stimulus
174941	cyd-1	mRNA	[Cellular Component]---GO:0000307///cyclin-dependent protein kinase holoenzyme complex+++GO:0005634///nucleus+++GO:0005737///cytoplasm+++[Molecular Function]---GO:0019901///protein kinase binding+++GO:0004672///protein kinase activity+++GO:0016538///cyclin-dependent protein serine/threonine kinase regulator activity+++GO:0005515///protein binding+++[Biological Process]---GO:0030154///cell differe…	cellular_component+++molecular_function+++biological_process	[Cellular Component]---protein-containing complex+++organelle+++cell part+++cell+++[Molecular Function]---binding+++catalytic activity+++molecular function regulator+++[Biological Process]---reproduction+++multi-organism process+++positive regulation of biological process+++developmental process+++multicellular organismal process+++cellular process+++negative regulation of biological process+++bi…
171992	acd-2	mRNA	[Cellular Component]---GO:0016021///integral component of membrane+++GO:0016020///membrane+++[Molecular Function]---GO:0005272///sodium channel activity+++[Biological Process]---GO:0035725///sodium ion transmembrane transport+++GO:0006814///sodium ion transport+++GO:0006811///ion transport	cellular_component+++molecular_function+++biological_process	[Cellular Component]---membrane part+++membrane+++[Molecular Function]---transporter activity+++[Biological Process]---localization
184508	efn-3	mRNA	[Cellular Component]---GO:0005886///plasma membrane+++GO:0016020///membrane+++[Molecular Function]---GO:0046875///ephrin receptor binding+++[Biological Process]---GO:0007411///axon guidance+++GO:0048013///ephrin receptor signaling pathway	cellular_component+++molecular_function+++biological_process	[Cellular Component]---cell part+++cell+++membrane+++[Molecular Function]---binding+++[Biological Process]---developmental process+++cellular process+++multicellular organismal process+++signaling+++biological regulation+++regulation of biological process+++cellular component organization or biogenesis+++response to stimulus+++locomotion
172710	F53B6.7	mRNA	[Molecular Function]---GO:0016791///phosphatase activity+++[Biological Process]---GO:0016311///dephosphorylation	molecular_function+++biological_process	[Molecular Function]---catalytic activity+++[Biological Process]---cellular process+++metabolic process
176484	Y39A1A.9	mRNA	[Cellular Component]---GO:0005634///nucleus+++GO:0005737///cytoplasm+++[Biological Process]---GO:0048255///mRNA stabilization+++GO:0007141///male meiosis I+++GO:0051321///meiotic cell cycle+++GO:0007144///female meiosis I	cellular_component+++biological_process	[Cellular Component]---organelle+++cell part+++cell+++[Biological Process]---reproduction+++multi-organism process+++positive regulation of biological process+++cellular process+++multicellular organismal process+++negative regulation of biological process+++biological regulation+++metabolic process+++reproductive process+++regulation of biological process+++cellular component organization or bio…
177300	Y59E9AR.7	mRNA	[Cellular Component]---GO:0031143///pseudopodium+++GO:0005856///cytoskeleton+++GO:0005737///cytoplasm	cellular_component	[Cellular Component]---organelle+++cell part+++cell
182541	fipr-8	mRNA	[Biological Process]---GO:0098542///defense response to other organism	biological_process	[Biological Process]---multi-organism process+++response to stimulus
180632	dhs-27	mRNA	[Cellular Component]---GO:0016021///integral component of membrane+++GO:0016020///membrane+++[Molecular Function]---GO:0016491///oxidoreductase activity+++[Biological Process]---GO:0055114///oxidation-reduction process	cellular_component+++molecular_function+++biological_process	[Cellular Component]---membrane part+++membrane+++[Molecular Function]---catalytic activity+++[Biological Process]---metabolic process
185826	scrm-6	mRNA	[Cellular Component]---GO:0016020///membrane+++[Molecular Function]---GO:0017128///phospholipid scramblase activity+++GO:0005515///protein binding+++[Biological Process]---GO:0017121///phospholipid scrambling	cellular_component+++molecular_function+++biological_process	[Cellular Component]---membrane+++[Molecular Function]---transporter activity+++binding+++[Biological Process]---cellular process+++biological regulation+++cellular component organization or biogenesis
186007	clec-33	mRNA	[Cellular Component]---GO:0016021///integral component of membrane+++GO:0016020///membrane+++[Molecular Function]---GO:0030246///carbohydrate binding	cellular_component+++molecular_function	[Cellular Component]---membrane part+++membrane+++[Molecular Function]---binding
182276	nhr-76	mRNA	[Cellular Component]---GO:0005634///nucleus+++[Molecular Function]---GO:0003677///DNA binding+++GO:0043565///sequence-specific DNA binding+++GO:0008270///zinc ion binding+++GO:0005515///protein binding+++GO:0003700///DNA-binding transcription factor activity+++GO:0046872///metal ion binding+++[Biological Process]---GO:0097235///positive regulation of fatty acid beta-oxidation by positive regulati…	cellular_component+++molecular_function+++biological_process	[Cellular Component]---organelle+++cell+++cell part+++[Molecular Function]---transcription regulator activity+++binding+++[Biological Process]---regulation of biological process+++positive regulation of biological process+++cellular process+++biological regulation+++metabolic process
179296	col-144	mRNA	[Cellular Component]---GO:0005581///collagen trimer+++[Molecular Function]---GO:0042302///structural constituent of cuticle+++[Biological Process]---GO:0002164///larval development	cellular_component+++molecular_function+++biological_process	[Cellular Component]---protein-containing complex+++[Molecular Function]---structural molecule activity+++[Biological Process]---developmental process+++multicellular organismal process
177802	msp-76	mRNA	[Cellular Component]---GO:0031143///pseudopodium+++GO:0005856///cytoskeleton+++GO:0005737///cytoplasm	cellular_component	[Cellular Component]---organelle+++cell part+++cell
24104282	col-175	mRNA	[Cellular Component]---GO:0005581///collagen trimer+++[Molecular Function]---GO:0042302///structural constituent of cuticle	cellular_component+++molecular_function	[Cellular Component]---protein-containing complex+++[Molecular Function]---structural molecule activity
172952	lam-3	mRNA	[Cellular Component]---GO:0005604///basement membrane	cellular_component	[Cellular Component]---extracellular region part+++extracellular region
181573	unc-3	mRNA	[Cellular Component]---GO:0000790///nuclear chromatin+++GO:0005634///nucleus+++[Molecular Function]---GO:0046872///metal ion binding+++GO:0046983///protein dimerization activity+++GO:0003700///DNA-binding transcription factor activity+++GO:0035035///histone acetyltransferase binding+++GO:0000977///RNA polymerase II regulatory region sequence-specific DNA binding+++GO:0003677///DNA binding+++GO:00…	cellular_component+++molecular_function+++biological_process	[Cellular Component]---organelle+++cell part+++membrane-enclosed lumen+++cell+++organelle part+++[Molecular Function]---transcription regulator activity+++binding+++[Biological Process]---positive regulation of biological process+++developmental process+++multicellular organismal process+++cellular process+++biological regulation+++metabolic process+++regulation of biological process+++cellular c…
181664	wrt-4	mRNA	[Cellular Component]---GO:0005615///extracellular space+++GO:0005576///extracellular region+++GO:0005886///plasma membrane+++GO:0009986///cell surface+++GO:0016020///membrane+++[Molecular Function]---GO:0008233///peptidase activity+++GO:0003674///molecular_function+++GO:0016787///hydrolase activity+++[Biological Process]---GO:0007267///cell-cell signaling+++GO:0016539///intein-mediated protein sp…	cellular_component+++molecular_function+++biological_process	[Cellular Component]---extracellular region part+++cell part+++extracellular region+++cell+++membrane+++[Molecular Function]---catalytic activity+++molecular_function+++[Biological Process]---developmental process+++multicellular organismal process+++cellular process+++signaling+++metabolic process
174551	C05C10.5	mRNA	[Molecular Function]---GO:0005515///protein binding	molecular_function	[Molecular Function]---binding
188362	cyp-13A7	mRNA	[Cellular Component]---GO:0016021///integral component of membrane+++[Molecular Function]---GO:0046872///metal ion binding+++GO:0020037///heme binding+++GO:0005506///iron ion binding+++GO:0016491///oxidoreductase activity+++GO:0004497///monooxygenase activity+++GO:0016705///oxidoreductase activity, acting on paired donors, with incorporation or reduction of molecular oxygen+++[Biological Process]…	cellular_component+++molecular_function+++biological_process	[Cellular Component]---membrane part+++membrane+++[Molecular Function]---binding+++catalytic activity+++[Biological Process]---metabolic process
190458	aptf-2	mRNA	[Cellular Component]---GO:0005634///nucleus+++GO:0005737///cytoplasm+++[Molecular Function]---GO:0003700///DNA-binding transcription factor activity+++GO:0000977///RNA polymerase II regulatory region sequence-specific DNA binding+++GO:0000981///DNA-binding transcription factor activity, RNA polymerase II-specific+++[Biological Process]---GO:0006355///regulation of transcription, DNA-templated+++G…	cellular_component+++molecular_function+++biological_process	[Cellular Component]---organelle+++cell part+++cell+++[Molecular Function]---transcription regulator activity+++binding+++[Biological Process]---cellular process+++biological regulation+++metabolic process+++regulation of biological process
176899	kvs-5	mRNA	[Cellular Component]---GO:0016021///integral component of membrane+++GO:0005886///plasma membrane+++GO:0008076///voltage-gated potassium channel complex+++GO:0016020///membrane+++[Molecular Function]---GO:0005267///potassium channel activity+++GO:0005244///voltage-gated ion channel activity+++GO:0005216///ion channel activity+++GO:0005249///voltage-gated potassium channel activity+++[Biological P…	cellular_component+++molecular_function+++biological_process	[Cellular Component]---protein-containing complex+++cell part+++membrane part+++cell+++membrane+++[Molecular Function]---transporter activity+++[Biological Process]---cellular process+++biological regulation+++regulation of biological process+++cellular component organization or biogenesis+++localization
3565398	Y105E8A.27	mRNA	[Cellular Component]---GO:0016021///integral component of membrane+++GO:0016020///membrane	cellular_component	[Cellular Component]---membrane part+++membrane
178635	cnc-4	mRNA	[Cellular Component]---GO:0016021///integral component of membrane+++GO:0016020///membrane+++[Biological Process]---GO:0045087///innate immune response	cellular_component+++biological_process	[Cellular Component]---membrane part+++membrane+++[Biological Process]---immune system process+++response to stimulus
183023	C29F9.6	mRNA	[Cellular Component]---GO:0005634///nucleus+++[Molecular Function]---GO:0003712///transcription coregulator activity+++GO:0046872///metal ion binding+++GO:0008270///zinc ion binding+++GO:0004402///histone acetyltransferase activity+++[Biological Process]---GO:0006355///regulation of transcription, DNA-templated+++GO:0016573///histone acetylation	cellular_component+++molecular_function+++biological_process	[Cellular Component]---organelle+++cell part+++cell+++[Molecular Function]---binding+++transcription regulator activity+++catalytic activity+++[Biological Process]---cellular process+++biological regulation+++metabolic process+++regulation of biological process+++cellular component organization or biogenesis
191306	ZK381.2	mRNA	[Cellular Component]---GO:0016021///integral component of membrane+++GO:0016020///membrane+++[Molecular Function]---GO:0016757///transferase activity, transferring glycosyl groups+++GO:0016740///transferase activity	cellular_component+++molecular_function	[Cellular Component]---membrane part+++membrane+++[Molecular Function]---catalytic activity
178065	cyp-31A2	mRNA	[Molecular Function]---GO:0016705///oxidoreductase activity, acting on paired donors, with incorporation or reduction of molecular oxygen+++GO:0004497///monooxygenase activity+++GO:0020037///heme binding+++GO:0005506///iron ion binding+++[Biological Process]---GO:0030703///eggshell formation+++GO:0008356///asymmetric cell division+++GO:0040038///polar body extrusion after meiotic divisions+++GO:0…	molecular_function+++biological_process	[Molecular Function]---binding+++catalytic activity+++[Biological Process]---reproduction+++multi-organism process+++developmental process+++multicellular organismal process+++cellular process+++metabolic process+++reproductive process+++cellular component organization or biogenesis
180158	ztf-25	mRNA	[Molecular Function]---GO:0003676///nucleic acid binding	molecular_function	[Molecular Function]---binding
184599	ent-5	mRNA	[Cellular Component]---GO:0016021///integral component of membrane+++GO:0005886///plasma membrane+++GO:0016020///membrane+++[Molecular Function]---GO:0005337///nucleoside transmembrane transporter activity+++[Biological Process]---GO:1901642///nucleoside transmembrane transport	cellular_component+++molecular_function+++biological_process	[Cellular Component]---cell part+++membrane part+++cell+++membrane+++[Molecular Function]---transporter activity+++[Biological Process]---localization
4363054	Y71H2AM.25	mRNA	[Cellular Component]---GO:0005615///extracellular space+++GO:0016021///integral component of membrane+++GO:0005764///lysosome+++GO:0016020///membrane+++[Molecular Function]---GO:0004197///cysteine-type endopeptidase activity+++GO:0008234///cysteine-type peptidase activity+++[Biological Process]---GO:0006508///proteolysis+++GO:0051603///proteolysis involved in cellular protein catabolic process	cellular_component+++molecular_function+++biological_process	[Cellular Component]---extracellular region part+++organelle+++cell part+++membrane part+++extracellular region+++membrane+++cell+++[Molecular Function]---catalytic activity+++[Biological Process]---cellular process+++metabolic process
172211	cey-3	mRNA	[Cellular Component]---GO:1990904///ribonucleoprotein complex+++[Molecular Function]---GO:0003677///DNA binding+++GO:0043021///ribonucleoprotein complex binding+++GO:0003676///nucleic acid binding+++[Biological Process]---GO:0006355///regulation of transcription, DNA-templated	cellular_component+++molecular_function+++biological_process	[Cellular Component]---protein-containing complex+++[Molecular Function]---binding+++[Biological Process]---cellular process+++biological regulation+++metabolic process+++regulation of biological process
178660	hsp-16.41	mRNA	[Molecular Function]---GO:0051082///unfolded protein binding+++[Biological Process]---GO:0030968///endoplasmic reticulum unfolded protein response+++GO:0009408///response to heat	molecular_function+++biological_process	[Molecular Function]---binding+++[Biological Process]---cellular process+++signaling+++biological regulation+++regulation of biological process+++response to stimulus
191665	gur-5	mRNA	[Cellular Component]---GO:0016021///integral component of membrane+++GO:0016020///membrane	cellular_component	[Cellular Component]---membrane part+++membrane
173928	F07F6.1	mRNA	[Molecular Function]---GO:0003676///nucleic acid binding	molecular_function	[Molecular Function]---binding
183808	nhr-172	mRNA	[Cellular Component]---GO:0005634///nucleus+++[Molecular Function]---GO:0046872///metal ion binding+++GO:0008270///zinc ion binding+++GO:0003700///DNA-binding transcription factor activity+++GO:0003677///DNA binding+++GO:0043565///sequence-specific DNA binding+++[Biological Process]---GO:0006355///regulation of transcription, DNA-templated	cellular_component+++molecular_function+++biological_process	[Cellular Component]---organelle+++cell part+++cell+++[Molecular Function]---transcription regulator activity+++binding+++[Biological Process]---cellular process+++biological regulation+++metabolic process+++regulation of biological process
181766	F10D7.3	mRNA	[Cellular Component]---GO:0005623///cell+++[Molecular Function]---GO:0015035///protein disulfide oxidoreductase activity+++GO:0046872///metal ion binding+++GO:0009055///electron transfer activity+++GO:0004362///glutathione-disulfide reductase activity+++GO:0051537///2 iron, 2 sulfur cluster binding+++GO:0051536///iron-sulfur cluster binding+++[Biological Process]---GO:0098869///cellular oxidant d…	cellular_component+++molecular_function+++biological_process	[Cellular Component]---cell+++[Molecular Function]---binding+++catalytic activity+++antioxidant activity+++[Biological Process]---cellular process+++detoxification+++biological regulation+++metabolic process+++regulation of biological process+++response to stimulus
184560	nhr-178	mRNA	[Cellular Component]---GO:0005634///nucleus+++[Molecular Function]---GO:0046872///metal ion binding+++GO:0008270///zinc ion binding+++GO:0003700///DNA-binding transcription factor activity+++GO:0003677///DNA binding+++GO:0043565///sequence-specific DNA binding+++[Biological Process]---GO:0006355///regulation of transcription, DNA-templated	cellular_component+++molecular_function+++biological_process	[Cellular Component]---organelle+++cell part+++cell+++[Molecular Function]---transcription regulator activity+++binding+++[Biological Process]---cellular process+++biological regulation+++metabolic process+++regulation of biological process
191058	fbxa-30	mRNA	[Biological Process]---GO:0045087///innate immune response	biological_process	[Biological Process]---immune system process+++response to stimulus
189082	W01B6.5	mRNA	[Cellular Component]---GO:0031234///extrinsic component of cytoplasmic side of plasma membrane+++[Molecular Function]---GO:0004713///protein tyrosine kinase activity+++GO:0000166///nucleotide binding+++GO:0004715///non-membrane spanning protein tyrosine kinase activity+++GO:0004672///protein kinase activity+++GO:0016740///transferase activity+++GO:0005524///ATP binding+++GO:0016301///kinase activ…	cellular_component+++molecular_function+++biological_process	[Cellular Component]---cell part+++membrane part+++cell+++membrane+++[Molecular Function]---binding+++catalytic activity+++[Biological Process]---cellular process+++biological regulation+++metabolic process+++regulation of biological process+++cell proliferation
172480	eat-5	mRNA	[Cellular Component]---GO:0016021///integral component of membrane+++GO:0005886///plasma membrane+++GO:0005921///gap junction+++GO:0030054///cell junction+++GO:0016020///membrane+++[Molecular Function]---GO:0005243///gap junction channel activity+++GO:0055077///gap junction hemi-channel activity+++[Biological Process]---GO:0055085///transmembrane transport+++GO:0006811///ion transport	cellular_component+++molecular_function+++biological_process	[Cellular Component]---cell part+++membrane part+++cell junction+++cell+++membrane+++[Molecular Function]---transporter activity+++[Biological Process]---localization
185101	ocr-1	mRNA	[Cellular Component]---GO:0016021///integral component of membrane+++GO:0005887///integral component of plasma membrane+++GO:0016020///membrane+++[Molecular Function]---GO:0005216///ion channel activity+++GO:0005262///calcium channel activity+++[Biological Process]---GO:0055085///transmembrane transport+++GO:0070588///calcium ion transmembrane transport+++GO:0034220///ion transmembrane transport+…	cellular_component+++molecular_function+++biological_process	[Cellular Component]---cell part+++membrane part+++cell+++membrane+++[Molecular Function]---transporter activity+++[Biological Process]---localization
182028	scl-23	mRNA	[Cellular Component]---GO:0005615///extracellular space+++GO:0016021///integral component of membrane+++GO:0016020///membrane	cellular_component	[Cellular Component]---extracellular region part+++membrane part+++extracellular region+++membrane
178910	C52A10.2	mRNA	[Cellular Component]---GO:0005737///cytoplasm+++GO:0005886///plasma membrane+++[Molecular Function]---GO:0016787///hydrolase activity	cellular_component+++molecular_function	[Cellular Component]---cell part+++membrane+++cell+++[Molecular Function]---catalytic activity
184903	F23F1.6	mRNA	[Cellular Component]---GO:0016021///integral component of membrane+++GO:0016020///membrane+++[Molecular Function]---GO:0022857///transmembrane transporter activity+++[Biological Process]---GO:0055085///transmembrane transport+++GO:0006865///amino acid transport	cellular_component+++molecular_function+++biological_process	[Cellular Component]---membrane part+++membrane+++[Molecular Function]---transporter activity+++[Biological Process]---localization
176407	gln-2	mRNA	[Cellular Component]---GO:0005737///cytoplasm+++[Molecular Function]---GO:0004356///glutamate-ammonia ligase activity+++GO:0000166///nucleotide binding+++GO:0016874///ligase activity+++GO:0005524///ATP binding+++GO:0003824///catalytic activity+++[Biological Process]---GO:0006807///nitrogen compound metabolic process+++GO:0006542///glutamine biosynthetic process	cellular_component+++molecular_function+++biological_process	[Cellular Component]---cell part+++cell+++[Molecular Function]---binding+++catalytic activity+++[Biological Process]---cellular process+++metabolic process
175170	col-88	mRNA	[Cellular Component]---GO:0016021///integral component of membrane+++GO:0005581///collagen trimer+++GO:0016020///membrane+++[Molecular Function]---GO:0042302///structural constituent of cuticle	cellular_component+++molecular_function	[Cellular Component]---protein-containing complex+++membrane part+++membrane+++[Molecular Function]---structural molecule activity
174461	sym-2	mRNA	[Cellular Component]---GO:0005634///nucleus+++[Molecular Function]---GO:0003723///RNA binding+++GO:0003676///nucleic acid binding+++[Biological Process]---GO:0006397///mRNA processing+++GO:0008380///RNA splicing+++GO:0050879///multicellular organismal movement+++GO:0009792///embryo development ending in birth or egg hatching+++GO:0010172///embryonic body morphogenesis+++GO:0043484///regulation of…	cellular_component+++molecular_function+++biological_process	[Cellular Component]---organelle+++cell part+++cell+++[Molecular Function]---binding+++[Biological Process]---developmental process+++multicellular organismal process+++cellular process+++biological regulation+++metabolic process+++regulation of biological process
178926	cyp-14A5	mRNA	[Molecular Function]---GO:0016705///oxidoreductase activity, acting on paired donors, with incorporation or reduction of molecular oxygen+++GO:0004497///monooxygenase activity+++GO:0020037///heme binding+++GO:0005506///iron ion binding	molecular_function	[Molecular Function]---binding+++catalytic activity
259993	T19A6.4	mRNA	[Cellular Component]---GO:0016021///integral component of membrane+++GO:0016020///membrane+++[Molecular Function]---GO:0015144///carbohydrate transmembrane transporter activity+++[Biological Process]---GO:0034219///carbohydrate transmembrane transport	cellular_component+++molecular_function+++biological_process	[Cellular Component]---membrane part+++membrane+++[Molecular Function]---transporter activity+++[Biological Process]---localization
175516	glb-11	mRNA	[Molecular Function]---GO:0020037///heme binding+++GO:0019825///oxygen binding	molecular_function	[Molecular Function]---binding
184810	F22B5.6	mRNA	[Cellular Component]---GO:0016021///integral component of membrane+++GO:0016020///membrane	cellular_component	[Cellular Component]---membrane part+++membrane
172559	F55D12.6	mRNA	[Cellular Component]---GO:0016021///integral component of membrane+++GO:0016020///membrane	cellular_component	[Cellular Component]---membrane part+++membrane
177151	clec-67	mRNA	[Molecular Function]---GO:0030246///carbohydrate binding+++[Biological Process]---GO:0045087///innate immune response	molecular_function+++biological_process	[Molecular Function]---binding+++[Biological Process]---immune system process+++response to stimulus
183952	D2045.5	mRNA	[Cellular Component]---GO:0005737///cytoplasm+++GO:0005634///nucleus+++[Molecular Function]---GO:0004674///protein serine/threonine kinase activity+++GO:0000166///nucleotide binding+++GO:0004672///protein kinase activity+++GO:0005524///ATP binding+++[Biological Process]---GO:0018107///peptidyl-threonine phosphorylation+++GO:0018105///peptidyl-serine phosphorylation+++GO:0006468///protein phosphor…	cellular_component+++molecular_function+++biological_process	[Cellular Component]---organelle+++cell part+++cell+++[Molecular Function]---binding+++catalytic activity+++[Biological Process]---cellular process+++metabolic process
186791	H27M09.5	mRNA	[Cellular Component]---GO:0016021///integral component of membrane+++GO:0016020///membrane	cellular_component	[Cellular Component]---membrane part+++membrane
182330	glb-2	mRNA	[Molecular Function]---GO:0020037///heme binding+++GO:0019825///oxygen binding	molecular_function	[Molecular Function]---binding
185226	col-54	mRNA	[Cellular Component]---GO:0016021///integral component of membrane+++GO:0005581///collagen trimer+++GO:0016020///membrane+++[Molecular Function]---GO:0042302///structural constituent of cuticle	cellular_component+++molecular_function	[Cellular Component]---protein-containing complex+++membrane part+++membrane+++[Molecular Function]---structural molecule activity
187919	mpst-7	mRNA	[Cellular Component]---GO:0016021///integral component of membrane+++GO:0016020///membrane+++[Molecular Function]---GO:0016740///transferase activity	cellular_component+++molecular_function	[Cellular Component]---membrane part+++membrane+++[Molecular Function]---catalytic activity
189697	Y38H6C.16	mRNA	[Cellular Component]---GO:0016021///integral component of membrane+++GO:0016020///membrane+++[Molecular Function]---GO:0047750///cholestenol delta-isomerase activity+++[Biological Process]---GO:0016125///sterol metabolic process	cellular_component+++molecular_function+++biological_process	[Cellular Component]---membrane part+++membrane+++[Molecular Function]---catalytic activity+++[Biological Process]---metabolic process
182741	C17G1.2	mRNA	[Cellular Component]---GO:0016021///integral component of membrane+++GO:0016020///membrane	cellular_component	[Cellular Component]---membrane part+++membrane
177263	E03H12.7	mRNA	[Cellular Component]---GO:0016021///integral component of membrane+++GO:0016020///membrane+++[Biological Process]---GO:0033692///cellular polysaccharide biosynthetic process	cellular_component+++biological_process	[Cellular Component]---membrane part+++membrane+++[Biological Process]---cellular process+++metabolic process
188141	T05G5.4	mRNA	[Cellular Component]---GO:0016021///integral component of membrane+++GO:0016020///membrane	cellular_component	[Cellular Component]---membrane part+++membrane
174124	C44B7.5	mRNA	[Cellular Component]---GO:0005576///extracellular region	cellular_component	[Cellular Component]---extracellular region
181195	rrc-1	mRNA	[Cellular Component]---GO:0005575///cellular_component+++[Molecular Function]---GO:0005096///GTPase activator activity+++GO:0005515///protein binding+++[Biological Process]---GO:0043547///positive regulation of GTPase activity+++GO:0007165///signal transduction+++GO:0007264///small GTPase mediated signal transduction	cellular_component+++molecular_function+++biological_process	[Cellular Component]---cellular_component+++[Molecular Function]---binding+++molecular function regulator+++[Biological Process]---cellular process+++signaling+++biological regulation+++regulation of biological process+++response to stimulus
182485	C10A4.4	mRNA	[Cellular Component]---GO:0016021///integral component of membrane+++GO:0016020///membrane	cellular_component	[Cellular Component]---membrane part+++membrane
178270	F58D2.2	mRNA	[Cellular Component]---GO:0016021///integral component of membrane+++GO:0016020///membrane	cellular_component	[Cellular Component]---membrane part+++membrane
178998	atf-8	mRNA	[Cellular Component]---GO:0005634///nucleus+++[Molecular Function]---GO:0003700///DNA-binding transcription factor activity+++GO:0000977///RNA polymerase II regulatory region sequence-specific DNA binding+++GO:0001228///DNA-binding transcription activator activity, RNA polymerase II-specific+++[Biological Process]---GO:0006355///regulation of transcription, DNA-templated+++GO:0006357///regulation…	cellular_component+++molecular_function+++biological_process	[Cellular Component]---organelle+++cell part+++cell+++[Molecular Function]---transcription regulator activity+++binding+++[Biological Process]---positive regulation of biological process+++cellular process+++biological regulation+++metabolic process+++regulation of biological process
172796	K07A1.5	mRNA	[Cellular Component]---GO:0016021///integral component of membrane+++GO:0016020///membrane	cellular_component	[Cellular Component]---membrane part+++membrane
181834	B0207.1	mRNA	[Molecular Function]---GO:0016787///hydrolase activity+++GO:0004721///phosphoprotein phosphatase activity+++GO:0004725///protein tyrosine phosphatase activity+++GO:0016791///phosphatase activity+++[Biological Process]---GO:0016311///dephosphorylation+++GO:0035335///peptidyl-tyrosine dephosphorylation+++GO:0006470///protein dephosphorylation	molecular_function+++biological_process	[Molecular Function]---catalytic activity+++[Biological Process]---cellular process+++metabolic process
173153	Y18D10A.11	mRNA	[Cellular Component]---GO:0016021///integral component of membrane+++GO:0016020///membrane	cellular_component	[Cellular Component]---membrane part+++membrane
178805	nlp-29	mRNA	[Cellular Component]---GO:0005615///extracellular space+++GO:0005576///extracellular region+++[Molecular Function]---GO:0071855///neuropeptide receptor binding+++[Biological Process]---GO:0050832///defense response to fungus+++GO:0007218///neuropeptide signaling pathway+++GO:0098542///defense response to other organism+++GO:0031640///killing of cells of other organism+++GO:0042742///defense respo…	cellular_component+++molecular_function+++biological_process	[Cellular Component]---extracellular region part+++extracellular region+++[Molecular Function]---binding+++[Biological Process]---multi-organism process+++cellular process+++signaling+++biological regulation+++regulation of biological process+++cell killing+++response to stimulus
178797	R08F11.4	mRNA	[Cellular Component]---GO:0005737///cytoplasm+++[Molecular Function]---GO:0008757///S-adenosylmethionine-dependent methyltransferase activity+++[Biological Process]---GO:0032259///methylation	cellular_component+++molecular_function+++biological_process	[Cellular Component]---cell+++cell part+++[Molecular Function]---catalytic activity+++[Biological Process]---metabolic process
176405	K03H1.9	mRNA	[Cellular Component]---GO:0016021///integral component of membrane+++GO:0016020///membrane	cellular_component	[Cellular Component]---membrane part+++membrane
186382	F56D5.3	mRNA	[Molecular Function]---GO:0010181///FMN binding+++GO:0016491///oxidoreductase activity+++GO:0003824///catalytic activity+++[Biological Process]---GO:0055114///oxidation-reduction process	molecular_function+++biological_process	[Molecular Function]---binding+++catalytic activity+++[Biological Process]---metabolic process
180128	F09C6.1	mRNA	[Molecular Function]---GO:0051015///actin filament binding+++GO:0030674///protein binding, bridging	molecular_function	[Molecular Function]---binding
173872	ify-1	mRNA	[Cellular Component]---GO:0000793///condensed chromosome+++GO:0005876///spindle microtubule+++GO:0005856///cytoskeleton+++GO:0005819///spindle+++GO:0005694///chromosome+++GO:0005737///cytoplasm+++[Molecular Function]---GO:0002020///protease binding+++GO:0031625///ubiquitin protein ligase binding+++GO:0005515///protein binding+++[Biological Process]---GO:0051642///centrosome localization+++GO:0000…	cellular_component+++molecular_function+++biological_process	[Cellular Component]---supramolecular complex+++organelle+++cell part+++cell+++organelle part+++[Molecular Function]---binding+++[Biological Process]---reproduction+++multi-organism process+++multicellular organismal process+++cellular process+++negative regulation of biological process+++biological regulation+++reproductive process+++regulation of biological process+++cellular component organiza…
173979	acdh-8	mRNA	[Cellular Component]---GO:0005739///mitochondrion+++[Molecular Function]---GO:0070991///medium-chain-acyl-CoA dehydrogenase activity+++GO:0016491///oxidoreductase activity+++GO:0003995///acyl-CoA dehydrogenase activity+++GO:0050660///flavin adenine dinucleotide binding+++GO:0016627///oxidoreductase activity, acting on the CH-CH group of donors+++[Biological Process]---GO:0006635///fatty acid beta…	cellular_component+++molecular_function+++biological_process	[Cellular Component]---organelle+++cell part+++cell+++[Molecular Function]---binding+++catalytic activity+++[Biological Process]---cellular process+++metabolic process
175498	maph-1.3	mRNA	[Cellular Component]---GO:0005874///microtubule+++[Molecular Function]---GO:0008017///microtubule binding+++[Biological Process]---GO:0000226///microtubule cytoskeleton organization	cellular_component+++molecular_function+++biological_process	[Cellular Component]---supramolecular complex+++organelle+++cell part+++cell+++organelle part+++[Molecular Function]---binding+++[Biological Process]---cellular process+++cellular component organization or biogenesis
13181077	T28B8.4	mRNA	[Cellular Component]---GO:0005839///proteasome core complex+++GO:0005634///nucleus+++GO:0005829///cytosol+++[Molecular Function]---GO:0016504///peptidase activator activity+++GO:0070628///proteasome binding+++GO:0070577///lysine-acetylated histone binding+++[Biological Process]---GO:0010952///positive regulation of peptidase activity+++GO:0010499///proteasomal ubiquitin-independent protein catabo…	cellular_component+++molecular_function+++biological_process	[Cellular Component]---protein-containing complex+++organelle+++cell part+++cell+++[Molecular Function]---binding+++molecular function regulator+++[Biological Process]---positive regulation of biological process+++cellular process+++biological regulation+++metabolic process+++regulation of biological process
174907	cnp-2	mRNA	[Molecular Function]---GO:0005515///protein binding	molecular_function	[Molecular Function]---binding
189083	W01B6.6	mRNA	[Molecular Function]---GO:0004725///protein tyrosine phosphatase activity+++GO:0016791///phosphatase activity+++[Biological Process]---GO:0016311///dephosphorylation+++GO:0035335///peptidyl-tyrosine dephosphorylation+++GO:0006470///protein dephosphorylation	molecular_function+++biological_process	[Molecular Function]---catalytic activity+++[Biological Process]---cellular process+++metabolic process
172415	smz-2	mRNA	[Cellular Component]---GO:0000790///nuclear chromatin+++GO:0000785///chromatin+++[Biological Process]---GO:0007060///male meiosis chromosome segregation	cellular_component+++biological_process	[Cellular Component]---organelle+++cell part+++membrane-enclosed lumen+++cell+++organelle part+++[Biological Process]---reproduction+++multi-organism process+++cellular process+++multicellular organismal process+++reproductive process+++cellular component organization or biogenesis
190659	clec-210	mRNA	[Molecular Function]---GO:0030246///carbohydrate binding+++[Biological Process]---GO:0045087///innate immune response	molecular_function+++biological_process	[Molecular Function]---binding+++[Biological Process]---immune system process+++response to stimulus
184113	his-49	mRNA	[Cellular Component]---GO:0005634///nucleus+++GO:0000786///nucleosome+++[Molecular Function]---GO:0046982///protein heterodimerization activity+++GO:0031492///nucleosomal DNA binding+++[Biological Process]---GO:0006334///nucleosome assembly	cellular_component+++molecular_function+++biological_process	[Cellular Component]---protein-containing complex+++organelle+++cell part+++cell+++organelle part+++[Molecular Function]---binding+++[Biological Process]---cellular process+++cellular component organization or biogenesis
176260	cdc-25.3	mRNA	[Cellular Component]---GO:0005634///nucleus+++GO:0005737///cytoplasm+++[Molecular Function]---GO:0016787///hydrolase activity+++GO:0004721///phosphoprotein phosphatase activity+++GO:0004725///protein tyrosine phosphatase activity+++[Biological Process]---GO:0000278///mitotic cell cycle+++GO:1902751///positive regulation of cell cycle G2/M phase transition+++GO:0035335///peptidyl-tyrosine dephosph…	cellular_component+++molecular_function+++biological_process	[Cellular Component]---organelle+++cell part+++cell+++[Molecular Function]---catalytic activity+++[Biological Process]---reproduction+++positive regulation of biological process+++cellular process+++biological regulation+++metabolic process+++reproductive process+++regulation of biological process
177275	msp-53	mRNA	[Cellular Component]---GO:0031143///pseudopodium+++GO:0005856///cytoskeleton+++GO:0005737///cytoplasm	cellular_component	[Cellular Component]---organelle+++cell part+++cell
185978	nlp-3	mRNA	[Biological Process]---GO:0007218///neuropeptide signaling pathway	biological_process	[Biological Process]---cellular process+++signaling+++biological regulation+++regulation of biological process+++response to stimulus
3565564	C10H11.7	mRNA	[Cellular Component]---GO:0005856///cytoskeleton	cellular_component	[Cellular Component]---organelle+++cell part+++cell
28661655	T16G12.12	mRNA	[Cellular Component]---GO:0016021///integral component of membrane+++GO:0016020///membrane	cellular_component	[Cellular Component]---membrane part+++membrane
180815	pks-1	mRNA	[Molecular Function]---GO:0031177///phosphopantetheine binding+++GO:0016788///hydrolase activity, acting on ester bonds+++GO:0016740///transferase activity+++GO:0003824///catalytic activity+++[Biological Process]---GO:0009058///biosynthetic process	molecular_function+++biological_process	[Molecular Function]---binding+++catalytic activity+++[Biological Process]---metabolic process
172810	dhs-4	mRNA	[Cellular Component]---GO:0005811///lipid droplet	cellular_component	[Cellular Component]---organelle+++cell part+++cell
176854	col-101	mRNA	[Cellular Component]---GO:0016021///integral component of membrane+++GO:0005581///collagen trimer+++GO:0016020///membrane+++[Molecular Function]---GO:0042302///structural constituent of cuticle	cellular_component+++molecular_function	[Cellular Component]---protein-containing complex+++membrane part+++membrane+++[Molecular Function]---structural molecule activity
181658	gpn-1	mRNA	[Cellular Component]---GO:0062023///collagen-containing extracellular matrix+++GO:0046658///anchored component of plasma membrane+++[Biological Process]---GO:0002119///nematode larval development+++GO:0048730///epidermis morphogenesis+++GO:0009792///embryo development ending in birth or egg hatching+++GO:0001764///neuron migration+++GO:0009966///regulation of signal transduction	cellular_component+++biological_process	[Cellular Component]---extracellular region part+++cell part+++membrane part+++extracellular region+++cell+++membrane+++[Biological Process]---developmental process+++cellular process+++multicellular organismal process+++signaling+++biological regulation+++regulation of biological process+++response to stimulus+++localization+++locomotion
178296	mex-5	mRNA	[Cellular Component]---GO:0043186///P granule+++GO:0005813///centrosome+++GO:0005737///cytoplasm+++GO:0005829///cytosol+++[Molecular Function]---GO:0046872///metal ion binding+++GO:0008187///poly-pyrimidine tract binding+++GO:0019901///protein kinase binding+++GO:0003723///RNA binding+++GO:0003730///mRNA 3'-UTR binding+++GO:0003677///DNA binding+++GO:0019904///protein domain specific binding+++[B…	cellular_component+++molecular_function+++biological_process	[Cellular Component]---protein-containing complex+++organelle+++cell part+++cell+++organelle part+++[Molecular Function]---binding+++[Biological Process]---positive regulation of biological process+++developmental process+++cellular process+++multicellular organismal process+++negative regulation of biological process+++metabolic process+++biological regulation+++regulation of biological process+…
185932	F47D12.3	mRNA	[Biological Process]---GO:0051260///protein homooligomerization	biological_process	[Biological Process]---cellular process+++cellular component organization or biogenesis
177409	lgc-10	mRNA	[Cellular Component]---GO:0016021///integral component of membrane+++GO:0045202///synapse+++GO:0005887///integral component of plasma membrane+++GO:0043005///neuron projection+++GO:0016020///membrane+++[Molecular Function]---GO:0004888///transmembrane signaling receptor activity+++GO:0005230///extracellular ligand-gated ion channel activity+++GO:0005216///ion channel activity+++[Biological Proces…	cellular_component+++molecular_function+++biological_process	[Cellular Component]---cell part+++membrane part+++synapse+++cell+++membrane+++[Molecular Function]---transporter activity+++molecular transducer activity+++[Biological Process]---multicellular organismal process+++cellular process+++signaling+++biological regulation+++regulation of biological process+++response to stimulus+++localization
181081	cutl-29	mRNA	[Cellular Component]---GO:0016021///integral component of membrane+++GO:0016020///membrane	cellular_component	[Cellular Component]---membrane part+++membrane
184695	abu-2	mRNA	[Biological Process]---GO:0030968///endoplasmic reticulum unfolded protein response	biological_process	[Biological Process]---cellular process+++signaling+++biological regulation+++regulation of biological process+++response to stimulus
24104675	vit-3	mRNA	[Cellular Component]---GO:0005576///extracellular region+++[Molecular Function]---GO:0045735///nutrient reservoir activity+++GO:0005319///lipid transporter activity+++[Biological Process]---GO:0006869///lipid transport	cellular_component+++molecular_function+++biological_process	[Cellular Component]---extracellular region+++[Molecular Function]---transporter activity+++nutrient reservoir activity+++[Biological Process]---localization
172740	F25H5.7	mRNA	[Molecular Function]---GO:0016787///hydrolase activity+++GO:0004721///phosphoprotein phosphatase activity+++GO:0004725///protein tyrosine phosphatase activity+++GO:0016791///phosphatase activity+++[Biological Process]---GO:0016311///dephosphorylation+++GO:0035335///peptidyl-tyrosine dephosphorylation+++GO:0006470///protein dephosphorylation	molecular_function+++biological_process	[Molecular Function]---catalytic activity+++[Biological Process]---cellular process+++metabolic process
189837	gbb-1	mRNA	[Cellular Component]---GO:0016021///integral component of membrane+++GO:1902712///G protein-coupled GABA receptor complex+++GO:0005886///plasma membrane+++GO:0038039///G protein-coupled receptor heterodimeric complex+++GO:0016020///membrane+++[Molecular Function]---GO:0004965///G protein-coupled GABA receptor activity+++GO:0004930///G protein-coupled receptor activity+++[Biological Process]---GO:…	cellular_component+++molecular_function+++biological_process	[Cellular Component]---protein-containing complex+++cell part+++membrane part+++cell+++membrane+++[Molecular Function]---molecular transducer activity+++[Biological Process]---cellular process+++signaling+++negative regulation of biological process+++biological regulation+++regulation of biological process+++response to stimulus
180908	col-168	mRNA	[Cellular Component]---GO:0016021///integral component of membrane+++GO:0005581///collagen trimer+++GO:0016020///membrane+++[Molecular Function]---GO:0042302///structural constituent of cuticle	cellular_component+++molecular_function	[Cellular Component]---protein-containing complex+++membrane part+++membrane+++[Molecular Function]---structural molecule activity
186254	F54F7.6	mRNA	[Cellular Component]---GO:0016021///integral component of membrane+++GO:0016020///membrane	cellular_component	[Cellular Component]---membrane part+++membrane
186444	F57C7.4	mRNA	[Cellular Component]---GO:0016021///integral component of membrane+++GO:0016020///membrane+++[Biological Process]---GO:0048730///epidermis morphogenesis+++GO:0007411///axon guidance+++GO:0016477///cell migration+++GO:0002119///nematode larval development+++GO:0009792///embryo development ending in birth or egg hatching	cellular_component+++biological_process	[Cellular Component]---membrane part+++membrane+++[Biological Process]---developmental process+++cellular process+++multicellular organismal process+++cellular component organization or biogenesis+++response to stimulus+++localization+++locomotion
191914	sri-40	mRNA	[Cellular Component]---GO:0016021///integral component of membrane+++GO:0016020///membrane	cellular_component	[Cellular Component]---membrane part+++membrane
353458	abu-4	mRNA	[Biological Process]---GO:0030968///endoplasmic reticulum unfolded protein response	biological_process	[Biological Process]---cellular process+++signaling+++biological regulation+++regulation of biological process+++response to stimulus
181893	odd-1	mRNA	[Cellular Component]---GO:0005634///nucleus+++[Molecular Function]---GO:0046872///metal ion binding+++GO:0000977///RNA polymerase II regulatory region sequence-specific DNA binding+++GO:0003677///DNA binding+++GO:0003676///nucleic acid binding+++[Biological Process]---GO:0000122///negative regulation of transcription by RNA polymerase II+++GO:0007275///multicellular organism development+++GO:0045…	cellular_component+++molecular_function+++biological_process	[Cellular Component]---organelle+++cell part+++cell+++[Molecular Function]---binding+++[Biological Process]---positive regulation of biological process+++developmental process+++multicellular organismal process+++cellular process+++negative regulation of biological process+++biological regulation+++metabolic process+++regulation of biological process
180517	Y102A11A.6	mRNA	[Cellular Component]---GO:0016021///integral component of membrane+++GO:0005793///endoplasmic reticulum-Golgi intermediate compartment+++GO:0016020///membrane+++[Biological Process]---GO:0006890///retrograde vesicle-mediated transport, Golgi to ER+++GO:0006888///ER to Golgi vesicle-mediated transport	cellular_component+++biological_process	[Cellular Component]---organelle+++cell part+++membrane part+++membrane+++cell+++[Biological Process]---localization
26591681	C17B7.15	mRNA	[Cellular Component]---GO:0016021///integral component of membrane	cellular_component	[Cellular Component]---membrane part+++membrane
3896758	F54H12.7	mRNA	[Cellular Component]---GO:0016021///integral component of membrane+++GO:0016020///membrane	cellular_component	[Cellular Component]---membrane part+++membrane
182160	lab-1	mRNA	[Cellular Component]---GO:0000793///condensed chromosome+++GO:0005634///nucleus+++[Molecular Function]---GO:0008157///protein phosphatase 1 binding+++GO:0005515///protein binding+++[Biological Process]---GO:1900182///positive regulation of protein localization to nucleus+++GO:1900181///negative regulation of protein localization to nucleus+++GO:0034090///maintenance of meiotic sister chromatid co…	cellular_component+++molecular_function+++biological_process	[Cellular Component]---organelle+++cell part+++cell+++[Molecular Function]---binding+++[Biological Process]---reproduction+++positive regulation of biological process+++cellular process+++negative regulation of biological process+++biological regulation+++reproductive process+++regulation of biological process+++cellular component organization or biogenesis+++localization
185456	F38B7.2	mRNA	[Cellular Component]---GO:0016021///integral component of membrane+++GO:0016020///membrane	cellular_component	[Cellular Component]---membrane part+++membrane
180080	argk-1	mRNA	[Molecular Function]---GO:0016772///transferase activity, transferring phosphorus-containing groups+++GO:0000166///nucleotide binding+++GO:0016740///transferase activity+++GO:0005524///ATP binding+++GO:0016301///kinase activity+++GO:0003824///catalytic activity+++[Biological Process]---GO:0016310///phosphorylation	molecular_function+++biological_process	[Molecular Function]---binding+++catalytic activity+++[Biological Process]---cellular process+++metabolic process
173885	F58A6.9	mRNA	[Cellular Component]---GO:0031143///pseudopodium+++GO:0005856///cytoskeleton+++GO:0005737///cytoplasm+++[Molecular Function]---GO:0008270///zinc ion binding+++GO:0003700///DNA-binding transcription factor activity+++GO:0043565///sequence-specific DNA binding+++[Biological Process]---GO:0006351///transcription, DNA-templated	cellular_component+++molecular_function+++biological_process	[Cellular Component]---organelle+++cell part+++cell+++[Molecular Function]---binding+++transcription regulator activity+++[Biological Process]---cellular process+++metabolic process
183997	E02H4.6	mRNA	[Cellular Component]---GO:0005737///cytoplasm+++GO:0005634///nucleus+++[Molecular Function]---GO:0004672///protein kinase activity+++GO:0005524///ATP binding+++[Biological Process]---GO:0018107///peptidyl-threonine phosphorylation+++GO:0018105///peptidyl-serine phosphorylation+++GO:0006468///protein phosphorylation	cellular_component+++molecular_function+++biological_process	[Cellular Component]---organelle+++cell part+++cell+++[Molecular Function]---binding+++catalytic activity+++[Biological Process]---cellular process+++metabolic process
190592	Y71F9B.15	mRNA	[Cellular Component]---GO:0016021///integral component of membrane+++GO:0016020///membrane	cellular_component	[Cellular Component]---membrane part+++membrane
178505	gln-5	mRNA	[Cellular Component]---GO:0005737///cytoplasm+++[Molecular Function]---GO:0004356///glutamate-ammonia ligase activity+++GO:0016874///ligase activity+++GO:0003824///catalytic activity+++[Biological Process]---GO:0006807///nitrogen compound metabolic process+++GO:0006542///glutamine biosynthetic process	cellular_component+++molecular_function+++biological_process	[Cellular Component]---cell part+++cell+++[Molecular Function]---catalytic activity+++[Biological Process]---cellular process+++metabolic process
171606	spe-8	mRNA	[Cellular Component]---GO:0005886///plasma membrane+++GO:0031234///extrinsic component of cytoplasmic side of plasma membrane+++GO:0005737///cytoplasm+++GO:0016020///membrane+++[Molecular Function]---GO:0004713///protein tyrosine kinase activity+++GO:0000166///nucleotide binding+++GO:0004715///non-membrane spanning protein tyrosine kinase activity+++GO:0004672///protein kinase activity+++GO:00167…	cellular_component+++molecular_function+++biological_process	[Cellular Component]---cell part+++membrane part+++membrane+++cell+++[Molecular Function]---binding+++catalytic activity+++[Biological Process]---reproduction+++multi-organism process+++developmental process+++multicellular organismal process+++cellular process+++biological regulation+++metabolic process+++reproductive process+++regulation of biological process+++cell proliferation
178008	bcc-1	mRNA	[Molecular Function]---GO:0003723///RNA binding+++GO:0003676///nucleic acid binding	molecular_function	[Molecular Function]---binding
259631	ttr-33	mRNA	[Cellular Component]---GO:0005615///extracellular space	cellular_component	[Cellular Component]---extracellular region part+++extracellular region
187838	frpr-16	mRNA	[Cellular Component]---GO:0016021///integral component of membrane+++GO:0016020///membrane+++[Molecular Function]---GO:0004930///G protein-coupled receptor activity+++[Biological Process]---GO:0007165///signal transduction+++GO:0007186///G protein-coupled receptor signaling pathway	cellular_component+++molecular_function+++biological_process	[Cellular Component]---membrane part+++membrane+++[Molecular Function]---molecular transducer activity+++[Biological Process]---cellular process+++signaling+++biological regulation+++regulation of biological process+++response to stimulus
182608	C14C10.1	mRNA	[Cellular Component]---GO:0016021///integral component of membrane+++GO:0031305///integral component of mitochondrial inner membrane+++GO:0016020///membrane+++[Molecular Function]---GO:0005315///inorganic phosphate transmembrane transporter activity+++GO:0022857///transmembrane transporter activity+++[Biological Process]---GO:0035435///phosphate ion transmembrane transport	cellular_component+++molecular_function+++biological_process	[Cellular Component]---organelle+++cell part+++membrane part+++cell+++membrane+++organelle part+++[Molecular Function]---transporter activity+++[Biological Process]---localization
175008	gst-20	mRNA	[Cellular Component]---GO:0005737///cytoplasm+++[Molecular Function]---GO:0004364///glutathione transferase activity+++GO:0016740///transferase activity+++[Biological Process]---GO:0008340///determination of adult lifespan+++GO:0055114///oxidation-reduction process	cellular_component+++molecular_function+++biological_process	[Cellular Component]---cell part+++cell+++[Molecular Function]---catalytic activity+++[Biological Process]---developmental process+++multicellular organismal process+++metabolic process
185047	aptf-3	mRNA	[Cellular Component]---GO:0005634///nucleus+++[Molecular Function]---GO:0003713///transcription coactivator activity+++GO:0003700///DNA-binding transcription factor activity+++GO:0000977///RNA polymerase II regulatory region sequence-specific DNA binding+++GO:0000981///DNA-binding transcription factor activity, RNA polymerase II-specific+++GO:0043565///sequence-specific DNA binding+++[Biological …	cellular_component+++molecular_function+++biological_process	[Cellular Component]---organelle+++cell part+++cell+++[Molecular Function]---transcription regulator activity+++binding+++[Biological Process]---positive regulation of biological process+++cellular process+++biological regulation+++metabolic process+++regulation of biological process
177830	msp-56	mRNA	[Cellular Component]---GO:0031143///pseudopodium+++GO:0005856///cytoskeleton+++GO:0005737///cytoplasm	cellular_component	[Cellular Component]---organelle+++cell part+++cell
180397	col-19	mRNA	[Cellular Component]---GO:0060102///collagen and cuticulin-based cuticle extracellular matrix+++GO:0060111///alae of collagen and cuticulin-based cuticle extracellular matrix+++GO:0005576///extracellular region+++GO:0005581///collagen trimer+++GO:0060107///annuli extracellular matrix+++[Molecular Function]---GO:0042329///structural constituent of collagen and cuticulin-based cuticle+++GO:0042302/…	cellular_component+++molecular_function+++biological_process	[Cellular Component]---extracellular region part+++protein-containing complex+++extracellular region+++[Molecular Function]---structural molecule activity+++[Biological Process]---developmental process+++multicellular organismal process
180942	mdl-1	mRNA	[Cellular Component]---GO:0005667///transcription factor complex+++GO:0005634///nucleus+++[Molecular Function]---GO:0046983///protein dimerization activity+++GO:0043565///sequence-specific DNA binding+++GO:0046982///protein heterodimerization activity+++GO:0005515///protein binding+++[Biological Process]---GO:0045595///regulation of cell differentiation+++GO:0008340///determination of adult lifes…	cellular_component+++molecular_function+++biological_process	[Cellular Component]---protein-containing complex+++organelle+++cell part+++cell+++[Molecular Function]---binding+++[Biological Process]---developmental process+++cellular process+++multicellular organismal process+++biological regulation+++regulation of biological process
172400	acdh-5	mRNA	[Cellular Component]---GO:0005886///plasma membrane+++[Molecular Function]---GO:0016491///oxidoreductase activity+++GO:0003995///acyl-CoA dehydrogenase activity+++GO:0050660///flavin adenine dinucleotide binding+++GO:0016627///oxidoreductase activity, acting on the CH-CH group of donors+++[Biological Process]---GO:0055114///oxidation-reduction process	cellular_component+++molecular_function+++biological_process	[Cellular Component]---cell part+++cell+++membrane+++[Molecular Function]---binding+++catalytic activity+++[Biological Process]---metabolic process
183435	C44B9.3	mRNA	[Cellular Component]---GO:0016021///integral component of membrane+++GO:0016020///membrane	cellular_component	[Cellular Component]---membrane part+++membrane
188845	T24C4.4	mRNA	[Cellular Component]---GO:0016021///integral component of membrane+++GO:0016020///membrane+++[Biological Process]---GO:0045087///innate immune response	cellular_component+++biological_process	[Cellular Component]---membrane part+++membrane+++[Biological Process]---immune system process+++response to stimulus
190159	Y51H4A.25	mRNA	[Cellular Component]---GO:0016021///integral component of membrane+++GO:0016020///membrane+++[Molecular Function]---GO:0008375///acetylglucosaminyltransferase activity	cellular_component+++molecular_function	[Cellular Component]---membrane part+++membrane+++[Molecular Function]---catalytic activity
171679	hmbx-1	mRNA	[Cellular Component]---GO:0005634///nucleus+++[Molecular Function]---GO:0003691///double-stranded telomeric DNA binding+++GO:0003677///DNA binding+++GO:0005515///protein binding+++[Biological Process]---GO:0045893///positive regulation of transcription, DNA-templated	cellular_component+++molecular_function+++biological_process	[Cellular Component]---organelle+++cell part+++cell+++[Molecular Function]---binding+++[Biological Process]---positive regulation of biological process+++cellular process+++biological regulation+++metabolic process+++regulation of biological process
189848	Y43C5A.3	mRNA	[Molecular Function]---GO:0003690///double-stranded DNA binding+++[Biological Process]---GO:0098542///defense response to other organism	molecular_function+++biological_process	[Molecular Function]---binding+++[Biological Process]---multi-organism process+++response to stimulus
178120	let-653	mRNA	[Cellular Component]---GO:0098592///cytoplasmic side of apical plasma membrane+++GO:0099512///supramolecular fiber+++GO:0005615///extracellular space+++GO:0005576///extracellular region+++GO:0005886///plasma membrane+++GO:0016324///apical plasma membrane+++GO:0098591///external side of apical plasma membrane+++GO:0016020///membrane+++[Molecular Function]---GO:0042302///structural constituent of c…	cellular_component+++molecular_function+++biological_process	[Cellular Component]---extracellular region part+++supramolecular complex+++cell part+++membrane part+++extracellular region+++cell+++membrane+++[Molecular Function]---structural molecule activity+++[Biological Process]---positive regulation of biological process+++developmental process+++multicellular organismal process+++cellular process+++growth+++negative regulation of biological process+++bi…
181590	rgs-11	mRNA	[Cellular Component]---GO:0005737///cytoplasm+++GO:0005886///plasma membrane+++[Molecular Function]---GO:0005096///GTPase activator activity+++[Biological Process]---GO:0009968///negative regulation of signal transduction	cellular_component+++molecular_function+++biological_process	[Cellular Component]---cell part+++membrane+++cell+++[Molecular Function]---molecular function regulator+++[Biological Process]---cellular process+++signaling+++negative regulation of biological process+++biological regulation+++regulation of biological process+++response to stimulus
184675	F19C6.3	mRNA	[Molecular Function]---GO:0005509///calcium ion binding	molecular_function	[Molecular Function]---binding
246002	Y37F4.5	mRNA	[Cellular Component]---GO:0016021///integral component of membrane+++GO:0016020///membrane	cellular_component	[Cellular Component]---membrane part+++membrane
190573	Y70G10A.3	mRNA	[Cellular Component]---GO:0016021///integral component of membrane+++GO:0005886///plasma membrane+++GO:0005887///integral component of plasma membrane+++GO:0016020///membrane+++[Molecular Function]---GO:0005215///transporter activity+++GO:0015347///sodium-independent organic anion transmembrane transporter activity+++[Biological Process]---GO:0055085///transmembrane transport+++GO:0043252///sodiu…	cellular_component+++molecular_function+++biological_process	[Cellular Component]---cell part+++membrane part+++cell+++membrane+++[Molecular Function]---transporter activity+++[Biological Process]---localization
6418817	ZC250.5	mRNA	[Molecular Function]---GO:0003755///peptidyl-prolyl cis-trans isomerase activity+++[Biological Process]---GO:0000413///protein peptidyl-prolyl isomerization	molecular_function+++biological_process	[Molecular Function]---catalytic activity+++[Biological Process]---cellular process+++metabolic process
175805	B0244.9	mRNA	[Cellular Component]---GO:0016021///integral component of membrane+++GO:0016020///membrane	cellular_component	[Cellular Component]---membrane part+++membrane
187764	R10D12.7	mRNA	[Cellular Component]---GO:0016021///integral component of membrane+++GO:0016020///membrane	cellular_component	[Cellular Component]---membrane part+++membrane
178101	inx-8	mRNA	[Cellular Component]---GO:0016021///integral component of membrane+++GO:0005886///plasma membrane+++GO:0005921///gap junction+++GO:0030054///cell junction+++GO:0016020///membrane+++[Molecular Function]---GO:0005243///gap junction channel activity+++GO:0055077///gap junction hemi-channel activity+++[Biological Process]---GO:0055085///transmembrane transport+++GO:0006811///ion transport	cellular_component+++molecular_function+++biological_process	[Cellular Component]---cell part+++membrane part+++cell junction+++cell+++membrane+++[Molecular Function]---transporter activity+++[Biological Process]---localization
3564809	egas-4	mRNA	[Cellular Component]---GO:0016021///integral component of membrane+++GO:0016020///membrane+++[Molecular Function]---GO:0005272///sodium channel activity+++GO:0005509///calcium ion binding+++[Biological Process]---GO:0035725///sodium ion transmembrane transport+++GO:0006814///sodium ion transport+++GO:0006811///ion transport	cellular_component+++molecular_function+++biological_process	[Cellular Component]---membrane part+++membrane+++[Molecular Function]---binding+++transporter activity+++[Biological Process]---localization
24104900	grd-6	mRNA	[Cellular Component]---GO:0005764///lysosome+++GO:0009897///external side of plasma membrane+++GO:0005615///extracellular space+++[Molecular Function]---GO:0004197///cysteine-type endopeptidase activity+++GO:0008234///cysteine-type peptidase activity+++[Biological Process]---GO:0051603///proteolysis involved in cellular protein catabolic process+++GO:0000747///conjugation with cellular fusion+++G…	cellular_component+++molecular_function+++biological_process	[Cellular Component]---extracellular region part+++organelle+++cell part+++membrane part+++extracellular region+++membrane+++cell+++[Molecular Function]---catalytic activity+++[Biological Process]---reproduction+++multi-organism process+++cellular process+++metabolic process+++reproductive process
174133	B0252.1	mRNA	[Cellular Component]---GO:0016021///integral component of membrane+++GO:0005887///integral component of plasma membrane+++GO:0043235///receptor complex+++GO:0005737///cytoplasm+++GO:0016020///membrane+++[Molecular Function]---GO:0004888///transmembrane signaling receptor activity+++GO:0004714///transmembrane receptor protein tyrosine kinase activity+++GO:0004672///protein kinase activity+++GO:000…	cellular_component+++molecular_function+++biological_process	[Cellular Component]---protein-containing complex+++cell part+++membrane part+++membrane+++cell+++[Molecular Function]---binding+++catalytic activity+++molecular transducer activity+++[Biological Process]---positive regulation of biological process+++developmental process+++cellular process+++signaling+++negative regulation of biological process+++biological regulation+++metabolic process+++regul…
179561	clec-223	mRNA	[Molecular Function]---GO:0030246///carbohydrate binding	molecular_function	[Molecular Function]---binding
187826	pqn-60	mRNA	[Molecular Function]---GO:0005515///protein binding	molecular_function	[Molecular Function]---binding
259720	tsp-21	mRNA	[Cellular Component]---GO:0030659///cytoplasmic vesicle membrane+++GO:0016323///basolateral plasma membrane+++GO:0016021///integral component of membrane+++GO:0005886///plasma membrane+++GO:0005887///integral component of plasma membrane+++GO:0031410///cytoplasmic vesicle+++GO:0016020///membrane+++[Molecular Function]---GO:0005515///protein binding+++[Biological Process]---GO:0051260///protein ho…	cellular_component+++molecular_function+++biological_process	[Cellular Component]---organelle+++cell part+++membrane part+++cell+++membrane+++organelle part+++[Molecular Function]---binding+++[Biological Process]---developmental process+++positive regulation of biological process+++multicellular organismal process+++cellular process+++growth+++signaling+++biological regulation+++regulation of biological process+++cellular component organization or biogenes…
173833	C33F10.11	mRNA	[Cellular Component]---GO:0016021///integral component of membrane+++GO:0016020///membrane	cellular_component	[Cellular Component]---membrane part+++membrane
180661	nlp-1	mRNA	[Biological Process]---GO:1903745///negative regulation of pharyngeal pumping+++GO:0001966///thigmotaxis+++GO:0071244///cellular response to carbon dioxide	biological_process	[Biological Process]---cellular process+++negative regulation of biological process+++biological regulation+++regulation of biological process+++behavior+++response to stimulus+++locomotion
180164	twk-36	mRNA	[Cellular Component]---GO:0016021///integral component of membrane+++GO:0005887///integral component of plasma membrane+++GO:0016020///membrane+++[Molecular Function]---GO:0005267///potassium channel activity+++GO:0022841///potassium ion leak channel activity+++[Biological Process]---GO:0006811///ion transport+++GO:0071805///potassium ion transmembrane transport	cellular_component+++molecular_function+++biological_process	[Cellular Component]---cell part+++membrane part+++cell+++membrane+++[Molecular Function]---transporter activity+++[Biological Process]---cellular process+++localization
172964	C34B2.3	mRNA	[Cellular Component]---GO:0005737///cytoplasm+++GO:0005634///nucleus+++[Molecular Function]---GO:0004672///protein kinase activity+++GO:0005524///ATP binding+++[Biological Process]---GO:0018107///peptidyl-threonine phosphorylation+++GO:0018105///peptidyl-serine phosphorylation+++GO:0006468///protein phosphorylation	cellular_component+++molecular_function+++biological_process	[Cellular Component]---organelle+++cell+++cell part+++[Molecular Function]---binding+++catalytic activity+++[Biological Process]---cellular process+++metabolic process
180963	pes-23	mRNA	[Cellular Component]---GO:0016021///integral component of membrane+++GO:0016020///membrane+++[Molecular Function]---GO:0022857///transmembrane transporter activity+++[Biological Process]---GO:0055085///transmembrane transport	cellular_component+++molecular_function+++biological_process	[Cellular Component]---membrane part+++membrane+++[Molecular Function]---transporter activity+++[Biological Process]---localization
178007	klc-1	mRNA	[Cellular Component]---GO:0005871///kinesin complex+++[Molecular Function]---GO:0003777///microtubule motor activity+++GO:0005515///protein binding+++[Biological Process]---GO:0040038///polar body extrusion after meiotic divisions+++GO:0051295///establishment of meiotic spindle localization	cellular_component+++molecular_function+++biological_process	[Cellular Component]---protein-containing complex+++organelle+++cell part+++cell+++organelle part+++[Molecular Function]---binding+++catalytic activity+++[Biological Process]---reproduction+++multi-organism process+++cellular process+++multicellular organismal process+++reproductive process+++cellular component organization or biogenesis+++localization
184201	F08G2.5	mRNA	[Molecular Function]---GO:0005515///protein binding+++[Biological Process]---GO:0045087///innate immune response	molecular_function+++biological_process	[Molecular Function]---binding+++[Biological Process]---immune system process+++response to stimulus
174626	C06A1.3	mRNA	[Molecular Function]---GO:0004721///phosphoprotein phosphatase activity+++GO:0016787///hydrolase activity+++GO:0046872///metal ion binding+++[Biological Process]---GO:0006470///protein dephosphorylation	molecular_function+++biological_process	[Molecular Function]---binding+++catalytic activity+++[Biological Process]---cellular process+++metabolic process
174504	mex-6	mRNA	[Cellular Component]---GO:0043186///P granule+++GO:0005737///cytoplasm+++GO:0005829///cytosol+++[Molecular Function]---GO:0046872///metal ion binding+++GO:0019901///protein kinase binding+++GO:0003730///mRNA 3'-UTR binding+++GO:0003677///DNA binding+++GO:0019904///protein domain specific binding+++[Biological Process]---GO:0007275///multicellular organism development+++GO:0061158///3'-UTR-mediate…	cellular_component+++molecular_function+++biological_process	[Cellular Component]---protein-containing complex+++organelle+++cell part+++cell+++[Molecular Function]---binding+++[Biological Process]---positive regulation of biological process+++developmental process+++cellular process+++multicellular organismal process+++negative regulation of biological process+++metabolic process+++biological regulation+++regulation of biological process+++localization
182176	cyp-35A1	mRNA	[Molecular Function]---GO:0016705///oxidoreductase activity, acting on paired donors, with incorporation or reduction of molecular oxygen+++GO:0008395///steroid hydroxylase activity+++GO:0020037///heme binding+++GO:0005506///iron ion binding+++[Biological Process]---GO:0009410///response to xenobiotic stimulus	molecular_function+++biological_process	[Molecular Function]---binding+++catalytic activity+++[Biological Process]---response to stimulus
173822	C27D9.1	mRNA	[Cellular Component]---GO:0016020///membrane+++[Molecular Function]---GO:0046920///alpha-(1->3)-fucosyltransferase activity+++GO:0008417///fucosyltransferase activity+++[Biological Process]---GO:0036065///fucosylation+++GO:0006486///protein glycosylation	cellular_component+++molecular_function+++biological_process	[Cellular Component]---membrane+++[Molecular Function]---catalytic activity+++[Biological Process]---cellular process+++metabolic process
174273	perm-1	mRNA	[Cellular Component]---GO:0016021///integral component of membrane+++GO:0016020///membrane+++[Molecular Function]---GO:0016491///oxidoreductase activity+++GO:0016616///oxidoreductase activity, acting on the CH-OH group of donors, NAD or NADP as acceptor+++[Biological Process]---GO:0055114///oxidation-reduction process	cellular_component+++molecular_function+++biological_process	[Cellular Component]---membrane part+++membrane+++[Molecular Function]---catalytic activity+++[Biological Process]---metabolic process
182441	C09B9.1	mRNA	[Cellular Component]---GO:0016021///integral component of membrane+++GO:0016020///membrane	cellular_component	[Cellular Component]---membrane part+++membrane
187492	ztf-14	mRNA	[Molecular Function]---GO:0003676///nucleic acid binding	molecular_function	[Molecular Function]---binding
175358	strm-1	mRNA	[Cellular Component]---GO:0005737///cytoplasm+++[Molecular Function]---GO:0008757///S-adenosylmethionine-dependent methyltransferase activity+++GO:0008168///methyltransferase activity+++GO:0016740///transferase activity+++[Biological Process]---GO:0043414///macromolecule methylation+++GO:0032259///methylation+++GO:0006629///lipid metabolic process+++GO:0008202///steroid metabolic process+++GO:000…	cellular_component+++molecular_function+++biological_process	[Cellular Component]---cell part+++cell+++[Molecular Function]---catalytic activity+++[Biological Process]---developmental process+++multicellular organismal process+++cellular process+++biological regulation+++metabolic process+++regulation of biological process
174123	aff-1	mRNA	[Cellular Component]---GO:0016021///integral component of membrane+++GO:0005576///extracellular region+++GO:0005886///plasma membrane+++GO:0044291///cell-cell contact zone+++GO:0043229///intracellular organelle+++GO:0016324///apical plasma membrane+++GO:0016020///membrane+++[Biological Process]---GO:0046662///regulation of oviposition+++GO:0007275///multicellular organism development+++GO:0000768…	cellular_component+++biological_process	[Cellular Component]---organelle+++cell part+++membrane part+++extracellular region+++cell junction+++cell+++membrane+++[Biological Process]---reproduction+++developmental process+++multicellular organismal process+++cellular process+++biological regulation+++reproductive process+++regulation of biological process+++cellular component organization or biogenesis+++behavior
184442	F13H10.5	mRNA	[Cellular Component]---GO:0016021///integral component of membrane+++GO:0055120///striated muscle dense body+++GO:0031674///I band+++GO:0016020///membrane+++[Molecular Function]---GO:0003824///catalytic activity+++[Biological Process]---GO:0008152///metabolic process	cellular_component+++molecular_function+++biological_process	[Cellular Component]---supramolecular complex+++organelle+++cell part+++membrane part+++cell+++membrane+++organelle part+++[Molecular Function]---catalytic activity+++[Biological Process]---metabolic process
184522	far-5	mRNA	[Molecular Function]---GO:0008289///lipid binding	molecular_function	[Molecular Function]---binding
182602	nhr-155	mRNA	[Cellular Component]---GO:0005634///nucleus+++[Molecular Function]---GO:0046872///metal ion binding+++GO:0008270///zinc ion binding+++GO:0003700///DNA-binding transcription factor activity+++GO:0003677///DNA binding+++GO:0043565///sequence-specific DNA binding+++[Biological Process]---GO:0006355///regulation of transcription, DNA-templated	cellular_component+++molecular_function+++biological_process	[Cellular Component]---organelle+++cell part+++cell+++[Molecular Function]---transcription regulator activity+++binding+++[Biological Process]---cellular process+++biological regulation+++metabolic process+++regulation of biological process
173881	F09C12.8	mRNA	[Molecular Function]---GO:0016791///phosphatase activity+++[Biological Process]---GO:0016311///dephosphorylation	molecular_function+++biological_process	[Molecular Function]---catalytic activity+++[Biological Process]---cellular process+++metabolic process
178839	skr-14	mRNA	[Molecular Function]---GO:0016874///ligase activity+++[Biological Process]---GO:0006511///ubiquitin-dependent protein catabolic process	molecular_function+++biological_process	[Molecular Function]---catalytic activity+++[Biological Process]---cellular process+++metabolic process
180107	F36D3.4	mRNA	[Cellular Component]---GO:0005856///cytoskeleton	cellular_component	[Cellular Component]---organelle+++cell part+++cell
174708	sfxn-1.2	mRNA	[Cellular Component]---GO:0016021///integral component of membrane+++GO:0005739///mitochondrion+++GO:0031966///mitochondrial membrane+++GO:0016020///membrane+++[Molecular Function]---GO:0015075///ion transmembrane transporter activity+++[Biological Process]---GO:0055085///transmembrane transport+++GO:0034220///ion transmembrane transport+++GO:0006811///ion transport	cellular_component+++molecular_function+++biological_process	[Cellular Component]---organelle+++cell part+++membrane part+++membrane+++cell+++organelle part+++[Molecular Function]---transporter activity+++[Biological Process]---localization
186372	acbp-4	mRNA	[Molecular Function]---GO:0000062///fatty-acyl-CoA binding	molecular_function	[Molecular Function]---binding
174578	gpd-4	mRNA	[Cellular Component]---GO:0005737///cytoplasm+++GO:0005829///cytosol+++[Molecular Function]---GO:0004365///glyceraldehyde-3-phosphate dehydrogenase (NAD+) (phosphorylating) activity+++GO:0051287///NAD binding+++GO:0016491///oxidoreductase activity+++GO:0050661///NADP binding+++GO:0016620///oxidoreductase activity, acting on the aldehyde or oxo group of donors, NAD or NADP as acceptor+++[Biologica…	cellular_component+++molecular_function+++biological_process	[Cellular Component]---cell part+++cell+++[Molecular Function]---binding+++catalytic activity+++[Biological Process]---cellular process+++metabolic process
172213	klp-15	mRNA	[Cellular Component]---GO:0005871///kinesin complex+++GO:0005874///microtubule+++[Molecular Function]---GO:0008569///ATP-dependent microtubule motor activity, minus-end-directed+++GO:0003774///motor activity+++GO:0000166///nucleotide binding+++GO:0016887///ATPase activity+++GO:0008017///microtubule binding+++GO:0003777///microtubule motor activity+++GO:0005524///ATP binding+++[Biological Process]…	cellular_component+++molecular_function+++biological_process	[Cellular Component]---supramolecular complex+++protein-containing complex+++organelle+++cell part+++cell+++organelle part+++[Molecular Function]---binding+++catalytic activity+++[Biological Process]---cellular process
179081	lipl-6	mRNA	[Molecular Function]---GO:0016298///lipase activity+++[Biological Process]---GO:0006629///lipid metabolic process+++GO:0044255///cellular lipid metabolic process	molecular_function+++biological_process	[Molecular Function]---catalytic activity+++[Biological Process]---cellular process+++metabolic process
182351	C07A4.2	mRNA	[Cellular Component]---GO:0005615///extracellular space+++GO:0005576///extracellular region	cellular_component	[Cellular Component]---extracellular region part+++extracellular region
173938	ZK177.1	mRNA	[Cellular Component]---GO:0005575///cellular_component+++[Molecular Function]---GO:0003674///molecular_function+++[Biological Process]---GO:0008150///biological_process	cellular_component+++molecular_function+++biological_process	[Cellular Component]---cellular_component+++[Molecular Function]---molecular_function+++[Biological Process]---biological_process
183957	D2063.1	mRNA	[Cellular Component]---GO:0055120///striated muscle dense body+++GO:0005737///cytoplasm+++[Molecular Function]---GO:0046872///metal ion binding+++GO:0008270///zinc ion binding+++GO:0016491///oxidoreductase activity+++GO:0004022///alcohol dehydrogenase (NAD) activity+++GO:0005515///protein binding+++[Biological Process]---GO:0006067///ethanol metabolic process+++GO:0055114///oxidation-reduction pr…	cellular_component+++molecular_function+++biological_process	[Cellular Component]---supramolecular complex+++organelle+++cell part+++cell+++organelle part+++[Molecular Function]---binding+++catalytic activity+++[Biological Process]---cellular process+++metabolic process
187126	K07H8.5	mRNA	[Cellular Component]---GO:0016021///integral component of membrane+++GO:0016020///membrane	cellular_component	[Cellular Component]---membrane part+++membrane
3564828	flp-25	mRNA	[Biological Process]---GO:0007218///neuropeptide signaling pathway	biological_process	[Biological Process]---cellular process+++signaling+++biological regulation+++regulation of biological process+++response to stimulus
259801	msp-113	mRNA	[Cellular Component]---GO:0005856///cytoskeleton+++GO:0042995///cell projection+++GO:0031143///pseudopodium+++GO:0005737///cytoplasm	cellular_component	[Cellular Component]---organelle+++cell part+++cell
182575	ncx-8	mRNA	[Cellular Component]---GO:0016021///integral component of membrane+++GO:0016020///membrane+++[Molecular Function]---GO:0086038///calcium:sodium antiporter activity involved in regulation of cardiac muscle cell membrane potential+++[Biological Process]---GO:0055085///transmembrane transport	cellular_component+++molecular_function+++biological_process	[Cellular Component]---membrane part+++membrane+++[Molecular Function]---transporter activity+++[Biological Process]---localization
191421	ZK757.2	mRNA	[Molecular Function]---GO:0008138///protein tyrosine/serine/threonine phosphatase activity+++GO:0016787///hydrolase activity+++GO:0016791///phosphatase activity+++[Biological Process]---GO:0016311///dephosphorylation+++GO:0006470///protein dephosphorylation	molecular_function+++biological_process	[Molecular Function]---catalytic activity+++[Biological Process]---cellular process+++metabolic process
172107	F21F3.2	mRNA	[Cellular Component]---GO:0005634///nucleus+++GO:0005737///cytoplasm+++[Molecular Function]---GO:0004707///MAP kinase activity+++GO:0004672///protein kinase activity+++GO:0005524///ATP binding+++[Biological Process]---GO:0035556///intracellular signal transduction+++GO:0000165///MAPK cascade+++GO:0071310///cellular response to organic substance+++GO:0010468///regulation of gene expression+++GO:00…	cellular_component+++molecular_function+++biological_process	[Cellular Component]---organelle+++cell part+++cell+++[Molecular Function]---binding+++catalytic activity+++[Biological Process]---cellular process+++signaling+++biological regulation+++metabolic process+++regulation of biological process+++response to stimulus
179368	F58E6.5	mRNA	[Cellular Component]---GO:0005856///cytoskeleton+++GO:0005789///endoplasmic reticulum membrane	cellular_component	[Cellular Component]---organelle+++cell part+++membrane part+++cell+++membrane+++organelle part
13198891	cyp-31A5	mRNA	[Molecular Function]---GO:0016705///oxidoreductase activity, acting on paired donors, with incorporation or reduction of molecular oxygen+++GO:0020037///heme binding+++GO:0005506///iron ion binding	molecular_function	[Molecular Function]---binding+++catalytic activity
181467	jmjd-3.3	mRNA	[Cellular Component]---GO:0044666///MLL3/4 complex+++GO:0005634///nucleus+++[Molecular Function]---GO:0071558///histone demethylase activity (H3-K27 specific)+++GO:0031490///chromatin DNA binding+++GO:0000978///RNA polymerase II proximal promoter sequence-specific DNA binding+++GO:0043565///sequence-specific DNA binding+++GO:0003682///chromatin binding+++[Biological Process]---GO:0071557///histon…	cellular_component+++molecular_function+++biological_process	[Cellular Component]---protein-containing complex+++organelle+++cell part+++membrane-enclosed lumen+++cell+++organelle part+++[Molecular Function]---binding+++catalytic activity+++[Biological Process]---cellular process+++metabolic process+++cellular component organization or biogenesis
3896802	Y54G2A.45	mRNA	[Molecular Function]---GO:0016787///hydrolase activity+++[Biological Process]---GO:0006629///lipid metabolic process	molecular_function+++biological_process	[Molecular Function]---catalytic activity+++[Biological Process]---metabolic process
188639	T20D4.3	mRNA	[Cellular Component]---GO:0005634///nucleus+++GO:0005737///cytoplasm+++GO:0005829///cytosol+++[Molecular Function]---GO:0000224///peptide-N4-(N-acetyl-beta-glucosaminyl)asparagine amidase activity+++[Biological Process]---GO:0006516///glycoprotein catabolic process+++GO:0006515///protein quality control for misfolded or incompletely synthesized proteins+++GO:0006517///protein deglycosylation	cellular_component+++molecular_function+++biological_process	[Cellular Component]---organelle+++cell part+++cell+++[Molecular Function]---catalytic activity+++[Biological Process]---cellular process+++metabolic process
190486	Y65B4A.7	mRNA	[Molecular Function]---GO:0046872///metal ion binding	molecular_function	[Molecular Function]---binding
178243	K08D8.5	mRNA	[Biological Process]---GO:0045087///innate immune response	biological_process	[Biological Process]---immune system process+++response to stimulus
178315	Y38H8A.3	mRNA	[Cellular Component]---GO:0005737///cytoplasm+++GO:0005634///nucleus+++[Molecular Function]---GO:0004674///protein serine/threonine kinase activity+++GO:0000166///nucleotide binding+++GO:0004672///protein kinase activity+++GO:0005524///ATP binding+++[Biological Process]---GO:0018107///peptidyl-threonine phosphorylation+++GO:0018105///peptidyl-serine phosphorylation+++GO:0006468///protein phosphor…	cellular_component+++molecular_function+++biological_process	[Cellular Component]---organelle+++cell part+++cell+++[Molecular Function]---binding+++catalytic activity+++[Biological Process]---cellular process+++metabolic process
13190191	R13A5.15	mRNA	[Cellular Component]---GO:0016021///integral component of membrane+++GO:0016020///membrane+++[Molecular Function]---GO:0004888///transmembrane signaling receptor activity+++[Biological Process]---GO:0007606///sensory perception of chemical stimulus	cellular_component+++molecular_function+++biological_process	[Cellular Component]---membrane part+++membrane+++[Molecular Function]---molecular transducer activity+++[Biological Process]---multicellular organismal process
177950	nkb-2	mRNA	[Cellular Component]---GO:0016021///integral component of membrane+++GO:0005890///sodium:potassium-exchanging ATPase complex+++GO:0016020///membrane+++[Molecular Function]---GO:0001671///ATPase activator activity+++GO:0005391///sodium:potassium-exchanging ATPase activity+++[Biological Process]---GO:1990573///potassium ion import across plasma membrane+++GO:0006883///cellular sodium ion homeostasi…	cellular_component+++molecular_function+++biological_process	[Cellular Component]---protein-containing complex+++cell part+++membrane part+++cell+++membrane+++[Molecular Function]---transporter activity+++catalytic activity+++molecular function regulator+++[Biological Process]---cellular process+++biological regulation+++localization
173729	skr-15	mRNA	[Molecular Function]---GO:0016874///ligase activity+++[Biological Process]---GO:0006511///ubiquitin-dependent protein catabolic process	molecular_function+++biological_process	[Molecular Function]---catalytic activity+++[Biological Process]---cellular process+++metabolic process
181183	dyf-7	mRNA	[Cellular Component]---GO:0016021///integral component of membrane+++GO:0005576///extracellular region+++GO:0030425///dendrite+++GO:0005886///plasma membrane+++GO:0042995///cell projection+++GO:0032590///dendrite membrane+++GO:0016020///membrane+++[Molecular Function]---GO:0043621///protein self-association+++[Biological Process]---GO:0007399///nervous system development+++GO:0003391///amphid sen…	cellular_component+++molecular_function+++biological_process	[Cellular Component]---cell part+++membrane part+++extracellular region+++cell+++membrane+++[Molecular Function]---binding+++[Biological Process]---developmental process+++cellular process+++multicellular organismal process+++cellular component organization or biogenesis
181465	fkh-3	mRNA	[Cellular Component]---GO:0005634///nucleus+++[Molecular Function]---GO:0003700///DNA-binding transcription factor activity+++GO:0000977///RNA polymerase II regulatory region sequence-specific DNA binding+++GO:0003677///DNA binding+++GO:0043565///sequence-specific DNA binding+++[Biological Process]---GO:0006355///regulation of transcription, DNA-templated	cellular_component+++molecular_function+++biological_process	[Cellular Component]---organelle+++cell part+++cell+++[Molecular Function]---transcription regulator activity+++binding+++[Biological Process]---cellular process+++biological regulation+++metabolic process+++regulation of biological process
179187	col-43	mRNA	[Cellular Component]---GO:0016021///integral component of membrane+++GO:0005581///collagen trimer+++GO:0016020///membrane+++[Molecular Function]---GO:0042302///structural constituent of cuticle+++[Biological Process]---GO:0042338///cuticle development involved in collagen and cuticulin-based cuticle molting cycle+++GO:0040002///collagen and cuticulin-based cuticle development	cellular_component+++molecular_function+++biological_process	[Cellular Component]---protein-containing complex+++membrane part+++membrane+++[Molecular Function]---structural molecule activity+++[Biological Process]---developmental process+++multicellular organismal process
178197	smz-1	mRNA	[Cellular Component]---GO:0000790///nuclear chromatin+++GO:0000785///chromatin+++[Biological Process]---GO:0007060///male meiosis chromosome segregation	cellular_component+++biological_process	[Cellular Component]---organelle+++cell part+++membrane-enclosed lumen+++cell+++organelle part+++[Biological Process]---reproduction+++multi-organism process+++cellular process+++multicellular organismal process+++reproductive process+++cellular component organization or biogenesis
175222	C09F5.1	mRNA	[Cellular Component]---GO:0016021///integral component of membrane+++GO:0016020///membrane	cellular_component	[Cellular Component]---membrane part+++membrane
172614	F52B5.2	mRNA	[Cellular Component]---GO:0005929///cilium+++GO:0005634///nucleus+++GO:0005737///cytoplasm+++[Molecular Function]---GO:0004674///protein serine/threonine kinase activity+++GO:0004672///protein kinase activity+++GO:0005524///ATP binding+++[Biological Process]---GO:0060271///cilium assembly+++GO:0035556///intracellular signal transduction+++GO:0042073///intraciliary transport+++GO:0010468///regulat…	cellular_component+++molecular_function+++biological_process	[Cellular Component]---organelle+++cell part+++cell+++[Molecular Function]---binding+++catalytic activity+++[Biological Process]---cellular process+++signaling+++biological regulation+++metabolic process+++regulation of biological process+++cellular component organization or biogenesis+++response to stimulus+++localization
189486	Y19D10A.8	mRNA	[Cellular Component]---GO:0016021///integral component of membrane+++GO:0016020///membrane+++[Biological Process]---GO:0055085///transmembrane transport	cellular_component+++biological_process	[Cellular Component]---membrane part+++membrane+++[Biological Process]---localization
188585	best-17	mRNA	[Cellular Component]---GO:0016021///integral component of membrane+++GO:0005886///plasma membrane+++GO:0034707///chloride channel complex+++GO:0016020///membrane+++[Molecular Function]---GO:0005254///chloride channel activity+++[Biological Process]---GO:1902476///chloride transmembrane transport+++GO:0006821///chloride transport+++GO:0006811///ion transport	cellular_component+++molecular_function+++biological_process	[Cellular Component]---protein-containing complex+++cell part+++membrane part+++cell+++membrane+++[Molecular Function]---transporter activity+++[Biological Process]---localization
3564788	nlp-41	mRNA	[Biological Process]---GO:0007218///neuropeptide signaling pathway	biological_process	[Biological Process]---cellular process+++signaling+++biological regulation+++regulation of biological process+++response to stimulus
259685	F48F5.6	mRNA	[Cellular Component]---GO:0016021///integral component of membrane+++GO:0016020///membrane	cellular_component	[Cellular Component]---membrane part+++membrane
183497	C46A5.1	mRNA	[Molecular Function]---GO:0004725///protein tyrosine phosphatase activity+++GO:0016791///phosphatase activity+++[Biological Process]---GO:0016311///dephosphorylation+++GO:0035335///peptidyl-tyrosine dephosphorylation+++GO:0006470///protein dephosphorylation	molecular_function+++biological_process	[Molecular Function]---catalytic activity+++[Biological Process]---cellular process+++metabolic process
173158	car-1	mRNA	[Cellular Component]---GO:0005783///endoplasmic reticulum+++GO:1990904///ribonucleoprotein complex+++GO:1990124///messenger ribonucleoprotein complex+++GO:0051233///spindle midzone+++GO:0000932///P-body+++GO:0000242///pericentriolar material+++GO:0005819///spindle+++GO:0043186///P granule+++GO:0005737///cytoplasm+++[Molecular Function]---GO:0005515///protein binding+++[Biological Process]---GO:00…	cellular_component+++molecular_function+++biological_process	[Cellular Component]---protein-containing complex+++organelle+++cell part+++cell+++organelle part+++[Molecular Function]---binding+++[Biological Process]---developmental process+++multicellular organismal process+++cellular process+++biological regulation+++metabolic process+++regulation of biological process
172918	maph-1.2	mRNA	[Cellular Component]---GO:0005874///microtubule+++[Molecular Function]---GO:0008017///microtubule binding+++[Biological Process]---GO:0000226///microtubule cytoskeleton organization	cellular_component+++molecular_function+++biological_process	[Cellular Component]---supramolecular complex+++organelle+++cell part+++cell+++organelle part+++[Molecular Function]---binding+++[Biological Process]---cellular process+++cellular component organization or biogenesis
174533	mab-3	mRNA	[Cellular Component]---GO:0005634///nucleus+++[Molecular Function]---GO:0046872///metal ion binding+++GO:0003700///DNA-binding transcription factor activity+++GO:0001012///RNA polymerase II regulatory region DNA binding+++GO:0000978///RNA polymerase II proximal promoter sequence-specific DNA binding+++GO:0003677///DNA binding+++GO:0043565///sequence-specific DNA binding+++GO:0005515///protein bin…	cellular_component+++molecular_function+++biological_process	[Cellular Component]---organelle+++cell part+++cell+++[Molecular Function]---transcription regulator activity+++binding+++[Biological Process]---reproduction+++positive regulation of biological process+++developmental process+++multicellular organismal process+++cellular process+++negative regulation of biological process+++biological regulation+++metabolic process+++reproductive process+++regula…
177694	col-117	mRNA	[Cellular Component]---GO:0016021///integral component of membrane+++GO:0005581///collagen trimer+++GO:0016020///membrane+++[Molecular Function]---GO:0042302///structural constituent of cuticle	cellular_component+++molecular_function	[Cellular Component]---protein-containing complex+++membrane part+++membrane+++[Molecular Function]---structural molecule activity
177994	cyb-2.1	mRNA	[Cellular Component]---GO:0000307///cyclin-dependent protein kinase holoenzyme complex+++GO:0005813///centrosome+++GO:0005634///nucleus+++GO:0005737///cytoplasm+++[Molecular Function]---GO:0019901///protein kinase binding+++GO:0004672///protein kinase activity+++GO:0016538///cyclin-dependent protein serine/threonine kinase regulator activity+++[Biological Process]---GO:0000278///mitotic cell cycl…	cellular_component+++molecular_function+++biological_process	[Cellular Component]---protein-containing complex+++organelle+++cell part+++cell+++organelle part+++[Molecular Function]---binding+++catalytic activity+++molecular function regulator+++[Biological Process]---reproduction+++multi-organism process+++positive regulation of biological process+++developmental process+++multicellular organismal process+++cellular process+++biological regulation+++metab…
190893	Y105C5B.11	mRNA	[Cellular Component]---GO:0005634///nucleus+++[Molecular Function]---GO:0004842///ubiquitin-protein transferase activity+++[Biological Process]---GO:0006511///ubiquitin-dependent protein catabolic process	cellular_component+++molecular_function+++biological_process	[Cellular Component]---organelle+++cell part+++cell+++[Molecular Function]---catalytic activity+++[Biological Process]---cellular process+++metabolic process
172082	gsp-3	mRNA	[Cellular Component]---GO:0000790///nuclear chromatin+++GO:0000785///chromatin+++GO:0042995///cell projection+++GO:0031143///pseudopodium+++GO:0005694///chromosome+++GO:0005737///cytoplasm+++[Molecular Function]---GO:0046872///metal ion binding+++GO:0016787///hydrolase activity+++GO:0004721///phosphoprotein phosphatase activity+++[Biological Process]---GO:0030154///cell differentiation+++GO:00070…	cellular_component+++molecular_function+++biological_process	[Cellular Component]---organelle+++cell part+++membrane-enclosed lumen+++cell+++organelle part+++[Molecular Function]---binding+++catalytic activity+++[Biological Process]---reproduction+++multi-organism process+++developmental process+++multicellular organismal process+++cellular process+++biological regulation+++metabolic process+++reproductive process+++regulation of biological process+++cellu…
173834	C33F10.1	mRNA	[Cellular Component]---GO:0016021///integral component of membrane	cellular_component	[Cellular Component]---membrane part+++membrane
180211	ttr-26	mRNA	[Cellular Component]---GO:0005615///extracellular space	cellular_component	[Cellular Component]---extracellular region part+++extracellular region
186024	F49C12.1	mRNA	[Cellular Component]---GO:0016021///integral component of membrane+++GO:0016020///membrane	cellular_component	[Cellular Component]---membrane part+++membrane
179553	T19B10.5	mRNA	[Cellular Component]---GO:0016021///integral component of membrane+++GO:0016020///membrane	cellular_component	[Cellular Component]---membrane part+++membrane
184414	gnrr-7	mRNA	[Cellular Component]---GO:0016021///integral component of membrane+++GO:0016020///membrane+++[Molecular Function]---GO:0004930///G protein-coupled receptor activity+++[Biological Process]---GO:0007165///signal transduction+++GO:0007186///G protein-coupled receptor signaling pathway	cellular_component+++molecular_function+++biological_process	[Cellular Component]---membrane part+++membrane+++[Molecular Function]---molecular transducer activity+++[Biological Process]---cellular process+++signaling+++biological regulation+++regulation of biological process+++response to stimulus
178784	F59B1.8	mRNA	[Biological Process]---GO:0045087///innate immune response	biological_process	[Biological Process]---immune system process+++response to stimulus
183081	C31B8.12	mRNA	[Cellular Component]---GO:0016021///integral component of membrane+++GO:0016020///membrane	cellular_component	[Cellular Component]---membrane part+++membrane
182172	nhr-148	mRNA	[Cellular Component]---GO:0005634///nucleus+++[Molecular Function]---GO:0046872///metal ion binding+++GO:0008270///zinc ion binding+++GO:0003700///DNA-binding transcription factor activity+++GO:0003677///DNA binding+++GO:0043565///sequence-specific DNA binding+++[Biological Process]---GO:0006355///regulation of transcription, DNA-templated	cellular_component+++molecular_function+++biological_process	[Cellular Component]---organelle+++cell part+++cell+++[Molecular Function]---transcription regulator activity+++binding+++[Biological Process]---cellular process+++biological regulation+++metabolic process+++regulation of biological process
178327	C08F11.13	mRNA	[Cellular Component]---GO:0016021///integral component of membrane+++GO:0016020///membrane+++[Biological Process]---GO:0033692///cellular polysaccharide biosynthetic process	cellular_component+++biological_process	[Cellular Component]---membrane part+++membrane+++[Biological Process]---cellular process+++metabolic process
189116	W02D7.4	mRNA	[Cellular Component]---GO:0005737///cytoplasm+++[Molecular Function]---GO:0008080///N-acetyltransferase activity+++[Biological Process]---GO:0006807///nitrogen compound metabolic process	cellular_component+++molecular_function+++biological_process	[Cellular Component]---cell part+++cell+++[Molecular Function]---catalytic activity+++[Biological Process]---metabolic process
183860	abcx-1	mRNA	[Cellular Component]---GO:0016021///integral component of membrane+++GO:0005886///plasma membrane+++GO:0016324///apical plasma membrane+++GO:0043235///receptor complex+++GO:0016020///membrane+++[Molecular Function]---GO:0015238///drug transmembrane transporter activity+++GO:0017127///cholesterol transporter activity+++GO:0042626///ATPase activity, coupled to transmembrane movement of substances++…	cellular_component+++molecular_function+++biological_process	[Cellular Component]---protein-containing complex+++cell part+++membrane part+++cell+++membrane+++[Molecular Function]---transporter activity+++catalytic activity+++[Biological Process]---response to stimulus+++localization
189309	W09C3.1	mRNA	[Cellular Component]---GO:0005737///cytoplasm+++GO:0005634///nucleus+++[Molecular Function]---GO:0004672///protein kinase activity+++GO:0005524///ATP binding+++[Biological Process]---GO:0018107///peptidyl-threonine phosphorylation+++GO:0018105///peptidyl-serine phosphorylation+++GO:0006468///protein phosphorylation	cellular_component+++molecular_function+++biological_process	[Cellular Component]---organelle+++cell part+++cell+++[Molecular Function]---binding+++catalytic activity+++[Biological Process]---cellular process+++metabolic process
183642	C50C3.5	mRNA	[Cellular Component]---GO:0005575///cellular_component+++[Molecular Function]---GO:0046872///metal ion binding+++GO:0003674///molecular_function+++GO:0005509///calcium ion binding+++[Biological Process]---GO:0008150///biological_process	cellular_component+++molecular_function+++biological_process	[Cellular Component]---cellular_component+++[Molecular Function]---binding+++molecular_function+++[Biological Process]---biological_process
178187	thn-2	mRNA	[Cellular Component]---GO:0005576///extracellular region+++[Molecular Function]---GO:0003674///molecular_function+++[Biological Process]---GO:0050830///defense response to Gram-positive bacterium	cellular_component+++molecular_function+++biological_process	[Cellular Component]---extracellular region+++[Molecular Function]---molecular_function+++[Biological Process]---multi-organism process+++response to stimulus
177274	msp-57	mRNA	[Cellular Component]---GO:0031143///pseudopodium+++GO:0005856///cytoskeleton+++GO:0005737///cytoplasm	cellular_component	[Cellular Component]---organelle+++cell part+++cell
189239	W06D4.3	mRNA	[Cellular Component]---GO:0005737///cytoplasm	cellular_component	[Cellular Component]---cell part+++cell
176663	pph-4.2	mRNA	[Molecular Function]---GO:0046872///metal ion binding+++GO:0016787///hydrolase activity+++GO:0004721///phosphoprotein phosphatase activity+++[Biological Process]---GO:0006470///protein dephosphorylation	molecular_function+++biological_process	[Molecular Function]---binding+++catalytic activity+++[Biological Process]---cellular process+++metabolic process
185281	clec-137	mRNA	[Molecular Function]---GO:0030246///carbohydrate binding	molecular_function	[Molecular Function]---binding
172819	C04F12.7	mRNA	[Cellular Component]---GO:0016021///integral component of membrane+++GO:0016020///membrane	cellular_component	[Cellular Component]---membrane part+++membrane
180578	F53B3.5	mRNA	[Cellular Component]---GO:0016021///integral component of membrane+++GO:0016020///membrane	cellular_component	[Cellular Component]---membrane part+++membrane
191686	ins-5	mRNA	[Cellular Component]---GO:0005576///extracellular region+++[Molecular Function]---GO:0005179///hormone activity+++[Biological Process]---GO:0010469///regulation of signaling receptor activity+++GO:0040024///dauer larval development	cellular_component+++molecular_function+++biological_process	[Cellular Component]---extracellular region+++[Molecular Function]---binding+++molecular function regulator+++[Biological Process]---developmental process+++multicellular organismal process+++cellular process+++signaling+++biological regulation+++regulation of biological process+++response to stimulus
177870	cwn-2	mRNA	[Cellular Component]---GO:0005615///extracellular space+++GO:0005576///extracellular region+++[Molecular Function]---GO:0048018///receptor ligand activity+++GO:0005102///signaling receptor binding+++GO:0005109///frizzled binding+++[Biological Process]---GO:0010084///specification of animal organ axis polarity+++GO:0045165///cell fate commitment+++GO:0030182///neuron differentiation+++GO:0033564//…	cellular_component+++molecular_function+++biological_process	[Cellular Component]---extracellular region part+++extracellular region+++[Molecular Function]---binding+++molecular function regulator+++[Biological Process]---positive regulation of biological process+++developmental process+++cellular process+++multicellular organismal process+++signaling+++biological regulation+++regulation of biological process+++cellular component organization or biogenesis…
178210	let-99	mRNA	[Cellular Component]---GO:0005938///cell cortex+++GO:0005737///cytoplasm+++[Molecular Function]---GO:0003674///molecular_function+++GO:0005515///protein binding+++[Biological Process]---GO:0035556///intracellular signal transduction+++GO:0000132///establishment of mitotic spindle orientation+++GO:0007275///multicellular organism development+++GO:0007049///cell cycle+++GO:0051301///cell division	cellular_component+++molecular_function+++biological_process	[Cellular Component]---cell part+++cell+++[Molecular Function]---binding+++molecular_function+++[Biological Process]---developmental process+++multicellular organismal process+++cellular process+++signaling+++biological regulation+++regulation of biological process+++cellular component organization or biogenesis+++response to stimulus+++localization
187968	dma-1	mRNA	[Cellular Component]---GO:0016021///integral component of membrane+++GO:0005886///plasma membrane+++GO:0032590///dendrite membrane+++GO:0016020///membrane+++[Molecular Function]---GO:0002020///protease binding+++[Biological Process]---GO:0070593///dendrite self-avoidance+++GO:0070983///dendrite guidance+++GO:0050775///positive regulation of dendrite morphogenesis+++GO:1903859///regulation of dend…	cellular_component+++molecular_function+++biological_process	[Cellular Component]---cell part+++membrane part+++cell+++membrane+++[Molecular Function]---binding+++[Biological Process]---positive regulation of biological process+++developmental process+++cellular process+++multicellular organismal process+++growth+++biological regulation+++regulation of biological process+++cellular component organization or biogenesis+++response to stimulus+++locomotion
187144	K08D8.4	mRNA	[Biological Process]---GO:0045087///innate immune response	biological_process	[Biological Process]---immune system process+++response to stimulus
4363051	B0280.17	mRNA	[Molecular Function]---GO:0003723///RNA binding+++GO:0003676///nucleic acid binding	molecular_function	[Molecular Function]---binding
353440	F08F3.10	mRNA	[Cellular Component]---GO:0016021///integral component of membrane+++GO:0016020///membrane	cellular_component	[Cellular Component]---membrane part+++membrane
259632	C37C3.12	mRNA	[Cellular Component]---GO:0016021///integral component of membrane+++GO:0005634///nucleus+++GO:0005737///cytoplasm+++GO:0016020///membrane+++[Biological Process]---GO:0006606///protein import into nucleus	cellular_component+++biological_process	[Cellular Component]---organelle+++cell part+++membrane part+++membrane+++cell+++[Biological Process]---localization
180115	nhr-112	mRNA	[Cellular Component]---GO:0005634///nucleus+++[Molecular Function]---GO:0046872///metal ion binding+++GO:0008270///zinc ion binding+++GO:0003700///DNA-binding transcription factor activity+++GO:0003677///DNA binding+++GO:0043565///sequence-specific DNA binding+++[Biological Process]---GO:0006355///regulation of transcription, DNA-templated+++GO:0045087///innate immune response	cellular_component+++molecular_function+++biological_process	[Cellular Component]---organelle+++cell part+++cell+++[Molecular Function]---transcription regulator activity+++binding+++[Biological Process]---cellular process+++biological regulation+++metabolic process+++immune system process+++regulation of biological process+++response to stimulus
24104374	D2062.1	mRNA	[Cellular Component]---GO:0005615///extracellular space+++GO:0005576///extracellular region	cellular_component	[Cellular Component]---extracellular region part+++extracellular region
190738	clp-6	mRNA	[Cellular Component]---GO:0005737///cytoplasm+++[Molecular Function]---GO:0008233///peptidase activity+++GO:0016787///hydrolase activity+++GO:0008234///cysteine-type peptidase activity+++GO:0004198///calcium-dependent cysteine-type endopeptidase activity+++[Biological Process]---GO:0006508///proteolysis	cellular_component+++molecular_function+++biological_process	[Cellular Component]---cell part+++cell+++[Molecular Function]---catalytic activity+++[Biological Process]---metabolic process
171929	inx-22	mRNA	[Cellular Component]---GO:0016021///integral component of membrane+++GO:0005886///plasma membrane+++GO:0005921///gap junction+++GO:0030054///cell junction+++GO:0016020///membrane+++[Molecular Function]---GO:0005243///gap junction channel activity+++[Biological Process]---GO:0055085///transmembrane transport+++GO:1900194///negative regulation of oocyte maturation+++GO:0006811///ion transport	cellular_component+++molecular_function+++biological_process	[Cellular Component]---cell part+++membrane part+++cell junction+++cell+++membrane+++[Molecular Function]---transporter activity+++[Biological Process]---reproduction+++multi-organism process+++developmental process+++multicellular organismal process+++cellular process+++negative regulation of biological process+++biological regulation+++reproductive process+++regulation of biological process+++l…
174642	M28.9	mRNA	[Cellular Component]---GO:0016021///integral component of membrane+++GO:0016020///membrane	cellular_component	[Cellular Component]---membrane part+++membrane
190218	Y53F4B.19	mRNA	[Cellular Component]---GO:0005856///cytoskeleton	cellular_component	[Cellular Component]---organelle+++cell part+++cell
176750	klp-19	mRNA	[Cellular Component]---GO:0000794///condensed nuclear chromosome+++GO:0005871///kinesin complex+++GO:0005819///spindle+++GO:0005694///chromosome+++GO:0005874///microtubule+++GO:0005654///nucleoplasm+++[Molecular Function]---GO:0003774///motor activity+++GO:0000166///nucleotide binding+++GO:0016887///ATPase activity+++GO:0008017///microtubule binding+++GO:0003777///microtubule motor activity+++GO:…	cellular_component+++molecular_function+++biological_process	[Cellular Component]---supramolecular complex+++protein-containing complex+++organelle+++cell part+++membrane-enclosed lumen+++cell+++organelle part+++[Molecular Function]---binding+++catalytic activity+++[Biological Process]---reproduction+++cellular process+++reproductive process+++cellular component organization or biogenesis
187071	K06H6.2	mRNA	[Cellular Component]---GO:0016021///integral component of membrane+++GO:0016020///membrane	cellular_component	[Cellular Component]---membrane part+++membrane
181296	lpr-6	mRNA	[Cellular Component]---GO:0016021///integral component of membrane+++GO:0005576///extracellular region+++GO:0016020///membrane+++[Biological Process]---GO:0006869///lipid transport+++GO:0006629///lipid metabolic process+++GO:0000302///response to reactive oxygen species	cellular_component+++biological_process	[Cellular Component]---membrane part+++extracellular region+++membrane+++[Biological Process]---metabolic process+++response to stimulus+++localization
189654	clec-4	mRNA	[Molecular Function]---GO:0030246///carbohydrate binding	molecular_function	[Molecular Function]---binding
177359	H04M03.3	mRNA	[Molecular Function]---GO:0016491///oxidoreductase activity+++[Biological Process]---GO:0055114///oxidation-reduction process	molecular_function+++biological_process	[Molecular Function]---catalytic activity+++[Biological Process]---metabolic process
173839	col-17	mRNA	[Cellular Component]---GO:0005581///collagen trimer+++[Molecular Function]---GO:0042302///structural constituent of cuticle+++[Biological Process]---GO:0040002///collagen and cuticulin-based cuticle development	cellular_component+++molecular_function+++biological_process	[Cellular Component]---protein-containing complex+++[Molecular Function]---structural molecule activity+++[Biological Process]---developmental process+++multicellular organismal process
180593	rsef-1	mRNA	[Cellular Component]---GO:0048471///perinuclear region of cytoplasm+++GO:0005737///cytoplasm+++[Molecular Function]---GO:0046872///metal ion binding+++GO:0000166///nucleotide binding+++GO:0003924///GTPase activity+++GO:0005525///GTP binding+++GO:0005509///calcium ion binding+++[Biological Process]---GO:0006886///intracellular protein transport+++GO:0032482///Rab protein signal transduction	cellular_component+++molecular_function+++biological_process	[Cellular Component]---cell part+++cell+++[Molecular Function]---binding+++catalytic activity+++[Biological Process]---cellular process+++signaling+++biological regulation+++regulation of biological process+++response to stimulus+++localization
179785	far-3	mRNA	[Molecular Function]---GO:0008289///lipid binding	molecular_function	[Molecular Function]---binding
179464	ugt-33	mRNA	[Cellular Component]---GO:0016021///integral component of membrane+++GO:0043231///intracellular membrane-bounded organelle+++GO:0016020///membrane+++[Molecular Function]---GO:0008194///UDP-glycosyltransferase activity+++GO:0016740///transferase activity+++GO:0016758///transferase activity, transferring hexosyl groups+++[Biological Process]---GO:0008152///metabolic process	cellular_component+++molecular_function+++biological_process	[Cellular Component]---organelle+++cell part+++membrane part+++cell+++membrane+++[Molecular Function]---catalytic activity+++[Biological Process]---metabolic process
174686	col-81	mRNA	[Cellular Component]---GO:0016021///integral component of membrane+++GO:0005581///collagen trimer+++GO:0016020///membrane+++[Molecular Function]---GO:0042302///structural constituent of cuticle	cellular_component+++molecular_function	[Cellular Component]---protein-containing complex+++membrane part+++membrane+++[Molecular Function]---structural molecule activity
178595	nas-32	mRNA	[Cellular Component]---GO:0005576///extracellular region+++[Molecular Function]---GO:0046872///metal ion binding+++GO:0008270///zinc ion binding+++GO:0004222///metalloendopeptidase activity+++GO:0008237///metallopeptidase activity+++GO:0008233///peptidase activity+++GO:0016787///hydrolase activity+++[Biological Process]---GO:0006508///proteolysis+++GO:0018996///molting cycle, collagen and cuticul…	cellular_component+++molecular_function+++biological_process	[Cellular Component]---extracellular region+++[Molecular Function]---binding+++catalytic activity+++[Biological Process]---multicellular organismal process+++metabolic process
177464	cht-3	mRNA	[Cellular Component]---GO:0005576///extracellular region+++[Molecular Function]---GO:0016787///hydrolase activity+++GO:0016798///hydrolase activity, acting on glycosyl bonds+++GO:0008061///chitin binding+++[Biological Process]---GO:0008152///metabolic process+++GO:0000272///polysaccharide catabolic process+++GO:0005975///carbohydrate metabolic process+++GO:0006032///chitin catabolic process	cellular_component+++molecular_function+++biological_process	[Cellular Component]---extracellular region+++[Molecular Function]---binding+++catalytic activity+++[Biological Process]---cellular process+++metabolic process
179763	anp-1	mRNA	[Cellular Component]---GO:0016021///integral component of membrane+++GO:0005737///cytoplasm+++GO:0016020///membrane+++[Molecular Function]---GO:0046872///metal ion binding+++GO:0008270///zinc ion binding+++GO:0070006///metalloaminopeptidase activity+++GO:0008237///metallopeptidase activity+++GO:0008233///peptidase activity+++GO:0016787///hydrolase activity+++GO:0004177///aminopeptidase activity++…	cellular_component+++molecular_function+++biological_process	[Cellular Component]---cell part+++membrane part+++membrane+++cell+++[Molecular Function]---binding+++catalytic activity+++[Biological Process]---cellular process+++metabolic process
188938	srd-27	mRNA	[Cellular Component]---GO:0016021///integral component of membrane+++GO:0016020///membrane+++[Biological Process]---GO:0007614///short-term memory	cellular_component+++biological_process	[Cellular Component]---membrane part+++membrane+++[Biological Process]---multicellular organismal process+++behavior
185428	comp-1	mRNA	[Molecular Function]---GO:0004672///protein kinase activity+++GO:0005524///ATP binding+++[Biological Process]---GO:0006468///protein phosphorylation	molecular_function+++biological_process	[Molecular Function]---binding+++catalytic activity+++[Biological Process]---cellular process+++metabolic process
179570	npr-25	mRNA	[Cellular Component]---GO:0016021///integral component of membrane+++GO:0016020///membrane+++[Molecular Function]---GO:0004930///G protein-coupled receptor activity+++[Biological Process]---GO:0007165///signal transduction+++GO:0007186///G protein-coupled receptor signaling pathway	cellular_component+++molecular_function+++biological_process	[Cellular Component]---membrane part+++membrane+++[Molecular Function]---molecular transducer activity+++[Biological Process]---cellular process+++signaling+++biological regulation+++regulation of biological process+++response to stimulus
173830	msp-40	mRNA	[Cellular Component]---GO:0031143///pseudopodium+++GO:0005856///cytoskeleton+++GO:0005737///cytoplasm	cellular_component	[Cellular Component]---organelle+++cell part+++cell
177748	col-120	mRNA	[Cellular Component]---GO:0005615///extracellular space+++GO:0016021///integral component of membrane+++GO:0005581///collagen trimer+++GO:0031012///extracellular matrix+++GO:0016020///membrane+++[Molecular Function]---GO:0005201///extracellular matrix structural constituent+++GO:0042302///structural constituent of cuticle+++[Biological Process]---GO:0030198///extracellular matrix organization+++G…	cellular_component+++molecular_function+++biological_process	[Cellular Component]---extracellular region part+++protein-containing complex+++membrane part+++extracellular region+++membrane+++[Molecular Function]---structural molecule activity+++[Biological Process]---developmental process+++multicellular organismal process+++cellular process+++cellular component organization or biogenesis
179405	R04B5.5	mRNA	[Cellular Component]---GO:0070062///extracellular exosome+++GO:0031514///motile cilium+++GO:0031966///mitochondrial membrane+++[Molecular Function]---GO:0046872///metal ion binding+++GO:0008270///zinc ion binding+++GO:0016491///oxidoreductase activity+++[Biological Process]---GO:0055114///oxidation-reduction process	cellular_component+++molecular_function+++biological_process	[Cellular Component]---extracellular region part+++organelle+++cell part+++extracellular region+++membrane+++cell+++organelle part+++[Molecular Function]---binding+++catalytic activity+++[Biological Process]---metabolic process
173981	msp-142	mRNA	[Cellular Component]---GO:0031143///pseudopodium+++GO:0005737///cytoplasm+++GO:0005856///cytoskeleton	cellular_component	[Cellular Component]---organelle+++cell part+++cell
186667	H02F09.3	mRNA	[Cellular Component]---GO:0016021///integral component of membrane+++GO:0016020///membrane	cellular_component	[Cellular Component]---membrane part+++membrane
189951	Y46D2A.1	mRNA	[Cellular Component]---GO:0045121///membrane raft+++[Biological Process]---GO:0045087///innate immune response	cellular_component+++biological_process	[Cellular Component]---membrane part+++membrane+++[Biological Process]---immune system process+++response to stimulus
260235	Y47D7A.15	mRNA	[Cellular Component]---GO:0005576///extracellular region	cellular_component	[Cellular Component]---extracellular region
192053	taf-7.1	mRNA	[Cellular Component]---GO:0005669///transcription factor TFIID complex+++[Molecular Function]---GO:0003713///transcription coactivator activity+++GO:0044212///transcription regulatory region DNA binding+++GO:0035034///histone acetyltransferase regulator activity+++GO:0008134///transcription factor binding+++GO:0035035///histone acetyltransferase binding+++[Biological Process]---GO:0006367///trans…	cellular_component+++molecular_function+++biological_process	[Cellular Component]---protein-containing complex+++organelle+++cell part+++membrane-enclosed lumen+++cell+++organelle part+++[Molecular Function]---binding+++transcription regulator activity+++molecular function regulator+++[Biological Process]---positive regulation of biological process+++cellular process+++biological regulation+++metabolic process+++regulation of biological process+++cellular …
187292	srr-4	mRNA	[Cellular Component]---GO:0016021///integral component of membrane+++GO:0016020///membrane+++[Biological Process]---GO:0008340///determination of adult lifespan	cellular_component+++biological_process	[Cellular Component]---membrane part+++membrane+++[Biological Process]---developmental process+++multicellular organismal process
184406	F13A7.11	mRNA	[Biological Process]---GO:0045087///innate immune response	biological_process	[Biological Process]---immune system process+++response to stimulus
190739	Y79H2A.2	mRNA	[Cellular Component]---GO:0016021///integral component of membrane+++GO:0016020///membrane	cellular_component	[Cellular Component]---membrane part+++membrane
188416	T11F8.1	mRNA	[Cellular Component]---GO:0016021///integral component of membrane+++GO:0016020///membrane	cellular_component	[Cellular Component]---membrane part+++membrane
182846	C24D10.5	mRNA	[Cellular Component]---GO:0016021///integral component of membrane+++GO:0016020///membrane	cellular_component	[Cellular Component]---membrane part+++membrane
176811	mlc-7	mRNA	[Molecular Function]---GO:0005509///calcium ion binding	molecular_function	[Molecular Function]---binding
178801	C17E7.4	mRNA	[Molecular Function]---GO:0005515///protein binding	molecular_function	[Molecular Function]---binding
180038	dhs-23	mRNA	[Molecular Function]---GO:0016491///oxidoreductase activity+++[Biological Process]---GO:0055114///oxidation-reduction process	molecular_function+++biological_process	[Molecular Function]---catalytic activity+++[Biological Process]---metabolic process
177180	scrm-5	mRNA	[Cellular Component]---GO:0016020///membrane+++[Molecular Function]---GO:0017128///phospholipid scramblase activity+++GO:0005515///protein binding+++[Biological Process]---GO:0017121///phospholipid scrambling	cellular_component+++molecular_function+++biological_process	[Cellular Component]---membrane+++[Molecular Function]---transporter activity+++binding+++[Biological Process]---cellular process+++biological regulation+++cellular component organization or biogenesis
[truncated: 593 more rows]

## Sheet: KEGG_Enrichment 
Gene ID	Gene Symbol	Type	KEGG Pathway Term	KEGG Pathway Term Level1	KEGG Pathway Term Level2
[truncated: 187 more rows]
