# Supplementary material for: O-GlcNAc signaling increases neuron regeneration through one-carbon metabolism in Caenorhabditis elegans
Source: eLife. 2024 Feb 9;13:e86478. doi: 10.7554/eLife.86478 (PMC10857789; doi:10.7554/eLife.86478)
Supplement: Figure 2—source data 2. [file elife-86478-fig2-data2.xlsx]

## Sheet: WT-vs-OGT-1_DEGs
							ogt-1 KO vs WT
Ensembl Gene ID	Nematode Entrez Gene ID(s)	Human Entrez Gene ID(s)	Symbol	Description	Biotype	GO Term(s)	fold change	Wald statistic	p	FDR q (all)
WBGene00021768	171761		Y51F10.7		protein_coding		-7.75574	-10.0588	8.40192e-24	1.94135e-19
WBGene00002102	3565612		ins-19	INSulin related	protein_coding	GO:0005576 (extracellular region); GO:0005179 (hormone activity); GO:0007165 (signal transduction)	-56.3397	-9.75203	1.80814e-22	2.08895e-18
WBGene00000213	176879		asm-3	Putative sphingomyelin phosphodiesterase asm-3	protein_coding	GO:0006685 (sphingomyelin catabolic process); GO:0004767 (sphingomyelin phosphodiesterase activity); GO:0016787 (hydrolase activity); GO:0008152 (metabolic process); GO:0016798 (hydrolase activity, acting on glycosyl bonds); GO:0046872 (metal ion binding); GO:0005576 (extracellular region)	-6.73722	-8.25524	1.516e-16	1.16762e-12
WBGene00011450	188071		ttr-22	TransThyretin-Related family domain	protein_coding	GO:0005576 (extracellular region); GO:0009986 (cell surface)	7.43402	7.85387	4.03398e-15	2.33023e-11
WBGene00022642	178563	3988	lipl-5	Lipase	protein_coding	GO:0016787 (hydrolase activity); GO:0005576 (extracellular region); GO:0006629 (lipid metabolic process); GO:0016042 (lipid catabolic process); GO:0016788 (hydrolase activity, acting on ester bonds); GO:0005764 (lysosome); GO:0043202 (lysosomal lumen); GO:0019433 (triglyceride catabolic process); GO:0050829 (defense response to Gram-negative bacterium); GO:0055088 (lipid homeostasis)	-5.53094	-7.51196	5.82474e-14	2.69173e-10
WBGene00009215	178187		thn-2	THaumatiN family	protein_coding	GO:0050830 (defense response to Gram-positive bacterium); GO:0050829 (defense response to Gram-negative bacterium); GO:0005576 (extracellular region); GO:0003674 (molecular_function)	-4.38971	-7.44853	9.43871e-14	3.63485e-10
WBGene00004008	181416		pgp-14	p-GlycoProtein related; p-glycoprotein related (146.8 kD) (Pgp-14)	protein_coding	GO:0016020 (membrane); GO:0016021 (integral component of membrane); GO:0005524 (ATP binding); GO:0042626 (ATPase-coupled transmembrane transporter activity); GO:0000166 (nucleotide binding); GO:0055085 (transmembrane transport); GO:0093002 (response to nematicide); GO:0016887 (ATPase activity)	3.80928	7.18859	6.54662e-13	2.16095e-09
WBGene00016052	178737		dod-3	Downstream Of DAF-16 (Regulated by DAF-16)	protein_coding	GO:0016020 (membrane); GO:0016021 (integral component of membrane)	-4.59403	-7.15777	8.20013e-13	2.3684e-09
WBGene00013515	177722		Y73F4A.2	DOMON domain-containing protein Y73F4A.2	protein_coding	GO:0005576 (extracellular region)	3.74945	7.09627	1.28171e-12	3.29057e-09
WBGene00008245	3565989		fipr-10	FIP (Fungus-Induced Protein) Related	protein_coding		7.21378	6.89845	5.25742e-12	1.21478e-08
WBGene00013939	191245		ZK218.5		protein_coding		255.933	6.83123	8.41903e-12	1.76846e-08
WBGene00013949	180197		ZK262.2		protein_coding	GO:0006629 (lipid metabolic process)	4.46581	6.80116	1.0378e-11	1.99828e-08
WBGene00015102	175991		cpg-2	Chondroitin proteoglycan-2	protein_coding	GO:0008061 (chitin binding); GO:0005576 (extracellular region)	-5.0898	-6.72876	1.71111e-11	3.0413e-08
WBGene00006980	192088		zig-3	Zwei Ig domain protein zig-3	protein_coding	GO:0005886 (plasma membrane); GO:0007155 (cell adhesion); GO:0005576 (extracellular region); GO:0007156 (homophilic cell adhesion via plasma membrane adhesion molecules); GO:0007411 (axon guidance); GO:0030424 (axon); GO:0070593 (dendrite self-avoidance); GO:0098632 (cell-cell adhesion mediator activity); GO:0005515 (protein binding)	3.70805	6.67535	2.4664e-11	4.07062e-08
WBGene00004241	174373		puf-5	Pumilio domain-containing protein 5	protein_coding	GO:0003723 (RNA binding)	-4.69693	-6.63233	3.3042e-11	5.08979e-08
WBGene00022246	190656		acp-7	ACid Phosphatase family	protein_coding	GO:0016311 (dephosphorylation); GO:0016791 (phosphatase activity)	4.11841	6.58025	4.69647e-11	6.38334e-08
WBGene00014053	191388		ZK669.3	GILT-like protein ZK669.3	protein_coding	GO:0005576 (extracellular region); GO:0016491 (oxidoreductase activity)	3.7988	6.58477	4.5559e-11	6.38334e-08
WBGene00018492	179044		hpo-26		protein_coding		4.99145	6.48079	9.1246e-11	1.17129e-07
WBGene00000715	188514		col-142	COLlagen	protein_coding	GO:0016020 (membrane); GO:0016021 (integral component of membrane); GO:0042302 (structural constituent of cuticle)	3.17027	6.45316	1.09539e-10	1.33211e-07
WBGene00001606	178505		gln-5	GLutamiNe synthetase (Glutamate-ammonia ligase)	protein_coding	GO:0005737 (cytoplasm); GO:0003824 (catalytic activity); GO:0006807 (nitrogen compound metabolic process); GO:0004356 (glutamate-ammonia ligase activity); GO:0006542 (glutamine biosynthetic process)	-4.00675	-6.43428	1.24059e-10	1.36501e-07
WBGene00004374	177329		rme-2	Receptor Mediated Endocytosis	protein_coding	GO:0016020 (membrane); GO:0016021 (integral component of membrane); GO:0005509 (calcium ion binding); GO:0005886 (plasma membrane); GO:0006897 (endocytosis); GO:0009792 (embryo development ending in birth or egg hatching); GO:0031410 (cytoplasmic vesicle); GO:0005887 (integral component of plasma membrane); GO:0030728 (ovulation); GO:0010008 (endosome membrane); GO:0048599 (oocyte development); G…	-5.80534	-6.43965	1.19751e-10	1.36501e-07
WBGene00013013	175003		clec-145	C-type LECtin	protein_coding	GO:0030246 (carbohydrate binding)	-3.11338	-6.41586	1.40034e-10	1.47074e-07
WBGene00004239	178320		puf-3	PUF (Pumilio/FBF) domain-containing	protein_coding	GO:0005634 (nucleus); GO:0005737 (cytoplasm); GO:0003723 (RNA binding); GO:0003730 (mRNA 3'-UTR binding); GO:0003729 (mRNA binding); GO:0005515 (protein binding); GO:0010608 (posttranscriptional regulation of gene expression)	-4.31594	-6.376	1.8177e-10	1.82607e-07
WBGene00009386	179593		tag-290		protein_coding	GO:0004867 (serine-type endopeptidase inhibitor activity); GO:0010951 (negative regulation of endopeptidase activity)	3.88908	6.3645	1.9593e-10	1.88632e-07
WBGene00011986	172854		T24D1.3		protein_coding	GO:0046872 (metal ion binding)	-5.1643	-6.35814	2.04208e-10	1.88737e-07
WBGene00000705	178254		col-131	COLlagen	protein_coding	GO:0016020 (membrane); GO:0016021 (integral component of membrane); GO:0005581 (collagen trimer)	19.5228	6.33177	2.42359e-10	1.9433e-07
WBGene00019811	187510		egg-2	LDL receptor repeat-containing protein egg-2	protein_coding	GO:0005515 (protein binding)	-4.72823	-6.33231	2.41513e-10	1.9433e-07
WBGene00009035	178067	9945	gfat-2	Glutamine-Fructose 6-phosphate AminoTransferase homolog	protein_coding	GO:0016740 (transferase activity); GO:0006487 (protein N-linked glycosylation); GO:0006002 (fructose 6-phosphate metabolic process); GO:0006541 (glutamine metabolic process); GO:0004360 (glutamine-fructose-6-phosphate transaminase (isomerizing) activity); GO:0006047 (UDP-N-acetylglucosamine metabolic process); GO:0097367 (carbohydrate derivative binding); GO:1901135 (carbohydrate derivative metab…	-5.4481	-6.34409	2.23745e-10	1.9433e-07
WBGene00019368	176959		K03H6.2		protein_coding	GO:0006629 (lipid metabolic process)	-3.48886	-6.3308	2.43901e-10	1.9433e-07
WBGene00010351	178061		cbd-1	Chitin-binding domain protein cbd-1	protein_coding	GO:0008061 (chitin binding); GO:0005576 (extracellular region)	-5.48405	-6.31551	2.69277e-10	2.07397e-07
WBGene00000745	180934		col-172	COLlagen	protein_coding	GO:0016020 (membrane); GO:0016021 (integral component of membrane); GO:0042302 (structural constituent of cuticle)	8.5167	6.27012	3.60779e-10	2.60505e-07
WBGene00045417	6418794		Y37H2A.13		protein_coding		-7.44675	-6.2743	3.51204e-10	2.60505e-07
WBGene00011063	172465		cpg-3	Chondroitin proteoglycan 3	protein_coding		-4.79707	-6.25955	3.86079e-10	2.63781e-07
WBGene00021035	171908		W05F2.3		protein_coding	GO:0016020 (membrane); GO:0016021 (integral component of membrane)	-3.96499	-6.25872	3.88148e-10	2.63781e-07
WBGene00000465	175586		cpg-1	Chondroitin proteoglycan 1	protein_coding	GO:0008061 (chitin binding); GO:0005576 (extracellular region)	-5.19171	-6.24449	4.25192e-10	2.807e-07
WBGene00022505	191053		ZC21.3		protein_coding		3.5619	6.22997	4.66537e-10	2.99439e-07
WBGene00004798	176471		sip-1	Stress-induced protein 1	protein_coding	GO:0009792 (embryo development ending in birth or egg hatching); GO:0008340 (determination of adult lifespan); GO:0005829 (cytosol); GO:0009408 (response to heat); GO:0051082 (unfolded protein binding); GO:0019538 (protein metabolic process)	-3.02454	-6.22131	4.93031e-10	3.07891e-07
WBGene00077757	7040175		E02H4.7		protein_coding		-10.2514	-6.20796	5.36755e-10	3.26375e-07
WBGene00000714	188515		col-141	COLlagen	protein_coding	GO:0016020 (membrane); GO:0016021 (integral component of membrane); GO:0042302 (structural constituent of cuticle)	5.63698	6.18382	6.25702e-10	3.70705e-07
WBGene00004993	177652		spp-8	SaPosin-like Protein family	protein_coding	GO:0005615 (extracellular space)	-3.27989	-6.1669	6.96399e-10	4.02275e-07
WBGene00003026	172760	131405	lin-41		protein_coding	GO:0005515 (protein binding); GO:0008270 (zinc ion binding)	-3.72268	-6.13869	8.32047e-10	4.68909e-07
WBGene00000496	172508		chs-1	Chitin synthase chs-1	protein_coding	GO:0016758 (transferase activity, transferring hexosyl groups); GO:0004100 (chitin synthase activity)	-5.11801	-6.11641	9.57053e-10	5.14272e-07
WBGene00019978	178638		hacd-1	Hydroxy-Acyl-CoA Dehydrogenase	protein_coding	GO:0016020 (membrane); GO:0016021 (integral component of membrane); GO:0006631 (fatty acid metabolic process); GO:0016491 (oxidoreductase activity); GO:0016616 (oxidoreductase activity, acting on the CH-OH group of donors, NAD or NADP as acceptor); GO:0070403 (NAD+ binding); GO:0003857 (3-hydroxyacyl-CoA dehydrogenase activity); GO:0055114 (oxidation-reduction process)	-3.06502	-6.11733	9.51583e-10	5.14272e-07
WBGene00016178	177655		mesp-1	MEiotic SPindle	protein_coding		-3.7214	-6.04582	1.4865e-09	7.80616e-07
WBGene00002073	172329		ima-2	Importin subunit alpha-2	protein_coding	GO:0006606 (protein import into nucleus); GO:0061608 (nuclear import signal receptor activity); GO:0005737 (cytoplasm); GO:0005515 (protein binding)	-3.37991	-6.03966	1.54441e-09	7.93001e-07
WBGene00013567	190716		Y75B12B.1		protein_coding		-4.48638	-6.02742	1.66599e-09	8.36836e-07
WBGene00015083	175804		egg-1	LDL receptor repeat-containing protein egg-1	protein_coding	GO:0005515 (protein binding)	-5.52852	-6.02394	1.70224e-09	8.36849e-07
WBGene00013950	191267		ZK262.3	Lipase ZK262.3	protein_coding	GO:0016787 (hydrolase activity); GO:0005576 (extracellular region); GO:0006629 (lipid metabolic process); GO:0016042 (lipid catabolic process)	4.05566	6.01647	1.78258e-09	8.58089e-07
WBGene00020946	179214		W02D7.11		protein_coding	GO:0016020 (membrane); GO:0016021 (integral component of membrane)	-8.57387	-5.97846	2.25254e-09	1.06219e-06
WBGene00015913	173668		C17F4.7		protein_coding		-3.59301	-5.96813	2.39986e-09	1.08728e-06
WBGene00003865	179183		oma-2	CCCH-type zinc finger protein oma-2	protein_coding	GO:0046872 (metal ion binding)	-4.13731	-5.96836	2.39655e-09	1.08728e-06
WBGene00008295	183774		nlp-39	Neuropeptide-Like Protein	protein_coding	GO:0007218 (neuropeptide signaling pathway)	-3.89383	-5.95838	2.54751e-09	1.13198e-06
WBGene00012020	180119	8908	gyg-2	GlYcoGenin like	protein_coding	GO:0005737 (cytoplasm); GO:0016757 (transferase activity, transferring glycosyl groups)	-3.09141	-5.92675	3.08995e-09	1.3471e-06
WBGene00015312	172170		C01G8.1		protein_coding		-3.46523	-5.87953	4.11434e-09	1.76048e-06
WBGene00008341	179835		ttr-44	TransThyretin-Related family domain	protein_coding	GO:0005576 (extracellular region); GO:0009986 (cell surface)	-3.59761	-5.8419	5.16077e-09	2.16809e-06
WBGene00016822	179144		C50E3.11		protein_coding		-5.00518	-5.83131	5.4995e-09	2.26913e-06
WBGene00014667			C06A1.4		pseudogene		-3.27639	-5.81686	5.99621e-09	2.43067e-06
WBGene00011037	172650		R05D11.9		protein_coding	GO:0016020 (membrane); GO:0016021 (integral component of membrane); GO:0046513 (ceramide biosynthetic process); GO:0046475 (glycerophospholipid catabolic process); GO:0006685 (sphingomyelin catabolic process); GO:0050290 (sphingomyelin phosphodiesterase D activity); GO:0005783 (endoplasmic reticulum); GO:0005794 (Golgi apparatus); GO:0005802 (trans-Golgi network)	-3.67729	-5.78731	7.15238e-09	2.84936e-06
WBGene00019146	186667		H02F09.3		protein_coding	GO:0016020 (membrane); GO:0016021 (integral component of membrane)	10.9313	5.77176	7.84493e-09	3.07229e-06
WBGene00000017	181418		abf-6	ABF-6; AntiBacterial Factor related	protein_coding		3.09461	5.74966	8.94233e-09	3.44369e-06
WBGene00022257	177406		puf-11	PUF (Pumilio/FBF) domain-containing	protein_coding	GO:0005634 (nucleus); GO:0005737 (cytoplasm); GO:0003723 (RNA binding); GO:0003730 (mRNA 3'-UTR binding); GO:0003729 (mRNA binding); GO:0010608 (posttranscriptional regulation of gene expression)	-3.68216	-5.71895	1.07184e-08	4.06e-06
WBGene00004987	259714		spp-2	SaPosin-like Protein family	protein_coding	GO:0050830 (defense response to Gram-positive bacterium)	-3.80602	-5.70995	1.13008e-08	4.21153e-06
WBGene00004044	266900		plk-3	Serine/threonine-protein kinase plk-3	protein_coding	GO:0004672 (protein kinase activity); GO:0006468 (protein phosphorylation); GO:0005515 (protein binding); GO:0005524 (ATP binding)	-3.99799	-5.70462	1.16604e-08	4.27658e-06
WBGene00003410	181202	8714	mrp-4		protein_coding	GO:0016020 (membrane); GO:0016021 (integral component of membrane); GO:0005524 (ATP binding); GO:0042626 (ATPase-coupled transmembrane transporter activity); GO:0000166 (nucleotide binding); GO:0022857 (transmembrane transporter activity); GO:0055085 (transmembrane transport); GO:0007040 (lysosome organization); GO:0010877 (lipid transport involved in lipid storage); GO:0030139 (endocytic vesicle…	-3.03701	-5.69879	1.20663e-08	4.35632e-06
WBGene00010769	173120	427	asah-1	Acid ceramidase	protein_coding	GO:0017064 (fatty acid amide hydrolase activity); GO:0005764 (lysosome); GO:0006631 (fatty acid metabolic process)	-3.10767	-5.67546	1.38318e-08	4.91689e-06
WBGene00008905	173182	158046	F17B5.1		protein_coding		-5.46253	-5.6721	1.41057e-08	4.93828e-06
WBGene00009701	174677		egg-3	Protein tyrosine phosphatase-like protein egg-3	protein_coding	GO:0006470 (protein dephosphorylation); GO:0004725 (protein tyrosine phosphatase activity)	-3.14969	-5.63616	1.73885e-08	5.99664e-06
WBGene00019495	173457		sdz-24	SKN-1 Dependent Zygotic transcript	protein_coding	GO:0003676 (nucleic acid binding)	-2.93175	-5.63361	1.76479e-08	5.99664e-06
WBGene00000671	353461		col-96	COLlagen	protein_coding	GO:0016020 (membrane); GO:0016021 (integral component of membrane); GO:0005615 (extracellular space); GO:0030198 (extracellular matrix organization); GO:0042302 (structural constituent of cuticle); GO:0005201 (extracellular matrix structural constituent); GO:0031012 (extracellular matrix)	2.75157	5.63033	1.79865e-08	6.02312e-06
WBGene00003231	174504		mex-6	Zinc finger protein mex-6	protein_coding	GO:0046872 (metal ion binding)	-3.03201	-5.61768	1.93533e-08	6.38825e-06
WBGene00007580	175480		C14B1.9		protein_coding		-3.46693	-5.61096	2.01204e-08	6.45698e-06
WBGene00077732	174029		szy-4	Suppressor of ZYg-1	protein_coding	GO:0005515 (protein binding); GO:0010824 (regulation of centrosome duplication)	-3.58515	-5.61294	1.98912e-08	6.45698e-06
WBGene00020948	179061		era-1	Embryonic mRna (mRNA) Anterior	protein_coding		-2.9448	-5.57483	2.47766e-08	7.84231e-06
WBGene00001477	177958	2330	fmo-2	Dimethylaniline monooxygenase [N-oxide-forming]	protein_coding	GO:0016020 (membrane); GO:0016021 (integral component of membrane); GO:0016491 (oxidoreductase activity); GO:0050660 (flavin adenine dinucleotide binding); GO:0004497 (monooxygenase activity); GO:0004499 (N,N-dimethylaniline monooxygenase activity); GO:0050661 (NADP binding); GO:0005783 (endoplasmic reticulum); GO:0005789 (endoplasmic reticulum membrane); GO:0043231 (intracellular membrane-bounde…	-5.48836	-5.56565	2.61181e-08	8.15519e-06
WBGene00015076	178914		B0238.12		protein_coding	GO:0005576 (extracellular region); GO:0010951 (negative regulation of endopeptidase activity); GO:0010466 (negative regulation of peptidase activity); GO:0030414 (peptidase inhibitor activity); GO:0004867 (serine-type endopeptidase inhibitor activity)	4.53837	5.55974	2.70172e-08	8.30949e-06
WBGene00009691	174805		F44E5.4		protein_coding	GO:0005524 (ATP binding); GO:0005737 (cytoplasm); GO:0000166 (nucleotide binding); GO:0016887 (ATPase activity); GO:0042026 (protein refolding); GO:0051082 (unfolded protein binding); GO:0031072 (heat shock protein binding); GO:0034620 (cellular response to unfolded protein); GO:0044183 (protein folding chaperone); GO:0051085 (chaperone cofactor-dependent protein refolding); GO:0051787 (misfolded…	-1407.73	-5.55772	2.73315e-08	8.30949e-06
WBGene00011011	181453		R04D3.3		protein_coding		-3.72375	-5.54517	2.93677e-08	8.81259e-06
WBGene00016667	183472		C45E5.4		protein_coding		10.1082	5.53731	3.07147e-08	9.09863e-06
WBGene00020592	178880		ugt-12	UDP-GlucuronosylTransferase	protein_coding	GO:0016020 (membrane); GO:0016021 (integral component of membrane); GO:0016740 (transferase activity); GO:0043231 (intracellular membrane-bounded organelle); GO:0015020 (glucuronosyltransferase activity); GO:0016757 (transferase activity, transferring glycosyl groups); GO:0008194 (UDP-glycosyltransferase activity)	3.35784	5.52852	3.2294e-08	9.4454e-06
WBGene00022645	191209		ZK6.11		protein_coding	GO:0045087 (innate immune response); GO:0045121 (membrane raft)	2.8522	5.51957	3.39824e-08	9.81496e-06
WBGene00017936	177186		zipt-2.2	Zrt (ZRT), Irt-(IRT-) like Protein Transporter	protein_coding	GO:0016020 (membrane); GO:0016021 (integral component of membrane); GO:0005886 (plasma membrane); GO:0055085 (transmembrane transport); GO:0005385 (zinc ion transmembrane transporter activity); GO:0071577 (zinc ion transmembrane transport); GO:0030001 (metal ion transport); GO:0046873 (metal ion transmembrane transporter activity)	3.22835	5.51511	3.48571e-08	9.94331e-06
WBGene00011320	179997		T01C3.3		protein_coding	GO:0046872 (metal ion binding)	-3.3398	-5.50853	3.6184e-08	1.0196e-05
WBGene00010353	178064		memi-3	MEiosis-to-MItosis transition associated	protein_coding		-3.75674	-5.49427	3.92319e-08	1.09216e-05
WBGene00020599	188630		T20B6.3		protein_coding		4.18818	5.49184	3.97762e-08	1.09413e-05
WBGene00009113	172918		maph-1.2	Microtubule-Associated Protein Homolog	protein_coding	GO:0003779 (actin binding); GO:0005829 (cytosol); GO:0045202 (synapse); GO:0008017 (microtubule binding); GO:0000226 (microtubule cytoskeleton organization); GO:0043025 (neuronal cell body); GO:0005874 (microtubule); GO:0030425 (dendrite); GO:0007409 (axonogenesis); GO:0005875 (microtubule associated complex); GO:0016358 (dendrite development); GO:0031114 (regulation of microtubule depolymerizati…	-3.24436	-5.48277	4.18717e-08	1.13822e-05
WBGene00008032	178255		C39E9.8		protein_coding		2.70843	5.48069	4.23671e-08	1.1383e-05
WBGene00011244	187804		R11D1.3		protein_coding		4.52392	5.45087	5.01251e-08	1.33125e-05
WBGene00010621	172670		egg-6	Leucine-rich repeat-containing protein egg-6	protein_coding	GO:0005515 (protein binding)	-3.06487	-5.42375	5.83621e-08	1.51948e-05
WBGene00010555	186980		K04C1.5		protein_coding	GO:0005634 (nucleus); GO:0005524 (ATP binding); GO:0005737 (cytoplasm); GO:0004672 (protein kinase activity); GO:0004674 (protein serine/threonine kinase activity); GO:0006468 (protein phosphorylation); GO:0016301 (kinase activity); GO:0016310 (phosphorylation); GO:0018105 (peptidyl-serine phosphorylation); GO:0032436 (positive regulation of proteasomal ubiquitin-dependent protein catabolic proce…	-6.64574	-5.42324	5.85275e-08	1.51948e-05
WBGene00004243	177332		puf-7	Pumilio domain-containing protein 7	protein_coding	GO:0003723 (RNA binding)	-3.15863	-5.39204	6.96624e-08	1.78847e-05
WBGene00007643	172767		marc-3	MARCH (Membrane-Associated Ring finger (C3HC4)) homolog	protein_coding	GO:0016020 (membrane); GO:0016021 (integral component of membrane); GO:0016567 (protein ubiquitination); GO:0008270 (zinc ion binding); GO:0004842 (ubiquitin-protein transferase activity); GO:0000209 (protein polyubiquitination)	-3.46135	-5.38821	7.11631e-08	1.80692e-05
WBGene00011289	177959		R102.2		protein_coding		3.19756	5.36568	8.0646e-08	2.02544e-05
WBGene00007624	175535		hrde-1	Heritable RNAi Deficient	protein_coding	GO:0003676 (nucleic acid binding); GO:0005634 (nucleus); GO:0007281 (germ cell development); GO:0016246 (RNA interference); GO:0031332 (RNAi effector complex); GO:0005515 (protein binding)	-3.03652	-5.36224	8.21969e-08	2.04219e-05
WBGene00003755	178319		nlp-17	Neuropeptide-Like Protein	protein_coding	GO:0007218 (neuropeptide signaling pathway)	2.80465	5.35221	8.68842e-08	2.13569e-05
WBGene00011061	172463		wago-1	Argonaute protein wago-1	protein_coding	GO:0003676 (nucleic acid binding); GO:0007275 (multicellular organism development); GO:0031047 (gene silencing by RNA); GO:0043186 (P granule); GO:0017151 (DEAD/H-box RNA helicase binding); GO:0005515 (protein binding)	-2.79861	-5.32442	1.01277e-07	2.46327e-05
WBGene00016291	177351		C31H1.8		protein_coding		-3.18004	-5.28747	1.24021e-07	2.98503e-05
WBGene00016048	178736		C24B9.3		protein_coding		-2.73672	-5.26611	1.39346e-07	3.3193e-05
WBGene00001607	177808		gln-6	GLutamiNe synthetase (Glutamate-ammonia ligase)	protein_coding	GO:0005737 (cytoplasm); GO:0003824 (catalytic activity); GO:0006807 (nitrogen compound metabolic process); GO:0004356 (glutamate-ammonia ligase activity); GO:0006542 (glutamine biosynthetic process)	-2.59984	-5.26036	1.43776e-07	3.38989e-05
WBGene00010492	181502		meg-1		protein_coding	GO:0005515 (protein binding); GO:0000003 (reproduction); GO:0043186 (P granule); GO:0032504 (multicellular organism reproduction); GO:0036093 (germ cell proliferation); GO:1903864 (P granule disassembly)	-2.8611	-5.25599	1.47232e-07	3.42599e-05
WBGene00021056	173785		W06B4.1		protein_coding	GO:0046835 (carbohydrate phosphorylation); GO:0045127 (N-acetylglucosamine kinase activity)	-2.92759	-5.25469	1.48273e-07	3.42599e-05
WBGene00022797	176110		best-24	Bestrophin homolog 24	protein_coding		3.01887	5.24228	1.58603e-07	3.62841e-05
WBGene00007150	179795	47	acly-2	ATP-citrate synthase	protein_coding	GO:0005524 (ATP binding); GO:0003824 (catalytic activity); GO:0046872 (metal ion binding); GO:0000166 (nucleotide binding); GO:0016740 (transferase activity); GO:0005737 (cytoplasm); GO:0005829 (cytosol); GO:0006629 (lipid metabolic process); GO:0006101 (citrate metabolic process); GO:0046912 (transferase activity, transferring acyl groups, acyl groups converted into alkyl on transfer); GO:000387…	-2.71215	-5.23833	1.62039e-07	3.67065e-05
WBGene00009081	179944		F23B12.4		protein_coding		2.70331	5.23454	1.65399e-07	3.7104e-05
WBGene00009497	3564789		F36H1.12		protein_coding		14.7109	5.23041	1.69136e-07	3.75775e-05
WBGene00011489	172804		T05F1.2		protein_coding		-2.65106	-5.18502	2.15997e-07	4.75317e-05
WBGene00009404	174325		F35C11.5		protein_coding	GO:0016020 (membrane); GO:0016021 (integral component of membrane); GO:0005576 (extracellular region); GO:0004623 (phospholipase A2 activity); GO:0006644 (phospholipid metabolic process); GO:0050482 (arachidonic acid secretion)	-3.43012	-5.17809	2.24167e-07	4.84075e-05
WBGene00004984	179070		spn-4	PIP-1	protein_coding	GO:0005634 (nucleus); GO:0005737 (cytoplasm); GO:0000381 (regulation of alternative mRNA splicing, via spliceosome); GO:0003676 (nucleic acid binding); GO:0003723 (RNA binding); GO:0005515 (protein binding); GO:0003729 (mRNA binding); GO:0007399 (nervous system development); GO:0043186 (P granule)	-2.5684	-5.17895	2.23142e-07	4.84075e-05
WBGene00001392	186902		far-8	Fatty Acid/Retinol binding protein	protein_coding	GO:0005576 (extracellular region); GO:0008289 (lipid binding)	2.81664	5.17415	2.28947e-07	4.8982e-05
WBGene00000866	177994		cyb-2.1	CYclin B	protein_coding	GO:0005634 (nucleus); GO:0005737 (cytoplasm); GO:0005813 (centrosome); GO:0000079 (regulation of cyclin-dependent protein serine/threonine kinase activity); GO:0000307 (cyclin-dependent protein kinase holoenzyme complex); GO:0016538 (cyclin-dependent protein serine/threonine kinase regulator activity); GO:0044772 (mitotic cell cycle phase transition); GO:0001556 (oocyte maturation); GO:0008595 (a…	-3.00155	-5.16557	2.39702e-07	5.06127e-05
WBGene00001599	172361		glh-2	ATP-dependent RNA helicase glh-2	protein_coding	GO:0004386 (helicase activity); GO:0003676 (nucleic acid binding); GO:0005524 (ATP binding); GO:0008270 (zinc ion binding)	-3.20709	-5.1646	2.4095e-07	5.06127e-05
WBGene00011350	174273		perm-1	PERMeable eggshell	protein_coding	GO:0016020 (membrane); GO:0016021 (integral component of membrane)	-3.72547	-5.16086	2.45813e-07	5.07121e-05
WBGene00004217	171950		ptr-2	PaTched Related family	protein_coding	GO:0016020 (membrane); GO:0016021 (integral component of membrane); GO:0005886 (plasma membrane); GO:0022857 (transmembrane transporter activity); GO:0055085 (transmembrane transport); GO:0030659 (cytoplasmic vesicle membrane); GO:0006897 (endocytosis); GO:0090597 (nematode male tail mating organ morphogenesis); GO:0018996 (molting cycle, collagen and cuticulin-based cuticle); GO:0000281 (mitotic…	-2.76127	-5.16186	2.44508e-07	5.07121e-05
WBGene00003184	172374		mei-2	Meiotic spindle formation protein 2	protein_coding	GO:0008017 (microtubule binding)	-2.72863	-5.11421	3.15052e-07	6.44212e-05
WBGene00002348	172471	57644	myo-1	Myosin-1	protein_coding	GO:0016459 (myosin complex); GO:0003774 (motor activity); GO:0051015 (actin filament binding); GO:0005524 (ATP binding)	3.36406	5.11032	3.21612e-07	6.51857e-05
WBGene00019268	173994		H41C03.1		protein_coding		2.72544	5.10661	3.27992e-07	6.53326e-05
WBGene00003994	178867		pgl-3	Guanyl-specific ribonuclease pgl-3	protein_coding		-3.18705	-5.10776	3.26008e-07	6.53326e-05
WBGene00004078	179224		pos-1	Cytoplasmic zinc-finger protein; POsterior Segregation	protein_coding	GO:0046872 (metal ion binding); GO:0005829 (cytosol); GO:0003730 (mRNA 3'-UTR binding); GO:0009792 (embryo development ending in birth or egg hatching); GO:0005737 (cytoplasm); GO:0000122 (negative regulation of transcription by RNA polymerase II); GO:0001708 (cell fate specification); GO:0003714 (transcription corepressor activity); GO:0043186 (P granule); GO:0003727 (single-stranded RNA binding…	-2.52376	-5.0787	3.80018e-07	7.50486e-05
WBGene00015623	180870	79639	C09B8.4		protein_coding	GO:0016020 (membrane); GO:0016021 (integral component of membrane)	3.18404	5.07006	3.97697e-07	7.78745e-05
WBGene00003230	178296		mex-5	Zinc finger protein mex-5	protein_coding	GO:0046872 (metal ion binding)	-2.54182	-5.06839	4.01204e-07	7.7901e-05
WBGene00009186	177791	57552	trcs-1	TRansport of membrane to Cell Surface	protein_coding	GO:0016020 (membrane); GO:0016021 (integral component of membrane); GO:0016787 (hydrolase activity); GO:0052689 (carboxylic ester hydrolase activity)	-2.56455	-5.05698	4.2594e-07	8.20147e-05
WBGene00015677	178986		cpg-4	Chondroitin proteoglycan 4	protein_coding		-3.00388	-5.04509	4.53315e-07	8.65645e-05
WBGene00011898	179480		T21C9.13		protein_coding	GO:0016020 (membrane); GO:0016021 (integral component of membrane)	-2.97413	-5.03714	4.72551e-07	8.9498e-05
WBGene00003992	177461		pgl-1	Guanyl-specific ribonuclease pgl-1	protein_coding	GO:0016020 (membrane); GO:0016021 (integral component of membrane); GO:0005515 (protein binding); GO:0000003 (reproduction); GO:0043186 (P granule); GO:0048477 (oogenesis); GO:0043621 (protein self-association); GO:0007276 (gamete generation); GO:0003723 (RNA binding); GO:0042078 (germ-line stem cell division); GO:0030719 (P granule organization)	-2.77696	-5.03214	4.85029e-07	9.11145e-05
WBGene00007332	174551		C05C10.5		protein_coding	GO:0005515 (protein binding)	-2.63814	-5.02481	5.03921e-07	9.16819e-05
WBGene00014047	174613		clec-61	C-type LECtin	protein_coding	GO:0030246 (carbohydrate binding); GO:0050830 (defense response to Gram-positive bacterium)	-13.9048	-5.02535	5.02526e-07	9.16819e-05
WBGene00004242	174947		puf-6	Pumilio domain-containing protein 6	protein_coding	GO:0003723 (RNA binding)	-2.87802	-5.02778	4.96195e-07	9.16819e-05
WBGene00012104	173116		sygl-1		protein_coding		-2.84445	-5.02856	4.94164e-07	9.16819e-05
WBGene00000717	179296		col-144	COLlagen	protein_coding	GO:0042302 (structural constituent of cuticle)	2.68503	5.00819	5.49455e-07	9.84164e-05
WBGene00005394	191254		srh-179	Serpentine Receptor, class H	protein_coding	GO:0016020 (membrane); GO:0016021 (integral component of membrane)	-10.9489	-5.00918	5.46613e-07	9.84164e-05
WBGene00000913	176869		daf-18	Phosphatidylinositol 3,4,5-trisphosphate 3-phosphatase and dual-specificity protein phosphatase daf-18	protein_coding	GO:0016311 (dephosphorylation); GO:0006470 (protein dephosphorylation); GO:0004725 (protein tyrosine phosphatase activity)	-2.49801	-5.00169	5.68301e-07	0.000100238
WBGene00009743	172909		sptf-1	SP (Specificity Protein) Transcription Factor	protein_coding	GO:0000978 (RNA polymerase II cis-regulatory region sequence-specific DNA binding); GO:0000981 (DNA-binding transcription factor activity, RNA polymerase II-specific); GO:0006357 (regulation of transcription by RNA polymerase II)	2.59335	5.00218	5.66845e-07	0.000100238
WBGene00006464	173532		bath-47	BTB and MATH domain-containing protein 47	protein_coding	GO:0005515 (protein binding)	-7.17026	-4.99933	5.75311e-07	0.000100706
WBGene00013380	178305		memi-2	MEiosis-to-MItosis transition associated	protein_coding		-4.01708	-4.9939	5.91708e-07	0.000102797
WBGene00044242	3565544		C54C8.12		protein_coding		-3.2825	-4.99069	6.01643e-07	0.000103743
WBGene00007290	181388		C04B4.2		protein_coding	GO:0005737 (cytoplasm); GO:0010629 (negative regulation of gene expression)	-3.78892	-4.98898	6.06982e-07	0.000103888
WBGene00013559	190712		Y75B8A.28		protein_coding		-3.78405	-4.97372	6.56786e-07	0.000111586
WBGene00020652	171980		egg-4	Inactive protein-tyrosine phosphatase egg-4	protein_coding	GO:0016311 (dephosphorylation); GO:0006470 (protein dephosphorylation); GO:0004725 (protein tyrosine phosphatase activity); GO:0016791 (phosphatase activity)	-2.9458	-4.95428	7.25993e-07	0.000121556
WBGene00009692	174806		F44E5.5		protein_coding	GO:0005524 (ATP binding); GO:0005737 (cytoplasm); GO:0000166 (nucleotide binding); GO:0016887 (ATPase activity); GO:0042026 (protein refolding); GO:0051082 (unfolded protein binding); GO:0031072 (heat shock protein binding); GO:0034620 (cellular response to unfolded protein); GO:0044183 (protein folding chaperone); GO:0051085 (chaperone cofactor-dependent protein refolding); GO:0051787 (misfolded…	-1396.15	-4.95483	7.23926e-07	0.000121556
WBGene00009895	178251		scl-2	SCP-Like extracellular protein	protein_coding	GO:0005615 (extracellular space)	-3.07762	-4.94363	7.66797e-07	0.000127465
WBGene00009396	174928		clec-65	C-type LECtin	protein_coding	GO:0030246 (carbohydrate binding)	-3.46258	-4.93807	7.8898e-07	0.000130215
WBGene00017548	174237		F18A1.7		protein_coding		-2.51455	-4.93509	8.01119e-07	0.000131281
WBGene00013485	190560		Y69H2.10		protein_coding	GO:0005576 (extracellular region); GO:0010951 (negative regulation of endopeptidase activity); GO:0010466 (negative regulation of peptidase activity); GO:0030414 (peptidase inhibitor activity); GO:0004867 (serine-type endopeptidase inhibitor activity)	3.10765	4.93214	8.13337e-07	0.000132345
WBGene00017986	178836		F32D1.7		protein_coding		-2.5803	-4.93038	8.20689e-07	0.000132607
WBGene00017177	184092		F02E8.4		protein_coding		-3.40419	-4.9188	8.70754e-07	0.000139642
WBGene00009388	179591		F35B12.9		protein_coding	GO:0016020 (membrane); GO:0016021 (integral component of membrane)	2.63196	4.91756	8.76313e-07	0.000139642
WBGene00008743	174794		F13D12.9		protein_coding	GO:0008610 (lipid biosynthetic process)	3.09165	4.91321	8.95954e-07	0.000141794
WBGene00008707	178533		F11E6.3		protein_coding		2.55368	4.9045	9.36642e-07	0.000147225
WBGene00015514	174259		nlp-77	Neuropeptide-Like Protein	protein_coding		2.44018	4.89888	9.63842e-07	0.000150477
WBGene00011284	179769		ttr-27	TransThyretin-Related family domain	protein_coding	GO:0005576 (extracellular region); GO:0009986 (cell surface)	3.23755	4.89674	9.74386e-07	0.000151102
WBGene00009097	179696		fipr-2	FIP (Fungus-Induced Protein) Related	protein_coding		2.47652	4.89433	9.86434e-07	0.00015195
WBGene00018010	178555		F33E11.2		protein_coding		-3.10055	-4.88648	1.02657e-06	0.000157085
WBGene00017426	180412		F13C5.5		protein_coding	GO:0016020 (membrane); GO:0016021 (integral component of membrane)	3.2655	4.87009	1.11549e-06	0.000169568
WBGene00012034	188916		T26C5.4		protein_coding		3.28392	4.86689	1.13368e-06	0.000171208
WBGene00006981	181051		zig-4	Zwei Ig domain protein zig-4	protein_coding	GO:0007155 (cell adhesion); GO:0005576 (extracellular region); GO:0005886 (plasma membrane); GO:0007411 (axon guidance); GO:0048666 (neuron development); GO:0005515 (protein binding)	3.02983	4.86455	1.14717e-06	0.00017212
WBGene00019622	180916		K10C2.7		protein_coding		4.09615	4.85448	1.20704e-06	0.000179935
WBGene00011928	188735		cutl-12	CUTiclin-Like	protein_coding	GO:0016020 (membrane); GO:0016021 (integral component of membrane)	3.26301	4.85203	1.22205e-06	0.000181005
WBGene00000728	186301		col-155	Putative cuticle collagen 155	protein_coding	GO:0042302 (structural constituent of cuticle)	2.38715	4.85005	1.23433e-06	0.000181659
WBGene00015756	178576		C14C6.2		protein_coding		-3.42664	-4.84607	1.25933e-06	0.000184165
WBGene00021491	189789	118881	comt-4	Catechol-O-MethylTransferase family	protein_coding	GO:0008168 (methyltransferase activity); GO:0032259 (methylation); GO:0016740 (transferase activity); GO:0008171 (O-methyltransferase activity); GO:0008757 (S-adenosylmethionine-dependent methyltransferase activity)	-8.61862	-4.84367	1.27463e-06	0.000185231
WBGene00010135	186344		F55H12.4		protein_coding		2.48011	4.83147	1.3553e-06	0.000195722
WBGene00000473	172219		cey-2	C. Elegans Y-box	protein_coding	GO:0005634 (nucleus); GO:0003676 (nucleic acid binding); GO:0010468 (regulation of gene expression); GO:1990904 (ribonucleoprotein complex)	-2.45766	-4.82793	1.37958e-06	0.000197991
WBGene00016898	181031		clik-2	CaLponIn-liKe proteins	protein_coding		2.77351	4.81569	1.46694e-06	0.000209229
WBGene00010061	178054	8458	F54E12.2		protein_coding	GO:0005524 (ATP binding); GO:0000166 (nucleotide binding); GO:0070615 (nucleosome-dependent ATPase activity)	-2.51742	-4.80505	1.54714e-06	0.000219314
WBGene00016163	173822		C27D9.1		protein_coding	GO:0016020 (membrane); GO:0006486 (protein glycosylation); GO:0008417 (fucosyltransferase activity); GO:0036065 (fucosylation); GO:0046920 (alpha-(1->3)-fucosyltransferase activity)	-3.01894	-4.79791	1.60329e-06	0.000223167
WBGene00010354	178065		cyp-31A2	CYtochrome P450 family	protein_coding	GO:0046872 (metal ion binding); GO:0016491 (oxidoreductase activity); GO:0004497 (monooxygenase activity); GO:0020037 (heme binding); GO:0005506 (iron ion binding); GO:0016705 (oxidoreductase activity, acting on paired donors, with incorporation or reduction of molecular oxygen); GO:0048598 (embryonic morphogenesis); GO:0008356 (asymmetric cell division); GO:0040038 (polar body extrusion after me…	-2.92593	-4.79949	1.5907e-06	0.000223167
WBGene00020091	171627		rnp-8	RNP (RRM RNA binding domain) containing	protein_coding	GO:0005634 (nucleus); GO:0000381 (regulation of alternative mRNA splicing, via spliceosome); GO:0003676 (nucleic acid binding); GO:0003723 (RNA binding); GO:0003727 (single-stranded RNA binding); GO:0019899 (enzyme binding); GO:0034046 (poly(G) binding); GO:0032991 (protein-containing complex); GO:1990749 (polynucleotide adenylyltransferase activator activity); GO:1904247 (positive regulation of …	-2.59349	-4.79888	1.59557e-06	0.000223167
WBGene00020329	173531		bath-26	BTB and MATH domain containing	protein_coding	GO:0005515 (protein binding)	-10.8732	-4.77179	1.82592e-06	0.000252633
WBGene00012747	189809		Y40H7A.10		protein_coding	GO:0005764 (lysosome); GO:0006508 (proteolysis); GO:0004197 (cysteine-type endopeptidase activity); GO:0005615 (extracellular space); GO:0008234 (cysteine-type peptidase activity); GO:0051603 (proteolysis involved in cellular protein catabolic process)	-3.39039	-4.76868	1.85438e-06	0.000255043
WBGene00020938	189114		clec-218	C-type LECtin	protein_coding	GO:0030246 (carbohydrate binding); GO:0050830 (defense response to Gram-positive bacterium)	-2.72679	-4.76574	1.88165e-06	0.000257263
WBGene00021596	266877	92369	spsb-2	SPSB (SPry and Socs Box) family	protein_coding	GO:0043161 (proteasome-mediated ubiquitin-dependent protein catabolic process); GO:0019005 (SCF ubiquitin ligase complex); GO:0005515 (protein binding)	-2.60871	-4.75506	1.98388e-06	0.000269644
WBGene00008385	172638		D1081.7		protein_coding		-2.49027	-4.75269	2.00733e-06	0.000271236
WBGene00008522	3565387		nlp-59	Neuropeptide-Like Protein	protein_coding	GO:0016020 (membrane); GO:0016021 (integral component of membrane); GO:0007218 (neuropeptide signaling pathway)	2.64914	4.74921	2.04209e-06	0.000274329
WBGene00014253	174521		ZK1320.3		protein_coding		-3.27348	-4.7446	2.08918e-06	0.000279032
WBGene00007913	183193	1549,1553,1548	cyp-36A1	Probable cytochrome P450 CYP36A1	protein_coding	GO:0016705 (oxidoreductase activity, acting on paired donors, with incorporation or reduction of molecular oxygen); GO:0005506 (iron ion binding); GO:0020037 (heme binding); GO:0055114 (oxidation-reduction process)	3.39043	4.74068	2.13001e-06	0.000282851
WBGene00000781	179637		cpr-1	Gut-specific cysteine proteinase	protein_coding	GO:0008234 (cysteine-type peptidase activity); GO:0006508 (proteolysis)	-2.54256	-4.73807	2.1576e-06	0.000284877
WBGene00016485	180497		meg-4		protein_coding	GO:0005515 (protein binding); GO:1903863 (P granule assembly); GO:0043186 (P granule); GO:0036093 (germ cell proliferation); GO:0051640 (organelle localization)	-3.03407	-4.73396	2.20184e-06	0.000289066
WBGene00011376	172604		gla-3		protein_coding	GO:0046872 (metal ion binding); GO:0005829 (cytosol); GO:0003730 (mRNA 3'-UTR binding); GO:0005515 (protein binding); GO:0005737 (cytoplasm); GO:0005938 (cell cortex)	-2.68357	-4.72559	2.29451e-06	0.000299531
WBGene00004986	176452		spp-1	SaPosin-like Protein family	protein_coding	GO:0055085 (transmembrane transport); GO:0045087 (innate immune response); GO:0050829 (defense response to Gram-negative bacterium); GO:0050830 (defense response to Gram-positive bacterium); GO:0015267 (channel activity); GO:0035915 (pore formation in membrane of other organism); GO:0046930 (pore complex)	-2.57357	-4.72086	2.34853e-06	0.000304861
WBGene00009394	174927		clec-63	C-type LECtin	protein_coding	GO:0030246 (carbohydrate binding)	-2.67217	-4.71264	2.44532e-06	0.000315651
WBGene00019833	175755		R02F2.4		protein_coding	GO:0005576 (extracellular region); GO:0008061 (chitin binding)	-3.14169	-4.67303	2.96792e-06	0.000380982
WBGene00002368	178210		let-99		protein_coding	GO:0035556 (intracellular signal transduction)	-2.617	-4.66917	3.02425e-06	0.000386068
WBGene00011153	181409		R09A8.2		protein_coding		-3.40583	-4.65675	3.21244e-06	0.000407839
WBGene00004237	173362		ptr-23	PaTched Related family	protein_coding	GO:0016020 (membrane); GO:0016021 (integral component of membrane); GO:0005886 (plasma membrane); GO:0030659 (cytoplasmic vesicle membrane); GO:0006897 (endocytosis); GO:0090597 (nematode male tail mating organ morphogenesis); GO:0018996 (molting cycle, collagen and cuticulin-based cuticle); GO:0045138 (nematode male tail tip morphogenesis)	2.42605	4.65166	3.2927e-06	0.000415744
WBGene00000935	173931		daz-1	DAZ protein 1	protein_coding	GO:0003729 (mRNA binding); GO:0003676 (nucleic acid binding); GO:0005515 (protein binding)	-2.55419	-4.62301	3.78219e-06	0.000474953
WBGene00019111	179278		F59E11.5		protein_coding	GO:0016020 (membrane); GO:0016021 (integral component of membrane)	2.87009	4.60809	4.06393e-06	0.000507574
WBGene00016769	177668		C49C8.5		protein_coding	GO:0005615 (extracellular space); GO:0045087 (innate immune response); GO:0062023 (collagen-containing extracellular matrix)	2.47956	4.59933	4.23858e-06	0.000526541
WBGene00020035	172007		egg-5	Inactive protein-tyrosine phosphatase egg-5	protein_coding	GO:0016311 (dephosphorylation); GO:0006470 (protein dephosphorylation); GO:0004725 (protein tyrosine phosphatase activity); GO:0016791 (phosphatase activity)	-3.01609	-4.59386	4.35112e-06	0.00053763
WBGene00007203	178264		best-1	Bestrophin homolog 1	protein_coding		2.90073	4.58206	4.60422e-06	0.000565878
WBGene00022775	177323		ZK616.5		protein_coding		-3.0718	-4.57728	4.71053e-06	0.00057588
WBGene00000474	172211		cey-3	C. Elegans Y-box	protein_coding	GO:0005634 (nucleus); GO:0003676 (nucleic acid binding); GO:0010468 (regulation of gene expression); GO:1990904 (ribonucleoprotein complex); GO:0043021 (ribonucleoprotein complex binding)	-2.31258	-4.57509	4.76019e-06	0.000577386
WBGene00000784	179053		cpr-4	Cathepsin B-like cysteine proteinase 4	protein_coding	GO:0008234 (cysteine-type peptidase activity); GO:0006508 (proteolysis)	-2.37637	-4.57453	4.77282e-06	0.000577386
WBGene00003096	178772		lys-7	Lysozyme-like protein 7	protein_coding	GO:0009253 (peptidoglycan catabolic process); GO:0003796 (lysozyme activity); GO:0016998 (cell wall macromolecule catabolic process)	-2.37328	-4.57032	4.8698e-06	0.000586049
WBGene00003091	179429		lys-2	Lysozyme-like protein 2	protein_coding	GO:0009253 (peptidoglycan catabolic process); GO:0003796 (lysozyme activity); GO:0016998 (cell wall macromolecule catabolic process)	-3.40138	-4.56143	5.0807e-06	0.000608263
WBGene00003864	177703		oma-1	CCCH-type zinc finger protein oma-1	protein_coding	GO:0046872 (metal ion binding)	-2.38676	-4.56026	5.10897e-06	0.000608495
WBGene00000723	181814		col-150	COLlagen	protein_coding	GO:0016020 (membrane); GO:0016021 (integral component of membrane); GO:0042302 (structural constituent of cuticle)	3.02439	4.55741	5.17888e-06	0.000613657
WBGene00010516	186898		K02E11.7		protein_coding		2.88044	4.55419	5.25873e-06	0.000616793
WBGene00006583	174612		tnc-2	Troponin C, isoform 2	protein_coding	GO:0005509 (calcium ion binding); GO:0046872 (metal ion binding); GO:0050790 (regulation of catalytic activity); GO:0030234 (enzyme regulator activity); GO:0031013 (troponin I binding)	2.55466	4.55421	5.25828e-06	0.000616793
WBGene00002136	172488		inx-14	Innexin-14	protein_coding		-2.57037	-4.54556	5.47898e-06	0.000639381
WBGene00044260	3565150		Y87G2A.19		protein_coding	GO:0016020 (membrane); GO:0016021 (integral component of membrane); GO:0046872 (metal ion binding); GO:0005765 (lysosomal membrane)	2.90031	4.54136	5.5893e-06	0.000648977
WBGene00020016	178572	3988	lipl-3	Lipase	protein_coding	GO:0016787 (hydrolase activity); GO:0005576 (extracellular region); GO:0006629 (lipid metabolic process); GO:0016042 (lipid catabolic process); GO:0016788 (hydrolase activity, acting on ester bonds); GO:0005764 (lysosome); GO:0043202 (lysosomal lumen)	-4.54331	-4.53694	5.7077e-06	0.00065613
WBGene00011429	179530		T04C12.7		protein_coding	GO:0016020 (membrane); GO:0016021 (integral component of membrane)	3.52827	4.5372	5.70059e-06	0.00065613
WBGene00011891	179474		del-6	DEgenerin Like	protein_coding	GO:0016020 (membrane); GO:0016021 (integral component of membrane); GO:0006811 (ion transport); GO:0005887 (integral component of plasma membrane); GO:0005272 (sodium channel activity); GO:0006814 (sodium ion transport); GO:0035725 (sodium ion transmembrane transport); GO:0015280 (ligand-gated sodium channel activity)	2.34607	4.51769	6.25185e-06	0.000715125
WBGene00017621	184707		F20A1.10		protein_coding		2.34064	4.51551	6.31658e-06	0.00071897
WBGene00009968	179523		fig-1		protein_coding	GO:0016020 (membrane); GO:0016021 (integral component of membrane)	2.48986	4.5048	6.64347e-06	0.00075247
WBGene00000739	180902		col-166	COLlagen	protein_coding	GO:0016020 (membrane); GO:0016021 (integral component of membrane); GO:0042302 (structural constituent of cuticle)	2.30888	4.48572	7.26672e-06	0.000810506
WBGene00001074	177187		dpy-13	Cuticle collagen dpy-13	protein_coding	GO:0042302 (structural constituent of cuticle)	10.468	4.48491	7.29451e-06	0.000810506
WBGene00009096	259653		fipr-1	FIP (Fungus-Induced Protein) Related	protein_coding		2.30147	4.4879	7.193e-06	0.000810506
WBGene00194855	13191537		Y75B8A.44		protein_coding	GO:0016020 (membrane); GO:0016021 (integral component of membrane)	4.34875	4.48486	7.29617e-06	0.000810506
WBGene00003228	174836		mex-1	Muscle EXcess	protein_coding	GO:0046872 (metal ion binding); GO:0005829 (cytosol); GO:0003730 (mRNA 3'-UTR binding); GO:0009792 (embryo development ending in birth or egg hatching); GO:0005737 (cytoplasm); GO:0001708 (cell fate specification); GO:0043186 (P granule); GO:0003723 (RNA binding); GO:0001704 (formation of primary germ layer); GO:0009880 (embryonic pattern specification); GO:0030010 (establishment of cell polarity)	-2.29445	-4.47926	7.49015e-06	0.000828074
WBGene00000867	171993		cyb-2.2	CYclin B	protein_coding	GO:0005634 (nucleus); GO:0005737 (cytoplasm); GO:0005813 (centrosome); GO:0000079 (regulation of cyclin-dependent protein serine/threonine kinase activity); GO:0000307 (cyclin-dependent protein kinase holoenzyme complex); GO:0016538 (cyclin-dependent protein serine/threonine kinase regulator activity); GO:0051321 (meiotic cell cycle); GO:0044772 (mitotic cell cycle phase transition); GO:0001556 (…	-2.38481	-4.4688	7.86579e-06	0.000858604
WBGene00020684	177454		T22D1.5		protein_coding	GO:0000159 (protein phosphatase type 2A complex); GO:0006470 (protein dephosphorylation); GO:0019888 (protein phosphatase regulator activity); GO:0043666 (regulation of phosphoprotein phosphatase activity)	-2.36214	-4.46858	7.8742e-06	0.000858604
WBGene00021460	171798		zwl-1		protein_coding	GO:0005737 (cytoplasm); GO:0005856 (cytoskeleton); GO:0007275 (multicellular organism development); GO:0005515 (protein binding); GO:0007049 (cell cycle); GO:0051301 (cell division); GO:0005694 (chromosome); GO:0051321 (meiotic cell cycle); GO:0000775 (chromosome, centromeric region); GO:0000776 (kinetochore); GO:0000777 (condensed chromosome kinetochore); GO:0005938 (cell cortex); GO:0005819 (sp…	-2.48281	-4.46848	7.87778e-06	0.000858604
WBGene00020910	189077	80168	dgtr-1	DGAT (Acyl-CoA:DiacylGlycerol AcylTransferase) Related	protein_coding	GO:0016020 (membrane); GO:0016021 (integral component of membrane); GO:0016740 (transferase activity); GO:0016746 (transferase activity, transferring acyl groups); GO:0016747 (transferase activity, transferring acyl groups other than amino-acyl groups); GO:0005789 (endoplasmic reticulum membrane); GO:0005783 (endoplasmic reticulum); GO:0006629 (lipid metabolic process); GO:0004144 (diacylglycerol…	-3.07916	-4.46648	7.95179e-06	0.000862601
WBGene00000479	176061	1656	cgh-1	ATP-dependent RNA helicase cgh-1	protein_coding	GO:0004386 (helicase activity); GO:0003676 (nucleic acid binding); GO:0005524 (ATP binding)	-2.27848	-4.45501	8.38888e-06	0.000904226
WBGene00010717	3565446		K09C8.7		protein_coding		-4.23025	-4.45438	8.41377e-06	0.000904226
WBGene00001597	174174		gld-3	Defective in germ line development protein 3	protein_coding		-2.31664	-4.44913	8.62182e-06	0.000918479
WBGene00021658	171625		Y48G1A.2		protein_coding		-2.78595	-4.44903	8.62589e-06	0.000918479
WBGene00000503	180628	1118	cht-1	Probable endochitinase	protein_coding	GO:0008061 (chitin binding); GO:0004553 (hydrolase activity, hydrolyzing O-glycosyl compounds); GO:0005975 (carbohydrate metabolic process); GO:0005576 (extracellular region)	2.36303	4.43774	9.09064e-06	0.000963525
WBGene00003413	180289	8714	mrp-7		protein_coding	GO:0016020 (membrane); GO:0016021 (integral component of membrane); GO:0005524 (ATP binding); GO:0042626 (ATPase-coupled transmembrane transporter activity); GO:0000166 (nucleotide binding); GO:0022857 (transmembrane transporter activity); GO:0055085 (transmembrane transport); GO:0051597 (response to methylmercury); GO:0016887 (ATPase activity)	-2.3597	-4.43024	9.41304e-06	0.000990855
WBGene00001514	175776		xnd-1	X chromosome NonDisjunction factor	protein_coding		-2.61969	-4.42975	9.43426e-06	0.000990855
WBGene00017985	185201		neg-1	Negative Effect on Gut development	protein_coding	GO:0005634 (nucleus)	-2.69291	-4.42704	9.55339e-06	0.000998826
WBGene00021200	189467		cyp-31A3	CYtochrome P450 family	protein_coding	GO:0016020 (membrane); GO:0016021 (integral component of membrane); GO:0046872 (metal ion binding); GO:0016491 (oxidoreductase activity); GO:0004497 (monooxygenase activity); GO:0020037 (heme binding); GO:0005506 (iron ion binding); GO:0016705 (oxidoreductase activity, acting on paired donors, with incorporation or reduction of molecular oxygen); GO:0048598 (embryonic morphogenesis); GO:0008356 (…	-2.70476	-4.42167	9.79402e-06	0.00101937
WBGene00016586	178179	84179	C42C1.8		protein_coding	GO:0016020 (membrane); GO:0016021 (integral component of membrane); GO:0022857 (transmembrane transporter activity); GO:0055085 (transmembrane transport)	-2.41964	-4.41599	1.00549e-05	0.00104183
WBGene00044756	4363022		F58F12.4		protein_coding	GO:0016020 (membrane); GO:0016021 (integral component of membrane)	2.62852	4.41	1.03368e-05	0.00106626
WBGene00303423			F10D7.11		protein_coding		2.96723	4.40806	1.043e-05	0.00107109
WBGene00010036	186223		cpar-1	Histone H3-like centromeric protein cpar-1	protein_coding	GO:0046982 (protein heterodimerization activity); GO:0000786 (nucleosome); GO:0003677 (DNA binding)	-2.80924	-4.40283	1.06847e-05	0.0010924
WBGene00017660	179293		F21C10.11		protein_coding		-3.04926	-4.39398	1.11295e-05	0.00112789
WBGene00018950	176035		F56C9.6		protein_coding		-2.49051	-4.39484	1.10853e-05	0.00112789
WBGene00007521	182517		C11E4.7		protein_coding		2.7068	4.39163	1.12505e-05	0.00113024
WBGene00018480	185808		otpl-7	OToPetrin-Like	protein_coding	GO:0016020 (membrane); GO:0016021 (integral component of membrane); GO:0005886 (plasma membrane); GO:0006811 (ion transport)	6.33556	4.39163	1.12505e-05	0.00113024
WBGene00008596	184217		clec-54	C-type LECtin	protein_coding	GO:0030246 (carbohydrate binding)	-8.02576	-4.37788	1.19837e-05	0.00119478
WBGene00020678	177234		T22B11.4		protein_coding	GO:0016020 (membrane); GO:0016021 (integral component of membrane); GO:0016301 (kinase activity); GO:0016310 (phosphorylation); GO:0018108 (peptidyl-tyrosine phosphorylation); GO:0005887 (integral component of plasma membrane); GO:0030424 (axon); GO:0004714 (transmembrane receptor protein tyrosine kinase activity); GO:0007169 (transmembrane receptor protein tyrosine kinase signaling pathway); GO:…	2.39175	4.37765	1.19964e-05	0.00119478
WBGene00011254	187844		R12G8.1		protein_coding	GO:0005524 (ATP binding); GO:0006468 (protein phosphorylation); GO:0004674 (protein serine/threonine kinase activity); GO:0035556 (intracellular signal transduction)	5.40998	4.37513	1.21357e-05	0.00120347
WBGene00008628	184253		ttr-21	TransThyretin-Related family domain	protein_coding	GO:0005576 (extracellular region); GO:0050829 (defense response to Gram-negative bacterium); GO:0009986 (cell surface)	2.31388	4.36306	1.28258e-05	0.00126647
WBGene00015894	173940		acdh-2	Acyl CoA DeHydrogenase	protein_coding	GO:0016491 (oxidoreductase activity); GO:0003995 (acyl-CoA dehydrogenase activity); GO:0016627 (oxidoreductase activity, acting on the CH-CH group of donors); GO:0050660 (flavin adenine dinucleotide binding); GO:0055114 (oxidation-reduction process)	2.93229	4.35602	1.32452e-05	0.00130016
WBGene00003216	189470		memi-1	MEiosis-to-MItosis transition associated	protein_coding		-2.88586	-4.35545	1.32796e-05	0.00130016
WBGene00006588	181052		tnt-3	TropoNin T	protein_coding	GO:0005861 (troponin complex); GO:0006936 (muscle contraction); GO:0006937 (regulation of muscle contraction); GO:0045214 (sarcomere organization); GO:0005523 (tropomyosin binding)	2.41673	4.34456	1.39556e-05	0.00136059
WBGene00020811	188908		T25G12.3		protein_coding		2.32702	4.34106	1.418e-05	0.00137665
WBGene00011501	176379		rmd-1	Regulator of microtubule dynamics protein 1	protein_coding	GO:0005737 (cytoplasm); GO:0005739 (mitochondrion); GO:0005856 (cytoskeleton); GO:0005874 (microtubule); GO:0007049 (cell cycle); GO:0051301 (cell division); GO:0008017 (microtubule binding); GO:0005876 (spindle microtubule); GO:0000922 (spindle pole); GO:0007059 (chromosome segregation); GO:0007052 (mitotic spindle organization); GO:0097431 (mitotic spindle pole); GO:0005515 (protein binding); G…	-2.23846	-4.33182	1.47879e-05	0.00142956
WBGene00011404	179564		T03F7.7		protein_coding		2.32523	4.33092	1.48487e-05	0.00142956
WBGene00000738	180710		col-165	COLlagen	protein_coding	GO:0016020 (membrane); GO:0016021 (integral component of membrane); GO:0042302 (structural constituent of cuticle)	-5.48759	-4.3289	1.49858e-05	0.00143191
WBGene00003229	171607		mex-3	Muscle EXcess	protein_coding	GO:0003723 (RNA binding); GO:0003676 (nucleic acid binding); GO:0005737 (cytoplasm); GO:0001708 (cell fate specification); GO:0043186 (P granule); GO:0003727 (single-stranded RNA binding); GO:0017148 (negative regulation of translation); GO:0009880 (embryonic pattern specification); GO:0048308 (organelle inheritance); GO:0051148 (negative regulation of muscle cell differentiation); GO:0005515 (pr…	-2.19723	-4.32873	1.49971e-05	0.00143191
WBGene00007408	182360		C07B5.3		protein_coding		3.82025	4.31024	1.63077e-05	0.00155064
WBGene00012101	179599		zip-10	Transcription factor zip-10	protein_coding	GO:0005634 (nucleus); GO:0003677 (DNA binding); GO:0010468 (regulation of gene expression); GO:0045087 (innate immune response); GO:0001046 (core promoter sequence-specific DNA binding)	-3.74262	-4.30715	1.65368e-05	0.00156598
WBGene00020139	177646	64850	eppl-1	Ethanolamine-phosphate phospho-lyase homolog 1	protein_coding	GO:0008483 (transaminase activity); GO:0030170 (pyridoxal phosphate binding); GO:0003824 (catalytic activity)	-2.32114	-4.30088	1.70119e-05	0.0016044
WBGene00012152	3565147		cnc-10	CaeNaCin (Caenorhabditis bacteriocin)	protein_coding		2.52148	4.2933	1.76036e-05	0.00164011
WBGene00001595	172532		gld-1	Female germline-specific tumor suppressor gld-1	protein_coding	GO:0006417 (regulation of translation); GO:0003727 (single-stranded RNA binding); GO:0003676 (nucleic acid binding); GO:0003723 (RNA binding)	-2.31754	-4.29343	1.75937e-05	0.00164011
WBGene00006310	183778		sul-3	SULfatase domain protein	protein_coding	GO:0008484 (sulfuric ester hydrolase activity); GO:0003824 (catalytic activity)	2.56987	4.29452	1.75071e-05	0.00164011
WBGene00007507	177767	95	C10C5.3	Aminoacylase	protein_coding	GO:0016787 (hydrolase activity); GO:0005737 (cytoplasm); GO:0006520 (cellular amino acid metabolic process); GO:0004046 (aminoacylase activity)	3.61236	4.29139	1.7756e-05	0.00164767
WBGene00019600	178961		rga-3	Rho GTPase Activating protein	protein_coding	GO:0007165 (signal transduction); GO:0043547 (positive regulation of GTPase activity); GO:0005938 (cell cortex); GO:0030866 (cortical actin cytoskeleton organization); GO:0005813 (centrosome); GO:0005096 (GTPase activator activity); GO:0045167 (asymmetric protein localization involved in cell fate determination); GO:0032970 (regulation of actin filament-based process)	-2.42084	-4.29031	1.78428e-05	0.0016491
WBGene00015698	172090		kca-1	Kinesin 1 cargo adaptor alternative variant a; Kinesin Cargo Adaptor	protein_coding	GO:0005515 (protein binding); GO:0009792 (embryo development ending in birth or egg hatching); GO:0019894 (kinesin binding); GO:0040038 (polar body extrusion after meiotic divisions); GO:0051295 (establishment of meiotic spindle localization); GO:0016938 (kinesin I complex)	-3.38705	-4.27301	1.92848e-05	0.00177528
WBGene00010223	186482		F58A3.3		protein_coding		2.44793	4.27159	1.94081e-05	0.00177954
WBGene00022034	171642		deps-1		protein_coding	GO:0005737 (cytoplasm); GO:0031047 (gene silencing by RNA); GO:0048471 (perinuclear region of cytoplasm); GO:0043186 (P granule)	-2.28091	-4.26827	1.96996e-05	0.00179205
WBGene00022814	179159		ZK742.4		protein_coding	GO:0003824 (catalytic activity); GO:0016491 (oxidoreductase activity); GO:0010181 (FMN binding); GO:0055114 (oxidation-reduction process)	2.42825	4.26886	1.96474e-05	0.00179205
WBGene00011087	179654		R07B7.2		protein_coding		-2.74039	-4.25536	2.08712e-05	0.00189118
WBGene00007931	179807		C34D1.4		protein_coding	GO:0016020 (membrane); GO:0016021 (integral component of membrane)	2.60961	4.25382	2.10158e-05	0.00189684
WBGene00007573	175473		C14B1.2		protein_coding	GO:0016020 (membrane); GO:0016021 (integral component of membrane)	-2.29971	-4.24943	2.14312e-05	0.0019156
WBGene00009393	174926		clec-62	C-type LECtin	protein_coding	GO:0045087 (innate immune response)	-2.85608	-4.2492	2.14536e-05	0.0019156
WBGene00004333	178295		rec-8	Meiotic recombination protein rec-8	protein_coding	GO:0005634 (nucleus); GO:0005737 (cytoplasm); GO:0003682 (chromatin binding); GO:0005856 (cytoskeleton); GO:0007062 (sister chromatid cohesion); GO:0008278 (cohesin complex); GO:0006281 (DNA repair); GO:0006974 (cellular response to DNA damage stimulus); GO:0005694 (chromosome); GO:0000795 (synaptonemal complex); GO:0051321 (meiotic cell cycle); GO:0030997 (regulation of centriole-centriole cohes…	-2.55885	-4.249	2.14724e-05	0.0019156
WBGene00004244	174197		puf-8	PUF (Pumilio/FBF) domain-containing	protein_coding	GO:0005634 (nucleus); GO:0005737 (cytoplasm); GO:0003723 (RNA binding); GO:0003730 (mRNA 3'-UTR binding); GO:0003729 (mRNA binding); GO:0007283 (spermatogenesis); GO:0006417 (regulation of translation); GO:0043186 (P granule); GO:0034399 (nuclear periphery); GO:0007140 (male meiotic nuclear division); GO:0043409 (negative regulation of MAPK cascade); GO:0010608 (posttranscriptional regulation of …	-2.55925	-4.24087	2.22656e-05	0.00197114
WBGene00022615	180776		ZC449.5		protein_coding	GO:0016020 (membrane); GO:0016021 (integral component of membrane)	2.79914	4.24134	2.22186e-05	0.00197114
WBGene00011746	177817		T13F2.6		protein_coding		-2.34307	-4.23259	2.31016e-05	0.00203735
WBGene00000083	181022		adt-2	A disintegrin and metalloproteinase with thrombospondin motifs adt-2	protein_coding	GO:0004222 (metalloendopeptidase activity); GO:0008237 (metallopeptidase activity); GO:0006508 (proteolysis); GO:0007229 (integrin-mediated signaling pathway); GO:0008340 (determination of adult lifespan); GO:0040018 (positive regulation of multicellular organism growth); GO:0008361 (regulation of cell size); GO:0030199 (collagen fibril organization); GO:0016787 (hydrolase activity); GO:0046872 (…	2.23049	4.23011	2.3358e-05	0.002052
WBGene00003553	181208		nas-37	Zinc metalloproteinase nas-37	protein_coding	GO:0018996 (molting cycle, collagen and cuticulin-based cuticle); GO:0004222 (metalloendopeptidase activity); GO:0008237 (metallopeptidase activity); GO:0006508 (proteolysis); GO:0008270 (zinc ion binding)	2.48722	4.22927	2.34453e-05	0.002052
WBGene00009216	185062		F28D1.6		protein_coding	GO:0016020 (membrane); GO:0016021 (integral component of membrane)	4.01926	4.22786	2.35924e-05	0.00205708
WBGene00022244	177404		Y73B6BL.23		protein_coding		-2.51802	-4.2267	2.37142e-05	0.00205992
WBGene00017692	184811		F22B7.1		protein_coding		2.33544	4.22105	2.43172e-05	0.00210439
WBGene00015073	178917		B0238.9		protein_coding		-2.73563	-4.21221	2.52887e-05	0.0021803
WBGene00009500	185381	3075	F36H2.3		protein_coding		2.32997	4.20971	2.55702e-05	0.00219637
WBGene00008737	184414		gnrr-7	GoNadotropin-Releasing hormone Receptor (GnRHR) related	protein_coding	GO:0016020 (membrane); GO:0016021 (integral component of membrane); GO:0004930 (G protein-coupled receptor activity); GO:0007165 (signal transduction); GO:0007186 (G protein-coupled receptor signaling pathway)	3.04275	4.20714	2.58621e-05	0.00221322
WBGene00001768	175008	27306	gst-20	Glutathione S-Transferase	protein_coding	GO:0016740 (transferase activity); GO:0006749 (glutathione metabolic process); GO:0004364 (glutathione transferase activity); GO:0005737 (cytoplasm); GO:0008340 (determination of adult lifespan); GO:0005515 (protein binding)	2.27445	4.20595	2.5999e-05	0.00221673
WBGene00007773	181582		C27C12.3		protein_coding		-3.64791	-4.19664	2.70909e-05	0.00230133
WBGene00012253	180299		clec-50	C-type LECtin	protein_coding	GO:0038023 (signaling receptor activity); GO:0030246 (carbohydrate binding)	-2.17474	-4.19113	2.77567e-05	0.00234926
WBGene00002144	171929		inx-22	Innexin	protein_coding	GO:0016020 (membrane); GO:0016021 (integral component of membrane); GO:0055085 (transmembrane transport); GO:0005886 (plasma membrane); GO:0006811 (ion transport); GO:0030054 (cell junction); GO:0005921 (gap junction); GO:0005243 (gap junction channel activity); GO:1900194 (negative regulation of oocyte maturation)	-2.33048	-4.18237	2.88489e-05	0.00243027
WBGene00044067	178509		zipt-7.1	Zinc transporter zipt-7.1	protein_coding	GO:0016020 (membrane); GO:0016021 (integral component of membrane); GO:0006811 (ion transport); GO:0055085 (transmembrane transport); GO:0005515 (protein binding); GO:0005385 (zinc ion transmembrane transporter activity); GO:0071577 (zinc ion transmembrane transport); GO:0046662 (regulation of oviposition); GO:0030001 (metal ion transport); GO:0046873 (metal ion transmembrane transporter activity…	-2.40725	-4.18177	2.89242e-05	0.00243027
WBGene00013894	172907		ZC434.8	Probable arginine kinase ZC434.8	protein_coding	GO:0003824 (catalytic activity); GO:0016301 (kinase activity); GO:0016310 (phosphorylation); GO:0000166 (nucleotide binding); GO:0016740 (transferase activity); GO:0005524 (ATP binding); GO:0016772 (transferase activity, transferring phosphorus-containing groups); GO:0004054 (arginine kinase activity); GO:0004111 (creatine kinase activity); GO:0046314 (phosphocreatine biosynthetic process)	-2.25468	-4.17586	2.96867e-05	0.00248529
WBGene00019376	179046	3988	lipl-4	Lipase	protein_coding	GO:0016787 (hydrolase activity); GO:0006629 (lipid metabolic process); GO:0016042 (lipid catabolic process); GO:0016788 (hydrolase activity, acting on ester bonds); GO:0005764 (lysosome); GO:0043202 (lysosomal lumen); GO:0004806 (triglyceride lipase activity); GO:0005737 (cytoplasm); GO:0010508 (positive regulation of autophagy); GO:0008340 (determination of adult lifespan); GO:0016239 (positive …	-5.87922	-4.1724	3.01412e-05	0.00251423
WBGene00019426	174065		cutl-16	CUTiclin-Like	protein_coding	GO:0016020 (membrane); GO:0016021 (integral component of membrane)	2.29333	4.1442	3.40996e-05	0.00283162
WBGene00014113	179421		hpo-40		protein_coding	GO:0005737 (cytoplasm); GO:0048471 (perinuclear region of cytoplasm); GO:1990633 (mutator focus)	-2.67927	-4.14359	3.41912e-05	0.00283162
WBGene00000386	172353		cdc-25.1	M-phase inducer phosphatase cdc-25.1	protein_coding	GO:1902751 (positive regulation of cell cycle G2/M phase transition); GO:0006470 (protein dephosphorylation); GO:0004725 (protein tyrosine phosphatase activity)	-2.18083	-4.13971	3.47748e-05	0.00285877
WBGene00001686	174578	2597	gpd-4	Glyceraldehyde-3-phosphate dehydrogenase 4	protein_coding	GO:0006006 (glucose metabolic process); GO:0050661 (NADP binding); GO:0051287 (NAD binding); GO:0016620 (oxidoreductase activity, acting on the aldehyde or oxo group of donors, NAD or NADP as acceptor); GO:0055114 (oxidation-reduction process)	-2.24087	-4.13895	3.48903e-05	0.00285877
WBGene00045265	6418859		K10C2.8		protein_coding		2.13934	4.14041	3.46679e-05	0.00285877
WBGene00019090	178682		F59A7.2		protein_coding	GO:0050829 (defense response to Gram-negative bacterium)	2.82095	4.13447	3.55777e-05	0.0029048
WBGene00016207	183002	2581	C29E4.10	Putative galactocerebrosidase	protein_coding	GO:0005764 (lysosome); GO:0003824 (catalytic activity); GO:0008152 (metabolic process); GO:0016787 (hydrolase activity); GO:0016798 (hydrolase activity, acting on glycosyl bonds); GO:0006629 (lipid metabolic process); GO:0016042 (lipid catabolic process); GO:0006665 (sphingolipid metabolic process); GO:0004336 (galactosylceramidase activity); GO:0006683 (galactosylceramide catabolic process)	-2.26531	-4.12236	3.75016e-05	0.00303715
WBGene00018911	186346		F56A4.3		protein_coding	GO:0005829 (cytosol); GO:0006749 (glutathione metabolic process); GO:0004364 (glutathione transferase activity); GO:0005515 (protein binding)	-197.711	-4.12281	3.74285e-05	0.00303715
WBGene00003514	181404	57644	myo-2	Myosin-2	protein_coding	GO:0016459 (myosin complex); GO:0003774 (motor activity); GO:0051015 (actin filament binding); GO:0005524 (ATP binding)	2.76446	4.1218	3.7593e-05	0.00303715
WBGene00013381	13198891		cyp-31A5	CYtochrome P450 family	protein_coding	GO:0004497 (monooxygenase activity); GO:0020037 (heme binding); GO:0005506 (iron ion binding); GO:0016705 (oxidoreductase activity, acting on paired donors, with incorporation or reduction of molecular oxygen); GO:0055114 (oxidation-reduction process)	-3.36278	-4.11415	3.88606e-05	0.00312861
WBGene00019608	174055		ani-2	Anillin-like protein 2	protein_coding		-2.27408	-4.10573	4.03043e-05	0.00322339
WBGene00011505	188142		pzf-1	Paired Zinc Finger protein	protein_coding	GO:0005634 (nucleus); GO:0043565 (sequence-specific DNA binding); GO:0000981 (DNA-binding transcription factor activity, RNA polymerase II-specific); GO:0006357 (regulation of transcription by RNA polymerase II); GO:0045132 (meiotic chromosome segregation); GO:0051446 (positive regulation of meiotic cell cycle)	-3.6411	-4.10566	4.03168e-05	0.00322339
WBGene00015710	182538		C12D5.9		protein_coding		3.04451	4.09381	4.24336e-05	0.00337287
WBGene00022452	173639		Y110A2AR.1	Receptor expression-enhancing protein	protein_coding	GO:0016020 (membrane); GO:0016021 (integral component of membrane)	-2.31833	-4.09357	4.24784e-05	0.00337287
WBGene00003784	174158		nos-2	NanOS related	protein_coding	GO:0003723 (RNA binding); GO:0008270 (zinc ion binding); GO:0003729 (mRNA binding); GO:0017148 (negative regulation of translation); GO:0006417 (regulation of translation); GO:0048471 (perinuclear region of cytoplasm); GO:0005737 (cytoplasm); GO:0007281 (germ cell development); GO:0048477 (oogenesis); GO:0051726 (regulation of cell cycle)	-2.30421	-4.09042	4.30599e-05	0.00339571
WBGene00044350	3565715		Y73B6BL.44		protein_coding		2.34248	4.09059	4.30271e-05	0.00339571
WBGene00014183	191492		ZK1025.3		protein_coding	GO:0016020 (membrane); GO:0016021 (integral component of membrane)	39.3217	4.08029	4.49789e-05	0.00353498
WBGene00001789	179127		gst-41	Glutathione S-Transferase	protein_coding	GO:0016740 (transferase activity); GO:0005829 (cytosol); GO:0006749 (glutathione metabolic process); GO:0004364 (glutathione transferase activity); GO:0005515 (protein binding)	3.18394	4.07668	4.56837e-05	0.00357819
WBGene00007171	181957		B0393.6		protein_coding	GO:0046872 (metal ion binding)	-2.62575	-4.07172	4.66668e-05	0.00364285
WBGene00018384	173591		F43C11.7		protein_coding	GO:0046872 (metal ion binding); GO:0008270 (zinc ion binding); GO:0008340 (determination of adult lifespan); GO:0050830 (defense response to Gram-positive bacterium)	-2.38649	-4.06997	4.70197e-05	0.00365446
WBGene00009805	179930		F47B8.4		protein_coding	GO:0005634 (nucleus); GO:0006879 (cellular iron ion homeostasis); GO:0005829 (cytosol); GO:0015035 (protein disulfide oxidoreductase activity); GO:0045087 (innate immune response)	-3.89299	-4.06801	4.74165e-05	0.00365446
WBGene00020550	175228		T17H7.1		protein_coding		2.54902	4.06814	4.7389e-05	0.00365446
WBGene00018698	179223		vha-18	Probable V-type proton ATPase subunit H 1	protein_coding	GO:0006811 (ion transport); GO:1902600 (proton transmembrane transport); GO:0000221 (vacuolar proton-transporting V-type ATPase, V1 domain); GO:0046961 (proton-transporting ATPase activity, rotational mechanism)	-2.61918	-4.06785	4.74481e-05	0.00365446
WBGene00018600	185976		F48C1.8		protein_coding		2.90249	4.05508	5.01175e-05	0.00384386
WBGene00018602	180697		F48D6.4		protein_coding		-2.49725	-4.05376	5.04019e-05	0.00384386
WBGene00021625	178841		Y47D7A.13		protein_coding		-3.76239	-4.05296	5.05727e-05	0.00384386
WBGene00013419	190478		Y65A5A.2		protein_coding	GO:0016020 (membrane); GO:0016021 (integral component of membrane)	-2.57433	-4.0531	5.05441e-05	0.00384386
WBGene00020290	173682		T06D4.1		protein_coding		-2.47266	-4.05095	5.10109e-05	0.00386445
WBGene00017184	180418	4684	ncam-1	NCAM (Neural cell adhesion molecule) homolog	protein_coding	GO:0016020 (membrane); GO:0016021 (integral component of membrane); GO:0005886 (plasma membrane); GO:0007155 (cell adhesion); GO:0007156 (homophilic cell adhesion via plasma membrane adhesion molecules); GO:0007411 (axon guidance); GO:0030424 (axon); GO:0070593 (dendrite self-avoidance); GO:0098632 (cell-cell adhesion mediator activity); GO:0005515 (protein binding)	2.47475	4.03855	5.37831e-05	0.00406115
WBGene00001601	171941		glh-4	ATP-dependent RNA helicase glh-4	protein_coding	GO:0004386 (helicase activity); GO:0003676 (nucleic acid binding); GO:0005524 (ATP binding); GO:0008270 (zinc ion binding)	-2.40938	-4.03765	5.39888e-05	0.00406341
WBGene00018948	176036		F56C9.3		protein_coding	GO:0016020 (membrane); GO:0016021 (integral component of membrane); GO:0098655 (cation transmembrane transport); GO:0055085 (transmembrane transport); GO:0006812 (cation transport); GO:0008324 (cation transmembrane transporter activity); GO:0006829 (zinc ion transport)	-2.26378	-4.02971	5.58467e-05	0.00418959
WBGene00001683	174603	2597	gpd-1	Glyceraldehyde-3-phosphate dehydrogenase 1	protein_coding	GO:0006006 (glucose metabolic process); GO:0050661 (NADP binding); GO:0051287 (NAD binding); GO:0016620 (oxidoreductase activity, acting on the aldehyde or oxo group of donors, NAD or NADP as acceptor); GO:0055114 (oxidation-reduction process)	-2.12954	-4.02883	5.6055e-05	0.00419161
WBGene00008978	184721		cutl-3	CUTiclin-Like	protein_coding	GO:0016020 (membrane); GO:0016021 (integral component of membrane)	2.58677	4.02712	5.64636e-05	0.00419501
WBGene00010263	174932		wago-4	Piwi-like protein	protein_coding	GO:0005737 (cytoplasm); GO:0003676 (nucleic acid binding); GO:0003723 (RNA binding); GO:0031047 (gene silencing by RNA); GO:0048471 (perinuclear region of cytoplasm); GO:0031048 (heterochromatin assembly by small RNA); GO:0060966 (regulation of gene silencing by RNA); GO:0005515 (protein binding)	-2.29558	-4.02724	5.64349e-05	0.00419501
WBGene00016263	172429		C30F12.4		protein_coding		-2.48537	-4.01953	5.83136e-05	0.00431857
WBGene00015912	173669		fbxc-50	F-box C protein	protein_coding		-2.40885	-4.01832	5.86142e-05	0.00432697
WBGene00010865	187446		M04D8.7		protein_coding	GO:0016020 (membrane); GO:0016021 (integral component of membrane)	3.86988	4.01681	5.89901e-05	0.00434085
WBGene00000287	177143		cal-3	CALmodulin related genes	protein_coding	GO:0005509 (calcium ion binding); GO:0050790 (regulation of catalytic activity); GO:0030234 (enzyme regulator activity)	2.51649	4.00861	6.10767e-05	0.00446595
WBGene00011019	187594		R05A10.2		protein_coding		2.93717	4.00864	6.10705e-05	0.00446595
WBGene00044174	3565026		fipr-5	FIP (Fungus-Induced Protein) Related	protein_coding		2.24472	4.00517	6.19738e-05	0.00451725
WBGene00021797	190188		plep-1	PLugged Excretory Pore	protein_coding	GO:0016020 (membrane); GO:0016021 (integral component of membrane)	3.68539	4.00337	6.24475e-05	0.00453746
WBGene00009400	174930		F35C5.12		protein_coding	GO:0006952 (defense response)	2.24891	3.99955	6.34629e-05	0.00459678
WBGene00001608	187649		R07B1.8		protein_coding		5.34553	3.99025	6.60045e-05	0.00476593
WBGene00009626	174481		F42A8.1		protein_coding		2.1337	3.98478	6.75417e-05	0.00483933
WBGene00045338	13216887	84457	M01B2.13		protein_coding	GO:0005737 (cytoplasm)	-4.63496	-3.98441	6.76493e-05	0.00483933
WBGene00019247	172411		syp-4	Synaptonemal complex protein 4	protein_coding	GO:0005694 (chromosome); GO:0051321 (meiotic cell cycle); GO:0005515 (protein binding); GO:0000794 (condensed nuclear chromosome); GO:0000801 (central element)	-2.37777	-3.98528	6.7401e-05	0.00483933
WBGene00001977	174829		hmg-12	HMG; High mobility group protein I beta	protein_coding	GO:0005634 (nucleus); GO:0003677 (DNA binding); GO:0010628 (positive regulation of gene expression); GO:0006355 (regulation of transcription, DNA-templated); GO:0003712 (transcription coregulator activity); GO:0000979 (RNA polymerase II core promoter sequence-specific DNA binding)	-2.09987	-3.97907	6.91855e-05	0.00493395
WBGene00000599	179298		col-10	Cuticle collagen 10	protein_coding	GO:0042302 (structural constituent of cuticle)	2.57198	3.97573	7.01638e-05	0.00498833
WBGene00018340	175868		anmt-2	Amine N-MethylTransferase	protein_coding	GO:0008168 (methyltransferase activity); GO:0032259 (methylation); GO:0016740 (transferase activity); GO:0005829 (cytosol); GO:0008170 (N-methyltransferase activity)	2.22389	3.97335	7.08685e-05	0.00500761
WBGene00003497	176060		mup-4	Transmembrane matrix receptor MUP-4	protein_coding	GO:0005509 (calcium ion binding)	2.09612	3.97387	7.07144e-05	0.00500761
WBGene00012301	189243		W06D11.3		protein_coding		-2.98804	-3.96273	7.40986e-05	0.00521989
WBGene00016501	179164		C37C3.9		protein_coding	GO:0005515 (protein binding)	-2.1813	-3.95826	7.54983e-05	0.00530232
WBGene00010513	186895		K02E11.4		protein_coding		2.56598	3.94933	7.83692e-05	0.00548727
WBGene00011597	3565259		zim-1	Zinc finger In Meiosis	protein_coding	GO:0000794 (condensed nuclear chromosome); GO:0045132 (meiotic chromosome segregation)	-2.68154	-3.94749	7.89747e-05	0.00551296
WBGene00009651			F43D2.2		pseudogene		-3.52973	-3.94482	7.98611e-05	0.00555804
WBGene00015591	176092		cyk-7	Cytokinesis defective protein 7	protein_coding	GO:0005515 (protein binding)	-2.36506	-3.94152	8.09652e-05	0.00561796
WBGene00008210	181372		C49F5.6		protein_coding		-2.51904	-3.93337	8.37646e-05	0.00577751
WBGene00001188	177821	51384	egl-20	Wnt homolog	protein_coding	GO:0005576 (extracellular region); GO:0005615 (extracellular space); GO:0007275 (multicellular organism development); GO:0016055 (Wnt signaling pathway); GO:0060070 (canonical Wnt signaling pathway); GO:0000132 (establishment of mitotic spindle orientation); GO:0001764 (neuron migration); GO:0070986 (left/right axis specification); GO:0097402 (neuroblast migration); GO:0097475 (motor neuron migra…	2.09752	3.93344	8.37375e-05	0.00577751
WBGene00002050	181316	84823	ifa-1	Intermediate filament protein ifa-1	protein_coding		2.08326	3.93067	8.47085e-05	0.00582522
WBGene00013585	180236		cyp-42A1	CYtochrome P450 family	protein_coding	GO:0016020 (membrane); GO:0016021 (integral component of membrane); GO:0046872 (metal ion binding); GO:0016491 (oxidoreductase activity); GO:0004497 (monooxygenase activity); GO:0020037 (heme binding); GO:0005506 (iron ion binding); GO:0016705 (oxidoreductase activity, acting on paired donors, with incorporation or reduction of molecular oxygen); GO:0055114 (oxidation-reduction process)	2.20278	3.92915	8.52449e-05	0.00584472
WBGene00017263	178925		F08F3.6		protein_coding	GO:0005515 (protein binding)	-2.28286	-3.92669	8.61246e-05	0.00588756
WBGene00004972	177929		spe-26	Spermatocyte protein spe-26	protein_coding	GO:0005737 (cytoplasm); GO:0005856 (cytoskeleton); GO:0003779 (actin binding); GO:0005515 (protein binding)	-2.42666	-3.92013	8.85021e-05	0.00603224
WBGene00021675	24105124		Y48G1BR.1		protein_coding	GO:0016020 (membrane); GO:0016021 (integral component of membrane)	2.30143	3.91885	8.89739e-05	0.00604656
WBGene00019563	187204		K09C6.9		protein_coding		3.67126	3.91324	9.10678e-05	0.00617071
WBGene00219375	13221698		C02B8.12		protein_coding		2.64738	3.91216	9.14748e-05	0.00618017
WBGene00008005	175635		C38D4.4		protein_coding		-2.47653	-3.90371	9.47276e-05	0.00638127
WBGene00015794	182638		C15F1.1		protein_coding		2.75617	3.90069	9.59182e-05	0.00644269
WBGene00007820	183064		clec-199	C-type LECtin	protein_coding	GO:0030246 (carbohydrate binding)	2.52096	3.89465	9.83391e-05	0.00655064
WBGene00000969	173930		dhs-5	Uncharacterized oxidoreductase dhs-5	protein_coding	GO:0055114 (oxidation-reduction process)	2.18274	3.89387	9.86594e-05	0.00655064
WBGene00044175	3565930		fipr-9	FIP (Fungus-Induced Protein) Related	protein_coding		2.51341	3.89428	9.84898e-05	0.00655064
WBGene00001647	172533	64841	gna-2	Glucosamine phosphate N-Acetyl transferase; Phosphoglucosamine acetyltransferase	protein_coding	GO:0016740 (transferase activity); GO:0016746 (transferase activity, transferring acyl groups); GO:0005794 (Golgi apparatus); GO:0005783 (endoplasmic reticulum); GO:0008080 (N-acetyltransferase activity); GO:0004343 (glucosamine 6-phosphate N-acetyltransferase activity); GO:0006048 (UDP-N-acetylglucosamine biosynthetic process); GO:0005793 (endoplasmic reticulum-Golgi intermediate compartment); G…	-2.20141	-3.89529	9.80807e-05	0.00655064
WBGene00017843	178888		F26G5.1		protein_coding		-2.60799	-3.8897	0.000100368	0.00664498
WBGene00013489	180218		col-42	COLlagen	protein_coding	GO:0016020 (membrane); GO:0016021 (integral component of membrane); GO:0042302 (structural constituent of cuticle)	2.13726	3.88071	0.000104153	0.00687589
WBGene00007969	175500	55902	acs-19	Acetyl-coenzyme A synthetase	protein_coding	GO:0000166 (nucleotide binding); GO:0016874 (ligase activity); GO:0005524 (ATP binding); GO:0032436 (positive regulation of proteasomal ubiquitin-dependent protein catabolic process); GO:1902882 (regulation of response to oxidative stress); GO:0003987 (acetate-CoA ligase activity); GO:0016208 (AMP binding); GO:0019427 (acetyl-CoA biosynthetic process from acetate)	-2.04719	-3.87991	0.000104496	0.00687889
WBGene00044132	3565519		C23H4.8		protein_coding		3.46067	3.87857	0.000105073	0.00689719
WBGene00011834	179554		dvc-1	SprT-like domain-containing protein Spartan	protein_coding	GO:0005634 (nucleus); GO:0016787 (hydrolase activity); GO:0003677 (DNA binding); GO:0046872 (metal ion binding); GO:0004222 (metalloendopeptidase activity); GO:0006508 (proteolysis); GO:0008233 (peptidase activity); GO:0008237 (metallopeptidase activity); GO:0006281 (DNA repair); GO:0006974 (cellular response to DNA damage stimulus); GO:0005694 (chromosome); GO:0031593 (polyubiquitin modification…	-2.15805	-3.8752	0.000106539	0.00697362
WBGene00001609	176286		glp-1		protein_coding	GO:0007219 (Notch signaling pathway); GO:0030154 (cell differentiation); GO:0007275 (multicellular organism development); GO:0005509 (calcium ion binding); GO:0016021 (integral component of membrane); GO:0005515 (protein binding)	-2.12473	-3.87439	0.000106891	0.00697689
WBGene00010057	174770		F54D5.15		protein_coding		2.78828	3.87166	0.000108097	0.00701596
WBGene00022093	190543		Y69A2AR.22		protein_coding		2.47861	3.87179	0.000108038	0.00701596
WBGene00001456	177547		flp-13	FMRFamide-like neuropeptides 13 SDRPTRAMDSPLIRF-amide AMDSPLIRF-amide AADGAPLIRF-amide 1 APEASPFIRF-amide 1 AADGAPLIRF-amide 2 APEASPFIRF-amide 2 ASPSAPLIRF-amide SPSAVPLIRF-amide SAAAPLIRF-amide ASSAPLIRF-amide	protein_coding	GO:0007218 (neuropeptide signaling pathway)	2.40012	3.86841	0.000109549	0.00709028
WBGene00013431	176591		ceh-92	C. Elegans Homeobox	protein_coding	GO:0003677 (DNA binding)	-2.76389	-3.86597	0.000110648	0.00710175
WBGene00006562	174327		tdc-1	Tyrosine decarboxylase	protein_coding	GO:0005737 (cytoplasm); GO:0003824 (catalytic activity); GO:0016829 (lyase activity); GO:0030170 (pyridoxal phosphate binding); GO:0042995 (cell projection); GO:0019752 (carboxylic acid metabolic process); GO:0016831 (carboxy-lyase activity); GO:0006520 (cellular amino acid metabolic process); GO:0030424 (axon); GO:0043204 (perikaryon); GO:0004837 (tyrosine decarboxylase activity); GO:0043025 (ne…	-2.08471	-3.86601	0.000110631	0.00710175
WBGene00013862	179489		wdr-5.3	WD repeat-containing protein wdr-5.3	protein_coding	GO:0044666 (MLL3/4 complex); GO:0005515 (protein binding)	-2.30915	-3.8661	0.000110592	0.00710175
WBGene00010367	172577		H05L14.2		protein_coding	GO:0046872 (metal ion binding)	-2.44937	-3.86285	0.000112071	0.00716592
WBGene00006586	177295		tni-4	Troponin I 4	protein_coding	GO:0003779 (actin binding); GO:0005861 (troponin complex); GO:0006936 (muscle contraction); GO:0009792 (embryo development ending in birth or egg hatching); GO:0030017 (sarcomere); GO:0043050 (pharyngeal pumping); GO:0030172 (troponin C binding)	2.22966	3.86242	0.000112268	0.00716592
WBGene00009547	185479		F38H4.3		protein_coding		2.52313	3.85439	0.00011602	0.00738504
WBGene00014252	174520		ZK1320.2		protein_coding	GO:0045087 (innate immune response)	-2.20091	-3.84439	0.000120851	0.0076714
WBGene00001730	177967		grl-21	GRound-Like (Grd related)	protein_coding		-71.1741	-3.84266	0.00012171	0.00770475
WBGene00004027	176667		pie-1	Pharynx and intestine in excess protein 1	protein_coding	GO:0046872 (metal ion binding)	-2.24683	-3.83916	0.000123458	0.00777281
WBGene00021763	245998		Y51F10.2		protein_coding	GO:0046872 (metal ion binding)	-2.11237	-3.83972	0.000123175	0.00777281
WBGene00000677	176901		col-103	COLlagen	protein_coding	GO:0042302 (structural constituent of cuticle)	2.17079	3.83743	0.000124326	0.00780621
WBGene00021160	177314	2629	gba-4	Putative glucosylceramidase 4	protein_coding	GO:0006665 (sphingolipid metabolic process); GO:0004348 (glucosylceramidase activity)	-4.48847	-3.83443	0.000125855	0.00788078
WBGene00009995	179846		F53F4.13		protein_coding		2.12065	3.83088	0.000127684	0.00793827
WBGene00003090	179428		lys-1	Lysozyme-like protein 1	protein_coding	GO:0009253 (peptidoglycan catabolic process); GO:0003796 (lysozyme activity); GO:0016998 (cell wall macromolecule catabolic process)	-2.26157	-3.83065	0.000127804	0.00793827
WBGene00006619	173856	5340	try-1	TRYpsin-like protease	protein_coding	GO:0016787 (hydrolase activity); GO:0006508 (proteolysis); GO:0008233 (peptidase activity); GO:0004252 (serine-type endopeptidase activity); GO:0008236 (serine-type peptidase activity)	-2.23734	-3.8318	0.000127209	0.00793827
WBGene00009577	174704		F40F8.4		protein_coding		2.1782	3.82541	0.000130557	0.00807497
WBGene00001862	177462		him-3	High Incidence of Males (Increased X chromosome loss); Meiotic chromosome core protein	protein_coding	GO:0005694 (chromosome); GO:0030997 (regulation of centriole-centriole cohesion); GO:0000794 (condensed nuclear chromosome); GO:0003677 (DNA binding); GO:0007062 (sister chromatid cohesion); GO:0007130 (synaptonemal complex assembly); GO:0045143 (homologous chromosome segregation); GO:0000800 (lateral element)	-2.31402	-3.82513	0.000130704	0.00807497
WBGene00015899	178801		C17E7.4		protein_coding	GO:0005515 (protein binding)	-2.27853	-3.82316	0.000131751	0.00811797
WBGene00022854	191525		cin-4	DNA topoisomerase-like protein cin-4	protein_coding	GO:0006259 (DNA metabolic process); GO:0003918 (DNA topoisomerase type II (double strand cut, ATP-hydrolyzing) activity); GO:0006265 (DNA topological change); GO:0005524 (ATP binding); GO:0003677 (DNA binding)	-3.12653	-3.82173	0.000132521	0.00814368
WBGene00021038	171909		W05F2.6		protein_coding		-2.24464	-3.81523	0.000136054	0.00833861
WBGene00008739	174797		F13D12.3		protein_coding		2.0553	3.81235	0.000137653	0.00841429
WBGene00022490	175283		Y119D3B.13		protein_coding		-3.34363	-3.80324	0.000142817	0.00868405
WBGene00017755	175924		zip-8	bZIP transcription factor 8	protein_coding	GO:0003700 (DNA-binding transcription factor activity); GO:0006355 (regulation of transcription, DNA-templated)	2.25626	3.80353	0.00014265	0.00868405
WBGene00021624	189988		Y47D7A.12		protein_coding		3.44103	3.80048	0.000144417	0.00875828
WBGene00000772	172244		cpb-3	Cytoplasmic polyadenylation element-binding protein 3	protein_coding	GO:0045182 (translation regulator activity); GO:0003730 (mRNA 3'-UTR binding); GO:0006417 (regulation of translation); GO:0003676 (nucleic acid binding)	-2.10602	-3.79814	0.000145783	0.00881798
WBGene00002034	172099		htp-3	Him-Three Paralog	protein_coding	GO:0000785 (chromatin); GO:0000793 (condensed chromosome); GO:0000800 (lateral element); GO:0007129 (homologous chromosome pairing at meiosis); GO:0042138 (meiotic DNA double-strand break formation)	-2.27958	-3.79584	0.000147144	0.00887706
WBGene00014091	178125		ZK822.4		protein_coding		2.005	3.793	0.00014884	0.00895599
WBGene00206388	13221059		K10C2.14		protein_coding		2.44072	3.79024	0.0001505	0.00903236
WBGene00019198	175358		strm-1	Sterol 4-C-methyltransferase strm-1	protein_coding	GO:0008168 (methyltransferase activity); GO:0032259 (methylation); GO:0016740 (transferase activity); GO:0005783 (endoplasmic reticulum); GO:0006629 (lipid metabolic process); GO:0016126 (sterol biosynthetic process); GO:0008202 (steroid metabolic process); GO:0008203 (cholesterol metabolic process); GO:0003838 (sterol 24-C-methyltransferase activity); GO:0061065 (regulation of dauer larval devel…	3.00381	3.78716	0.00015238	0.00905686
WBGene00020593	178882		ugt-11	UDP-GlucuronosylTransferase	protein_coding	GO:0016020 (membrane); GO:0016021 (integral component of membrane); GO:0016740 (transferase activity); GO:0043231 (intracellular membrane-bounded organelle); GO:0015020 (glucuronosyltransferase activity); GO:0016757 (transferase activity, transferring glycosyl groups); GO:0008194 (UDP-glycosyltransferase activity)	3.09331	3.7872	0.000152353	0.00905686
WBGene00013103	178460	131669	Y51H4A.7	Probable urocanate hydratase	protein_coding	GO:0016829 (lyase activity); GO:0006547 (histidine metabolic process); GO:0006548 (histidine catabolic process); GO:0019556 (histidine catabolic process to glutamate and formamide); GO:0019557 (histidine catabolic process to glutamate and formate); GO:0016153 (urocanate hydratase activity)	2.01278	3.787	0.000152476	0.00905686
WBGene00012421	189405		Y9C2UA.1		protein_coding	GO:0016020 (membrane); GO:0016021 (integral component of membrane); GO:0005886 (plasma membrane)	2.43933	3.78891	0.000151308	0.00905686
WBGene00003795	175443		npp-9	Nuclear Pore complex Protein	protein_coding	GO:0005737 (cytoplasm); GO:0046872 (metal ion binding); GO:0005096 (GTPase activator activity); GO:0043547 (positive regulation of GTPase activity); GO:0005643 (nuclear pore); GO:0046907 (intracellular transport); GO:0005515 (protein binding); GO:0009792 (embryo development ending in birth or egg hatching); GO:0006997 (nucleus organization)	-1.97985	-3.7845	0.000154016	0.00912485
WBGene00009606	179928		F40G12.11		protein_coding		-2.38226	-3.78311	0.000154882	0.0091527
WBGene00016627	174124		C44B7.5		protein_coding	GO:0005576 (extracellular region)	-2.60629	-3.78189	0.000155645	0.00917431
WBGene00000169	174190	89872	aqp-1	AQuaPorin or aquaglyceroporin related	protein_coding	GO:0016020 (membrane); GO:0016021 (integral component of membrane); GO:0055085 (transmembrane transport); GO:0015267 (channel activity); GO:0045087 (innate immune response); GO:0050829 (defense response to Gram-negative bacterium); GO:0016323 (basolateral plasma membrane); GO:0015793 (glycerol transport)	-2.37688	-3.77989	0.000156897	0.00920115
WBGene00020323	188239		arrd-23	ARRestin Domain protein	protein_coding	GO:0005737 (cytoplasm); GO:0015031 (protein transport)	2.38651	3.78016	0.000156729	0.00920115
WBGene00017532	184599		ent-5	Equilibrative Nucleoside Transporter	protein_coding	GO:0016020 (membrane); GO:0016021 (integral component of membrane); GO:0005886 (plasma membrane); GO:0005337 (nucleoside transmembrane transporter activity); GO:1901642 (nucleoside transmembrane transport)	-2.86619	-3.77597	0.000159386	0.00932346
WBGene00020891	179017		T28C12.4	Carboxylic ester hydrolase	protein_coding	GO:0016787 (hydrolase activity); GO:0005615 (extracellular space); GO:0052689 (carboxylic ester hydrolase activity); GO:0005575 (cellular_component); GO:0008150 (biological_process)	2.10185	3.76928	0.000163717	0.00955263
WBGene00013931	191214		clec-97	C-type LECtin	protein_coding	GO:0030246 (carbohydrate binding)	2.70451	3.76052	0.000169563	0.0098688
WBGene00016319	174053		C32D5.12		protein_coding	GO:0016491 (oxidoreductase activity); GO:0016616 (oxidoreductase activity, acting on the CH-OH group of donors, NAD or NADP as acceptor); GO:0003854 (3-beta-hydroxy-delta5-steroid dehydrogenase activity); GO:0006694 (steroid biosynthetic process); GO:0055114 (oxidation-reduction process)	2.25672	3.74149	0.00018293	0.0106201
WBGene00010887	187458		M7.12		protein_coding	GO:0005737 (cytoplasm); GO:0008080 (N-acetyltransferase activity)	2.13994	3.73827	0.000185293	0.0107034
WBGene00006977	176274		zif-1	Zinc finger-interacting factor 1	protein_coding	GO:0016567 (protein ubiquitination); GO:0007275 (multicellular organism development); GO:0005515 (protein binding); GO:0009792 (embryo development ending in birth or egg hatching); GO:0006511 (ubiquitin-dependent protein catabolic process)	-2.09843	-3.73866	0.000185006	0.0107034
WBGene00001481	171895		fog-1	Feminization Of Germline	protein_coding	GO:0005634 (nucleus); GO:0005737 (cytoplasm); GO:0043005 (neuron projection); GO:0003676 (nucleic acid binding); GO:0003723 (RNA binding); GO:0045202 (synapse); GO:0000900 (translation repressor activity, mRNA regulatory element binding); GO:0003730 (mRNA 3'-UTR binding); GO:0006412 (translation); GO:0006417 (regulation of translation); GO:0008135 (translation factor activity, RNA binding); GO:00…	-2.91941	-3.73675	0.000186417	0.0107415
WBGene00007807	180036		C29F3.7		protein_coding	GO:0045087 (innate immune response); GO:0045121 (membrane raft)	3.05522	3.72673	0.000193979	0.0111425
WBGene00003422	171914	2956	msh-6	MSH (MutS Homolog) family	protein_coding	GO:0005524 (ATP binding); GO:0000166 (nucleotide binding); GO:0003677 (DNA binding); GO:0006298 (mismatch repair); GO:0030983 (mismatched DNA binding); GO:0006281 (DNA repair); GO:0006974 (cellular response to DNA damage stimulus); GO:0032300 (mismatch repair complex); GO:0008094 (DNA-dependent ATPase activity); GO:0045910 (negative regulation of DNA recombination); GO:0000400 (four-way junction …	-2.07732	-3.72626	0.000194341	0.0111425
WBGene00015278	177427		C01B10.3		protein_coding	GO:0016787 (hydrolase activity); GO:0004445 (inositol-polyphosphate 5-phosphatase activity); GO:0046855 (inositol phosphate dephosphorylation); GO:0048016 (inositol phosphate-mediated signaling)	2.12908	3.72239	0.000197344	0.0112867
WBGene00044998	4927032		M199.9		protein_coding		2.47866	3.71661	0.000201916	0.0115003
WBGene00021832	171894		Y54E10A.12		protein_coding		-2.56911	-3.71641	0.000202075	0.0115003
WBGene00020760	188845		T24C4.4		protein_coding	GO:0016020 (membrane); GO:0016021 (integral component of membrane); GO:0045087 (innate immune response)	-3.36363	-3.71244	0.000205268	0.0116534
WBGene00001387	179785		far-3	Fatty Acid/Retinol binding protein	protein_coding	GO:0005576 (extracellular region); GO:0008289 (lipid binding)	1.99969	3.71022	0.000207082	0.0117276
WBGene00020155	178592		T02B11.3		protein_coding		2.01169	3.70748	0.000209328	0.0118258
WBGene00018258	180953		F41B4.2		protein_coding		2.22264	3.70631	0.000210305	0.011852
WBGene00011741	178138		T12G3.6		protein_coding		-2.04789	-3.70553	0.000210952	0.0118595
WBGene00002011	176148		hsp-12.2	Heat shock protein Hsp-12.2	protein_coding		2.1634	3.70137	0.000214437	0.0120261
WBGene00010781	187307		K11H3.4		protein_coding	GO:0035091 (phosphatidylinositol binding); GO:0005769 (early endosome)	-2.82144	-3.70069	0.000215013	0.0120292
WBGene00017471	180709		F14H12.3		protein_coding		2.30702	3.69976	0.000215804	0.0120443
WBGene00019113	179277		F59E11.7		protein_coding	GO:0016020 (membrane); GO:0016021 (integral component of membrane)	2.23421	3.69638	0.000218699	0.0121644
WBGene00017968	174191		skpo-3	ShK domain and PerOxidase domain containing protein	protein_coding	GO:0020037 (heme binding); GO:0098869 (cellular oxidant detoxification); GO:0004601 (peroxidase activity); GO:0006979 (response to oxidative stress); GO:0055114 (oxidation-reduction process)	2.11895	3.69602	0.000219008	0.0121644
WBGene00007340	174741		C05D12.2		protein_coding		2.14441	3.69444	0.000220373	0.0122109
WBGene00017613	179090		F20A1.1		protein_coding		2.08609	3.69098	0.000223389	0.0123484
WBGene00001500	179138		ftn-1	Ferritin	protein_coding	GO:0005737 (cytoplasm); GO:0046872 (metal ion binding); GO:0016491 (oxidoreductase activity); GO:0005515 (protein binding); GO:0008198 (ferrous iron binding); GO:0004322 (ferroxidase activity); GO:0042802 (identical protein binding); GO:0008199 (ferric iron binding); GO:0006826 (iron ion transport); GO:0006879 (cellular iron ion homeostasis); GO:0006880 (intracellular sequestering of iron ion)	-2.48149	-3.68959	0.000224619	0.0123867
WBGene00001460	178498		flp-17	FMRF-Like Peptide	protein_coding	GO:0005576 (extracellular region); GO:0007218 (neuropeptide signaling pathway); GO:0043005 (neuron projection); GO:0043025 (neuronal cell body); GO:1901045 (negative regulation of oviposition)	2.0716	3.68506	0.000228646	0.0125788
WBGene00009173	185001		prom-1	PRogression Of Meiosis	protein_coding		-2.3856	-3.6814	0.00023196	0.0127308
WBGene00009086	181542		F23D12.2		protein_coding		-3.78347	-3.67607	0.000236852	0.0129146
WBGene00004225	171609		ptr-11	PaTched Related family	protein_coding	GO:0016020 (membrane); GO:0016021 (integral component of membrane); GO:0005886 (plasma membrane); GO:0030659 (cytoplasmic vesicle membrane); GO:0006897 (endocytosis); GO:0018996 (molting cycle, collagen and cuticulin-based cuticle); GO:0045138 (nematode male tail tip morphogenesis)	2.05175	3.67593	0.000236985	0.0129146
WBGene00013853	259343		ZC116.1		protein_coding		1.98637	3.67606	0.000236859	0.0129146
WBGene00019682	176136		K12H4.7	Putative serine protease K12H4.7	protein_coding	GO:0016787 (hydrolase activity); GO:0006508 (proteolysis); GO:0008233 (peptidase activity); GO:0008236 (serine-type peptidase activity); GO:0008239 (dipeptidyl-peptidase activity); GO:0005575 (cellular_component); GO:0045087 (innate immune response)	-2.26113	-3.67151	0.000241121	0.013109
WBGene00003405	179488	4361	mre-11	Double-strand break repair protein mre-11	protein_coding	GO:0030870 (Mre11 complex); GO:0006302 (double-strand break repair); GO:0004519 (endonuclease activity); GO:0008408 (3'-5' exonuclease activity); GO:0016787 (hydrolase activity); GO:0030145 (manganese ion binding); GO:0005634 (nucleus)	-2.14322	-3.67079	0.000241799	0.0131098
WBGene00020589	178879		T19H12.3		protein_coding		2.18243	3.6703	0.000242269	0.0131098
WBGene00021395	176833		pnc-1	Pyrazinamidase and NiCotinamidase	protein_coding	GO:0008936 (nicotinamidase activity); GO:0006769 (nicotinamide metabolic process); GO:0005615 (extracellular space); GO:0005634 (nucleus); GO:0005737 (cytoplasm)	2.02539	3.66907	0.000243432	0.0131419
WBGene00001446	181221		flp-3	FMRFamide-like neuropeptides 3 SPLGTMRF-amide TPLGTMRF-amide SAEPFGTMRF-amide NPENDTPFGTMRF-amide ASEDALFGTMRF-amide EAEEPLGTMRF-amide SADDSAPFGTMRF-amide NPLGTMRF-amide	protein_coding	GO:0007218 (neuropeptide signaling pathway)	2.28212	3.66642	0.000245968	0.0132217
WBGene00011708	177700		T11B7.5		protein_coding		2.36398	3.66633	0.000246055	0.0132217
WBGene00013647	190888		Y105C5B.5		protein_coding		1.9421	3.66524	0.000247104	0.0132473
WBGene00019361	186951		clik-3	CaLponIn-liKe proteins	protein_coding		2.12241	3.66015	0.000252066	0.013482
WBGene00020192	171962		T03F1.11		protein_coding	GO:0005509 (calcium ion binding)	2.05067	3.65881	0.000253386	0.0135213
WBGene00008061	172786		C41G7.3		protein_coding	GO:0003723 (RNA binding); GO:0005737 (cytoplasm); GO:0003676 (nucleic acid binding); GO:0010629 (negative regulation of gene expression); GO:0043066 (negative regulation of apoptotic process); GO:0048471 (perinuclear region of cytoplasm); GO:0060968 (regulation of gene silencing)	-2.37308	-3.65363	0.000258557	0.0137105
WBGene00009300	185175		F31F6.1		protein_coding		-4.76239	-3.65357	0.00025862	0.0137105
WBGene00019204	179271	2678	H14N18.4		protein_coding	GO:0016020 (membrane); GO:0016021 (integral component of membrane); GO:0005886 (plasma membrane); GO:0006412 (translation); GO:0006751 (glutathione catabolic process); GO:0006508 (proteolysis); GO:0000048 (peptidyltransferase activity); GO:0036374 (glutathione hydrolase activity)	1.99047	3.65348	0.000258711	0.0137105
WBGene00007071	179447		AC3.5	Aminopeptidase-like protein AC3.5	protein_coding	GO:0016020 (membrane); GO:0016021 (integral component of membrane); GO:0005737 (cytoplasm); GO:0008270 (zinc ion binding); GO:0006508 (proteolysis); GO:0008237 (metallopeptidase activity); GO:0042277 (peptide binding); GO:0043171 (peptide catabolic process); GO:0070006 (metalloaminopeptidase activity); GO:0004177 (aminopeptidase activity)	2.25387	3.64763	0.000264672	0.0139943
WBGene00044554	3896827		F41E6.15		protein_coding		2.24492	3.6409	0.000271684	0.0143322
WBGene00021532	175866		Y42G9A.2		protein_coding		2.40385	3.63752	0.000275273	0.0144885
WBGene00010281	179856		F58G11.3		protein_coding		-2.14773	-3.63347	0.000279638	0.0146848
WBGene00000273	176637		brp-1	Bypass of Response to Pheromone in yeast	protein_coding	GO:0016020 (membrane); GO:0016021 (integral component of membrane); GO:0005515 (protein binding)	1.90483	3.62624	0.000287576	0.0150674
WBGene00007324	259334		C05B5.8		protein_coding	GO:0016020 (membrane); GO:0016021 (integral component of membrane)	2.36936	3.62412	0.000289945	0.0151572
WBGene00015766	178953		C14C11.2		protein_coding		-2.77826	-3.61998	0.000294631	0.0153658
WBGene00007395	259679		dcar-1	DihydroCaffeic Acid Receptor; L-3,4-dihydroxyphenylalanine receptor	protein_coding	GO:0016020 (membrane); GO:0016021 (integral component of membrane); GO:0005887 (integral component of plasma membrane); GO:0007186 (G protein-coupled receptor signaling pathway); GO:0004930 (G protein-coupled receptor activity); GO:0097730 (non-motile cilium); GO:0050832 (defense response to fungus); GO:0016324 (apical plasma membrane); GO:0009611 (response to wounding)	2.02875	3.61942	0.000295266	0.0153658
WBGene00010049	174773		F54D5.3		protein_coding		-1.97265	-3.61858	0.000296219	0.0153808
WBGene00008294	183773		clec-11	C-type LECtin	protein_coding	GO:0030246 (carbohydrate binding)	-3.40915	-3.61495	0.000300404	0.0155631
WBGene00009813	181279	3034	haly-1	Histidine ammonia-lyase	protein_coding	GO:0016841 (ammonia-lyase activity); GO:0006548 (histidine catabolic process); GO:0004397 (histidine ammonia-lyase activity); GO:0005737 (cytoplasm); GO:0003824 (catalytic activity)	1.92893	3.61162	0.000304288	0.0157291
WBGene00016101	182896		C25E10.12	UPF0046 protein C25E10.12	protein_coding	GO:0016787 (hydrolase activity)	1.96616	3.60609	0.000310847	0.0160322
WBGene00020242	178811		phat-5	PHAryngeal gland Toxin-related	protein_coding	GO:1905905 (pharyngeal gland morphogenesis)	-14.7067	-3.59458	0.000324915	0.0167205
WBGene00018819	186242		rog-1	Ras activating factor in development Of Germline	protein_coding	GO:0016020 (membrane)	-2.08875	-3.59009	0.00033056	0.0169732
WBGene00000107	175691	217	alh-1	ALdehyde deHydrogenase	protein_coding	GO:0016491 (oxidoreductase activity); GO:0016620 (oxidoreductase activity, acting on the aldehyde or oxo group of donors, NAD or NADP as acceptor); GO:0004029 (aldehyde dehydrogenase (NAD+) activity); GO:0055114 (oxidation-reduction process)	-1.92262	-3.5888	0.000332209	0.01702
WBGene00270318	29991189		F26G1.15		protein_coding		-2.7148	-3.58084	0.000342486	0.0174699
WBGene00013540	176642		Y75B8A.3		protein_coding	GO:0005615 (extracellular space)	2.1021	3.58083	0.000342503	0.0174699
WBGene00008803	174345		lips-10	LIPaSe related	protein_coding	GO:0016787 (hydrolase activity); GO:0016298 (lipase activity); GO:0016042 (lipid catabolic process)	2.08325	3.57893	0.000345005	0.0175202
WBGene00011886	188686		T21B10.4		protein_coding	GO:0016020 (membrane); GO:0016021 (integral component of membrane)	-2.18933	-3.57927	0.00034455	0.0175202
WBGene00004173	180328		pqn-94	Prion-like-(Q/N-rich)-domain-bearing protein	protein_coding		1.9641	3.57668	0.00034798	0.0176325
WBGene00009340	179471		best-14	Bestrophin homolog 14	protein_coding		2.01986	3.56902	0.00035832	0.0180292
WBGene00018902	259576		F55G1.6		protein_coding	GO:0016020 (membrane); GO:0016021 (integral component of membrane)	-2.6124	-3.57025	0.000356644	0.0180292
WBGene00003523	182259		nas-4	Zinc metalloproteinase nas-4	protein_coding	GO:0004222 (metalloendopeptidase activity); GO:0008237 (metallopeptidase activity); GO:0006508 (proteolysis); GO:0008270 (zinc ion binding); GO:0016787 (hydrolase activity); GO:0046872 (metal ion binding); GO:0008233 (peptidase activity)	4.39475	3.56857	0.000358929	0.0180292
WBGene00014163	191471		rnh-1.2	RNase H	protein_coding	GO:0003676 (nucleic acid binding); GO:0004523 (RNA-DNA hybrid ribonuclease activity); GO:0043137 (DNA replication, removal of RNA primer); GO:0090502 (RNA phosphodiester bond hydrolysis, endonucleolytic)	-2.55439	-3.56869	0.000358766	0.0180292
WBGene00015709	179148	1573	cyp-33A1	CYtochrome P450 family	protein_coding	GO:0005737 (cytoplasm); GO:0046872 (metal ion binding); GO:0043231 (intracellular membrane-bounded organelle); GO:0016491 (oxidoreductase activity); GO:0004497 (monooxygenase activity); GO:0020037 (heme binding); GO:0005506 (iron ion binding); GO:0016705 (oxidoreductase activity, acting on paired donors, with incorporation or reduction of molecular oxygen); GO:0006082 (organic acid metabolic proc…	-1.96038	-3.5665	0.000361781	0.018133
WBGene00017600	184686		ttr-10	TransThyretin-Related family domain	protein_coding	GO:0005576 (extracellular region); GO:0009986 (cell surface)	1.91882	3.56581	0.000362737	0.0181415
WBGene00022292	180499		Y75D11A.3		protein_coding		-3.34993	-3.56496	0.00036391	0.0181609
WBGene00000176	180744		aqp-8	AQuaPorin or aquaglyceroporin related	protein_coding	GO:0016020 (membrane); GO:0016021 (integral component of membrane); GO:0055085 (transmembrane transport); GO:0015267 (channel activity); GO:0009986 (cell surface)	2.23653	3.5642	0.000364969	0.0181745
WBGene00012664	180264		Y39B6A.1		protein_coding	GO:0005730 (nucleolus); GO:0005654 (nucleoplasm)	2.22953	3.5634	0.000366082	0.0181908
WBGene00022245	177407		acp-6	ACid Phosphatase family	protein_coding	GO:0016311 (dephosphorylation); GO:0016791 (phosphatase activity)	1.99465	3.55485	0.000378199	0.0187525
WBGene00007978	172685		C36B1.11		protein_coding	GO:0005515 (protein binding)	-2.01364	-3.5537	0.000379851	0.0187941
WBGene00003071	172520	4036	lrp-1	Low-density lipoprotein receptor-related protein	protein_coding	GO:0005509 (calcium ion binding); GO:0005515 (protein binding)	1.98975	3.55106	0.000383686	0.0189069
WBGene00012795	177995		Y43E12A.3		protein_coding	GO:0005515 (protein binding)	-3.24729	-3.551	0.000383769	0.0189069
WBGene00006940	174531		wee-1.3	Membrane-associated tyrosine- and threonine-specific cdc2-inhibitory kinase wee-1.3	protein_coding	GO:0004672 (protein kinase activity); GO:0006468 (protein phosphorylation); GO:0005524 (ATP binding)	-2.02121	-3.54987	0.000385422	0.018948
WBGene00002827	178120		let-653		protein_coding		2.19696	3.54495	0.000392692	0.0192644
WBGene00011945	172861		alg-5		protein_coding	GO:0003676 (nucleic acid binding); GO:0005515 (protein binding)	-2.10165	-3.5438	0.000394402	0.0193073
WBGene00016362	183176		C33G8.4		protein_coding		2.05949	3.53998	0.000400157	0.0195064
WBGene00001772	185407	27306	gst-24	Glutathione S-Transferase	protein_coding	GO:0016740 (transferase activity); GO:0006749 (glutathione metabolic process); GO:0004364 (glutathione transferase activity); GO:0045087 (innate immune response); GO:0005515 (protein binding)	2.67366	3.5402	0.00039983	0.0195064
WBGene00022623	179065		ZC487.1		protein_coding	GO:0005524 (ATP binding); GO:0000166 (nucleotide binding); GO:0046872 (metal ion binding)	2.20974	3.53885	0.000401877	0.019549
WBGene00020136	187929		nlp-45	Neuropeptide-Like Protein	protein_coding	GO:0007218 (neuropeptide signaling pathway)	4.57624	3.53541	0.000407151	0.0197639
WBGene00012276	179734		his-74	Histone H3.3-like type 2	protein_coding	GO:0046982 (protein heterodimerization activity); GO:0000786 (nucleosome); GO:0003677 (DNA binding)	-2.04843	-3.5291	0.000416974	0.0201983
WBGene00009475	172722	137735	F36F2.1		protein_coding	GO:0003779 (actin binding); GO:0045944 (positive regulation of transcription by RNA polymerase II); GO:0030017 (sarcomere); GO:0035025 (positive regulation of Rho protein signal transduction); GO:0051091 (positive regulation of DNA-binding transcription factor activity); GO:0005783 (endoplasmic reticulum)	2.10068	3.5278	0.000419021	0.0201984
WBGene00001395	177820	9415	fat-3	Delta(6)-fatty-acid desaturase fat-3	protein_coding	GO:0006629 (lipid metabolic process); GO:0016491 (oxidoreductase activity); GO:0016021 (integral component of membrane); GO:0016020 (membrane)	-1.94479	-3.52744	0.000419598	0.0201984
WBGene00018725	186143		kreg-1		protein_coding	GO:0097501 (stress response to metal ion)	-2.93268	-3.52848	0.000417954	0.0201984
WBGene00009877	177751		F49C12.7		protein_coding		-2.03483	-3.52548	0.000422708	0.0202637
WBGene00002214	178007		klc-1	Kinesin Light Chain	protein_coding	GO:0005737 (cytoplasm); GO:0005856 (cytoskeleton); GO:0005874 (microtubule); GO:0005515 (protein binding); GO:0005871 (kinesin complex); GO:0040038 (polar body extrusion after meiotic divisions); GO:0051295 (establishment of meiotic spindle localization)	-2.00708	-3.52596	0.000421944	0.0202637
WBGene00000770	176310		cpb-1	Cytoplasmic polyadenylation element-binding protein 1	protein_coding	GO:0045182 (translation regulator activity); GO:0003730 (mRNA 3'-UTR binding); GO:0006417 (regulation of translation); GO:0003676 (nucleic acid binding)	-2.41405	-3.52148	0.00042915	0.0204349
WBGene00018731	181118		F53A9.8		protein_coding	GO:0050830 (defense response to Gram-positive bacterium)	-2.27127	-3.52107	0.000429817	0.0204349
WBGene00010493	181501		meg-2		protein_coding	GO:0005515 (protein binding); GO:0043186 (P granule); GO:1903864 (P granule disassembly)	-2.34368	-3.52149	0.000429125	0.0204349
WBGene00020245	179151		T05B11.1		protein_coding	GO:0005515 (protein binding)	2.11578	3.52211	0.000428135	0.0204349
WBGene00009090	259352		fipr-3	FIP (Fungus-Induced Protein) Related	protein_coding	GO:0016020 (membrane); GO:0016021 (integral component of membrane)	2.68908	3.51797	0.000434854	0.0206319
WBGene00003783	191735		nos-1	NanOS related	protein_coding	GO:0003723 (RNA binding); GO:0046872 (metal ion binding); GO:0005737 (cytoplasm); GO:0008270 (zinc ion binding); GO:0003729 (mRNA binding); GO:0017148 (negative regulation of translation); GO:0006417 (regulation of translation); GO:0048471 (perinuclear region of cytoplasm); GO:0007614 (short-term memory); GO:0072375 (medium-term memory); GO:0048477 (oogenesis)	-2.67693	-3.51682	0.000436755	0.0206796
WBGene00013214	175083	55510	Y54G11A.3		protein_coding	GO:0005524 (ATP binding); GO:0016787 (hydrolase activity); GO:0004386 (helicase activity); GO:0000166 (nucleotide binding); GO:0003723 (RNA binding); GO:0003676 (nucleic acid binding); GO:0003724 (RNA helicase activity)	-2.12692	-3.51477	0.000440134	0.020797
WBGene00010643	187122		K07G5.4		protein_coding		2.49156	3.51341	0.000442399	0.0208614
WBGene00020393	178665		T10B5.7		protein_coding	GO:0006629 (lipid metabolic process)	-2.36144	-3.51256	0.00044382	0.0208857
WBGene00008244	260084		fipr-11	FIP (Fungus-Induced Protein) Related	protein_coding		2.38879	3.51017	0.000447821	0.0210019
WBGene00001633	176595		gly-8	Probable N-acetylgalactosaminyltransferase 8	protein_coding		2.12203	3.51	0.000448107	0.0210019
WBGene00000665	176117		col-90	Putative cuticle collagen 90	protein_coding	GO:0042302 (structural constituent of cuticle)	27.2029	3.50881	0.000450124	0.0210337
WBGene00011586	259401		flp-33	FMRF-Like Peptide	protein_coding		2.32122	3.50837	0.000450858	0.0210337
WBGene00011066	172470		ztf-15	Zinc finger putative Transcription Factor family	protein_coding	GO:0005634 (nucleus); GO:0000977 (RNA polymerase II transcription regulatory region sequence-specific DNA binding); GO:0000981 (DNA-binding transcription factor activity, RNA polymerase II-specific); GO:0006357 (regulation of transcription by RNA polymerase II)	-2.26431	-3.50799	0.000451514	0.0210337
WBGene00015505	172276		C06A5.8		protein_coding	GO:0046872 (metal ion binding); GO:0005515 (protein binding)	-2.62502	-3.50728	0.000452715	0.0210471
WBGene00001451	181583		flp-8	FMRF-Like Peptide	protein_coding	GO:0005576 (extracellular region); GO:0007218 (neuropeptide signaling pathway); GO:0061096 (negative regulation of turning behavior involved in mating)	2.17335	3.50526	0.00045616	0.0211647
WBGene00002113	173267		ins-30	INSulin related	protein_coding	GO:0005576 (extracellular region); GO:0005179 (hormone activity); GO:0007165 (signal transduction)	3.40574	3.50008	0.000465114	0.0215369
WBGene00008417	172516		D2030.7		protein_coding		-2.20325	-3.49579	0.00047266	0.0218426
WBGene00013349	190395		Y59A8B.12		protein_coding		-2.27496	-3.49051	0.000482099	0.0222343
WBGene00018470	185796		F45E4.5		protein_coding	GO:0050829 (defense response to Gram-negative bacterium)	2.11321	3.48684	0.000488768	0.022497
WBGene00015504	172273		C06A5.6		protein_coding	GO:0005737 (cytoplasm); GO:0031047 (gene silencing by RNA); GO:0007283 (spermatogenesis); GO:0090727 (positive regulation of brood size); GO:0048471 (perinuclear region of cytoplasm); GO:0030422 (production of siRNA involved in RNA interference); GO:1905881 (positive regulation of oogenesis)	-2.26347	-3.48457	0.00049292	0.0226429
WBGene00013048	190106		Y50E8A.5		protein_coding		2.17256	3.48092	0.000499694	0.0229086
WBGene00009434	179868		F35E12.10		protein_coding	GO:0045087 (innate immune response); GO:0045121 (membrane raft)	-2.02146	-3.47851	0.000504212	0.0230243
WBGene00011560	176451		T07C4.3		protein_coding	GO:0005515 (protein binding)	-1.96286	-3.47875	0.000503766	0.0230243
WBGene00016625	174123		aff-1	Cell fusion protein aff-1	protein_coding		3.16823	3.47555	0.000509799	0.0232144
WBGene00018343	175875		F42A10.7		protein_coding		2.0912	3.47525	0.000510383	0.0232144
WBGene00011324	180001		hrde-2		protein_coding		-2.11859	-3.47213	0.000516348	0.0234396
WBGene00013352	190397		lon-8		protein_coding		2.72176	3.4666	0.000527091	0.0238803
WBGene00012879	178336		fbxa-215	F-box A protein	protein_coding	GO:0005515 (protein binding)	-1.96539	-3.46423	0.000531749	0.0240442
WBGene00018195	173674		btb-16	BTB (Broad/complex/Tramtrack/Bric a brac) domain protein	protein_coding	GO:0005515 (protein binding)	-2.33692	-3.46288	0.000534436	0.0241185
WBGene00002225	172213		klp-15	Kinesin-like protein	protein_coding	GO:0005634 (nucleus); GO:0005524 (ATP binding); GO:0000166 (nucleotide binding); GO:0003774 (motor activity); GO:0007018 (microtubule-based movement); GO:0008017 (microtubule binding); GO:0003777 (microtubule motor activity); GO:0005871 (kinesin complex); GO:0005874 (microtubule); GO:0005815 (microtubule organizing center); GO:0007059 (chromosome segregation); GO:0090307 (mitotic spindle assembly…	-2.01158	-3.45924	0.000541694	0.024351
WBGene00044433	3565719		W10C8.6		protein_coding	GO:0016020 (membrane); GO:0016021 (integral component of membrane)	2.16297	3.45929	0.000541608	0.024351
WBGene00003418	171938		msh-2	MSH (MutS Homolog) family	protein_coding	GO:0005524 (ATP binding); GO:0003677 (DNA binding); GO:0005634 (nucleus); GO:0000166 (nucleotide binding); GO:0006298 (mismatch repair); GO:0030983 (mismatched DNA binding); GO:0006974 (cellular response to DNA damage stimulus); GO:0032300 (mismatch repair complex); GO:0008094 (DNA-dependent ATPase activity); GO:0045910 (negative regulation of DNA recombination); GO:0000400 (four-way junction DNA…	-2.04107	-3.45642	0.000547396	0.0245595
WBGene00045331	6418724		F14D7.12		protein_coding		6.80311	3.45376	0.000552824	0.0247549
WBGene00002032	259571		htp-1	Him-Three Paralog	protein_coding	GO:0030997 (regulation of centriole-centriole cohesion); GO:0000800 (lateral element)	-2.20496	-3.45183	0.000556794	0.0248845
WBGene00009192	185021		asah-2	Probable acid ceramidase	protein_coding	GO:0017064 (fatty acid amide hydrolase activity); GO:0005764 (lysosome); GO:0006631 (fatty acid metabolic process)	-2.44191	-3.45052	0.000559501	0.0249572
WBGene00004122	173800		pqn-35	Prion-like-(Q/N-rich)-domain-bearing protein	protein_coding	GO:0016020 (membrane); GO:0016021 (integral component of membrane)	1.98599	3.44774	0.000565295	0.0251187
WBGene00021555	178819	7511	Y45G5AM.2		protein_coding	GO:0016787 (hydrolase activity); GO:0006508 (proteolysis); GO:0070006 (metalloaminopeptidase activity)	-2.46389	-3.44805	0.000564641	0.0251187
WBGene00020858	188992		mop-25.3	MO25-like protein 3	protein_coding		-2.61324	-3.44426	0.00057263	0.0253958
WBGene00008789	179929		F14D7.2		protein_coding		-2.183	-3.44254	0.000576275	0.0254597
WBGene00018803	173727		fbxa-24	F-box A protein	protein_coding		1.9632	3.44305	0.0005752	0.0254597
WBGene00009801	181196	8398	ipla-2	Intracelllar PhosphoLipase A family	protein_coding	GO:0005737 (cytoplasm); GO:0006629 (lipid metabolic process); GO:0051015 (actin filament binding); GO:0051017 (actin filament bundle assembly); GO:0042594 (response to starvation); GO:0044258 (intestinal lipid catabolic process); GO:0005515 (protein binding)	-1.87098	-3.44023	0.000581223	0.0256221
WBGene00004043	171838	5347	plk-2	Serine/threonine-protein kinase plk-2	protein_coding	GO:0004672 (protein kinase activity); GO:0006468 (protein phosphorylation); GO:0005515 (protein binding); GO:0005524 (ATP binding)	-2.05567	-3.43979	0.000582169	0.0256221
WBGene00009203	185047		aptf-3	AP-2 Transcription Factor family	protein_coding	GO:0005634 (nucleus); GO:0003700 (DNA-binding transcription factor activity); GO:0006355 (regulation of transcription, DNA-templated); GO:0042127 (regulation of cell population proliferation); GO:0000977 (RNA polymerase II transcription regulatory region sequence-specific DNA binding); GO:0000981 (DNA-binding transcription factor activity, RNA polymerase II-specific); GO:0006357 (regulation of tr…	-2.53442	-3.43818	0.000585648	0.0257262
WBGene00006650			tts-1		ncRNA		-2.17265	-3.43733	0.000587477	0.0257576
WBGene00023432	259624		K12B6.9		protein_coding		-2.55262	-3.42951	0.000604673	0.0264613
WBGene00013633	190873		Y105C5A.8		protein_coding		1.91027	3.42839	0.000607173	0.0265205
WBGene00000751	181307		col-178	COLlagen	protein_coding	GO:0016020 (membrane); GO:0016021 (integral component of membrane); GO:0005615 (extracellular space); GO:0030198 (extracellular matrix organization); GO:0042302 (structural constituent of cuticle); GO:0005201 (extracellular matrix structural constituent); GO:0031012 (extracellular matrix)	1.94461	3.42678	0.00061078	0.0266277
WBGene00017322	176167		clec-160	C-type lectin domain-containing protein 160	protein_coding		2.08898	3.42231	0.000620919	0.0270187
WBGene00019960	180756		ztf-16	Zinc finger putative Transcription Factor family	protein_coding	GO:0005634 (nucleus); GO:0046872 (metal ion binding); GO:0010628 (positive regulation of gene expression); GO:0008406 (gonad development)	2.15673	3.42074	0.000624514	0.0271241
WBGene00008861	184530		F15D4.4		protein_coding	GO:0005764 (lysosome); GO:0006508 (proteolysis); GO:0004197 (cysteine-type endopeptidase activity); GO:0005615 (extracellular space); GO:0008234 (cysteine-type peptidase activity); GO:0051603 (proteolysis involved in cellular protein catabolic process)	3.09047	3.42008	0.000626025	0.0271387
WBGene00009937	172844		lsl-1	LSY-2-Like	protein_coding	GO:0000978 (RNA polymerase II cis-regulatory region sequence-specific DNA binding); GO:0003700 (DNA-binding transcription factor activity); GO:0006357 (regulation of transcription by RNA polymerase II)	-2.22623	-3.419	0.000628523	0.027196
WBGene00018806	173724		F54D10.5		protein_coding		-2.35735	-3.41614	0.000635167	0.0274321
WBGene00001973	172250	6749	hmg-3	FACT complex subunit ssrp1-B	protein_coding	GO:0003677 (DNA binding); GO:0005634 (nucleus); GO:0042393 (histone binding); GO:0031491 (nucleosome binding); GO:0006260 (DNA replication); GO:0006281 (DNA repair); GO:0006974 (cellular response to DNA damage stimulus); GO:0005694 (chromosome); GO:0060465 (pharynx development); GO:0045995 (regulation of embryonic development); GO:0035101 (FACT complex); GO:1902275 (regulation of chromatin organi…	-1.95471	-3.41448	0.000639041	0.0275479
WBGene00000993	181761	25979	dhs-30	DeHydrogenases, Short chain	protein_coding	GO:0016491 (oxidoreductase activity); GO:0055114 (oxidation-reduction process)	-1.8568	-3.41298	0.000642577	0.0276488
WBGene00010183	3565474		fipr-13	FIP (Fungus-Induced Protein) Related	protein_coding		1.88652	3.4056	0.000660185	0.0282677
WBGene00019341	173604		K02F6.7		protein_coding		-2.33602	-3.40564	0.000660089	0.0282677
WBGene00021994	177296		Y59E9AL.4		protein_coding	GO:0016020 (membrane); GO:0016021 (integral component of membrane); GO:0022857 (transmembrane transporter activity); GO:0055085 (transmembrane transport)	2.85947	3.40542	0.000660632	0.0282677
WBGene00018036	185268		F35C8.5	Cholesterol 25-hydroxylase-like protein	protein_coding	GO:0016020 (membrane); GO:0016021 (integral component of membrane); GO:0046872 (metal ion binding); GO:0016491 (oxidoreductase activity); GO:0005789 (endoplasmic reticulum membrane); GO:0006629 (lipid metabolic process); GO:0005506 (iron ion binding); GO:0000254 (C-4 methylsterol oxidase activity); GO:0008610 (lipid biosynthetic process); GO:0016126 (sterol biosynthetic process); GO:0008202 (ster…	-2.19478	-3.40414	0.000663732	0.0283479
WBGene00017068	172380		D2092.8		protein_coding		5.04321	3.40353	0.000665203	0.0283583
WBGene00016436	177172		C35B1.7		protein_coding		2.55626	3.40145	0.000670296	0.0285228
WBGene00011817	188562		T16H12.9		protein_coding		2.65729	3.40075	0.000672003	0.0285428
WBGene00255714	25502967		B0511.19		protein_coding	GO:0016020 (membrane); GO:0016021 (integral component of membrane)	-2.31976	-3.38974	0.000699584	0.0296598
WBGene00017506	178648		F16B4.4		protein_coding		2.08599	3.38716	0.000706198	0.0298514
WBGene00001615	174258	2898	glr-4	GLutamate Receptor family (AMPA)	protein_coding	GO:0016020 (membrane); GO:0016021 (integral component of membrane); GO:0038023 (signaling receptor activity); GO:0005886 (plasma membrane); GO:0006811 (ion transport); GO:0034220 (ion transmembrane transport); GO:0008066 (glutamate receptor activity); GO:0030054 (cell junction); GO:0045202 (synapse); GO:0045211 (postsynaptic membrane); GO:0060078 (regulation of postsynaptic membrane potential); G…	2.30678	3.38682	0.000707086	0.0298514
WBGene00022830	172040	55133	ZK973.1		protein_coding	GO:0003676 (nucleic acid binding); GO:0003729 (mRNA binding); GO:0006139 (nucleobase-containing compound metabolic process); GO:0003735 (structural constituent of ribosome); GO:0006412 (translation)	-1.93878	-3.38647	0.000707979	0.0298514
WBGene00021011	189167		W03G1.5		protein_coding		2.21161	3.38479	0.00071234	0.0299805
WBGene00004178	172515	9271	prg-1	Piwi-like protein	protein_coding	GO:0003676 (nucleic acid binding); GO:0000003 (reproduction); GO:0007283 (spermatogenesis); GO:0043186 (P granule); GO:0007276 (gamete generation); GO:0042078 (germ-line stem cell division); GO:0034583 (21U-RNA binding); GO:0034585 (21U-RNA metabolic process); GO:0045840 (positive regulation of mitotic nuclear division); GO:0005515 (protein binding)	-1.92155	-3.38354	0.000715575	0.030062
WBGene00001872	174157	4438	him-14	MutS protein homolog him-14	protein_coding	GO:0006298 (mismatch repair); GO:0030983 (mismatched DNA binding); GO:0005524 (ATP binding)	-2.61156	-3.37995	0.00072498	0.0304018
WBGene00012484	173158		car-1	Cytokinesis, Apoptosis, RNA-associated	protein_coding	GO:0000932 (P-body); GO:0033962 (P-body assembly); GO:0005515 (protein binding); GO:1990124 (messenger ribonucleoprotein complex); GO:0003729 (mRNA binding); GO:0010628 (positive regulation of gene expression); GO:0006397 (mRNA processing); GO:0034063 (stress granule assembly); GO:0005737 (cytoplasm); GO:0005783 (endoplasmic reticulum); GO:0043186 (P granule); GO:1990904 (ribonucleoprotein comple…	-1.8298	-3.3788	0.000728034	0.0304746
WBGene00009270	172548		F30F8.1		protein_coding		-2.09328	-3.37635	0.000734555	0.0306919
WBGene00013208	175016		Y54G9A.5		protein_coding	GO:0016020 (membrane); GO:0016021 (integral component of membrane)	-2.13771	-3.3745	0.000739493	0.0308424
WBGene00010050	174772		F54D5.4		protein_coding	GO:0045087 (innate immune response)	-2.58552	-3.37269	0.000744369	0.0309899
WBGene00006642	192066		tsp-16	TetraSPanin family	protein_coding	GO:0016020 (membrane); GO:0016021 (integral component of membrane)	2.31483	3.37141	0.000747857	0.0310791
WBGene00018696	186114	55	pho-6	Intestinal acid PHOsphatase	protein_coding	GO:0016311 (dephosphorylation); GO:0016791 (phosphatase activity)	2.57099	3.36986	0.000752069	0.031198
WBGene00022203	180384		Y73B3A.1		protein_coding	GO:0005634 (nucleus)	-2.0264	-3.36655	0.000761151	0.0314618
WBGene00018867	172186		zhp-1	Zip (Yeast meiotic zipper) Homologous Protein	protein_coding	GO:0046872 (metal ion binding); GO:0005515 (protein binding); GO:0005694 (chromosome); GO:0006310 (DNA recombination); GO:0000795 (synaptonemal complex); GO:0007129 (homologous chromosome pairing at meiosis); GO:0016925 (protein sumoylation); GO:0019789 (SUMO transferase activity); GO:0051321 (meiotic cell cycle); GO:0007131 (reciprocal meiotic recombination)	-3.18403	-3.3669	0.000760171	0.0314618
WBGene00005002	171681		spp-17	SaPosin-like Protein family	protein_coding		-2.21492	-3.36593	0.000762871	0.0314766
WBGene00011428	179532		nlp-80	Neuropeptide-Like Protein	protein_coding	GO:0007218 (neuropeptide signaling pathway)	1.9692	3.36415	0.000767795	0.0316233
WBGene00003741	185978		nlp-3	Neuropeptide-Like Protein	protein_coding	GO:0007218 (neuropeptide signaling pathway)	2.24247	3.36285	0.000771413	0.0317158
WBGene00017836	178974		F26F12.5		protein_coding	GO:0050829 (defense response to Gram-negative bacterium)	2.3454	3.35738	0.000786854	0.0322359
WBGene00020855	188979		hpo-36		protein_coding	GO:0016020 (membrane); GO:0016021 (integral component of membrane)	2.47058	3.35778	0.000785698	0.0322359
WBGene00014150	3565097		ZK909.6		protein_coding		2.09065	3.35634	0.0007898	0.0322993
WBGene00013327	178410		Y57G11C.38		protein_coding		2.5239	3.35128	0.000804393	0.0328238
WBGene00014106	191439	27293	ZK856.5		protein_coding	GO:0016787 (hydrolase activity); GO:0005576 (extracellular region); GO:0005615 (extracellular space); GO:0008081 (phosphoric diester hydrolase activity)	-1.98349	-3.35091	0.000805467	0.0328238
WBGene00016425	183220		C34H4.2		protein_coding		2.79373	3.34936	0.000809977	0.0329495
WBGene00008511	177909		F01G10.9		protein_coding		2.87406	3.34801	0.00081393	0.0330521
WBGene00009790	179600		lgc-44	Ligand-Gated ion Channel	protein_coding	GO:0016020 (membrane); GO:0016021 (integral component of membrane); GO:0004888 (transmembrane signaling receptor activity); GO:0005216 (ion channel activity); GO:0005230 (extracellular ligand-gated ion channel activity); GO:0005886 (plasma membrane); GO:0006811 (ion transport); GO:0034220 (ion transmembrane transport); GO:0042391 (regulation of membrane potential); GO:0007268 (chemical synaptic t…	2.45737	3.34563	0.00082097	0.0332795
WBGene00022254	177402		nlp-71	Neuropeptide-Like Protein	protein_coding	GO:0007218 (neuropeptide signaling pathway)	2.37177	3.34032	0.000836805	0.033862
WBGene00015095	172169		B0261.7		protein_coding	GO:0005515 (protein binding)	-1.95893	-3.33829	0.000842952	0.0340511
WBGene00003485	181698	84823	mua-6	Intermediate filament protein ifa-2	protein_coding		1.99733	3.32954	0.000869905	0.0350786
WBGene00010953	178423		clec-190	C-type LECtin	protein_coding	GO:0030246 (carbohydrate binding)	1.88811	3.32828	0.000873825	0.0351753
WBGene00010514	186896		K02E11.5		protein_coding		2.23485	3.32728	0.000876992	0.0352413
WBGene00016824	179145		C50E3.13		protein_coding		-2.36718	-3.32559	0.000882323	0.0353327
WBGene00010062	179771	3988	lipl-1	Lipase	protein_coding	GO:0016787 (hydrolase activity); GO:0005576 (extracellular region); GO:0006629 (lipid metabolic process); GO:0016042 (lipid catabolic process); GO:0016788 (hydrolase activity, acting on ester bonds); GO:0005764 (lysosome); GO:0043202 (lysosomal lumen)	-2.95913	-3.32602	0.000880959	0.0353327
WBGene00017331	184292		ugt-40	UDP-GlucuronosylTransferase	protein_coding	GO:0016020 (membrane); GO:0016021 (integral component of membrane); GO:0016740 (transferase activity); GO:0043231 (intracellular membrane-bounded organelle); GO:0015020 (glucuronosyltransferase activity); GO:0016757 (transferase activity, transferring glycosyl groups); GO:0008194 (UDP-glycosyltransferase activity)	6.43734	3.31796	0.000906786	0.0362495
WBGene00022680	177219		ZK180.6		protein_coding		3.73899	3.31433	0.000918639	0.0366599
WBGene00008968	184716		elli-1	EnLarged germLIne granules	protein_coding	GO:0005737 (cytoplasm); GO:0009792 (embryo development ending in birth or egg hatching); GO:1903863 (P granule assembly); GO:0003674 (molecular_function)	-2.0388	-3.31182	0.000926899	0.0369257
WBGene00019109	186621	115817	F59E11.2		protein_coding	GO:0016491 (oxidoreductase activity); GO:0055114 (oxidation-reduction process)	2.66778	3.31131	0.000928613	0.0369303
WBGene00015044	181851		cyp-34A9	CYtochrome P450 family	protein_coding	GO:0005737 (cytoplasm); GO:0046872 (metal ion binding); GO:0043231 (intracellular membrane-bounded organelle); GO:0016491 (oxidoreductase activity); GO:0004497 (monooxygenase activity); GO:0020037 (heme binding); GO:0005506 (iron ion binding); GO:0016705 (oxidoreductase activity, acting on paired donors, with incorporation or reduction of molecular oxygen); GO:0006082 (organic acid metabolic proc…	-2.78142	-3.31042	0.000931555	0.0369837
WBGene00001571	174328		gei-14	GEX Interacting protein	protein_coding		-2.0694	-3.30946	0.000934761	0.0370473
WBGene00001413	177734		fem-3	Sex-determination protein fem-3	protein_coding	GO:0005515 (protein binding); GO:0042006 (masculinization of hermaphroditic germ-line); GO:0030238 (male sex determination)	-2.10285	-3.30891	0.00093661	0.0370571
WBGene00008170	176350		C48B4.7		protein_coding		-2.56568	-3.30382	0.000953783	0.0376272
WBGene00001985	172017		hop-1	Presenilin hop-1	protein_coding	GO:0016485 (protein processing); GO:0004190 (aspartic-type endopeptidase activity); GO:0016021 (integral component of membrane)	-2.38973	-3.30319	0.000955906	0.0376272
WBGene00018992			trpl-1		pseudogene		2.36616	3.30337	0.000955297	0.0376272
WBGene00000138	173146		amx-2	AMine oXidase family	protein_coding	GO:0003682 (chromatin binding); GO:0045944 (positive regulation of transcription by RNA polymerase II); GO:0016491 (oxidoreductase activity); GO:0008134 (transcription factor binding); GO:0000122 (negative regulation of transcription by RNA polymerase II); GO:0050660 (flavin adenine dinucleotide binding); GO:0034648 (histone demethylase activity (H3-dimethyl-K4 specific)); GO:0034720 (histone H3-…	1.94085	3.30096	0.00096355	0.0377993
WBGene00010064	186253		F54F7.2		protein_coding		-2.30474	-3.3011	0.000963078	0.0377993
WBGene00003031	179782		lin-46	LIN-46	protein_coding	GO:0005737 (cytoplasm); GO:0046872 (metal ion binding); GO:0016740 (transferase activity); GO:0005524 (ATP binding); GO:0005829 (cytosol); GO:0045211 (postsynaptic membrane); GO:0030425 (dendrite); GO:0098970 (postsynaptic neurotransmitter receptor diffusion trapping); GO:0006777 (Mo-molybdopterin cofactor biosynthetic process); GO:0007529 (establishment of synaptic specificity at neuromuscular j…	2.2924	3.29988	0.000967274	0.0378811
WBGene00019156	186690		H04M03.12		protein_coding	GO:0016020 (membrane); GO:0016021 (integral component of membrane)	2.22968	3.29862	0.00097163	0.0379231
WBGene00022586	172336		ZC308.4		protein_coding		-1.98943	-3.29896	0.00097045	0.0379231
WBGene00007818	3565278		C30F2.4		protein_coding		4.74886	3.2821	0.00103036	0.0400127
WBGene00016417	173892		C34F11.8		protein_coding		2.226	3.28242	0.0010292	0.0400127
WBGene00000713	178971		col-140	COLlagen	protein_coding	GO:0042302 (structural constituent of cuticle)	1.88935	3.28256	0.00102871	0.0400127
WBGene00003549	186493		nas-31	Zinc metalloproteinase nas-31	protein_coding	GO:0018996 (molting cycle, collagen and cuticulin-based cuticle); GO:0004222 (metalloendopeptidase activity); GO:0008237 (metallopeptidase activity); GO:0006508 (proteolysis); GO:0008270 (zinc ion binding)	2.77278	3.27895	0.00104194	0.0403945
WBGene00018334	185653	1573	cyp-33E2	CYtochrome P450 family	protein_coding	GO:0005737 (cytoplasm); GO:0046872 (metal ion binding); GO:0043231 (intracellular membrane-bounded organelle); GO:0016491 (oxidoreductase activity); GO:0004497 (monooxygenase activity); GO:0020037 (heme binding); GO:0005506 (iron ion binding); GO:0016705 (oxidoreductase activity, acting on paired donors, with incorporation or reduction of molecular oxygen); GO:0006082 (organic acid metabolic proc…	2.17796	3.27792	0.00104575	0.0404741
WBGene00007985	172790		swah-1	SoWAH (Drosophila) homolog	protein_coding	GO:0016567 (protein ubiquitination); GO:0045732 (positive regulation of protein catabolic process); GO:0005515 (protein binding)	-2.29837	-3.27683	0.00104979	0.0405626
WBGene00011108	187679		R07E3.7		protein_coding	GO:0016020 (membrane); GO:0016021 (integral component of membrane)	2.13386	3.26895	0.00107947	0.0416397
WBGene00007965	175497		C36A4.4	Probable UDP-N-acetylglucosamine pyrophosphorylase	protein_coding	GO:0016740 (transferase activity); GO:0005737 (cytoplasm); GO:0016779 (nucleotidyltransferase activity); GO:0070569 (uridylyltransferase activity)	-1.89272	-3.26646	0.001089	0.0418164
WBGene00019153	177359		H04M03.3		protein_coding	GO:0016491 (oxidoreductase activity); GO:0055114 (oxidation-reduction process)	-2.33442	-3.26639	0.00108929	0.0418164
WBGene00004227	191748		ptr-13	PaTched Related family	protein_coding	GO:0016020 (membrane); GO:0016021 (integral component of membrane); GO:0005886 (plasma membrane); GO:0030659 (cytoplasmic vesicle membrane); GO:0006897 (endocytosis); GO:0018996 (molting cycle, collagen and cuticulin-based cuticle); GO:0045138 (nematode male tail tip morphogenesis)	2.12559	3.26634	0.00108948	0.0418164
WBGene00011321	187940		fil-1	Fasting Induced Lipase	protein_coding	GO:0016787 (hydrolase activity); GO:0016298 (lipase activity); GO:0016042 (lipid catabolic process)	-4.28259	-3.25751	0.00112396	0.0430684
WBGene00011870	188660		T20G5.8		protein_coding		3.923	3.25681	0.00112671	0.0431023
WBGene00000630	172222		col-53	COLlagen	protein_coding	GO:0016020 (membrane); GO:0016021 (integral component of membrane); GO:0005581 (collagen trimer)	2.92731	3.25553	0.00113181	0.0432056
WBGene00013859	172895		ZC247.1		protein_coding	GO:0008289 (lipid binding); GO:0006869 (lipid transport)	1.89726	3.25519	0.00113315	0.0432056
WBGene00017576	184652		cdh-8	CaDHerin family	protein_coding	GO:0016020 (membrane); GO:0016021 (integral component of membrane); GO:0005509 (calcium ion binding); GO:0007155 (cell adhesion); GO:0098609 (cell-cell adhesion); GO:0005886 (plasma membrane); GO:0007156 (homophilic cell adhesion via plasma membrane adhesion molecules)	2.06636	3.25434	0.00113657	0.0432645
WBGene00003876	177973	6564	pept-2	Peptide transporter family 2	protein_coding	GO:0006857 (oligopeptide transport); GO:0035673 (oligopeptide transmembrane transporter activity); GO:0016021 (integral component of membrane); GO:0055085 (transmembrane transport); GO:0022857 (transmembrane transporter activity); GO:0016020 (membrane)	1.80161	3.24895	0.00115832	0.0440201
WBGene00050906	6418731		F20E11.17		protein_coding		-39.5399	-3.24835	0.00116078	0.0440411
WBGene00008580	178192		dsb-1	Double-Strand Break factor	protein_coding	GO:0000793 (condensed chromosome)	-2.17028	-3.24697	0.0011664	0.0441818
WBGene00020386	188350		cyp-34A4	CYtochrome P450 family	protein_coding	GO:0005737 (cytoplasm); GO:0046872 (metal ion binding); GO:0043231 (intracellular membrane-bounded organelle); GO:0016491 (oxidoreductase activity); GO:0004497 (monooxygenase activity); GO:0020037 (heme binding); GO:0005506 (iron ion binding); GO:0016705 (oxidoreductase activity, acting on paired donors, with incorporation or reduction of molecular oxygen); GO:0006082 (organic acid metabolic proc…	3.40526	3.24647	0.00116847	0.0441876
WBGene00004124	185539		pqn-37	Prion-like-(Q/N-rich)-domain-bearing protein	protein_coding		2.20414	3.24485	0.00117511	0.0443661
WBGene00009221	3565680	80221	acs-2	Fatty Acid CoA Synthetase family	protein_coding	GO:0006631 (fatty acid metabolic process); GO:0005739 (mitochondrion); GO:0031956 (medium-chain fatty acid-CoA ligase activity)	-1.82164	-3.24372	0.00117979	0.0444704
WBGene00008985	184742		F20G2.1		protein_coding	GO:0016491 (oxidoreductase activity); GO:0055114 (oxidation-reduction process)	3.1914	3.24188	0.00118743	0.0446128
WBGene00006916	178219		vha-7	V-type proton ATPase subunit a	protein_coding	GO:0016020 (membrane); GO:0016021 (integral component of membrane); GO:0006811 (ion transport); GO:0005886 (plasma membrane); GO:0007035 (vacuolar acidification); GO:0015078 (proton transmembrane transporter activity); GO:0016471 (vacuolar proton-transporting V-type ATPase complex); GO:0033179 (proton-transporting V-type ATPase, V0 domain); GO:0046961 (proton-transporting ATPase activity, rotatio…	-1.89966	-3.24199	0.00118698	0.0446128
WBGene00004911	181143		snf-12	Transporter	protein_coding	GO:0016020 (membrane); GO:0016021 (integral component of membrane); GO:0005887 (integral component of plasma membrane); GO:0015179 (L-amino acid transmembrane transporter activity); GO:1902475 (L-alpha-amino acid transmembrane transport); GO:0035725 (sodium ion transmembrane transport); GO:0015293 (symporter activity); GO:0008134 (transcription factor binding); GO:0030139 (endocytic vesicle); GO:…	2.94395	3.23875	0.00120057	0.0449619
WBGene00011462	181273		vap-2	Venom-Allergen-like Protein	protein_coding	GO:0005576 (extracellular region); GO:0016020 (membrane); GO:0016021 (integral component of membrane)	2.48153	3.23873	0.00120062	0.0449619
WBGene00044553	3896851		T23B12.11		protein_coding		1.89667	3.23678	0.00120887	0.0451978
WBGene00011988	172853		har-2		protein_coding	GO:0046872 (metal ion binding)	-2.0589	-3.23549	0.00121432	0.0453282
WBGene00010982	187533		flp-32	FMRF-Like Peptide	protein_coding		2.20762	3.2345	0.00121855	0.0453393
WBGene00020581	174097	133584	T19D12.6		protein_coding		1.78572	3.23481	0.00121725	0.0453393
WBGene00008546	174778	9945	gfat-1	Glutamine-Fructose 6-phosphate AminoTransferase homolog	protein_coding	GO:0016740 (transferase activity); GO:0005515 (protein binding); GO:0006487 (protein N-linked glycosylation); GO:0006048 (UDP-N-acetylglucosamine biosynthetic process); GO:0006002 (fructose 6-phosphate metabolic process); GO:0006541 (glutamine metabolic process); GO:0004360 (glutamine-fructose-6-phosphate transaminase (isomerizing) activity); GO:0006047 (UDP-N-acetylglucosamine metabolic process)…	-1.84729	-3.225	0.00125971	0.0467955
WBGene00003567	178918	6547	ncx-2	Na/Ca eXchangers	protein_coding	GO:0016020 (membrane); GO:0016021 (integral component of membrane); GO:0005886 (plasma membrane); GO:0006811 (ion transport); GO:0046872 (metal ion binding); GO:0055085 (transmembrane transport); GO:0005887 (integral component of plasma membrane); GO:0006816 (calcium ion transport); GO:0030424 (axon); GO:0042383 (sarcolemma); GO:0005516 (calmodulin binding); GO:0006814 (sodium ion transport); GO:…	1.96274	3.22346	0.00126653	0.0469733
WBGene00019939	187683		lips-17	LIPaSe related	protein_coding	GO:0016787 (hydrolase activity); GO:0016298 (lipase activity); GO:0016042 (lipid catabolic process)	2.37217	3.22241	0.00127115	0.0470694
WBGene00012763	189829		atln-2	ATLastiN (Endoplasmic reticulum GTPase) related	protein_coding	GO:0016020 (membrane); GO:0016021 (integral component of membrane); GO:0003924 (GTPase activity); GO:0005525 (GTP binding); GO:0007029 (endoplasmic reticulum organization); GO:0051260 (protein homooligomerization)	2.01399	3.21686	0.00129604	0.0474843
WBGene00017340	181766		F10D7.3	Uncharacterized monothiol glutaredoxin F10D7.3	protein_coding	GO:0005737 (cytoplasm); GO:0046872 (metal ion binding); GO:0098869 (cellular oxidant detoxification); GO:0051536 (iron-sulfur cluster binding); GO:0015035 (protein disulfide oxidoreductase activity); GO:0034599 (cellular response to oxidative stress); GO:0051537 (2 iron, 2 sulfur cluster binding); GO:0004362 (glutathione-disulfide reductase activity)	2.23105	3.21817	0.00129013	0.0474843
WBGene00008825	180077		F14H3.6		protein_coding		-1.96254	-3.21915	0.00128572	0.0474843
WBGene00018965	175769		F56D2.3		protein_coding		3.46923	3.21716	0.00129466	0.0474843
WBGene00001598	172414		glh-1	ATP-dependent RNA helicase glh-1	protein_coding	GO:0004386 (helicase activity); GO:0003676 (nucleic acid binding); GO:0005524 (ATP binding); GO:0008270 (zinc ion binding)	-1.89002	-3.2167	0.00129675	0.0474843
WBGene00021518	176965		hpo-6		protein_coding	GO:0045121 (membrane raft)	1.90949	3.21757	0.0012928	0.0474843
WBGene00007732	182915		spe-44		protein_coding	GO:0003677 (DNA binding); GO:0005634 (nucleus); GO:0046872 (metal ion binding); GO:0005515 (protein binding); GO:0005694 (chromosome); GO:0000978 (RNA polymerase II cis-regulatory region sequence-specific DNA binding); GO:0001228 (DNA-binding transcription activator activity, RNA polymerase II-specific); GO:0045944 (positive regulation of transcription by RNA polymerase II); GO:0030849 (autosome)…	-3.17441	-3.21822	0.00128987	0.0474843
WBGene00000219	179209		asp-6	Aspartic protease 6	protein_coding	GO:0004190 (aspartic-type endopeptidase activity); GO:0006508 (proteolysis)	-1.77073	-3.21378	0.00130999	0.0478934
WBGene00009530	185450		F38B2.3		protein_coding		-2.09327	-3.20898	0.00133206	0.0486234
WBGene00001448	181104		flp-5	FMRFamide-like neuropeptides 5 APKPKFIRF-amide AGAKFIRF-amide GAKFIRF-amide	protein_coding	GO:0007218 (neuropeptide signaling pathway)	1.89033	3.20556	0.00134801	0.0491281
WBGene00018403	179311		F44A2.3		protein_coding	GO:0005615 (extracellular space); GO:0008289 (lipid binding)	2.1815	3.20351	0.00135764	0.0494011
WBGene00007454	182422		C08F11.7		protein_coding		10.2015	3.2023	0.00136335	0.0494529
WBGene00016017	182816		C23G10.11		protein_coding		-5.94046	-3.20235	0.00136313	0.0494529
WBGene00017071	177632	8972	aagr-1	Acid Alpha Glucosidase Relate	protein_coding	GO:0016020 (membrane); GO:0003824 (catalytic activity); GO:0008152 (metabolic process); GO:0016787 (hydrolase activity); GO:0016798 (hydrolase activity, acting on glycosyl bonds); GO:0005975 (carbohydrate metabolic process); GO:0030246 (carbohydrate binding); GO:0004553 (hydrolase activity, hydrolyzing O-glycosyl compounds); GO:0005764 (lysosome); GO:0004558 (alpha-1,4-glucosidase activity); GO:0…	-2.2665	-3.20067	0.00137106	0.0496549
WBGene00012610	189674		Y38F1A.8		protein_coding	GO:0016020 (membrane); GO:0016021 (integral component of membrane); GO:0005789 (endoplasmic reticulum membrane); GO:0006506 (GPI anchor biosynthetic process); GO:0000139 (Golgi membrane)	2.0068	3.1998	0.00137524	0.0497283
WBGene00001067	172197		dpy-5	Cuticle collagen dpy-5	protein_coding	GO:0042302 (structural constituent of cuticle)	8.65092	3.19598	0.00139356	0.0501895
WBGene00011141	3565685		nlp-66	Neuropeptide-Like Protein	protein_coding	GO:0007218 (neuropeptide signaling pathway)	3.95136	3.19578	0.00139451	0.0501895
WBGene00013101	190146		Y51H4A.5		protein_coding	GO:0006629 (lipid metabolic process)	-8.47869	-3.19625	0.00139229	0.0501895
WBGene00044301	3565225		lgc-28	Ligand-Gated ion Channel	protein_coding	GO:0016020 (membrane); GO:0016021 (integral component of membrane); GO:0004888 (transmembrane signaling receptor activity); GO:0005216 (ion channel activity); GO:0005230 (extracellular ligand-gated ion channel activity); GO:0006811 (ion transport); GO:0034220 (ion transmembrane transport); GO:0042391 (regulation of membrane potential); GO:0007268 (chemical synaptic transmission); GO:0043005 (neur…	-2.02414	-3.18815	0.00143187	0.0514539
WBGene00001398	178122		fat-6	Delta(9)-fatty-acid desaturase fat-6	protein_coding	GO:0016717 (oxidoreductase activity, acting on paired donors, with oxidation of a pair of donors resulting in the reduction of molecular oxygen to two molecules of water); GO:0055114 (oxidation-reduction process); GO:0006629 (lipid metabolic process)	-1.83349	-3.18732	0.00143599	0.0515217
WBGene00004222	174678		ptr-8	PaTched Related family	protein_coding	GO:0016020 (membrane); GO:0016021 (integral component of membrane); GO:0005886 (plasma membrane); GO:0030659 (cytoplasmic vesicle membrane); GO:0006897 (endocytosis); GO:0018996 (molting cycle, collagen and cuticulin-based cuticle); GO:0045138 (nematode male tail tip morphogenesis)	1.83843	3.18476	0.00144876	0.0518992
WBGene00020149	173403		T01D1.4	1,2-dihydroxy-3-keto-5-methylthiopentene dioxygenase homolog 1	protein_coding	GO:0005634 (nucleus); GO:0005737 (cytoplasm); GO:0016491 (oxidoreductase activity); GO:0010309 (acireductone dioxygenase [iron(II)-requiring] activity); GO:0051213 (dioxygenase activity); GO:0008652 (cellular amino acid biosynthetic process); GO:0006555 (methionine metabolic process); GO:0009086 (methionine biosynthetic process); GO:0016702 (oxidoreductase activity, acting on single donors with i…	1.85103	3.1813	0.00146616	0.0524414
WBGene00003878	172298	6565	pept-3	Peptide transporter 3	protein_coding	GO:0042938 (dipeptide transport); GO:0071916 (dipeptide transmembrane transporter activity); GO:0015252 (proton channel activity); GO:0006857 (oligopeptide transport); GO:0035673 (oligopeptide transmembrane transporter activity); GO:1902600 (proton transmembrane transport); GO:0016021 (integral component of membrane); GO:0055085 (transmembrane transport); GO:0022857 (transmembrane transporter act…	1.85336	3.17873	0.00147923	0.052827
WBGene00018567	185936		F47E1.3		protein_coding	GO:0005634 (nucleus); GO:0000977 (RNA polymerase II transcription regulatory region sequence-specific DNA binding); GO:0006357 (regulation of transcription by RNA polymerase II); GO:0010468 (regulation of gene expression); GO:0034972 (histone H3-R26 methylation)	3.41906	3.17776	0.00148419	0.0529223
WBGene00016419	172263		tyr-4	TYRosinase	protein_coding	GO:0016491 (oxidoreductase activity); GO:0005507 (copper ion binding); GO:0016716 (oxidoreductase activity, acting on paired donors, with incorporation or reduction of molecular oxygen, another compound as one donor, and incorporation of one atom of oxygen); GO:0042438 (melanin biosynthetic process); GO:0033162 (melanosome membrane); GO:0055114 (oxidation-reduction process)	2.12191	3.17722	0.00148694	0.0529387
WBGene00016799	183641		C50C3.1		protein_coding	GO:0046872 (metal ion binding)	-2.18166	-3.17363	0.00150545	0.0529773
WBGene00018217	179169		F40A3.2		protein_coding	GO:0016020 (membrane); GO:0016021 (integral component of membrane)	1.93684	3.17469	0.00149998	0.0529773
WBGene00016486	183273		fbxa-170	F-box A protein	protein_coding	GO:0005515 (protein binding)	-2.49725	-3.17395	0.00150377	0.0529773
WBGene00010787	174822		K12D12.5		protein_coding	GO:0003676 (nucleic acid binding); GO:0004523 (RNA-DNA hybrid ribonuclease activity); GO:0043137 (DNA replication, removal of RNA primer); GO:0090502 (RNA phosphodiester bond hydrolysis, endonucleolytic)	-2.13924	-3.17501	0.00149834	0.0529773
WBGene00007966	175498		maph-1.3	Microtubule-Associated Protein Homolog	protein_coding	GO:0003779 (actin binding); GO:0005829 (cytosol); GO:0045202 (synapse); GO:0008017 (microtubule binding); GO:0000226 (microtubule cytoskeleton organization); GO:0043025 (neuronal cell body); GO:0005874 (microtubule); GO:0030425 (dendrite); GO:0007409 (axonogenesis); GO:0005875 (microtubule associated complex); GO:0016358 (dendrite development); GO:0031114 (regulation of microtubule depolymerizati…	-1.9251	-3.17491	0.00149883	0.0529773
WBGene00004823	174257		skr-17	SKR-17; SKp1 Related (Ubiquitin ligase complex component)	protein_coding	GO:0005634 (nucleus); GO:0005737 (cytoplasm); GO:0006511 (ubiquitin-dependent protein catabolic process); GO:0016567 (protein ubiquitination); GO:0031146 (SCF-dependent proteasomal ubiquitin-dependent protein catabolic process); GO:0097602 (cullin family protein binding)	-2.11918	-3.17345	0.00150636	0.0529773
WBGene00004990	180994		spp-5	SaPosin-like Protein family	protein_coding	GO:0055085 (transmembrane transport); GO:0050829 (defense response to Gram-negative bacterium); GO:0050830 (defense response to Gram-positive bacterium); GO:0015267 (channel activity)	-1.76415	-3.17483	0.00149922	0.0529773
WBGene00021979	190383		Y58A7A.5		protein_coding		-2.00994	-3.17627	0.00149184	0.0529773
WBGene00008486	177939		ugt-44	UDP-GlucuronosylTransferase	protein_coding	GO:0016020 (membrane); GO:0016021 (integral component of membrane); GO:0016740 (transferase activity); GO:0043231 (intracellular membrane-bounded organelle); GO:0015020 (glucuronosyltransferase activity); GO:0016757 (transferase activity, transferring glycosyl groups); GO:0045087 (innate immune response); GO:0008194 (UDP-glycosyltransferase activity)	-3.26789	-3.16454	0.00155328	0.0545441
WBGene00016424	176963		C34H4.1		protein_coding	GO:0045087 (innate immune response); GO:0016020 (membrane); GO:0016021 (integral component of membrane)	1.89217	3.16333	0.00155973	0.0546876
WBGene00004878	177044	4891	smf-3	NRAMP-like transporter smf-3	protein_coding	GO:0030001 (metal ion transport); GO:0046873 (metal ion transmembrane transporter activity); GO:0016020 (membrane)	-3.63782	-3.16112	0.00157165	0.055022
WBGene00021470	171786		tpxl-1	TPX2 (Targeting Protein for Xenopus Klp2)-Like; TPX2-related alternative variant b	protein_coding	GO:0005515 (protein binding); GO:0019901 (protein kinase binding); GO:0000235 (astral microtubule); GO:0005813 (centrosome); GO:0005874 (microtubule); GO:0030953 (astral microtubule organization); GO:0072687 (meiotic spindle); GO:0044877 (protein-containing complex binding); GO:0090307 (mitotic spindle assembly); GO:0031616 (spindle pole centrosome)	-1.85875	-3.15844	0.00158614	0.0554455
WBGene00001068	181099		dpy-6	DumPY: shorter than wild-type	protein_coding	GO:0005516 (calmodulin binding)	3.01987	3.15563	0.00160152	0.0558983
WBGene00015427	353442		C04E6.13		protein_coding		2.10619	3.15189	0.00162216	0.0564483
WBGene00018613	175749	6502	skpt-1	SKP2 (S phase Kinase associated Protein Two) homolog	protein_coding	GO:0005634 (nucleus); GO:0005829 (cytosol); GO:0051726 (regulation of cell cycle); GO:0019005 (SCF ubiquitin ligase complex); GO:0031146 (SCF-dependent proteasomal ubiquitin-dependent protein catabolic process); GO:0000086 (G2/M transition of mitotic cell cycle); GO:0005515 (protein binding)	-1.9912	-3.15226	0.0016201	0.0564483
WBGene00001066	178414		dpy-4	DumPY: shorter than wild-type	protein_coding	GO:0016020 (membrane); GO:0016021 (integral component of membrane); GO:0005615 (extracellular space); GO:0030198 (extracellular matrix organization); GO:0042302 (structural constituent of cuticle); GO:0005201 (extracellular matrix structural constituent); GO:0031012 (extracellular matrix); GO:0042338 (cuticle development involved in collagen and cuticulin-based cuticle molting cycle)	5.74515	3.14992	0.00163316	0.0567456
WBGene00021153	189354		Y4C6A.3		protein_coding	GO:0016020 (membrane); GO:0016021 (integral component of membrane); GO:0046872 (metal ion binding)	-2.06378	-3.14833	0.00164207	0.0569694
WBGene00010573	176315		K04H4.2		protein_coding	GO:0005576 (extracellular region); GO:0008061 (chitin binding)	2.57845	3.143	0.00167227	0.0578434
WBGene00010421	186798		slc-36.4	SLC (SoLute Carrier) homolog	protein_coding	GO:0016020 (membrane); GO:0016021 (integral component of membrane); GO:1902475 (L-alpha-amino acid transmembrane transport); GO:0003333 (amino acid transmembrane transport); GO:0015171 (amino acid transmembrane transporter activity); GO:0015179 (L-amino acid transmembrane transporter activity); GO:0015807 (L-amino acid transport)	2.05598	3.14305	0.00167195	0.0578434
WBGene00010839	176457	1663	chl-1	ATP-dependent DNA helicase chl-1	protein_coding	GO:0004386 (helicase activity); GO:0003678 (DNA helicase activity); GO:0006139 (nucleobase-containing compound metabolic process); GO:0003676 (nucleic acid binding); GO:0016818 (hydrolase activity, acting on acid anhydrides, in phosphorus-containing anhydrides); GO:0005524 (ATP binding); GO:0003677 (DNA binding)	-2.112	-3.14182	0.00167902	0.0579903
WBGene00009301	185176		F31F6.2		protein_coding		-3.82271	-3.13804	0.00170085	0.0585689
WBGene00022040	190488		Y65B4BR.1		protein_coding	GO:0006644 (phospholipid metabolic process); GO:0004620 (phospholipase activity); GO:0016788 (hydrolase activity, acting on ester bonds)	2.03707	3.13811	0.00170042	0.0585689
WBGene00000601	179453		col-12	Cuticle collagen 12	protein_coding	GO:0042302 (structural constituent of cuticle)	2.98343	3.13684	0.00170782	0.0586357
WBGene00008536	178373		F02H6.3		protein_coding		-2.20099	-3.13683	0.00170786	0.0586357
WBGene00006163	191997		str-112	Seven TM Receptor	protein_coding	GO:0016020 (membrane); GO:0016021 (integral component of membrane); GO:0005887 (integral component of plasma membrane); GO:0050911 (detection of chemical stimulus involved in sensory perception of smell); GO:0007186 (G protein-coupled receptor signaling pathway); GO:0038022 (G protein-coupled olfactory receptor activity); GO:0042048 (olfactory behavior)	6.25981	3.13622	0.00171141	0.0586703
WBGene00019885	187608		R05D8.7		protein_coding	GO:0000166 (nucleotide binding); GO:0016491 (oxidoreductase activity); GO:0055114 (oxidation-reduction process)	3.48145	3.13461	0.00172082	0.0589055
WBGene00000606	173839		col-17	COLlagen	protein_coding	GO:0005581 (collagen trimer)	20.2337	3.13379	0.00172564	0.0589266
WBGene00009865	173297	64167	F49B2.6	Aminopeptidase	protein_coding	GO:0016020 (membrane); GO:0016021 (integral component of membrane); GO:0005737 (cytoplasm); GO:0016787 (hydrolase activity); GO:0046872 (metal ion binding); GO:0008270 (zinc ion binding); GO:0006508 (proteolysis); GO:0008233 (peptidase activity); GO:0008237 (metallopeptidase activity); GO:0042277 (peptide binding); GO:0004177 (aminopeptidase activity); GO:0043171 (peptide catabolic process); GO:0…	1.9664	3.13364	0.00172654	0.0589266
WBGene00019699	173482		math-34	MATH (Meprin-associated Traf homology) domain containing	protein_coding	GO:0005515 (protein binding)	-4.77059	-3.13319	0.00172919	0.0589303
WBGene00021740	190093		Y50D4B.1		protein_coding		2.00303	3.13263	0.00173251	0.0589562
WBGene00008740	174799		F13D12.5		protein_coding	GO:0016020 (membrane); GO:0016021 (integral component of membrane)	-2.08088	-3.13207	0.00173579	0.0589812
WBGene00019578	187223		K09E3.7		protein_coding		-2.61913	-3.13129	0.0017404	0.0590509
WBGene00010048	174774		F54D5.2		protein_coding		-2.18951	-3.12981	0.00174917	0.0592616
WBGene00003395	179217		mom-2		protein_coding	GO:0016055 (Wnt signaling pathway); GO:0005102 (signaling receptor binding); GO:0007275 (multicellular organism development); GO:0005576 (extracellular region)	-1.90954	-3.12927	0.0017524	0.0592839
WBGene00044389	3565138		C27D6.12		protein_coding		1.96254	3.12835	0.00175793	0.0593842
WBGene00022420	190860		wdr-4	tRNA (guanine-N(7)-)-methyltransferase non-catalytic subunit	protein_coding	GO:0005634 (nucleus); GO:0005829 (cytosol); GO:0008033 (tRNA processing); GO:0030488 (tRNA methylation); GO:0036265 (RNA (guanine-N7)-methylation); GO:0008176 (tRNA (guanine-N7-)-methyltransferase activity); GO:0106004 (tRNA (guanine-N7)-methylation); GO:0043527 (tRNA methyltransferase complex); GO:0005515 (protein binding); GO:0008168 (methyltransferase activity); GO:0032259 (methylation); GO:00…	-1.8465	-3.1255	0.00177504	0.0598746
WBGene00022816	176076		fbn-1	FiBrilliN homolog	protein_coding	GO:0016020 (membrane); GO:0016021 (integral component of membrane); GO:0005509 (calcium ion binding)	1.83872	3.12477	0.00177943	0.0599352
WBGene00016264	183055		C30F12.5		protein_coding	GO:0016020 (membrane); GO:0016021 (integral component of membrane); GO:0005892 (acetylcholine-gated channel complex)	1.90947	3.12339	0.00178781	0.0600372
WBGene00009447	185325		F35H8.2		protein_coding	GO:0016020 (membrane); GO:0016021 (integral component of membrane); GO:0016740 (transferase activity); GO:0000139 (Golgi membrane); GO:0016757 (transferase activity, transferring glycosyl groups)	2.57267	3.12299	0.00179025	0.0600372
WBGene00018865	186280		F55A12.6		protein_coding		2.16434	3.12355	0.00178681	0.0600372
WBGene00009006	177678	5238	F21D5.1	Phosphoacetylglucosamine mutase	protein_coding	GO:0046872 (metal ion binding); GO:0000287 (magnesium ion binding); GO:0005975 (carbohydrate metabolic process); GO:0016853 (isomerase activity); GO:0006048 (UDP-N-acetylglucosamine biosynthetic process); GO:0016868 (intramolecular transferase activity, phosphotransferases); GO:0071704 (organic substance metabolic process); GO:0004610 (phosphoacetylglucosamine mutase activity)	-1.79199	-3.12208	0.0017958	0.0601359
WBGene00007827	259607		trh-1	THR-like peptide hormone	protein_coding		2.32499	3.1202	0.00180726	0.060432
WBGene00017460	173678		bath-30	BTB and MATH domain containing	protein_coding	GO:0005515 (protein binding)	-2.10612	-3.11939	0.00181227	0.0605119
WBGene00000670	176602		col-95	COLlagen	protein_coding	GO:0016020 (membrane); GO:0016021 (integral component of membrane); GO:0042302 (structural constituent of cuticle)	1.81416	3.11781	0.00182198	0.0607484
WBGene00007214	173208		C01A2.2		protein_coding	GO:0016020 (membrane); GO:0016021 (integral component of membrane)	2.12223	3.11586	0.00183407	0.0610634
WBGene00021772	173526		math-45	MATH (Meprin-associated Traf homology) domain containing	protein_coding	GO:0005515 (protein binding)	-4.82572	-3.11493	0.00183989	0.0611691
WBGene00044719	4363071		clec-172	C-type LECtin	protein_coding	GO:0030246 (carbohydrate binding); GO:0050830 (defense response to Gram-positive bacterium)	-5.01188	-3.1123	0.00185637	0.0613178
WBGene00003759	176570		nlp-21	Neuropeptide-Like Protein	protein_coding	GO:0007218 (neuropeptide signaling pathway)	1.90786	3.11327	0.00185025	0.0613178
WBGene00011152	187722		R09A8.1		protein_coding		-3.19329	-3.1121	0.00185763	0.0613178
WBGene00010790	179627		sodh-1	Alcohol dehydrogenase 1	protein_coding	GO:0016491 (oxidoreductase activity); GO:0055114 (oxidation-reduction process); GO:0008270 (zinc ion binding)	-2.05556	-3.11243	0.00185555	0.0613178
WBGene00012481	173153		Y18D10A.11		protein_coding	GO:0016020 (membrane); GO:0016021 (integral component of membrane)	-1.84649	-3.11344	0.00184919	0.0613178
WBGene00019957	180758		R08E3.1		protein_coding	GO:0005112 (Notch binding)	1.84513	3.11143	0.00186187	0.0613699
WBGene00011994	174727		samp-1	Transmembrane protein 201 homolog	protein_coding	GO:0016020 (membrane); GO:0016021 (integral component of membrane); GO:0005634 (nucleus); GO:0051015 (actin filament binding); GO:0031965 (nuclear membrane); GO:0005637 (nuclear inner membrane); GO:0005521 (lamin binding); GO:0005639 (integral component of nuclear inner membrane); GO:0030473 (nuclear migration along microtubule); GO:0009792 (embryo development ending in birth or egg hatching); GO…	-1.85571	-3.10925	0.00187562	0.0617352
WBGene00011399	176760	132789	T03F6.3	Probable glucosamine-6-phosphate isomerase	protein_coding	GO:0005737 (cytoplasm); GO:0016787 (hydrolase activity); GO:0005975 (carbohydrate metabolic process); GO:0006048 (UDP-N-acetylglucosamine biosynthetic process); GO:0042802 (identical protein binding); GO:0006044 (N-acetylglucosamine metabolic process); GO:0006046 (N-acetylglucosamine catabolic process); GO:0004342 (glucosamine-6-phosphate deaminase activity); GO:0006043 (glucosamine catabolic pro…	-1.7793	-3.10647	0.00189336	0.0622304
WBGene00008482	184037		cut-4	CUTiclin	protein_coding	GO:0016020 (membrane); GO:0016021 (integral component of membrane); GO:0005886 (plasma membrane); GO:0042302 (structural constituent of cuticle)	1.95154	3.10413	0.00190839	0.0626023
WBGene00012716	176735		Y39E4B.5		protein_coding	GO:0016020 (membrane); GO:0016021 (integral component of membrane); GO:0022857 (transmembrane transporter activity); GO:0055085 (transmembrane transport)	-1.99174	-3.10387	0.00191009	0.0626023
WBGene00022462	172142		Y110A7A.15		protein_coding		-2.07738	-3.1023	0.00192023	0.0628452
WBGene00009213	185060		thn-1	THaumatiN family	protein_coding	GO:0045087 (innate immune response); GO:0050829 (defense response to Gram-negative bacterium); GO:0005576 (extracellular region); GO:0003674 (molecular_function)	-4.70116	-3.10031	0.0019332	0.063091
WBGene00021014	189170		W03G9.2		protein_coding		-2.20036	-3.10033	0.00193303	0.063091
WBGene00006944	174081	7486	wrn-1	Probable Werner syndrome ATP-dependent helicase homolog 1	protein_coding	GO:0005634 (nucleus); GO:0005524 (ATP binding); GO:0005737 (cytoplasm); GO:0016787 (hydrolase activity); GO:0000166 (nucleotide binding); GO:0004386 (helicase activity); GO:0003676 (nucleic acid binding); GO:0003677 (DNA binding); GO:0006281 (DNA repair); GO:0006260 (DNA replication); GO:0000723 (telomere maintenance); GO:0005654 (nucleoplasm); GO:0000724 (double-strand break repair via homologou…	-2.03398	-3.09949	0.00193853	0.0631759
WBGene00015817	173755		C16A11.4		protein_coding	GO:0005634 (nucleus); GO:0046872 (metal ion binding)	-2.00457	-3.09787	0.00194919	0.0634337
WBGene00194921	13213791		ZK742.7		protein_coding		3.18247	3.09506	0.00196774	0.0639475
WBGene00003778	180884	23530	nnt-1	Nicotinamide Nucleotide Transhydrogenase	protein_coding	GO:0016020 (membrane); GO:0016021 (integral component of membrane); GO:1902600 (proton transmembrane transport); GO:0006740 (NADPH regeneration); GO:0008746 (NAD(P)+ transhydrogenase activity); GO:0050661 (NADP binding); GO:0051287 (NAD binding); GO:0005739 (mitochondrion); GO:0055114 (oxidation-reduction process)	-1.84326	-3.093	0.00198142	0.0643017
WBGene00004049	266823	142	parp-1	Poly [ADP-ribose] polymerase 1	protein_coding	GO:0006471 (protein ADP-ribosylation); GO:0003950 (NAD+ ADP-ribosyltransferase activity); GO:0051287 (NAD binding); GO:0005634 (nucleus); GO:0008270 (zinc ion binding); GO:0003677 (DNA binding); GO:0016740 (transferase activity); GO:0016757 (transferase activity, transferring glycosyl groups)	-1.86143	-3.08439	0.00203971	0.0661002
WBGene00010251	3565291		sta-2	Signal transducer and activator of transcription b	protein_coding	GO:0003677 (DNA binding); GO:0005634 (nucleus); GO:0005737 (cytoplasm); GO:0007165 (signal transduction); GO:0003700 (DNA-binding transcription factor activity); GO:0006355 (regulation of transcription, DNA-templated); GO:0042127 (regulation of cell population proliferation); GO:0007275 (multicellular organism development); GO:0000978 (RNA polymerase II cis-regulatory region sequence-specific DNA…	2.00658	3.08254	0.0020524	0.0664186
WBGene00007709	172885		clec-87	C-type lectin domain-containing protein 87	protein_coding		-1.84177	-3.07973	0.00207187	0.0669248
WBGene00000675	176854		col-101	COLlagen	protein_coding	GO:0016020 (membrane); GO:0016021 (integral component of membrane); GO:0042302 (structural constituent of cuticle)	1.864	3.07945	0.00207384	0.0669248
WBGene00011733	176797		T12D8.5		protein_coding		-1.84347	-3.07844	0.00208089	0.0670586
WBGene00013643	190882		Y105C5A.24		protein_coding	GO:0005524 (ATP binding); GO:0004672 (protein kinase activity); GO:0006468 (protein phosphorylation); GO:0016301 (kinase activity); GO:0016310 (phosphorylation); GO:0000166 (nucleotide binding); GO:0016740 (transferase activity); GO:0007165 (signal transduction); GO:0004674 (protein serine/threonine kinase activity); GO:0000287 (magnesium ion binding); GO:0000186 (activation of MAPKK activity); G…	-1.9303	-3.07785	0.002085	0.0670976
WBGene00015163	176033		B0361.9		protein_coding		1.86065	3.07592	0.00209856	0.0673037
WBGene00044530	3896832		F32D1.11		protein_coding		2.04503	3.07646	0.00209475	0.0673037
WBGene00007048	175902	4799	nfx-1	Transcriptional repressor NF-X1 homolog	protein_coding	GO:0003676 (nucleic acid binding); GO:0003700 (DNA-binding transcription factor activity); GO:0005634 (nucleus); GO:0008270 (zinc ion binding); GO:0006355 (regulation of transcription, DNA-templated)	-1.83291	-3.07569	0.00210015	0.0673037
WBGene00012110	176781		T28A8.4		protein_coding		-2.09276	-3.07455	0.00210818	0.0674677
WBGene00001374	179003		exp-2		protein_coding	GO:0016020 (membrane); GO:0016021 (integral component of membrane); GO:0005216 (ion channel activity); GO:0006811 (ion transport); GO:0055085 (transmembrane transport); GO:0071805 (potassium ion transmembrane transport); GO:0005244 (voltage-gated ion channel activity); GO:0034765 (regulation of ion transmembrane transport); GO:0005249 (voltage-gated potassium channel activity); GO:0005267 (potass…	2.02275	3.07238	0.00212362	0.0677741
WBGene00004228	177951		ptr-14	PaTched Related family	protein_coding	GO:0016020 (membrane); GO:0016021 (integral component of membrane); GO:0005886 (plasma membrane); GO:0022857 (transmembrane transporter activity); GO:0055085 (transmembrane transport); GO:0030659 (cytoplasmic vesicle membrane); GO:0006897 (endocytosis); GO:0018996 (molting cycle, collagen and cuticulin-based cuticle); GO:0045138 (nematode male tail tip morphogenesis)	1.95713	3.07253	0.00212253	0.0677741
WBGene00011102	181242		R07E3.1		protein_coding	GO:0016020 (membrane); GO:0016021 (integral component of membrane); GO:0005764 (lysosome); GO:0006508 (proteolysis); GO:0004197 (cysteine-type endopeptidase activity); GO:0005615 (extracellular space); GO:0008234 (cysteine-type peptidase activity); GO:0051603 (proteolysis involved in cellular protein catabolic process)	-1.86638	-3.07012	0.00213973	0.0681941
WBGene00021980	190384		glb-32	GLoBin related	protein_coding	GO:0019825 (oxygen binding); GO:0020037 (heme binding); GO:0005344 (oxygen carrier activity); GO:0015671 (oxygen transport)	2.80123	3.06944	0.00214462	0.0682557
WBGene00004086	176663		pph-4.2	Serine/threonine-protein phosphatase 4 catalytic subunit 2	protein_coding	GO:0016787 (hydrolase activity); GO:0006470 (protein dephosphorylation); GO:0004722 (protein serine/threonine phosphatase activity); GO:0106306 (protein serine phosphatase activity); GO:0106307 (protein threonine phosphatase activity)	-1.87016	-3.06512	0.0021758	0.0691527
WBGene00009302	185177		F31F6.3		protein_coding		-7.1085	-3.06278	0.00219293	0.0693922
WBGene00021417	189677		nhr-236	Nuclear Hormone Receptor family	protein_coding	GO:0005634 (nucleus); GO:0046872 (metal ion binding); GO:0003700 (DNA-binding transcription factor activity); GO:0006355 (regulation of transcription, DNA-templated); GO:0008270 (zinc ion binding); GO:0043565 (sequence-specific DNA binding); GO:0003677 (DNA binding); GO:0004879 (nuclear receptor activity); GO:0030522 (intracellular receptor signaling pathway); GO:0000978 (RNA polymerase II cis-re…	8.83841	3.06315	0.00219022	0.0693922
WBGene00005003	185015		spp-18	SaPosin-like Protein family	protein_coding	GO:0045087 (innate immune response)	-2.18746	-3.0632	0.00218982	0.0693922
WBGene00012407	181666		Y7A5A.1		protein_coding	GO:0016020 (membrane); GO:0016021 (integral component of membrane); GO:0005737 (cytoplasm); GO:0016491 (oxidoreductase activity); GO:0050660 (flavin adenine dinucleotide binding); GO:0071949 (FAD binding); GO:0000246 (delta24(24-1) sterol reductase activity); GO:0008202 (steroid metabolic process); GO:0016628 (oxidoreductase activity, acting on the CH-CH group of donors, NAD or NADP as acceptor);…	-1.91669	-3.06245	0.00219535	0.0693922
WBGene00010001	186181		F53F8.4		protein_coding		1.81851	3.06147	0.00220252	0.0694334
WBGene00011822	188575		T18D3.5		protein_coding	GO:0016020 (membrane); GO:0016021 (integral component of membrane)	2.06635	3.06145	0.00220266	0.0694334
WBGene00000212	181323	6609	asm-2	Sphingomyelin phosphodiesterase 2	protein_coding	GO:0006685 (sphingomyelin catabolic process); GO:0004767 (sphingomyelin phosphodiesterase activity); GO:0006629 (lipid metabolic process); GO:0016787 (hydrolase activity)	-2.57676	-3.06074	0.0022079	0.0694877
WBGene00018585	185962		F48A11.4		protein_coding		-1.94093	-3.0604	0.0022104	0.0694877
WBGene00009056	3565467		F22D6.15		protein_coding		2.36079	3.05921	0.00221925	0.0696712
WBGene00006555	191435		tbx-36	Putative T-box protein 36	protein_coding	GO:0005634 (nucleus); GO:0003700 (DNA-binding transcription factor activity); GO:0006355 (regulation of transcription, DNA-templated); GO:0003677 (DNA binding); GO:0000978 (RNA polymerase II cis-regulatory region sequence-specific DNA binding); GO:0000981 (DNA-binding transcription factor activity, RNA polymerase II-specific); GO:0006357 (regulation of transcription by RNA polymerase II); GO:0001…	-2.66929	-3.05872	0.00222282	0.0696886
WBGene00016785	28661643		C49G7.7		protein_coding		-2.99076	-3.05807	0.00222767	0.0697461
WBGene00008561	174408		F07H5.10		protein_coding	GO:0005634 (nucleus); GO:0016787 (hydrolase activity); GO:0046872 (metal ion binding); GO:0000166 (nucleotide binding); GO:0003723 (RNA binding); GO:0005829 (cytosol); GO:0004518 (nuclease activity); GO:0000956 (nuclear-transcribed mRNA catabolic process); GO:0090305 (nucleic acid phosphodiester bond hydrolysis); GO:0034353 (); GO:0110155 (NAD-cap decapping)	-2.11754	-3.05731	0.00223331	0.0697604
WBGene00021853	175374		Y54F10AM.11		protein_coding	GO:0005515 (protein binding)	-2.32054	-3.0572	0.00223417	0.0697604
WBGene00011262	179621	55	pho-8	Intestinal acid PHOsphatase	protein_coding	GO:0016311 (dephosphorylation); GO:0016791 (phosphatase activity)	6.05428	3.056	0.00224308	0.0698962
WBGene00012783	189848		Y43C5A.3		protein_coding	GO:0050829 (defense response to Gram-negative bacterium); GO:0003690 (double-stranded DNA binding); GO:0031640 (killing of cells of other organism)	1.89834	3.05581	0.00224457	0.0698962
WBGene00011559	176453		umps-1	Uridine 5'-monophosphate synthase Orotate phosphoribosyltransferase Orotidine 5'-phosphate decarboxylase	protein_coding	GO:0003824 (catalytic activity); GO:0008152 (metabolic process); GO:0016740 (transferase activity); GO:0005737 (cytoplasm); GO:0016757 (transferase activity, transferring glycosyl groups); GO:0016829 (lyase activity); GO:0006207 ('de novo' pyrimidine nucleobase biosynthetic process); GO:0006221 (pyrimidine nucleotide biosynthetic process); GO:0008340 (determination of adult lifespan); GO:0048557 …	-1.82579	-3.05467	0.0022531	0.0700676
WBGene00018375	180754		F43C9.1		protein_coding	GO:0005515 (protein binding)	-2.34463	-3.05362	0.00226102	0.0702192
WBGene00019141	186650		bath-5	BTB and MATH domain containing	protein_coding	GO:0005515 (protein binding)	-2.4279	-3.05253	0.00226919	0.0703785
WBGene00007797	179501		C29A12.1		protein_coding		-2.09576	-3.05104	0.00228053	0.0706354
WBGene00016945	183842		sulp-1	SULfate Permease family	protein_coding	GO:0016020 (membrane); GO:0016021 (integral component of membrane); GO:0055085 (transmembrane transport); GO:1902476 (chloride transmembrane transport); GO:0005887 (integral component of plasma membrane); GO:0008271 (secondary active sulfate transmembrane transporter activity); GO:0008272 (sulfate transport); GO:0015106 (bicarbonate transmembrane transporter activity); GO:0015108 (chloride transm…	2.66545	3.04709	0.00231065	0.0714725
WBGene00011835	179556		T19B10.8	GPI inositol-deacylase	protein_coding	GO:0016020 (membrane); GO:0016021 (integral component of membrane); GO:0016787 (hydrolase activity); GO:0015031 (protein transport); GO:0005783 (endoplasmic reticulum); GO:0006888 (endoplasmic reticulum to Golgi vesicle-mediated transport); GO:0016788 (hydrolase activity, acting on ester bonds); GO:0005789 (endoplasmic reticulum membrane); GO:0006505 (GPI anchor metabolic process); GO:0050185 (ph…	-1.79422	-3.04655	0.00231482	0.0715055
WBGene00003750	171753		nlp-12	Neuropeptide-Like Protein	protein_coding	GO:0007218 (neuropeptide signaling pathway); GO:0043025 (neuronal cell body); GO:0043005 (neuron projection); GO:0060756 (foraging behavior); GO:0005615 (extracellular space); GO:0031739 (cholecystokinin receptor binding)	-1.76181	-3.0459	0.00231987	0.071566
WBGene00194658	13197764		R09E10.13		protein_coding		2.12644	3.0451	0.002326	0.0716594
WBGene00000022	178559	21	abt-4	ABC Transporter family	protein_coding	GO:0016020 (membrane); GO:0016021 (integral component of membrane); GO:0005524 (ATP binding); GO:0042626 (ATPase-coupled transmembrane transporter activity); GO:0000166 (nucleotide binding); GO:0043231 (intracellular membrane-bounded organelle); GO:0055085 (transmembrane transport); GO:0005319 (lipid transporter activity); GO:0006869 (lipid transport); GO:0016887 (ATPase activity)	1.96933	3.04229	0.00234782	0.0718981
WBGene00001110	179586		duo-1	Deubiquitylating with USP/UBP and OTU domains	protein_coding	GO:0006511 (ubiquitin-dependent protein catabolic process); GO:0016579 (protein deubiquitination); GO:0004843 (thiol-dependent ubiquitin-specific protease activity)	-2.21911	-3.0421	0.00234931	0.0718981
WBGene00010226	176355		F58A4.1		protein_coding		3.13691	3.04303	0.00234211	0.0718981
WBGene00004988	180993		spp-3	SaPosin-like Protein family	protein_coding	GO:0045087 (innate immune response); GO:0050829 (defense response to Gram-negative bacterium); GO:0050830 (defense response to Gram-positive bacterium); GO:0042802 (identical protein binding); GO:0032991 (protein-containing complex)	-1.75415	-3.04257	0.00234571	0.0718981
WBGene00006931	177764		vps-26	Vacuolar protein sorting-associated protein 26	protein_coding	GO:0006886 (intracellular protein transport); GO:0015031 (protein transport); GO:0005829 (cytosol); GO:0030904 (retromer complex); GO:0042147 (retrograde transport, endosome to Golgi); GO:0005768 (endosome)	-1.78398	-3.04216	0.00234889	0.0718981
WBGene00020341	188269		T08B1.4		protein_coding	GO:0006629 (lipid metabolic process)	1.8355	3.04035	0.00236302	0.0722222
WBGene00017416	184407		F13B6.1		protein_coding		2.6994	3.0398	0.00236733	0.0722582
WBGene00006376	178938		syp-2		protein_coding	GO:0005515 (protein binding); GO:0005634 (nucleus); GO:0000003 (reproduction); GO:0045132 (meiotic chromosome segregation); GO:0000795 (synaptonemal complex); GO:0007130 (synaptonemal complex assembly); GO:0010845 (positive regulation of reciprocal meiotic recombination); GO:0000801 (central element)	-2.16596	-3.03923	0.00237187	0.0722644
WBGene00015332	176105		tyr-1	Putative tyrosinase-like protein tyr-1	protein_coding	GO:0046872 (metal ion binding); GO:0016491 (oxidoreductase activity); GO:0004497 (monooxygenase activity); GO:0005515 (protein binding)	1.83063	3.03898	0.00237379	0.0722644
WBGene00019068	176916	2166	faah-3	Fatty Acid Amide Hydrolase homolog	protein_coding	GO:0009062 (fatty acid catabolic process); GO:0004040 (amidase activity); GO:0017064 (fatty acid amide hydrolase activity)	-1.94468	-3.03613	0.00239638	0.0728564
WBGene00000903	175237	10220	daf-7	Dauer larva development regulatory growth factor daf-7	protein_coding	GO:0005615 (extracellular space); GO:0008083 (growth factor activity)	2.65025	3.03442	0.00241001	0.0731744
WBGene00018692	186111		F52E1.2		protein_coding	GO:0030246 (carbohydrate binding)	2.36296	3.03399	0.0024134	0.0731811
WBGene00001158	184065		ech-9	Enoyl-CoA Hydratase	protein_coding	GO:0003857 (3-hydroxyacyl-CoA dehydrogenase activity); GO:0005777 (peroxisome); GO:0006631 (fatty acid metabolic process); GO:0006635 (fatty acid beta-oxidation); GO:0016491 (oxidoreductase activity); GO:0016616 (oxidoreductase activity, acting on the CH-OH group of donors, NAD or NADP as acceptor); GO:0070403 (NAD+ binding); GO:0055114 (oxidation-reduction process)	5.92085	3.03264	0.00242428	0.0733187
WBGene00007517	182513	2880	gpx-3	Glutathione peroxidase 3	protein_coding	GO:0006979 (response to oxidative stress); GO:0004602 (glutathione peroxidase activity); GO:0055114 (oxidation-reduction process)	1.87833	3.03269	0.00242388	0.0733187
WBGene00001466	186548		flr-2		protein_coding	GO:0005576 (extracellular region); GO:0005615 (extracellular space); GO:0007166 (cell surface receptor signaling pathway); GO:0051427 (hormone receptor binding)	1.98	3.032	0.00242936	0.0733763
WBGene00008218	179810		nasp-2	NASP (Human Nuclear Autoantigenic Sperm Protein) homolog	protein_coding	GO:0005634 (nucleus); GO:0042393 (histone binding); GO:0005654 (nucleoplasm); GO:0006335 (DNA replication-dependent nucleosome assembly); GO:0034080 (CENP-A containing nucleosome assembly); GO:0005515 (protein binding)	-1.89996	-3.03036	0.00244261	0.0736801
WBGene00017712	173611		F22E5.17		protein_coding		-2.26438	-3.02779	0.00246352	0.0741387
WBGene00011342	187960		T01G5.7		protein_coding	GO:0046872 (metal ion binding)	-2.87514	-3.0277	0.00246423	0.0741387
WBGene00000693	177715		col-119	COLlagen	protein_coding	GO:0016020 (membrane); GO:0016021 (integral component of membrane); GO:0042302 (structural constituent of cuticle)	1.81953	3.02629	0.00247572	0.0741945
WBGene00016955	177348		perm-5	PERMeable eggshell	protein_coding	GO:0005576 (extracellular region); GO:0008289 (lipid binding)	-1.81994	-3.02658	0.00247337	0.0741945
WBGene00020674	180832		T22B7.7		protein_coding	GO:0005739 (mitochondrion); GO:0006637 (acyl-CoA metabolic process); GO:0047617 (acyl-CoA hydrolase activity)	1.85652	3.02643	0.00247464	0.0741945
WBGene00001793	174924	2997	gsy-1	Glycogen [starch] synthase	protein_coding	GO:0004373 (glycogen (starch) synthase activity); GO:0005978 (glycogen biosynthetic process)	-1.7301	-3.02364	0.00249756	0.074686
WBGene00017696	176209	51426	polk-1	DNA polymerase kappa	protein_coding	GO:0003887 (DNA-directed DNA polymerase activity); GO:0006281 (DNA repair); GO:0003684 (damaged DNA binding); GO:0003677 (DNA binding)	-1.91469	-3.02351	0.00249859	0.074686
WBGene00011020	178371		R05A10.3		protein_coding		2.4415	3.02309	0.00250204	0.0746927
WBGene00011836	179558		mam-4	MAM (Meprin, A5-protein, PTPmu) domain protein	protein_coding		2.10826	3.02232	0.00250841	0.0747863
WBGene00002242	183753		kvs-1		protein_coding	GO:0016020 (membrane); GO:0016021 (integral component of membrane); GO:0005216 (ion channel activity); GO:0006811 (ion transport); GO:0055085 (transmembrane transport); GO:0071805 (potassium ion transmembrane transport); GO:0005244 (voltage-gated ion channel activity); GO:0034765 (regulation of ion transmembrane transport); GO:0005249 (voltage-gated potassium channel activity); GO:0005267 (potass…	2.09802	3.01972	0.00253013	0.0753365
WBGene00004257	181288	7837	pxn-2	PeroXidasiN (Drosophila peroxidase) homolog	protein_coding	GO:0046872 (metal ion binding); GO:0016491 (oxidoreductase activity); GO:0005576 (extracellular region); GO:0005615 (extracellular space); GO:0020037 (heme binding); GO:0098869 (cellular oxidant detoxification); GO:0004601 (peroxidase activity); GO:0006979 (response to oxidative stress); GO:0005604 (basement membrane); GO:0010172 (embryonic body morphogenesis); GO:0007411 (axon guidance); GO:0071…	2.12948	3.01741	0.00254943	0.0758135
WBGene00020788	181144		nep-22	NEPrilysin metallopeptidase family	protein_coding	GO:0016020 (membrane); GO:0016021 (integral component of membrane); GO:0016787 (hydrolase activity); GO:0005886 (plasma membrane); GO:0046872 (metal ion binding); GO:0004222 (metalloendopeptidase activity); GO:0006508 (proteolysis); GO:0008233 (peptidase activity); GO:0008237 (metallopeptidase activity); GO:0016485 (protein processing); GO:0045121 (membrane raft)	2.143	3.01583	0.00256276	0.0760551
WBGene00013265	174866	114034	parn-2	PARN (Poly(A)-specific RiboNuclease) homolog	protein_coding	GO:0005737 (cytoplasm); GO:0003723 (RNA binding); GO:0003676 (nucleic acid binding); GO:0034472 (snRNA 3'-end processing); GO:0000175 (3'-5'-exoribonuclease activity); GO:0015030 (Cajal body); GO:0090503 (RNA phosphodiester bond hydrolysis, exonucleolytic); GO:0017069 (snRNA binding)	-2.10105	-3.01567	0.00256414	0.0760551
WBGene00020567	180675		adt-3	ADAMTS family	protein_coding	GO:0016787 (hydrolase activity); GO:0046872 (metal ion binding); GO:0004222 (metalloendopeptidase activity); GO:0006508 (proteolysis); GO:0008233 (peptidase activity); GO:0008237 (metallopeptidase activity)	2.30745	3.01347	0.00258282	0.076511
WBGene00001156	173300		ech-7	Enoyl-CoA Hydratase	protein_coding	GO:0003824 (catalytic activity); GO:0005739 (mitochondrion); GO:0006635 (fatty acid beta-oxidation); GO:0004300 (enoyl-CoA hydratase activity)	-1.78085	-3.0116	0.00259877	0.0768849
WBGene00013137	190193		Y53C10A.6		protein_coding		-1.9466	-3.00704	0.00263805	0.0779473
WBGene00007178	174420		B0457.2		protein_coding		2.16057	3.00623	0.00264509	0.0780555
WBGene00022649	174008		ZK84.1		protein_coding		1.95492	3.00366	0.00266751	0.0786166
WBGene00017294	180489		F09E10.1		protein_coding		2.36483	3.00147	0.00268683	0.0790852
WBGene00000692	177699		col-118	COLlagen	protein_coding	GO:0042302 (structural constituent of cuticle)	1.71917	2.998	0.00271755	0.0798195
WBGene00010239	3565238		F58B4.6		protein_coding		-1.84618	-2.99788	0.00271869	0.0798195
WBGene00011310	3565727		T01B4.3		protein_coding		1.82173	2.99695	0.00272692	0.0799597
WBGene00007087	178164		B0001.2		protein_coding		-1.91888	-2.99534	0.00274136	0.0800783
WBGene00015393	179123		C03G6.5	UPF0376 protein C03G6.5	protein_coding	GO:0005576 (extracellular region)	-2.68019	-2.99594	0.00273602	0.0800783
WBGene00016294	183101		C31H2.4		protein_coding	GO:0046872 (metal ion binding); GO:0005789 (endoplasmic reticulum membrane); GO:0000139 (Golgi membrane); GO:0009072 (aromatic amino acid family metabolic process); GO:0003868 (4-hydroxyphenylpyruvate dioxygenase activity); GO:0006572 (tyrosine catabolic process); GO:0016701 (oxidoreductase activity, acting on single donors with incorporation of molecular oxygen); GO:0055114 (oxidation-reduction …	2.30848	2.99537	0.00274111	0.0800783
WBGene00009731	176765		exo-1	EXOnuclease	protein_coding	GO:0005634 (nucleus); GO:0003824 (catalytic activity); GO:0016787 (hydrolase activity); GO:0003677 (DNA binding); GO:0046872 (metal ion binding); GO:0006281 (DNA repair); GO:0090305 (nucleic acid phosphodiester bond hydrolysis); GO:0006974 (cellular response to DNA damage stimulus); GO:0004518 (nuclease activity); GO:0004527 (exonuclease activity); GO:0004519 (endonuclease activity); GO:0006298 (…	-1.9768	-2.99312	0.00276138	0.0804668
WBGene00013896	179756		ZC443.1		protein_coding	GO:0005829 (cytosol); GO:0016491 (oxidoreductase activity); GO:0004032 (alditol:NADP+ 1-oxidoreductase activity); GO:0055114 (oxidation-reduction process); GO:0047834 (D-threo-aldose 1-dehydrogenase activity)	2.00825	2.9931	0.00276163	0.0804668
WBGene00008462	183995		E02H4.4		protein_coding	GO:0005576 (extracellular region)	-1.99213	-2.98979	0.00279169	0.081138
WBGene00017467	178901		F14F9.4		protein_coding		-1.92339	-2.99014	0.00278851	0.081138
WBGene00021465	189772		ekl-7		protein_coding		-2.36863	-2.9894	0.0027953	0.0811409
WBGene00012095	176776	9791	pssy-2	PhosphatidylSerine SYnthase	protein_coding	GO:0016020 (membrane); GO:0016021 (integral component of membrane); GO:0016740 (transferase activity); GO:0006629 (lipid metabolic process); GO:0005783 (endoplasmic reticulum); GO:0005789 (endoplasmic reticulum membrane); GO:0006659 (phosphatidylserine biosynthetic process); GO:0106245 (L-serine-phosphatidylethanolamine phosphatidyltransferase activity)	-2.02179	-2.98897	0.00279924	0.0811533
WBGene00008219	179811		C50B6.3		protein_coding		-1.83798	-2.98713	0.0028161	0.0814378
WBGene00018117	185393		nlp-47	Neuropeptide-Like Protein	protein_coding	GO:0007218 (neuropeptide signaling pathway)	1.7417	2.98718	0.00281564	0.0814378
WBGene00006592	176014		dpy-31	Zinc metalloproteinase dpy-31	protein_coding	GO:0018996 (molting cycle, collagen and cuticulin-based cuticle); GO:0004222 (metalloendopeptidase activity); GO:0008237 (metallopeptidase activity); GO:0006508 (proteolysis); GO:0008270 (zinc ion binding)	1.93461	2.98485	0.00283714	0.0819437
WBGene00018640	180855		F49E10.2		protein_coding	GO:0046872 (metal ion binding); GO:0003834 (beta-carotene 15,15'-monooxygenase activity); GO:0010436 (carotenoid dioxygenase activity); GO:0016121 (carotene catabolic process); GO:0016702 (oxidoreductase activity, acting on single donors with incorporation of molecular oxygen, incorporation of two atoms of oxygen); GO:0042574 (retinal metabolic process); GO:0055114 (oxidation-reduction process)	3.92326	2.98407	0.0028444	0.082051
WBGene00020813	181760		T25G12.6		protein_coding	GO:0016020 (membrane); GO:0016021 (integral component of membrane)	-2.30684	-2.98302	0.00285415	0.0822294
WBGene00008554	184138		F07C6.3		protein_coding		2.09324	2.97973	0.00288502	0.083
WBGene00001476	177954	2330	fmo-1	Dimethylaniline monooxygenase [N-oxide-forming]	protein_coding	GO:0016020 (membrane); GO:0016021 (integral component of membrane); GO:0016491 (oxidoreductase activity); GO:0050660 (flavin adenine dinucleotide binding); GO:0004497 (monooxygenase activity); GO:0004499 (N,N-dimethylaniline monooxygenase activity); GO:0050661 (NADP binding); GO:0005783 (endoplasmic reticulum); GO:0005789 (endoplasmic reticulum membrane); GO:0043231 (intracellular membrane-bounde…	-1.7954	-2.97941	0.00288808	0.083
WBGene00008464	183997		E02H4.6		protein_coding	GO:0005634 (nucleus); GO:0005524 (ATP binding); GO:0005737 (cytoplasm); GO:0004672 (protein kinase activity); GO:0004674 (protein serine/threonine kinase activity); GO:0006468 (protein phosphorylation); GO:0016301 (kinase activity); GO:0016310 (phosphorylation); GO:0018105 (peptidyl-serine phosphorylation); GO:0032436 (positive regulation of proteasomal ubiquitin-dependent protein catabolic proce…	-2.29547	-2.97838	0.00289775	0.0831745
WBGene00012835	180291		ani-3	Anillin-like protein 3	protein_coding		-1.9414	-2.97607	0.00291969	0.0836692
WBGene00001854	181073		hil-3	Histone H1.3	protein_coding	GO:0006334 (nucleosome assembly); GO:0000786 (nucleosome); GO:0003677 (DNA binding)	1.7284	2.97542	0.00292585	0.0836692
WBGene00021043	175171	5106	pck-1	Phosphoenolypyruvate CarboxyKinase	protein_coding	GO:0005525 (GTP binding); GO:0016301 (kinase activity); GO:0016310 (phosphorylation); GO:0046872 (metal ion binding); GO:0000166 (nucleotide binding); GO:0005829 (cytosol); GO:0016829 (lyase activity); GO:0030145 (manganese ion binding); GO:0006094 (gluconeogenesis); GO:0033993 (response to lipid); GO:0016831 (carboxy-lyase activity); GO:0042594 (response to starvation); GO:0004611 (phosphoenolpy…	-1.85664	-2.97555	0.00292468	0.0836692
WBGene00020761	188846	5557	T24C4.5	DNA primase	protein_coding	GO:0046872 (metal ion binding); GO:0016740 (transferase activity); GO:0016779 (nucleotidyltransferase activity); GO:0006260 (DNA replication); GO:0003899 (DNA-directed 5'-3' RNA polymerase activity); GO:0005658 (alpha DNA polymerase:primase complex); GO:0003896 (DNA primase activity); GO:0006269 (DNA replication, synthesis of RNA primer)	-2.10077	-2.9745	0.00293468	0.0838179
WBGene00010194	186443		btb-19	BTB (Broad/complex/Tramtrack/Bric a brac) domain protein	protein_coding	GO:0005515 (protein binding)	-2.25761	-2.97398	0.00293963	0.0838556
WBGene00010081	186278		F55A11.8		protein_coding		-2.2167	-2.9732	0.00294708	0.0838619
WBGene00004398	174226		rol-8	Cuticle collagen 6	protein_coding	GO:0042302 (structural constituent of cuticle)	6.25683	2.9732	0.00294711	0.0838619
WBGene00013405	173276	51567	tdpt-1	5'-tyrosyl-DNA phosphodiesterase	protein_coding	GO:0005737 (cytoplasm); GO:0016787 (hydrolase activity); GO:0005634 (nucleus); GO:0046872 (metal ion binding); GO:0090305 (nucleic acid phosphodiester bond hydrolysis); GO:0006302 (double-strand break repair); GO:0006281 (DNA repair); GO:0006974 (cellular response to DNA damage stimulus); GO:0004518 (nuclease activity); GO:0042802 (identical protein binding); GO:0003697 (single-stranded DNA bindi…	-2.02834	-2.96964	0.00298153	0.084737
WBGene00016919	183789		C54E4.4		protein_coding	GO:0016020 (membrane); GO:0016021 (integral component of membrane)	2.28951	2.96922	0.00298559	0.0847481
WBGene00011974	188837		xbx-5	X-BoX promoter element regulated	protein_coding	GO:0016020 (membrane); GO:0016021 (integral component of membrane)	2.24219	2.96825	0.00299501	0.0849113
WBGene00021893	177083		ndnf-1	NDNF (Neuron Derived Neurotrophic Factor) homolog	protein_coding		-1.92388	-2.96612	0.00301584	0.0853136
WBGene00011330	179863		T01D3.6		protein_coding	GO:0005509 (calcium ion binding); GO:0005576 (extracellular region); GO:0005615 (extracellular space); GO:0010951 (negative regulation of endopeptidase activity); GO:0010466 (negative regulation of peptidase activity); GO:0030414 (peptidase inhibitor activity); GO:0031012 (extracellular matrix); GO:0004867 (serine-type endopeptidase inhibitor activity)	-1.94777	-2.96604	0.00301658	0.0853136
WBGene00003835	179938	10482	nxf-2	Nuclear RNA export factor 2	protein_coding	GO:0005515 (protein binding)	-2.09776	-2.96212	0.00305524	0.0861958
WBGene00004119	179291		pqn-31	Prion-like-(Q/N-rich)-domain-bearing protein	protein_coding		1.77083	2.96221	0.00305436	0.0861958
WBGene00012148	174792	51477	inos-1	INOsitol-3-phosphate Synthase	protein_coding	GO:0005737 (cytoplasm); GO:0016853 (isomerase activity); GO:0008654 (phospholipid biosynthetic process); GO:0004512 (inositol-3-phosphate synthase activity); GO:0006021 (inositol biosynthetic process)	-1.87299	-2.96101	0.00306629	0.086402
WBGene00004346	174020		rgs-3	Regulator of G-protein signaling rgs-3	protein_coding	GO:0007635 (chemosensory behavior); GO:0050913 (sensory perception of bitter taste); GO:0009968 (negative regulation of signal transduction)	2.2318	2.96036	0.0030728	0.08648
WBGene00010053	174766		F54D5.9		protein_coding	GO:0005515 (protein binding)	-1.88551	-2.95982	0.0030782	0.0865266
WBGene00017637	184726		F20D6.8		protein_coding	GO:0005525 (GTP binding); GO:0005886 (plasma membrane); GO:0003924 (GTPase activity); GO:0005246 (calcium channel regulator activity)	1.8476	2.95865	0.0030899	0.08675
WBGene00002109	173268		ins-26	INSulin related	protein_coding	GO:0005576 (extracellular region); GO:0005179 (hormone activity); GO:0007165 (signal transduction)	3.70528	2.9577	0.00309944	0.0869122
WBGene00016632	259441	161823	C44B7.12	Adenosine deaminase-like protein	protein_coding	GO:0016787 (hydrolase activity); GO:0046872 (metal ion binding); GO:0019239 (deaminase activity); GO:0004000 (adenosine deaminase activity); GO:0006154 (adenosine catabolic process); GO:0046103 (inosine biosynthetic process); GO:0009117 (nucleotide metabolic process); GO:0062154 (N6-mAMP deaminase activity)	-1.86261	-2.95438	0.00313301	0.0877469
WBGene00003499	187005		mut-2	MUTator	protein_coding	GO:0016779 (nucleotidyltransferase activity); GO:0031123 (RNA 3'-end processing); GO:0009792 (embryo development ending in birth or egg hatching); GO:0000003 (reproduction); GO:0048471 (perinuclear region of cytoplasm); GO:0045132 (meiotic chromosome segregation); GO:0016246 (RNA interference); GO:0000335 (negative regulation of transposition, DNA-mediated); GO:0050265 (RNA uridylyltransferase ac…	-1.97558	-2.95162	0.00316111	0.0884268
WBGene00002087	191685		ins-4	Probable insulin-like peptide beta-type 1	protein_coding	GO:0005179 (hormone activity); GO:0005576 (extracellular region)	2.17625	2.94934	0.00318453	0.0889742
WBGene00007934	181426		C34E7.4		protein_coding		1.85306	2.94667	0.00321218	0.0896386
WBGene00000250	179841		bir-2	Baculoviral IAP repeat-containing protein bir-2	protein_coding		-2.0636	-2.94609	0.00321824	0.0896991
WBGene00003029	171994		lin-44	Abnormal cell lineage protein 44	protein_coding	GO:0016055 (Wnt signaling pathway); GO:0005102 (signaling receptor binding); GO:0007275 (multicellular organism development); GO:0005576 (extracellular region)	1.86827	2.94538	0.00322556	0.0897949
WBGene00017838	184993		F26G1.2		protein_coding		1.78747	2.94069	0.00327486	0.0910578
WBGene00009272	172549		gras-1	GRASP (General Receptor for phosphoinositides 1-Associated Scaffold Protein) homolog	protein_coding	GO:0005515 (protein binding)	-1.84846	-2.93925	0.00329012	0.0913719
WBGene00020168	187995	387700	mct-5	MonoCarboxylate Transporter family	protein_coding	GO:0016020 (membrane); GO:0016021 (integral component of membrane); GO:0022857 (transmembrane transporter activity); GO:0055085 (transmembrane transport); GO:0008028 (monocarboxylic acid transmembrane transporter activity); GO:0015718 (monocarboxylic acid transport)	-1.93014	-2.93835	0.00329963	0.0915081
WBGene00012715	176734		snpc-1.2	SNAPc (Small Nuclear RNA Activating Complex) homolog	protein_coding	GO:0043565 (sequence-specific DNA binding); GO:0019185 (snRNA-activating protein complex); GO:0042795 (snRNA transcription by RNA polymerase II); GO:0042796 (snRNA transcription by RNA polymerase III)	-1.89501	-2.93804	0.00330294	0.0915081
WBGene00011601	188246		zim-3	Zinc finger In Meiosis	protein_coding	GO:0000794 (condensed nuclear chromosome); GO:0045132 (meiotic chromosome segregation)	-2.15085	-2.93743	0.00330943	0.0915781
WBGene00002072	179555		ima-1	Importin subunit alpha-1	protein_coding	GO:0006606 (protein import into nucleus); GO:0061608 (nuclear import signal receptor activity)	-1.77355	-2.93568	0.00332822	0.0919879
WBGene00017429	184416		F13D11.4		protein_coding	GO:0016491 (oxidoreductase activity); GO:0016616 (oxidoreductase activity, acting on the CH-OH group of donors, NAD or NADP as acceptor); GO:0003854 (3-beta-hydroxy-delta5-steroid dehydrogenase activity); GO:0006694 (steroid biosynthetic process); GO:0055114 (oxidation-reduction process)	1.8046	2.93375	0.00334895	0.0924502
WBGene00009397	174929		clec-66	C-type LECtin	protein_coding	GO:0030246 (carbohydrate binding); GO:0045087 (innate immune response)	-2.8843	-2.9333	0.00335379	0.0924735
WBGene00018808	173728		F54D10.7		protein_coding	GO:0005515 (protein binding); GO:0042802 (identical protein binding)	-2.16936	-2.93191	0.00336886	0.0927781
WBGene00010185	180058		F57A10.4		protein_coding	GO:0016020 (membrane); GO:0016021 (integral component of membrane)	-3.51097	-2.92836	0.00340755	0.0937319
WBGene00014117	172736		clec-91	C-type lectin domain-containing protein 91	protein_coding		-1.8492	-2.92739	0.00341818	0.0939125
WBGene00015597			fbxa-162		pseudogene		-4.03748	-2.92701	0.00342242	0.0939173
WBGene00015790	182633		C15C7.4		protein_coding		2.05505	2.92639	0.00342917	0.093991
WBGene00010042	174372	617	bcs-1	BCS1 (Mitochondrial chaperone) homolog	protein_coding	GO:0016020 (membrane); GO:0005524 (ATP binding); GO:0005743 (mitochondrial inner membrane); GO:0000166 (nucleotide binding); GO:0016887 (ATPase activity); GO:0032979 (protein insertion into mitochondrial inner membrane from matrix); GO:0034551 (mitochondrial respiratory chain complex III assembly)	-1.96926	-2.92542	0.00343987	0.0941725
WBGene00001604	178452		gln-3	Glutamine synthetase	protein_coding	GO:0005737 (cytoplasm); GO:0003824 (catalytic activity); GO:0000166 (nucleotide binding); GO:0016874 (ligase activity); GO:0005524 (ATP binding); GO:0006807 (nitrogen compound metabolic process); GO:0004356 (glutamate-ammonia ligase activity); GO:0006542 (glutamine biosynthetic process)	-1.70481	-2.92424	0.00345303	0.0941981
WBGene00011072	174660		tag-209		protein_coding		1.82638	2.92473	0.0034475	0.0941981
WBGene00013321	178396		Y57G11C.31		protein_coding	GO:0016020 (membrane); GO:0016021 (integral component of membrane)	1.80356	2.92441	0.0034511	0.0941981
WBGene00000667	176528		col-92	COLlagen	protein_coding	GO:0016020 (membrane); GO:0016021 (integral component of membrane); GO:0042302 (structural constituent of cuticle)	2.13576	2.92275	0.0034696	0.0945384
WBGene00006787	175126	3339	unc-52	Basement membrane proteoglycan	protein_coding	GO:0005509 (calcium ion binding); GO:0005737 (cytoplasm); GO:0005576 (extracellular region); GO:0009888 (tissue development); GO:0002119 (nematode larval development); GO:0005604 (basement membrane); GO:0040017 (positive regulation of locomotion); GO:0060465 (pharynx development); GO:1905905 (pharyngeal gland morphogenesis); GO:0031430 (M band); GO:0060298 (positive regulation of sarcomere organi…	1.82374	2.91898	0.00351177	0.0955746
WBGene00008089	3565088		C44C10.9		protein_coding	GO:0016020 (membrane); GO:0016021 (integral component of membrane)	1.82914	2.91583	0.00354744	0.0962054
WBGene00012466	189456		ippk-1	Inositol-pentakisphosphate 2-kinase	protein_coding	GO:0005634 (nucleus); GO:0005524 (ATP binding); GO:0016301 (kinase activity); GO:0016310 (phosphorylation); GO:0000166 (nucleotide binding); GO:0016740 (transferase activity); GO:0032958 (inositol phosphate biosynthetic process); GO:0035299 (inositol pentakisphosphate 2-kinase activity); GO:0052746 (inositol phosphorylation)	-1.68308	-2.91595	0.00354602	0.0962054
WBGene00013432	190496		Y66D12A.6		protein_coding		-2.90729	-2.91596	0.00354593	0.0962054
WBGene00044294	3565843		C01B10.11		protein_coding		1.81641	2.91272	0.00358298	0.0970554
WBGene00007765	3565797		C27B7.9		protein_coding		1.95727	2.91208	0.00359035	0.0971413
WBGene00019355	186919		K03B4.4		protein_coding		2.17629	2.91136	0.00359854	0.0972489
WBGene00013079	180211		ttr-26	TransThyretin-Related family domain	protein_coding	GO:0005576 (extracellular region); GO:0009986 (cell surface)	1.75972	2.91051	0.00360844	0.0974026
WBGene00010502	174300		K02C4.3	Probable ubiquitin carboxyl-terminal hydrolase K02C4.3	protein_coding	GO:0005634 (nucleus); GO:0016787 (hydrolase activity); GO:0006511 (ubiquitin-dependent protein catabolic process); GO:0006508 (proteolysis); GO:0008233 (peptidase activity); GO:0005829 (cytosol); GO:0004197 (cysteine-type endopeptidase activity); GO:0016579 (protein deubiquitination); GO:0008234 (cysteine-type peptidase activity); GO:0004843 (thiol-dependent ubiquitin-specific protease activity);…	-1.7496	-2.90971	0.00361768	0.097538
WBGene00007607	182636		C15C8.5		protein_coding	GO:0016020 (membrane); GO:0016021 (integral component of membrane)	3.24349	2.90832	0.00363372	0.0978564
WBGene00022782	191367		ZK622.4		protein_coding	GO:0046872 (metal ion binding)	2.06684	2.90469	0.00367621	0.0988853
WBGene00012018	259727		T25C12.3		protein_coding		1.70795	2.90202	0.00370764	0.099541
WBGene00006394	172451		taf-11.2	TAF (TBP-associated transcription factor) family	protein_coding	GO:0005634 (nucleus); GO:0046982 (protein heterodimerization activity); GO:0005669 (transcription factor TFIID complex); GO:0006367 (transcription initiation from RNA polymerase II promoter); GO:0051123 (RNA polymerase II preinitiation complex assembly); GO:0008134 (transcription factor binding); GO:0003713 (transcription coactivator activity); GO:0045893 (positive regulation of transcription, DN…	-1.89904	-2.90189	0.0037092	0.099541
WBGene00008783	173102		F14B6.2		protein_coding	GO:0016020 (membrane); GO:0016021 (integral component of membrane); GO:0005886 (plasma membrane)	1.99641	2.90123	0.00371699	0.0995559
WBGene00009375	175486		F34D10.6		protein_coding	GO:0005515 (protein binding)	2.11473	2.90112	0.00371837	0.0995559
WBGene00001692	177109		grd-3	GRounDhog (Hedgehog-like family)	protein_coding	GO:0005102 (signaling receptor binding); GO:0007267 (cell-cell signaling); GO:0050829 (defense response to Gram-negative bacterium); GO:0005576 (extracellular region)	2.12667	2.90042	0.00372668	0.0996629
WBGene00011010	181451		R04D3.2		protein_coding		-1.94219	-2.89791	0.00375658	0.100346
WBGene00012168	189076	1358	W01A8.6		protein_coding	GO:0008270 (zinc ion binding); GO:0006508 (proteolysis); GO:0005615 (extracellular space); GO:0004181 (metallocarboxypeptidase activity)	2.37286	2.89724	0.00376465	0.100446
WBGene00019799	173707		M151.7		protein_coding		-2.22658	-2.8951	0.00379036	0.101015
WBGene00004985	191771		spo-11	Meiotic recombination protein spo-11	protein_coding	GO:0005524 (ATP binding); GO:0003824 (catalytic activity); GO:0016787 (hydrolase activity); GO:0003677 (DNA binding); GO:0005634 (nucleus); GO:0046872 (metal ion binding); GO:0005694 (chromosome); GO:0006259 (DNA metabolic process); GO:0000228 (nuclear chromosome); GO:0051321 (meiotic cell cycle); GO:0007131 (reciprocal meiotic recombination); GO:0000706 (meiotic DNA double-strand break processin…	-2.05974	-2.8944	0.00379879	0.101123
WBGene00022474	191030		zig-9	2 (Zwei) IG domain protein	protein_coding		-1.88701	-2.89357	0.00380891	0.101276
WBGene00194851			K07C10.3		ncRNA		2.4814	2.89177	0.00383073	0.101398
WBGene00009946	174566		ogr-2	Oocyte and Germ-line Related	protein_coding		-1.91868	-2.89233	0.00382391	0.101398
WBGene00005655	187292		srr-4	Serpentine Receptor, class R	protein_coding	GO:0016020 (membrane); GO:0016021 (integral component of membrane); GO:0008340 (determination of adult lifespan)	1.93378	2.89175	0.00383107	0.101398
WBGene00013849	176299		ZC84.6		protein_coding	GO:0004867 (serine-type endopeptidase inhibitor activity); GO:0010951 (negative regulation of endopeptidase activity)	2.95088	2.89233	0.00382401	0.101398
WBGene00003563	180448	23413	ncs-1	Neuronal calcium sensor 1	protein_coding	GO:0005509 (calcium ion binding)	2.21002	2.88974	0.00385563	0.101932
WBGene00000871	172399		cye-1	G1/S-specific cyclin-E	protein_coding		-1.81162	-2.88778	0.00387969	0.10245
WBGene00001600	172245		glh-3	ATP-dependent RNA helicase glh-3	protein_coding	GO:0004386 (helicase activity); GO:0003676 (nucleic acid binding); GO:0005524 (ATP binding); GO:0008270 (zinc ion binding)	-1.93211	-2.88741	0.00388422	0.102453
WBGene00001464	182944		flp-21	FMRF-Like Peptide	protein_coding	GO:0007631 (feeding behavior); GO:0007218 (neuropeptide signaling pathway); GO:0005615 (extracellular space); GO:0031841 (neuropeptide Y receptor binding); GO:1904068 (G protein-coupled receptor signaling pathway involved in social behavior)	1.88329	2.88512	0.00391263	0.103085
WBGene00004094	172152		ppw-2	Piwi-like protein	protein_coding	GO:0003676 (nucleic acid binding); GO:0005515 (protein binding)	-2.03401	-2.88342	0.00393383	0.103525
WBGene00000144	179454		apc-10	Anaphase-promoting complex subunit 10	protein_coding	GO:0005680 (anaphase-promoting complex); GO:0031145 (anaphase-promoting complex-dependent catabolic process)	-2.36527	-2.88069	0.00396804	0.104307
WBGene00020143	181725		T01C8.2		protein_coding	GO:0016020 (membrane); GO:0016021 (integral component of membrane)	1.83427	2.87709	0.00401362	0.105385
WBGene00009241	185099		F28H7.8	CRAL-TRIO domain-containing protein F28H7.8	protein_coding		2.01518	2.87619	0.00402503	0.105565
WBGene00020375	172305	55650	pigv-1	GPI mannosyltransferase pigv-1	protein_coding	GO:0004376 (glycolipid mannosyltransferase activity); GO:0000009 (alpha-1,6-mannosyltransferase activity); GO:0006506 (GPI anchor biosynthetic process)	-1.79863	-2.87581	0.0040299	0.105572
WBGene00007167	175629		rbg-3	RaB GAP related	protein_coding	GO:0005096 (GTPase activator activity); GO:0006886 (intracellular protein transport); GO:0090630 (activation of GTPase activity); GO:0005737 (cytoplasm)	-1.73831	-2.87459	0.00404554	0.105742
WBGene00021877	190278		Y54G2A.12		protein_coding	GO:0071013 (catalytic step 2 spliceosome); GO:0000398 (mRNA splicing, via spliceosome); GO:0005515 (protein binding)	-2.28432	-2.87477	0.00404327	0.105742
WBGene00017754	184907		F23F12.8		protein_coding	GO:0005634 (nucleus); GO:0004843 (thiol-dependent ubiquitin-specific protease activity); GO:0043130 (ubiquitin binding); GO:0019784 (NEDD8-specific protease activity); GO:0071108 (protein K48-linked deubiquitination)	3.56813	2.87164	0.0040835	0.106614
WBGene00000885	175471		cyn-9	Peptidyl-prolyl cis-trans isomerase 9	protein_coding	GO:0000413 (protein peptidyl-prolyl isomerization); GO:0006457 (protein folding); GO:0003755 (peptidyl-prolyl cis-trans isomerase activity)	-2.05454	-2.87014	0.00410288	0.106999
WBGene00001373	186801		exp-1	Gamma-aminobutyric acid receptor exp-1	protein_coding	GO:0005230 (extracellular ligand-gated ion channel activity); GO:0034220 (ion transmembrane transport); GO:0006811 (ion transport); GO:0005216 (ion channel activity); GO:0004888 (transmembrane signaling receptor activity); GO:0016021 (integral component of membrane)	2.10012	2.86848	0.00412445	0.10744
WBGene00007938	181306		C34F6.1		protein_coding	GO:0004867 (serine-type endopeptidase inhibitor activity); GO:0010951 (negative regulation of endopeptidase activity)	4.72168	2.86651	0.0041502	0.107972
WBGene00010678	177881		K08F4.3	Translocon-associated protein subunit beta	protein_coding	GO:0016020 (membrane); GO:0016021 (integral component of membrane); GO:0005783 (endoplasmic reticulum); GO:0005789 (endoplasmic reticulum membrane)	-1.89122	-2.86621	0.00415422	0.107972
WBGene00007118	179607		npp-22	Nucleoporin ndc-1	protein_coding		-1.76388	-2.86543	0.0041644	0.107994
WBGene00013100	178459		zip-7	BZIP transcription factor family	protein_coding	GO:0005634 (nucleus); GO:0003700 (DNA-binding transcription factor activity); GO:0006355 (regulation of transcription, DNA-templated); GO:0003677 (DNA binding); GO:0005515 (protein binding); GO:0006357 (regulation of transcription by RNA polymerase II); GO:0000978 (RNA polymerase II cis-regulatory region sequence-specific DNA binding); GO:0000981 (DNA-binding transcription factor activity, RNA po…	2.39153	2.86551	0.00416339	0.107994
WBGene00019521	179012		dmd-7	DM (Doublesex/MAB-3) Domain family	protein_coding	GO:0005634 (nucleus); GO:0046872 (metal ion binding); GO:0006355 (regulation of transcription, DNA-templated); GO:0043565 (sequence-specific DNA binding); GO:0003677 (DNA binding); GO:0000978 (RNA polymerase II cis-regulatory region sequence-specific DNA binding); GO:0000981 (DNA-binding transcription factor activity, RNA polymerase II-specific); GO:0006357 (regulation of transcription by RNA pol…	1.69808	2.86383	0.00418559	0.108422
WBGene00012220	174833		W03C9.2		protein_coding	GO:0005737 (cytoplasm); GO:0055120 (striated muscle dense body)	-1.90104	-2.86243	0.0042041	0.108595
WBGene00012859	176475		Y45F3A.1		protein_coding		2.26967	2.86269	0.00420058	0.108595
WBGene00013499	190573	28231	Y70G10A.3	Solute carrier organic anion transporter family member	protein_coding	GO:0016020 (membrane); GO:0016021 (integral component of membrane); GO:0005886 (plasma membrane); GO:0006811 (ion transport); GO:0022857 (transmembrane transporter activity); GO:0055085 (transmembrane transport); GO:0005887 (integral component of plasma membrane); GO:0015347 (sodium-independent organic anion transmembrane transporter activity); GO:0043252 (sodium-independent organic anion transpo…	1.83976	2.86226	0.00420638	0.108595
WBGene00003798	172348	23225	npp-12	Nuclear Pore complex Protein	protein_coding	GO:0016020 (membrane); GO:0016021 (integral component of membrane); GO:0005643 (nuclear pore)	-1.70939	-2.86177	0.00421288	0.108641
WBGene00017336	184295		ugt-41	UDP-GlucuronosylTransferase	protein_coding	GO:0016020 (membrane); GO:0016021 (integral component of membrane); GO:0016740 (transferase activity); GO:0043231 (intracellular membrane-bounded organelle); GO:0015020 (glucuronosyltransferase activity); GO:0016757 (transferase activity, transferring glycosyl groups); GO:0008194 (UDP-glycosyltransferase activity)	2.57348	2.86056	0.00422893	0.108835
WBGene00021852	175369		Y54F10AM.8	Putative phospholipase B-like 3	protein_coding	GO:0016787 (hydrolase activity); GO:0005576 (extracellular region); GO:0006629 (lipid metabolic process); GO:0016042 (lipid catabolic process); GO:0004620 (phospholipase activity); GO:0009395 (phospholipid catabolic process)	-1.85653	-2.86049	0.0042298	0.108835
WBGene00016059	178936	5156	hir-1	Hypoxia Inhibited Receptor tyrosine kinase	protein_coding	GO:0016020 (membrane); GO:0016021 (integral component of membrane); GO:0005524 (ATP binding); GO:0004672 (protein kinase activity); GO:0006468 (protein phosphorylation); GO:0016301 (kinase activity); GO:0016310 (phosphorylation); GO:0004713 (protein tyrosine kinase activity); GO:0018108 (peptidyl-tyrosine phosphorylation); GO:0005887 (integral component of plasma membrane); GO:0004714 (transmembr…	1.74448	2.86001	0.00423625	0.10888
WBGene00008874	184555		F15H10.7		protein_coding	GO:0016020 (membrane); GO:0016021 (integral component of membrane); GO:0003824 (catalytic activity); GO:0032504 (multicellular organism reproduction)	4.58378	2.85757	0.00426894	0.109598
WBGene00019606	174056		clec-88	C-type lectin domain-containing protein 88	protein_coding	GO:0030246 (carbohydrate binding)	-1.87949	-2.85598	0.00429036	0.109641
WBGene00020696	178777	5837	pygl-1	Alpha-1,4 glucan phosphorylase	protein_coding	GO:0005737 (cytoplasm); GO:0016740 (transferase activity); GO:0016757 (transferase activity, transferring glycosyl groups); GO:0005975 (carbohydrate metabolic process); GO:0030170 (pyridoxal phosphate binding); GO:0004645 (1,4-alpha-oligoglucan phosphorylase activity); GO:0005980 (glycogen catabolic process); GO:0008184 (glycogen phosphorylase activity); GO:0102250 (linear malto-oligosaccharide p…	-1.66304	-2.85615	0.00428815	0.109641
WBGene00017681	184790		slc-17.5	SLC (SoLute Carrier) homolog	protein_coding	GO:0016020 (membrane); GO:0016021 (integral component of membrane); GO:0022857 (transmembrane transporter activity); GO:0055085 (transmembrane transport)	1.9905	2.8563	0.00428613	0.109641
WBGene00013292	190363		Y57G11A.4		protein_coding		2.21645	2.85701	0.00427648	0.109641
WBGene00021977	178896		Y58A7A.3		protein_coding		-1.77146	-2.85569	0.00429436	0.109641
WBGene00044696	4363098		F52E1.14		protein_coding		-1.75122	-2.85119	0.00435562	0.111075
WBGene00016782	178809		phat-3	PHAryngeal gland Toxin-related	protein_coding	GO:1905905 (pharyngeal gland morphogenesis)	3.30288	2.85051	0.00436494	0.111075
WBGene00013855	179729	8029	ZC116.3	Probable cubilin	protein_coding	GO:0005509 (calcium ion binding); GO:0015031 (protein transport); GO:0005576 (extracellular region); GO:0006629 (lipid metabolic process)	-2.00803	-2.8508	0.00436088	0.111075
WBGene00007278	182160		lab-1	Long Arms of the Bivalent protein	protein_coding	GO:0005634 (nucleus); GO:0005515 (protein binding); GO:0005694 (chromosome); GO:0000793 (condensed chromosome); GO:1900182 (positive regulation of protein localization to nucleus); GO:0008157 (protein phosphatase 1 binding); GO:0034089 (establishment of meiotic sister chromatid cohesion); GO:0034090 (maintenance of meiotic sister chromatid cohesion); GO:1900181 (negative regulation of protein loc…	-2.18696	-2.84939	0.00438036	0.111345
WBGene00020087			R119.1		pseudogene		-2.5776	-2.84903	0.00438523	0.111346
WBGene00000478	178768	8325	cfz-2	Frizzled-2	protein_coding	GO:0004888 (transmembrane signaling receptor activity); GO:0007166 (cell surface receptor signaling pathway); GO:0016021 (integral component of membrane); GO:0016020 (membrane); GO:0005515 (protein binding)	1.90957	2.84605	0.00442647	0.11216
WBGene00021661	171624	83746	mbtr-1	Malignant brain tumor repeat protein 1	protein_coding	GO:0005634 (nucleus); GO:0006355 (regulation of transcription, DNA-templated)	-1.98283	-2.8458	0.00443002	0.11216
WBGene00005396	191253		srh-181	Serpentine Receptor, class H	protein_coding	GO:0016020 (membrane); GO:0016021 (integral component of membrane)	-4.88121	-2.84567	0.00443183	0.11216
WBGene00010999	187546		R03G8.4	Aminopeptidase	protein_coding	GO:0008237 (metallopeptidase activity); GO:0006508 (proteolysis); GO:0008270 (zinc ion binding)	3.51414	2.84284	0.0044714	0.112547
WBGene00006311	179802		sun-1	Sun domain-containing protein 1	protein_coding	GO:0016020 (membrane); GO:0016021 (integral component of membrane); GO:0005634 (nucleus); GO:0005515 (protein binding); GO:0031965 (nuclear membrane); GO:0005635 (nuclear envelope); GO:0006998 (nuclear envelope organization); GO:0043495 (protein-membrane adaptor activity); GO:0009792 (embryo development ending in birth or egg hatching); GO:0008104 (protein localization); GO:0010824 (regulation of…	-1.7919	-2.84283	0.0044715	0.112547
WBGene00019232	186766		ugt-13	UDP-GlucuronosylTransferase	protein_coding	GO:0016020 (membrane); GO:0016021 (integral component of membrane); GO:0016740 (transferase activity); GO:0043231 (intracellular membrane-bounded organelle); GO:0015020 (glucuronosyltransferase activity); GO:0016757 (transferase activity, transferring glycosyl groups); GO:0008194 (UDP-glycosyltransferase activity)	2.90411	2.84291	0.00447044	0.112547
WBGene00013899	191170		ZC443.4		protein_coding	GO:0003723 (RNA binding); GO:0003743 (translation initiation factor activity); GO:0005852 (eukaryotic translation initiation factor 3 complex); GO:0006413 (translational initiation); GO:0031369 (translation initiation factor binding)	1.71051	2.84375	0.00445862	0.112547
WBGene00013902	179751		ZC455.1		protein_coding		1.97035	2.84403	0.00445473	0.112547
WBGene00015747	176208		C13G5.2		protein_coding		-1.87414	-2.83997	0.0045118	0.113315
WBGene00009383	185258		F35B12.3		protein_coding		1.687	2.84028	0.00450737	0.113315
WBGene00077770	7040162		M04D5.3		protein_coding	GO:0016020 (membrane); GO:0016021 (integral component of membrane)	-3.16988	-2.83938	0.00452012	0.113401
WBGene00010609	172794	1854	dut-1	DeoxyUTPase; Deoxyuridinetriphosphatase	protein_coding	GO:0000287 (magnesium ion binding); GO:0016787 (hydrolase activity); GO:0006226 (dUMP biosynthetic process); GO:0004170 (dUTP diphosphatase activity); GO:0046081 (dUTP catabolic process)	-1.74692	-2.83882	0.00452806	0.113477
WBGene00017671	172108		pgal-1	Probable peptidyl-alpha-hydroxyglycine alpha-amidating lyase pgal-1	protein_coding	GO:0006518 (peptide metabolic process); GO:0003824 (catalytic activity); GO:0016020 (membrane); GO:0005515 (protein binding)	1.66064	2.83828	0.00453577	0.113526
WBGene00020947	189124	340485	W02F12.2	Alkaline ceramidase	protein_coding	GO:0016020 (membrane); GO:0016021 (integral component of membrane); GO:0016787 (hydrolase activity); GO:0046872 (metal ion binding); GO:0006629 (lipid metabolic process); GO:0006672 (ceramide metabolic process); GO:0016811 (hydrolase activity, acting on carbon-nitrogen (but not peptide) bonds, in linear amides); GO:0017040 (N-acylsphingosine amidohydrolase activity); GO:0102121 (ceramidase activi…	2.14779	2.83799	0.00453986	0.113526
WBGene00044029	3565966		C05D12.7		protein_coding		2.08251	2.83539	0.004577	0.113852
WBGene00016088	180932		clec-266	C-type LECtin	protein_coding	GO:0030246 (carbohydrate binding); GO:0016020 (membrane); GO:0016021 (integral component of membrane)	1.79808	2.83567	0.00457304	0.113852
WBGene00018282	185612		F41D9.2		protein_coding		2.23042	2.83552	0.00457517	0.113852
WBGene00021941	176910		lgc-33	Ligand-Gated ion Channel	protein_coding	GO:0016020 (membrane); GO:0016021 (integral component of membrane); GO:0005230 (extracellular ligand-gated ion channel activity); GO:0006811 (ion transport); GO:0034220 (ion transmembrane transport)	2.07765	2.83535	0.00457753	0.113852
WBGene00011997	174729		nlp-51	Neuropeptide-Like Protein	protein_coding	GO:0007218 (neuropeptide signaling pathway)	2.22345	2.83539	0.00457691	0.113852
WBGene00008656	184307		lron-5	ELRR (Extracellular Leucine-Rich Repeat) ONly	protein_coding	GO:0016020 (membrane); GO:0016021 (integral component of membrane); GO:0005515 (protein binding)	2.06022	2.83369	0.00460138	0.114322
WBGene00001394	178293		fat-2	Delta(12) fatty acid desaturase fat-2	protein_coding	GO:0016717 (oxidoreductase activity, acting on paired donors, with oxidation of a pair of donors resulting in the reduction of molecular oxygen to two molecules of water); GO:0006629 (lipid metabolic process); GO:0055114 (oxidation-reduction process)	-1.67733	-2.83283	0.00461375	0.114506
WBGene00011486	180135		T05E12.3		protein_coding	GO:0051260 (protein homooligomerization); GO:0005515 (protein binding)	-2.49533	-2.83127	0.00463631	0.114943
WBGene00019254	186795		H31G24.3		protein_coding	GO:0005515 (protein binding)	-2.55976	-2.82994	0.00465569	0.115299
WBGene00001552	179887	2983	gcy-32	Soluble guanylate cyclase gcy-32	protein_coding	GO:0016849 (phosphorus-oxygen lyase activity); GO:0006182 (cGMP biosynthetic process); GO:0004383 (guanylate cyclase activity); GO:0009190 (cyclic nucleotide biosynthetic process); GO:0020037 (heme binding); GO:0035556 (intracellular signal transduction)	2.75771	2.8272	0.00469569	0.116166
WBGene00013845	175292		fbxa-37	F-box A protein	protein_coding	GO:0005515 (protein binding)	-1.77569	-2.82415	0.00474059	0.117151
WBGene00016677	175684		C45G9.6		protein_coding		1.73151	2.82372	0.00474704	0.117185
WBGene00003762	179594		nlp-24	Neuropeptide-Like Protein	protein_coding	GO:0007218 (neuropeptide signaling pathway)	1.98248	2.8232	0.00475466	0.117248
WBGene00013418	178456		Y65A5A.1		protein_coding		1.87572	2.8218	0.00477551	0.117636
WBGene00003765	178806		nlp-27	Neuropeptide-Like Protein	protein_coding	GO:0016020 (membrane); GO:0016021 (integral component of membrane); GO:0007218 (neuropeptide signaling pathway); GO:0050829 (defense response to Gram-negative bacterium)	1.92527	2.8204	0.00479637	0.118024
WBGene00007139	175564		mnp-1	Matrix non-peptidase homolog 1	protein_coding		1.76868	2.81996	0.0048029	0.118059
WBGene00007092	178165		B0001.7		protein_coding		-1.88447	-2.81938	0.00481165	0.118149
WBGene00006618	172688		trt-1	Telomerase reverse transcriptase	protein_coding	GO:0003677 (DNA binding); GO:0005634 (nucleus); GO:0046872 (metal ion binding); GO:0016740 (transferase activity); GO:0016779 (nucleotidyltransferase activity); GO:0005694 (chromosome); GO:0000781 (chromosome, telomeric region); GO:0003721 (telomerase RNA reverse transcriptase activity); GO:0003964 (RNA-directed DNA polymerase activity); GO:0007004 (telomere maintenance via telomerase)	-1.92463	-2.81655	0.0048543	0.11907
WBGene00011423	177869		ipla-7	Intracelllar PhosphoLipase A family	protein_coding	GO:0006629 (lipid metabolic process)	-1.68347	-2.81598	0.00486283	0.119152
WBGene00020433	188416		T11F8.1		protein_coding	GO:0016020 (membrane); GO:0016021 (integral component of membrane)	-2.48457	-2.81542	0.00487137	0.119235
WBGene00007229	182078		C01G6.9		protein_coding		2.1606	2.81381	0.00489574	0.119512
WBGene00019564	187208		K09D9.1		protein_coding	GO:0045087 (innate immune response)	-1.78203	-2.81388	0.00489479	0.119512
WBGene00011985	172852		T24D1.2		protein_coding	GO:0046872 (metal ion binding)	-1.75102	-2.81365	0.00489821	0.119512
WBGene00020613	188643	158046	T20D4.7		protein_coding		6.37278	2.81246	0.00491645	0.119831
WBGene00014261	174536	3738	shk-1	Potassium voltage-gated channel protein shk-1	protein_coding	GO:0008076 (voltage-gated potassium channel complex); GO:0005249 (voltage-gated potassium channel activity); GO:0051260 (protein homooligomerization); GO:0006811 (ion transport); GO:0005216 (ion channel activity); GO:0006813 (potassium ion transport); GO:0055085 (transmembrane transport); GO:0016020 (membrane); GO:0005515 (protein binding)	1.92529	2.81121	0.00493553	0.120169
WBGene00001113	177846		dur-1	Dauer Up-Regulated	protein_coding		-1.7429	-2.81078	0.00494222	0.120205
WBGene00014077	178102		ZK792.4		protein_coding	GO:0005515 (protein binding)	2.11705	2.8089	0.00497108	0.12078
WBGene00019092	178683		F59A7.5		protein_coding		1.88985	2.80779	0.00498828	0.12107
WBGene00013334	3565782		nlp-56	Neuropeptide-Like Protein	protein_coding	GO:0007218 (neuropeptide signaling pathway)	2.17844	2.80716	0.00499798	0.121179
WBGene00020126	259712		flp-26	FMRFamide-like neuropeptides 26 EFNADDLTLRF-amide GGAGEPLAFSPDMLSLRF-amide	protein_coding		1.94605	2.80462	0.00503764	0.122012
WBGene00044009	3565316		ZK822.6		protein_coding		5.62026	2.80311	0.00506124	0.122456
WBGene00013023	3564861		Y48G10A.6		protein_coding		3.14961	2.80124	0.00509071	0.12304
WBGene00015389	180812	948	scav-1	SCAVenger receptor (CD36 family) related	protein_coding	GO:0016020 (membrane); GO:0016021 (integral component of membrane); GO:0005737 (cytoplasm); GO:0006897 (endocytosis); GO:0005044 (scavenger receptor activity)	-1.74272	-2.79988	0.00511221	0.12343
WBGene00006146	191994		str-87	Seven TM Receptor	protein_coding	GO:0016020 (membrane); GO:0016021 (integral component of membrane); GO:0005887 (integral component of plasma membrane); GO:0050911 (detection of chemical stimulus involved in sensory perception of smell); GO:0007186 (G protein-coupled receptor signaling pathway); GO:0038022 (G protein-coupled olfactory receptor activity); GO:0042048 (olfactory behavior)	3.79895	2.79876	0.00512986	0.123727
WBGene00017303	184260		F09F7.6		protein_coding		-1.73223	-2.79743	0.00515114	0.124111
WBGene00011832	188583	2720	bgal-1	Beta-galactosidase	protein_coding	GO:0008152 (metabolic process); GO:0016787 (hydrolase activity); GO:0016798 (hydrolase activity, acting on glycosyl bonds); GO:0005975 (carbohydrate metabolic process); GO:0004553 (hydrolase activity, hydrolyzing O-glycosyl compounds); GO:0005773 (vacuole); GO:0004565 (beta-galactosidase activity)	1.69128	2.79589	0.00517567	0.124442
WBGene00021872	177068		clec-85	C-type LECtin	protein_coding	GO:0030246 (carbohydrate binding)	-2.08346	-2.79622	0.00517039	0.124442
WBGene00020103	187905		R148.4		protein_coding	GO:0016020 (membrane); GO:0016021 (integral component of membrane)	-2.33453	-2.79497	0.00519048	0.124669
WBGene00019289	174212		kcc-3	Potassium/chloride cotransporter 3	protein_coding	GO:0006811 (ion transport); GO:0055085 (transmembrane transport); GO:0022857 (transmembrane transporter activity); GO:0016020 (membrane); GO:0016021 (integral component of membrane)	2.109	2.79358	0.00521284	0.125076
WBGene00021146	189345		lgc-45	Ligand-Gated ion Channel	protein_coding	GO:0016020 (membrane); GO:0016021 (integral component of membrane); GO:0004888 (transmembrane signaling receptor activity); GO:0005216 (ion channel activity); GO:0005230 (extracellular ligand-gated ion channel activity); GO:0005886 (plasma membrane); GO:0006811 (ion transport); GO:0034220 (ion transmembrane transport); GO:0042391 (regulation of membrane potential); GO:0007268 (chemical synaptic t…	1.99598	2.79261	0.00522839	0.125189
WBGene00022781	173901		pmt-1	Phosphoethanolamine MethylTransferase	protein_coding	GO:0002119 (nematode larval development); GO:0005829 (cytosol); GO:0000234 (phosphoethanolamine N-methyltransferase activity); GO:0032504 (multicellular organism reproduction); GO:0070832 (phosphatidylcholine biosynthesis from phosphoryl-ethanolamine via N-dimethylethanolamine phosphate and CDP-choline)	-1.76935	-2.7929	0.00522383	0.125189
WBGene00016248	183043		C30B5.7		protein_coding	GO:0016020 (membrane); GO:0016021 (integral component of membrane)	2.42588	2.79228	0.00523382	0.125189
WBGene00219803			C06A1.12		ncRNA		-2.7769	-2.78905	0.00528634	0.125924
WBGene00003550	178595		nas-32	Zinc metalloproteinase nas-32	protein_coding	GO:0018996 (molting cycle, collagen and cuticulin-based cuticle); GO:0004222 (metalloendopeptidase activity); GO:0008237 (metallopeptidase activity); GO:0006508 (proteolysis); GO:0008270 (zinc ion binding)	2.0635	2.7891	0.00528549	0.125924
WBGene00004775	171912		sep-1	Separin homolog sep-1	protein_coding	GO:0005634 (nucleus); GO:0005737 (cytoplasm); GO:0016787 (hydrolase activity); GO:0006508 (proteolysis); GO:0008233 (peptidase activity); GO:0005856 (cytoskeleton); GO:0004197 (cysteine-type endopeptidase activity); GO:0005515 (protein binding); GO:0007049 (cell cycle); GO:0051301 (cell division); GO:0005813 (centrosome); GO:0005694 (chromosome); GO:0008234 (cysteine-type peptidase activity); GO:…	-1.71513	-2.7894	0.00528059	0.125924
WBGene00013193	190257		Y54E2A.8		protein_coding	GO:0046982 (protein heterodimerization activity)	-2.09154	-2.78967	0.00527625	0.125924
WBGene00021649	171928		Y47G6A.25		protein_coding		-2.0686	-2.78777	0.00530722	0.126291
WBGene00045188			B0284.5		pseudogene		-3.53333	-2.78123	0.00541531	0.128731
WBGene00000535	177372		cpi-1	Cystatin	protein_coding	GO:0005615 (extracellular space); GO:0010951 (negative regulation of endopeptidase activity); GO:0004869 (cysteine-type endopeptidase inhibitor activity); GO:0010466 (negative regulation of peptidase activity); GO:0030414 (peptidase inhibitor activity)	-1.71043	-2.77825	0.00546524	0.129784
WBGene00010268	174936		arrd-10	ARRestin Domain protein	protein_coding	GO:0005737 (cytoplasm); GO:0015031 (protein transport)	2.07463	2.77643	0.00549601	0.129903
WBGene00018050	185283		clec-139	C-type LECtin	protein_coding	GO:0030246 (carbohydrate binding)	2.60007	2.77629	0.00549836	0.129903
WBGene00007103	179439	51232	crm-1	CRiM (Cysteine Rich motor neuron protein) homolog	protein_coding	GO:0016020 (membrane); GO:0016021 (integral component of membrane); GO:0004867 (serine-type endopeptidase inhibitor activity); GO:0010951 (negative regulation of endopeptidase activity); GO:0005515 (protein binding); GO:0005576 (extracellular region); GO:0005520 (insulin-like growth factor binding)	1.66957	2.77643	0.00549596	0.129903
WBGene00018300	3564882		F41G3.3		protein_coding		2.51626	2.77714	0.00548393	0.129903
WBGene00002086	191684		ins-3	Probable insulin-like peptide beta-type 3	protein_coding	GO:0005179 (hormone activity); GO:0005576 (extracellular region)	1.80808	2.77697	0.00548677	0.129903
WBGene00019668	187316		fil-2	Fasting Induced Lipase	protein_coding	GO:0016787 (hydrolase activity); GO:0016298 (lipase activity); GO:0016042 (lipid catabolic process)	-11.686	-2.77581	0.00550643	0.129961
WBGene00010409	186758		H21P03.2	Non-structural maintenance of chromosomes element 4	protein_coding	GO:0005634 (nucleus); GO:0006281 (DNA repair); GO:0006974 (cellular response to DNA damage stimulus); GO:0006310 (DNA recombination); GO:0030915 (Smc5-Smc6 complex)	-1.79118	-2.77504	0.00551949	0.130136
WBGene00001046	171870	5611	dnj-28	DNaJ domain (Prokaryotic heat shock protein)	protein_coding	GO:0005783 (endoplasmic reticulum); GO:0051787 (misfolded protein binding); GO:0034975 (protein folding in endoplasmic reticulum); GO:0051087 (chaperone binding); GO:0005515 (protein binding)	-1.88473	-2.77297	0.00555478	0.130692
WBGene00018275	173816		F41C3.11		protein_coding	GO:0016020 (membrane); GO:0016021 (integral component of membrane)	2.10349	2.77296	0.00555498	0.130692
WBGene00022200	180582	55711	fard-1	Fatty acyl-CoA reductase	protein_coding	GO:0043231 (intracellular membrane-bounded organelle); GO:0016491 (oxidoreductase activity); GO:0005777 (peroxisome); GO:0006629 (lipid metabolic process); GO:0035336 (long-chain fatty-acyl-CoA metabolic process); GO:0080019 (fatty-acyl-CoA reductase (alcohol-forming) activity); GO:0102965 (alcohol-forming fatty acyl-CoA reductase activity)	-1.94295	-2.77266	0.00556003	0.130692
WBGene00018137	175946		bath-41	BTB and MATH domain-containing protein 41	protein_coding	GO:0005515 (protein binding)	-1.77545	-2.77109	0.00558682	0.131176
WBGene00010848	3565135		M04B2.6		protein_coding		1.9486	2.77063	0.00559476	0.131176
WBGene00003606	178035		nhr-7	Nuclear hormone receptor family member nhr-7	protein_coding	GO:0043565 (sequence-specific DNA binding); GO:0003700 (DNA-binding transcription factor activity); GO:0008270 (zinc ion binding); GO:0006355 (regulation of transcription, DNA-templated)	2.10727	2.77046	0.00559766	0.131176
WBGene00016458	183243		C35E7.6		protein_coding	GO:0006914 (autophagy); GO:0005737 (cytoplasm)	1.74923	2.76995	0.00560657	0.131252
WBGene00019006	172369	23111	spg-20	SPG (Spastic paraplegia)	protein_coding	GO:0016020 (membrane); GO:0005886 (plasma membrane); GO:0005778 (peroxisomal membrane); GO:0030514 (negative regulation of BMP signaling pathway); GO:0005780 (extrinsic component of intraperoxisomal membrane); GO:0045033 (peroxisome inheritance); GO:0051301 (cell division)	-1.71642	-2.76839	0.00563345	0.131747
WBGene00007109	178047		edg-1	Enlarged Deps-1 Granule phenotype	protein_coding	GO:0005515 (protein binding)	-1.79008	-2.76499	0.00569248	0.132993
WBGene00003856	180959		odr-10	Serpentine receptor class r-10	protein_coding		2.57991	2.76352	0.00571822	0.13346
WBGene00010221	181381		F57G12.1		protein_coding		1.70587	2.76285	0.00572993	0.133548
WBGene00003219	181362		mes-1		protein_coding	GO:0004713 (protein tyrosine kinase activity); GO:0004672 (protein kinase activity); GO:0006468 (protein phosphorylation); GO:0005524 (ATP binding)	-1.94457	-2.76264	0.00573357	0.133548
WBGene00015496	182274		C05E11.7		protein_coding		5.06809	2.76231	0.00573937	0.133549
WBGene00021535	175864	9429	wht-7	WHiTe (Drosophila) related ABC transporter	protein_coding	GO:0016020 (membrane); GO:0016021 (integral component of membrane); GO:0005524 (ATP binding); GO:0055085 (transmembrane transport); GO:0005886 (plasma membrane); GO:0000166 (nucleotide binding); GO:0042626 (ATPase-coupled transmembrane transporter activity); GO:0016887 (ATPase activity)	-1.80265	-2.76147	0.0057541	0.133757
WBGene00020582	188609		oig-8	One IG domain	protein_coding	GO:0016020 (membrane); GO:0016021 (integral component of membrane)	3.73623	2.76084	0.00576532	0.133883
WBGene00004309	182417		rap-3	RAP homolog (Vertebrate Rap GTPase family)	protein_coding	GO:0003924 (GTPase activity); GO:0005525 (GTP binding); GO:0016020 (membrane); GO:0005886 (plasma membrane); GO:0000166 (nucleotide binding); GO:0007165 (signal transduction); GO:0030336 (negative regulation of cell migration); GO:0019003 (GDP binding); GO:0032486 (Rap protein signal transduction)	2.70398	2.75993	0.00578141	0.134122
WBGene00012261	181295		lpr-3	LiPocalin-Related protein	protein_coding	GO:0006869 (lipid transport); GO:0005576 (extracellular region)	1.90119	2.75896	0.00579861	0.134386
WBGene00020224	188085		T05A7.7		protein_coding		2.51492	2.75766	0.00582172	0.134786
WBGene00008879	181519		F16B12.1		protein_coding	GO:0016020 (membrane); GO:0016021 (integral component of membrane)	-2.0011	-2.75657	0.00584106	0.134829
WBGene00015536	182330		glb-2	GLoBin related	protein_coding	GO:0019825 (oxygen binding); GO:0020037 (heme binding)	2.57893	2.75688	0.0058355	0.134829
WBGene00006629	192059		tsp-3	TetraSPanin family	protein_coding	GO:0016020 (membrane); GO:0016021 (integral component of membrane); GO:0005887 (integral component of plasma membrane)	1.85501	2.75691	0.00583501	0.134829
WBGene00000055	179235	1139	acr-16	Acetylcholine receptor subunit alpha-type acr-16	protein_coding	GO:0005230 (extracellular ligand-gated ion channel activity); GO:0034220 (ion transmembrane transport); GO:0045211 (postsynaptic membrane); GO:0022848 (acetylcholine-gated cation-selective channel activity); GO:0006811 (ion transport); GO:0005216 (ion channel activity); GO:0004888 (transmembrane signaling receptor activity); GO:0016021 (integral component of membrane)	1.99168	2.75559	0.0058586	0.134839
WBGene00004226	171816		ptr-12	PaTched Related family	protein_coding	GO:0016020 (membrane); GO:0016021 (integral component of membrane); GO:0005886 (plasma membrane); GO:0030659 (cytoplasmic vesicle membrane); GO:0006897 (endocytosis); GO:0018996 (molting cycle, collagen and cuticulin-based cuticle); GO:0045138 (nematode male tail tip morphogenesis)	1.7558	2.75557	0.00585903	0.134839
WBGene00011062	187640		R06C7.2		protein_coding	GO:0000795 (synaptonemal complex); GO:0007129 (homologous chromosome pairing at meiosis); GO:0016925 (protein sumoylation); GO:0019789 (SUMO transferase activity)	-2.80996	-2.75598	0.00585171	0.134839
WBGene00002891	175895	51144	let-767	Very-long-chain 3-oxooacyl-coA reductase let-767	protein_coding	GO:0016491 (oxidoreductase activity); GO:0055114 (oxidation-reduction process); GO:0005783 (endoplasmic reticulum); GO:0018996 (molting cycle, collagen and cuticulin-based cuticle); GO:0030283 (testosterone dehydrogenase [NAD(P)] activity); GO:0050062 (long-chain-fatty-acyl-CoA reductase activity); GO:0006694 (steroid biosynthetic process); GO:0008209 (androgen metabolic process); GO:0008210 (est…	-1.63817	-2.7539	0.00588892	0.135124
WBGene00044206	3564973		T26H5.9		protein_coding		-1.93845	-2.75413	0.00588487	0.135124
WBGene00012428	177745		Y11D7A.3		protein_coding	GO:0016020 (membrane); GO:0016021 (integral component of membrane)	1.90687	2.75441	0.00587983	0.135124
WBGene00001665	179319		gpa-3	Guanine nucleotide-binding protein alpha-3 subunit	protein_coding	GO:0007188 (adenylate cyclase-modulating G protein-coupled receptor signaling pathway); GO:0019001 (guanyl nucleotide binding); GO:0031683 (G-protein beta/gamma-subunit complex binding); GO:0003924 (GTPase activity); GO:0005525 (GTP binding); GO:0007186 (G protein-coupled receptor signaling pathway); GO:0007165 (signal transduction)	2.5021	2.75315	0.0059024	0.135299
WBGene00001783	259481	27306	gst-35	Glutathione S-Transferase	protein_coding	GO:0016740 (transferase activity); GO:0006749 (glutathione metabolic process); GO:0004364 (glutathione transferase activity); GO:0005515 (protein binding)	2.08885	2.75147	0.00593289	0.135765
WBGene00003861	190105		oig-3	One IG domain	protein_coding		1.84274	2.75073	0.00594625	0.135765
WBGene00011409	3565201	2632	T04A8.7	Alpha-amylase	protein_coding	GO:0005737 (cytoplasm); GO:0003824 (catalytic activity); GO:0016740 (transferase activity); GO:0005975 (carbohydrate metabolic process); GO:0004553 (hydrolase activity, hydrolyzing O-glycosyl compounds); GO:0043169 (cation binding); GO:0005978 (glycogen biosynthetic process); GO:0003844 (1,4-alpha-glucan branching enzyme activity); GO:0102752 (1,4-alpha-glucan branching enzyme activity (using a g…	-1.67758	-2.75089	0.00594334	0.135765
WBGene00021730	190089		Y49F6C.8		protein_coding		-2.11018	-2.75113	0.00593899	0.135765
WBGene00006746	180961	9423	unc-6	Netrin unc-6	protein_coding	GO:0005576 (extracellular region); GO:0009888 (tissue development); GO:1905488 (positive regulation of anterior/posterior axon guidance); GO:0007399 (nervous system development); GO:0097374 (sensory neuron axon guidance); GO:1905489 (regulation of sensory neuron axon guidance); GO:0008045 (motor neuron axon guidance); GO:0051965 (positive regulation of synapse assembly); GO:0097376 (interneuron a…	1.70189	2.74932	0.00597188	0.136215
WBGene00007242	175118		madf-5	MADF domain transcription factor	protein_coding	GO:0005634 (nucleus); GO:0003677 (DNA binding); GO:0005667 (transcription regulator complex); GO:0006357 (regulation of transcription by RNA polymerase II)	1.89384	2.74842	0.00598828	0.136408
WBGene00044512	3896854		W03F9.11		protein_coding		1.91524	2.74821	0.00599214	0.136408
WBGene00015560	180726		C07A12.2		protein_coding		2.9954	2.74713	0.00601191	0.136509
WBGene00009724	179718		F45D3.4		protein_coding		1.74066	2.74668	0.00602021	0.136509
WBGene00018707	178643		oac-31	O-ACyltransferase homolog	protein_coding	GO:0016020 (membrane); GO:0016021 (integral component of membrane); GO:0016747 (transferase activity, transferring acyl groups other than amino-acyl groups)	-1.85875	-2.74747	0.00600563	0.136509
WBGene00011288	187891		R102.1		protein_coding		3.94771	2.74686	0.00601684	0.136509
WBGene00003996	172262		pgp-2	ABC transporter PGP-2; p-GlycoProtein related	protein_coding	GO:0016020 (membrane); GO:0016021 (integral component of membrane); GO:0005524 (ATP binding); GO:0000166 (nucleotide binding); GO:0055085 (transmembrane transport); GO:0042626 (ATPase-coupled transmembrane transporter activity); GO:0019915 (lipid storage); GO:0044841 (gut granule membrane); GO:0006996 (organelle organization); GO:0016887 (ATPase activity)	1.79486	2.74526	0.00604632	0.136967
WBGene00001452	178232		flp-9	FMRFamide-like neuropeptides 9 KPSFVRF-amide 1 KPSFVRF-amide 2	protein_coding		1.65196	2.74407	0.00606822	0.137328
WBGene00015182	181986		B0416.7		protein_coding		2.97912	2.74293	0.00608932	0.137402
WBGene00016003	174104		C18H9.5		protein_coding	GO:0016020 (membrane); GO:0016021 (integral component of membrane); GO:0022857 (transmembrane transporter activity); GO:0055085 (transmembrane transport)	3.0681	2.74295	0.00608904	0.137402
WBGene00007801	178118	8989	trpa-1	Transient receptor potential cation channel subfamily A member 1 homolog	protein_coding	GO:0016020 (membrane); GO:0016021 (integral component of membrane); GO:0005216 (ion channel activity); GO:0005886 (plasma membrane); GO:0006811 (ion transport); GO:0034220 (ion transmembrane transport); GO:0055085 (transmembrane transport); GO:0050896 (response to stimulus); GO:0097730 (non-motile cilium); GO:0043025 (neuronal cell body); GO:0005515 (protein binding)	1.84654	2.74303	0.00608751	0.137402
WBGene00019617	180915		K10C2.1	Carboxypeptidase	protein_coding	GO:0016787 (hydrolase activity); GO:0006508 (proteolysis); GO:0008233 (peptidase activity); GO:0004185 (serine-type carboxypeptidase activity); GO:0004180 (carboxypeptidase activity); GO:0045121 (membrane raft)	1.69701	2.74012	0.0061416	0.138312
WBGene00077766	7040131		rgba-1	Regulatory Gene for Behavioral Aging	protein_coding		-12.2251	-2.74014	0.00614124	0.138312
WBGene00020461	173782		T12C9.7		protein_coding	GO:0005634 (nucleus); GO:0005737 (cytoplasm); GO:0005813 (centrosome); GO:0000079 (regulation of cyclin-dependent protein serine/threonine kinase activity); GO:0000307 (cyclin-dependent protein kinase holoenzyme complex); GO:0016538 (cyclin-dependent protein serine/threonine kinase regulator activity); GO:0044772 (mitotic cell cycle phase transition)	-2.18363	-2.73888	0.00616487	0.138701
WBGene00013459	259603		Y67A10A.10		protein_coding		2.03757	2.73854	0.00617135	0.138711
WBGene00006666	179088		twk-11	TWiK family of potassium channels	protein_coding	GO:0016020 (membrane); GO:0016021 (integral component of membrane); GO:0006811 (ion transport); GO:0005267 (potassium channel activity); GO:0071805 (potassium ion transmembrane transport); GO:0005887 (integral component of plasma membrane); GO:0022841 (potassium ion leak channel activity); GO:0030322 (stabilization of membrane potential)	2.69767	2.73729	0.00619472	0.139101
WBGene00013443	176583		such-1	Suppressor of spindle checkpoint defect 1	protein_coding	GO:0016567 (protein ubiquitination); GO:0007275 (multicellular organism development); GO:0007049 (cell cycle); GO:0051301 (cell division); GO:0051321 (meiotic cell cycle); GO:0005680 (anaphase-promoting complex); GO:0070979 (protein K11-linked ubiquitination); GO:0045842 (positive regulation of mitotic metaphase/anaphase transition); GO:0031145 (anaphase-promoting complex-dependent catabolic proc…	-1.88432	-2.73583	0.0062224	0.139587
WBGene00017992	177535		F32E10.5		protein_coding		-1.8612	-2.73375	0.00626181	0.140335
WBGene00020436	175887	144193	T12A2.1		protein_coding	GO:0016787 (hydrolase activity); GO:0005737 (cytoplasm); GO:0016810 (hydrolase activity, acting on carbon-nitrogen (but not peptide) bonds); GO:0016812 (hydrolase activity, acting on carbon-nitrogen (but not peptide) bonds, in cyclic amides); GO:0006547 (histidine metabolic process); GO:0006548 (histidine catabolic process); GO:0019556 (histidine catabolic process to glutamate and formamide); GO:…	1.9263	2.73275	0.00628076	0.140623
WBGene00003890	191740		osm-10	Major sperm protein	protein_coding	GO:0005856 (cytoskeleton); GO:0043025 (neuronal cell body); GO:0005737 (cytoplasm); GO:0030424 (axon); GO:0043005 (neuron projection); GO:0005034 (osmosensor activity); GO:0007231 (osmosensory signaling pathway)	2.1128	2.7319	0.00629708	0.140852
WBGene00015134	173789		B0304.2		protein_coding		-2.01527	-2.73138	0.00630701	0.140938
WBGene00021541	189844		Y42H9B.3		protein_coding		-1.80607	-2.73079	0.00631835	0.141055
WBGene00022037	171643	51703	acs-13	Fatty Acid CoA Synthetase family	protein_coding	GO:0016020 (membrane); GO:0005783 (endoplasmic reticulum); GO:0004467 (long-chain fatty acid-CoA ligase activity); GO:0001676 (long-chain fatty acid metabolic process)	-1.715	-2.72957	0.00634174	0.141304
WBGene00018237	180613		irg-7		protein_coding		1.63124	2.72974	0.00633843	0.141304
WBGene00013390	190460		Y62H9A.2		protein_coding		-2.23221	-2.72922	0.0063485	0.141318
WBGene00000240	174401	5053	pah-1	Phenylalanine-4-hydroxylase	protein_coding	GO:0016714 (oxidoreductase activity, acting on paired donors, with incorporation or reduction of molecular oxygen, reduced pteridine as one donor, and incorporation of one atom of oxygen); GO:0004505 (phenylalanine 4-monooxygenase activity); GO:0006559 (L-phenylalanine catabolic process); GO:0009072 (aromatic amino acid family metabolic process); GO:0005506 (iron ion binding); GO:0004497 (monooxy…	1.64147	2.72871	0.00635823	0.141399
WBGene00000727	186300		col-154	COLlagen	protein_coding	GO:0016020 (membrane); GO:0016021 (integral component of membrane); GO:0042302 (structural constituent of cuticle)	2.46631	2.72818	0.00636844	0.14149
WBGene00007452	182419		C08F11.3		protein_coding	GO:0016020 (membrane); GO:0016021 (integral component of membrane)	-4.49199	-2.72723	0.00638683	0.141626
WBGene00016504	259632		C37C3.12		protein_coding	GO:0016020 (membrane); GO:0016021 (integral component of membrane); GO:0005634 (nucleus); GO:0005737 (cytoplasm); GO:0006606 (protein import into nucleus)	2.08738	2.72725	0.00638649	0.141626
WBGene00010041	174369		F54C9.3		protein_coding		-1.81426	-2.72675	0.0063961	0.141695
WBGene00008037			C40C9.4		protein_coding		-2.28244	-2.72636	0.00640367	0.141727
WBGene00012959	190008		Y47H10A.3		protein_coding	GO:0005634 (nucleus); GO:0016787 (hydrolase activity); GO:0046872 (metal ion binding); GO:0000166 (nucleotide binding); GO:0003723 (RNA binding); GO:0005829 (cytosol); GO:0004518 (nuclease activity); GO:0000956 (nuclear-transcribed mRNA catabolic process); GO:0090305 (nucleic acid phosphodiester bond hydrolysis); GO:0034353 (); GO:0110155 (NAD-cap decapping)	-3.0827	-2.726	0.00641077	0.141749
WBGene00045390	6418706		C38C3.10		protein_coding		2.35331	2.72493	0.00643159	0.141777
WBGene00010468	186847		K01D12.9		protein_coding		-15.3571	-2.72475	0.00643494	0.141777
WBGene00018402	185719		kvs-3		protein_coding	GO:0016020 (membrane); GO:0016021 (integral component of membrane); GO:0005216 (ion channel activity); GO:0006811 (ion transport); GO:0055085 (transmembrane transport); GO:0071805 (potassium ion transmembrane transport); GO:0005244 (voltage-gated ion channel activity); GO:0034765 (regulation of ion transmembrane transport); GO:0005249 (voltage-gated potassium channel activity); GO:0005267 (potass…	2.44202	2.72497	0.00643082	0.141777
WBGene00044779	4363099		T10H9.8		protein_coding	GO:0005509 (calcium ion binding)	1.84211	2.72435	0.00644272	0.141777
WBGene00021795	173765		Y52E8A.2		protein_coding	GO:0046872 (metal ion binding); GO:0005515 (protein binding)	-2.1221	-2.72462	0.00643757	0.141777
WBGene00019458	187078		K06H7.7		protein_coding		-1.917	-2.72391	0.00645143	0.141808
WBGene00010976	179956		R02D5.1		protein_coding	GO:0005515 (protein binding)	1.81097	2.72365	0.00645643	0.141808
WBGene00022283	173802		lgc-27	Ligand-Gated ion Channel	protein_coding	GO:0016020 (membrane); GO:0016021 (integral component of membrane); GO:0004888 (transmembrane signaling receptor activity); GO:0005216 (ion channel activity); GO:0005230 (extracellular ligand-gated ion channel activity); GO:0006811 (ion transport); GO:0034220 (ion transmembrane transport); GO:0042391 (regulation of membrane potential); GO:0007268 (chemical synaptic transmission); GO:0043005 (neur…	2.15577	2.72292	0.00647087	0.14199
WBGene00018269	173820		acs-11	Fatty Acid CoA Synthetase family	protein_coding	GO:0006631 (fatty acid metabolic process); GO:0031956 (medium-chain fatty acid-CoA ligase activity)	-1.66883	-2.721	0.00650841	0.142304
WBGene00008824	184491		F14H3.5		protein_coding		-2.26984	-2.72146	0.00649937	0.142304
WBGene00001447	174568		flp-4	FMRF-Like Peptide; FMRFamide-like peptide 4	protein_coding	GO:0005576 (extracellular region); GO:0007218 (neuropeptide signaling pathway)	1.81825	2.72093	0.0065098	0.142304
WBGene00004304	174332	1104	ran-3	Regulator of chromosome condensation	protein_coding	GO:0005737 (cytoplasm); GO:0005634 (nucleus); GO:0003682 (chromatin binding); GO:0007049 (cell cycle); GO:0050790 (regulation of catalytic activity); GO:0051301 (cell division); GO:0005085 (guanyl-nucleotide exchange factor activity); GO:0009792 (embryo development ending in birth or egg hatching); GO:0110039 (positive regulation of nematode male tail tip morphogenesis); GO:0031291 (Ran protein s…	-1.67096	-2.72141	0.00650048	0.142304
WBGene00019989	181088		R09F10.8		protein_coding		-1.80192	-2.72053	0.00651768	0.142342
WBGene00008076	259591		lgc-43	Ligand-Gated ion Channel	protein_coding	GO:0016020 (membrane); GO:0016021 (integral component of membrane); GO:0004888 (transmembrane signaling receptor activity); GO:0005216 (ion channel activity); GO:0005230 (extracellular ligand-gated ion channel activity); GO:0005886 (plasma membrane); GO:0006811 (ion transport); GO:0034220 (ion transmembrane transport); GO:0042391 (regulation of membrane potential); GO:0007268 (chemical synaptic t…	2.20169	2.72018	0.00652458	0.142358
WBGene00004127	180399		abu-12	Activated in Blocked Unfolded protein response	protein_coding	GO:0031151 (histone methyltransferase activity (H3-K79 specific)); GO:0034729 (histone H3-K79 methylation); GO:0051726 (regulation of cell cycle)	4.90958	2.71926	0.00654291	0.142586
WBGene00021781	173521		Y51H7C.3		protein_coding		-1.84749	-2.71903	0.00654738	0.142586
WBGene00006615	192056	7223	trp-2	TRP (Transient receptor potential) channel family; TRP homlogous cation channel protein	protein_coding	GO:0016020 (membrane); GO:0016021 (integral component of membrane); GO:0005216 (ion channel activity); GO:0006811 (ion transport); GO:0055085 (transmembrane transport); GO:0005887 (integral component of plasma membrane); GO:0070588 (calcium ion transmembrane transport); GO:0005262 (calcium channel activity); GO:0051480 (regulation of cytosolic calcium ion concentration); GO:0006828 (manganese ion…	1.977	2.71852	0.00655753	0.142673
WBGene00021372	177139		ugt-45	UDP-GlucuronosylTransferase	protein_coding	GO:0016020 (membrane); GO:0016021 (integral component of membrane); GO:0016740 (transferase activity); GO:0043231 (intracellular membrane-bounded organelle); GO:0015020 (glucuronosyltransferase activity); GO:0016757 (transferase activity, transferring glycosyl groups); GO:0008194 (UDP-glycosyltransferase activity)	1.79307	2.71752	0.00657733	0.142969
WBGene00011487	180136		T05E12.6		protein_coding		1.87673	2.71627	0.00660211	0.143373
WBGene00006440	171913		tag-63		protein_coding		-1.89792	-2.71239	0.00668	0.144928
WBGene00003754	177387		nlp-16	Neuropeptide-Like Protein	protein_coding	GO:0007218 (neuropeptide signaling pathway)	1.86754	2.71109	0.00670618	0.145359
WBGene00010985	181634		R03A10.5		protein_coding		1.70731	2.70962	0.00673611	0.145871
WBGene00016180	182978		C28C12.4		protein_coding		2.26889	2.70912	0.00674629	0.145955
WBGene00009094	179695		F23H12.5		protein_coding	GO:0007411 (axon guidance); GO:0030215 (semaphorin receptor binding); GO:0030335 (positive regulation of cell migration); GO:0045499 (chemorepellent activity); GO:0048843 (negative regulation of axon extension involved in axon guidance); GO:0071526 (semaphorin-plexin signaling pathway); GO:0050919 (negative chemotaxis)	3.00371	2.70766	0.00677588	0.146184
WBGene00002252	173771		lat-2	Latrophilin-like protein LAT-2	protein_coding	GO:0030246 (carbohydrate binding); GO:0004888 (transmembrane signaling receptor activity); GO:0007166 (cell surface receptor signaling pathway); GO:0004930 (G protein-coupled receptor activity); GO:0007186 (G protein-coupled receptor signaling pathway); GO:0016021 (integral component of membrane); GO:0016020 (membrane)	2.38168	2.70799	0.00676916	0.146184
WBGene00021192	173735		Y14H12B.2		protein_coding		-1.83293	-2.70787	0.00677171	0.146184
WBGene00011410	259502		T04A8.8		protein_coding		-1.69561	-2.70731	0.00678312	0.146204
WBGene00000625	171873		col-48	COLlagen	protein_coding	GO:0016020 (membrane); GO:0016021 (integral component of membrane); GO:0042302 (structural constituent of cuticle)	1.90451	2.7032	0.00686746	0.147884
WBGene00016169	259768		C27F2.7	Uncharacterized F-box protein C27F2.7	protein_coding	GO:0005515 (protein binding)	-1.96192	-2.70063	0.00692076	0.148893
WBGene00010008	186192		F53H4.3		protein_coding		3.07876	2.69957	0.00694299	0.149232
WBGene00018200	173673		btb-17	BTB (Broad/complex/Tramtrack/Bric a brac) domain protein	protein_coding	GO:0005515 (protein binding)	-2.2574	-2.6992	0.00695057	0.149256
WBGene00016996	180484		D1005.2	UTP--glucose-1-phosphate uridylyltransferase	protein_coding	GO:0005737 (cytoplasm); GO:0016740 (transferase activity); GO:0016779 (nucleotidyltransferase activity); GO:0005978 (glycogen biosynthetic process); GO:0070569 (uridylyltransferase activity); GO:0003983 (UTP:glucose-1-phosphate uridylyltransferase activity); GO:0005977 (glycogen metabolic process); GO:0006011 (UDP-glucose metabolic process)	-1.73987	-2.69613	0.00701493	0.150499
WBGene00007904	181517	4126	C33G3.4	Probable beta-mannosidase	protein_coding	GO:0005764 (lysosome); GO:0008152 (metabolic process); GO:0016787 (hydrolase activity); GO:0016798 (hydrolase activity, acting on glycosyl bonds); GO:0005975 (carbohydrate metabolic process); GO:0006516 (glycoprotein catabolic process); GO:0004553 (hydrolase activity, hydrolyzing O-glycosyl compounds); GO:0004567 (beta-mannosidase activity)	1.87996	2.6949	0.00704089	0.150915
WBGene00018569	180673	5613	F47F2.1	cAMP-dependent protein kinase, catalytic subunit-like	protein_coding	GO:0005524 (ATP binding); GO:0004672 (protein kinase activity); GO:0006468 (protein phosphorylation); GO:0016301 (kinase activity); GO:0016310 (phosphorylation); GO:0018105 (peptidyl-serine phosphorylation); GO:0000166 (nucleotide binding); GO:0016740 (transferase activity); GO:0004674 (protein serine/threonine kinase activity); GO:0007165 (signal transduction); GO:0004691 (cAMP-dependent protein…	1.79965	2.6895	0.00715594	0.153239
WBGene00020722	188778		T23B12.8	Glycoprotein hormone beta 5	protein_coding	GO:0005576 (extracellular region); GO:0005737 (cytoplasm); GO:0009755 (hormone-mediated signaling pathway); GO:0005615 (extracellular space); GO:0007186 (G protein-coupled receptor signaling pathway); GO:0005179 (hormone activity)	1.67969	2.68734	0.00720228	0.154089
WBGene00018656	180520	51060	txdc-12.2	ThioredoXin Domain Containing protein homolog	protein_coding	GO:0016491 (oxidoreductase activity); GO:0005783 (endoplasmic reticulum); GO:0060548 (negative regulation of cell death)	1.74412	2.68414	0.00727169	0.15543
WBGene00000641	187138		col-65	COLlagen	protein_coding	GO:0042302 (structural constituent of cuticle)	-4.2096	-2.68243	0.00730887	0.155936
WBGene00008823	180076		F14H3.4		protein_coding		-1.9058	-2.68248	0.00730787	0.155936
WBGene00020741	188808		dlhd-1	DieneLactone Hydrolase Domain containing protein	protein_coding	GO:0016787 (hydrolase activity)	-2.11794	-2.67788	0.00740896	0.157926
WBGene00013881	177726	11253	mans-4	alpha-1,2-Mannosidase	protein_coding	GO:0016020 (membrane); GO:0016021 (integral component of membrane); GO:0005509 (calcium ion binding); GO:0004571 (mannosyl-oligosaccharide 1,2-alpha-mannosidase activity); GO:0008152 (metabolic process); GO:0016787 (hydrolase activity); GO:0016798 (hydrolase activity, acting on glycosyl bonds); GO:0005975 (carbohydrate metabolic process); GO:0005783 (endoplasmic reticulum); GO:0030433 (ubiquitin-…	-1.8414	-2.67626	0.00744488	0.158545
WBGene00007622	175537	55972	C16C10.1	Uncharacterized mitochondrial carrier C16C10.1	protein_coding	GO:0016020 (membrane); GO:0016021 (integral component of membrane); GO:0005739 (mitochondrion); GO:0005743 (mitochondrial inner membrane)	-1.82968	-2.67192	0.00754182	0.160462
WBGene00022181	190610	55	pho-9	Intestinal acid PHOsphatase	protein_coding	GO:0016311 (dephosphorylation); GO:0016791 (phosphatase activity)	-2.0554	-2.67057	0.00757228	0.160962
WBGene00007590	182609		ttr-43	TransThyretin-Related family domain	protein_coding	GO:0005576 (extracellular region); GO:0009986 (cell surface)	2.30073	2.66984	0.00758883	0.161165
WBGene00008174	183569		C48B4.11		protein_coding		-1.89303	-2.66819	0.00762618	0.16177
WBGene00016844	177555	8801	sucg-1	Succinate--CoA ligase [GDP-forming] subunit beta, mitochondrial	protein_coding	GO:0005524 (ATP binding); GO:0003824 (catalytic activity); GO:0046872 (metal ion binding); GO:0000166 (nucleotide binding); GO:0005525 (GTP binding); GO:0016874 (ligase activity); GO:0005739 (mitochondrion); GO:0006099 (tricarboxylic acid cycle); GO:0000287 (magnesium ion binding); GO:0004775 (succinate-CoA ligase (ADP-forming) activity); GO:0004776 (succinate-CoA ligase (GDP-forming) activity); …	-1.70445	-2.66796	0.00763133	0.16177
WBGene00013270	174872		Y57A10A.31		protein_coding	GO:0046872 (metal ion binding); GO:0016740 (transferase activity); GO:0043161 (proteasome-mediated ubiquitin-dependent protein catabolic process); GO:0016491 (oxidoreductase activity); GO:0000151 (ubiquitin ligase complex); GO:0004842 (ubiquitin-protein transferase activity); GO:0043130 (ubiquitin binding); GO:0071797 (LUBAC complex); GO:0097039 (protein linear polyubiquitination)	-1.69712	-2.66681	0.00765742	0.162175
WBGene00015605	182405		C08E3.13		protein_coding		-5.34087	-2.66478	0.00770384	0.162769
WBGene00008392	183933		D1086.5		protein_coding		-1.82364	-2.66447	0.00771108	0.162769
WBGene00008677	180085		F11A5.9		protein_coding	GO:0016020 (membrane); GO:0016021 (integral component of membrane); GO:0022857 (transmembrane transporter activity); GO:0055085 (transmembrane transport)	-1.78463	-2.66435	0.00771367	0.162769
WBGene00011352	172647	6195	rskn-1	Putative ribosomal protein S6 kinase alpha-1	protein_coding	GO:0004672 (protein kinase activity); GO:0004674 (protein serine/threonine kinase activity); GO:0035556 (intracellular signal transduction); GO:0006468 (protein phosphorylation); GO:0000287 (magnesium ion binding); GO:0005524 (ATP binding); GO:0016301 (kinase activity); GO:0016310 (phosphorylation); GO:0000166 (nucleotide binding); GO:0016740 (transferase activity); GO:0106310 (protein serine kin…	-1.64142	-2.66525	0.0076931	0.162769
WBGene00015398	182175		tag-293		protein_coding		65.0883	2.66341	0.00773527	0.163076
WBGene00018215	180433		igcm-1	ImmunoGlobulin-like Cell adhesion Molecule family	protein_coding	GO:0016020 (membrane); GO:0016021 (integral component of membrane); GO:0098609 (cell-cell adhesion); GO:0005887 (integral component of plasma membrane); GO:0050839 (cell adhesion molecule binding); GO:0005911 (cell-cell junction); GO:0005515 (protein binding)	1.89908	2.66179	0.00777254	0.163712
WBGene00015313	172175		hpo-32		protein_coding		-2.11177	-2.66095	0.00779207	0.163825
WBGene00050899	13217259		T10C6.15		protein_coding	GO:0005515 (protein binding)	-2.48018	-2.66122	0.00778591	0.163825
WBGene00018954	176039		F56C9.11		protein_coding		-1.87277	-2.65971	0.00782082	0.16428
WBGene00019979	178634	6515	R09B5.11	Facilitated glucose transporter homolog	protein_coding	GO:0016020 (membrane); GO:0016021 (integral component of membrane); GO:0005886 (plasma membrane); GO:0022857 (transmembrane transporter activity); GO:0055085 (transmembrane transport)	1.95191	2.65737	0.00787536	0.165275
WBGene00019261	175401		H34I24.2		protein_coding		-2.14319	-2.65393	0.00795595	0.166815
WBGene00021213	171666	1358	Y18H1A.9		protein_coding	GO:0016787 (hydrolase activity); GO:0046872 (metal ion binding); GO:0008270 (zinc ion binding); GO:0006508 (proteolysis); GO:0008233 (peptidase activity); GO:0008237 (metallopeptidase activity); GO:0005615 (extracellular space); GO:0004181 (metallocarboxypeptidase activity); GO:0004180 (carboxypeptidase activity)	2.91164	2.65072	0.00803205	0.168258
WBGene00002089	191687		ins-6	Probable insulin-like peptide beta-type 5	protein_coding	GO:0005179 (hormone activity); GO:0005576 (extracellular region)	3.00794	2.64863	0.00808191	0.169149
WBGene00018005	185230		nlp-62	Neuropeptide-Like Protein	protein_coding	GO:0007218 (neuropeptide signaling pathway); GO:0050829 (defense response to Gram-negative bacterium)	2.08891	2.64573	0.00815147	0.170451
WBGene00015549	177472		C06G3.3		protein_coding		-1.63034	-2.64369	0.00820089	0.171174
WBGene00013901	191171		ugt-16	UDP-glucuronosyltransferase	protein_coding	GO:0016020 (membrane); GO:0016021 (integral component of membrane); GO:0016740 (transferase activity); GO:0043231 (intracellular membrane-bounded organelle); GO:0015020 (glucuronosyltransferase activity); GO:0016757 (transferase activity, transferring glycosyl groups); GO:0008194 (UDP-glycosyltransferase activity)	-6.41007	-2.64392	0.00819523	0.171174
WBGene00019234	186768		ugt-8	UDP-GlucuronosylTransferase	protein_coding	GO:0016020 (membrane); GO:0016021 (integral component of membrane); GO:0016740 (transferase activity); GO:0043231 (intracellular membrane-bounded organelle); GO:0015020 (glucuronosyltransferase activity); GO:0016757 (transferase activity, transferring glycosyl groups); GO:0008194 (UDP-glycosyltransferase activity)	2.47366	2.64253	0.00822894	0.171605
WBGene00022590	191143		ZC317.7		protein_coding		-3.08962	-2.64211	0.00823922	0.171664
WBGene00020215	180425	60496	T04G9.4		protein_coding	GO:0016740 (transferase activity); GO:0005829 (cytosol); GO:0000287 (magnesium ion binding); GO:0019878 (lysine biosynthetic process via aminoadipic acid); GO:0008897 (holo-[acyl-carrier-protein] synthase activity)	1.79498	2.64133	0.00825822	0.171905
WBGene00008940	181474		F18H3.4		protein_coding	GO:1990904 (ribonucleoprotein complex); GO:0005783 (endoplasmic reticulum); GO:0008298 (intracellular mRNA localization); GO:0042175 (nuclear outer membrane-endoplasmic reticulum membrane network); GO:0045087 (innate immune response)	-1.65686	-2.64	0.00829063	0.172361
WBGene00009621	181238		fipr-21	FIP (Fungus-Induced Protein) Related	protein_coding		1.93272	2.63951	0.00830251	0.172361
WBGene00007041	174730		tag-180		protein_coding	GO:0016020 (membrane); GO:0016021 (integral component of membrane); GO:0006811 (ion transport); GO:0005891 (voltage-gated calcium channel complex); GO:0006816 (calcium ion transport); GO:0005245 (voltage-gated calcium channel activity); GO:0070588 (calcium ion transmembrane transport)	1.76399	2.63954	0.00830178	0.172361
WBGene00006640	180761		tsp-14	Tetraspanin-14	protein_coding	GO:0016020 (membrane); GO:0016021 (integral component of membrane); GO:0005886 (plasma membrane); GO:0005887 (integral component of plasma membrane); GO:0005515 (protein binding); GO:0040026 (positive regulation of vulval development); GO:0042661 (regulation of mesodermal cell fate specification); GO:0040019 (positive regulation of embryonic development); GO:1901046 (positive regulation of ovipos…	1.79583	2.63827	0.00833299	0.172838
WBGene00004017	185024		phg-1	Growth arrest-specific protein 1 homolog	protein_coding		2.76373	2.63665	0.00837296	0.173512
WBGene00271827	34700646		T19H12.15		protein_coding		3.82372	2.63443	0.0084279	0.174338
WBGene00006870	181251	5080	vab-3	MAB-18	protein_coding	GO:0003677 (DNA binding); GO:0005634 (nucleus); GO:0005737 (cytoplasm); GO:0006355 (regulation of transcription, DNA-templated); GO:0007275 (multicellular organism development); GO:0005515 (protein binding); GO:0000978 (RNA polymerase II cis-regulatory region sequence-specific DNA binding); GO:0000981 (DNA-binding transcription factor activity, RNA polymerase II-specific); GO:0006357 (regulation …	1.89033	2.63471	0.00842081	0.174338
WBGene00015425	178978		C04E6.11		protein_coding	GO:0005515 (protein binding)	-1.81986	-2.63395	0.00843985	0.174429
WBGene00012753	176599		Y41C4A.6		protein_coding		3.42466	2.63284	0.00846748	0.174843
WBGene00022553	191108		ZC204.1		protein_coding		-28.7754	-2.6321	0.00848589	0.175067
WBGene00019337	3565220		K02F6.3		protein_coding	GO:0016020 (membrane); GO:0016021 (integral component of membrane); GO:0005515 (protein binding)	-1.62662	-2.62994	0.00853995	0.176025
WBGene00021866	190276		Y54F10BM.12		protein_coding		-1.81849	-2.62764	0.00859794	0.177062
WBGene00012062	188945		T26G10.5		protein_coding		3.16765	2.62612	0.00863644	0.177697
WBGene00007333	3565222		ufd-3	Ubiquitin fusion degradation protein 3 homolog	protein_coding	GO:0005634 (nucleus); GO:0005737 (cytoplasm); GO:0043161 (proteasome-mediated ubiquitin-dependent protein catabolic process); GO:0005515 (protein binding); GO:0010992 (ubiquitin recycling); GO:0043130 (ubiquitin binding)	-1.61926	-2.62375	0.00869667	0.178777
WBGene00000233	179834	2741	avr-15		protein_coding	GO:0016020 (membrane); GO:0016021 (integral component of membrane); GO:0004888 (transmembrane signaling receptor activity); GO:0005216 (ion channel activity); GO:0005230 (extracellular ligand-gated ion channel activity); GO:0005886 (plasma membrane); GO:0006811 (ion transport); GO:0034220 (ion transmembrane transport); GO:0042391 (regulation of membrane potential); GO:0007268 (chemical synaptic t…	1.89645	2.62141	0.00875681	0.179534
WBGene00007283	179560		clec-222	C-type LECtin	protein_coding	GO:0030246 (carbohydrate binding)	-1.62269	-2.62197	0.0087424	0.179534
WBGene00003758	177542		nlp-20	Neuropeptide-Like Protein	protein_coding	GO:0007218 (neuropeptide signaling pathway)	1.59957	2.6215	0.00875425	0.179534
WBGene00016421	172260		cdc-7	Cell Division Cycle related	protein_coding	GO:0005634 (nucleus); GO:0005524 (ATP binding); GO:0005737 (cytoplasm); GO:0004672 (protein kinase activity); GO:0004674 (protein serine/threonine kinase activity); GO:0006468 (protein phosphorylation); GO:0016301 (kinase activity); GO:0016310 (phosphorylation); GO:0018105 (peptidyl-serine phosphorylation); GO:0000166 (nucleotide binding)	-1.78325	-2.61906	0.00881716	0.180451
WBGene00206525	13189130		R74.10		protein_coding		1.95681	2.61912	0.0088158	0.180451
WBGene00007430	179408		C08B6.10		protein_coding		1.86385	2.61832	0.00883644	0.180526
WBGene00010357	181617		H03A11.2		protein_coding	GO:0005856 (cytoskeleton); GO:0008017 (microtubule binding); GO:0034453 (microtubule anchoring)	2.19239	2.61861	0.00882897	0.180526
WBGene00001855	178866		hil-4	Histone H1.4	protein_coding	GO:0006334 (nucleosome assembly); GO:0000786 (nucleosome); GO:0003677 (DNA binding)	-1.6949	-2.61768	0.00885294	0.180674
WBGene00017154	180969		ugt-57	UDP-GlucuronosylTransferase	protein_coding	GO:0016020 (membrane); GO:0016021 (integral component of membrane); GO:0016740 (transferase activity); GO:0043231 (intracellular membrane-bounded organelle); GO:0015020 (glucuronosyltransferase activity); GO:0016757 (transferase activity, transferring glycosyl groups); GO:0008194 (UDP-glycosyltransferase activity)	2.04767	2.61744	0.00885933	0.180674
WBGene00017597	177226		F19C7.8		protein_coding	GO:0031234 (extrinsic component of cytoplasmic side of plasma membrane); GO:0003009 (skeletal muscle contraction); GO:1901387 (positive regulation of voltage-gated calcium channel activity); GO:1903078 (positive regulation of protein localization to plasma membrane); GO:0005515 (protein binding)	1.86851	2.61596	0.00889763	0.181295
WBGene00015819	173757		fbxc-44	F-box C protein	protein_coding		-1.90221	-2.60903	0.00908001	0.184808
WBGene00018833	176236		ztf-1	Zinc finger transcription factor family protein 1	protein_coding	GO:0005634 (nucleus); GO:0046872 (metal ion binding); GO:0003677 (DNA binding); GO:0043565 (sequence-specific DNA binding); GO:0000981 (DNA-binding transcription factor activity, RNA polymerase II-specific); GO:0006357 (regulation of transcription by RNA polymerase II)	-1.84524	-2.6088	0.00908601	0.184808
WBGene00008440	259387		DY3.8		protein_coding	GO:0016020 (membrane); GO:0016021 (integral component of membrane)	-1.81691	-2.60798	0.0091078	0.185088
WBGene00020662	178615		T21H3.1		protein_coding	GO:0006629 (lipid metabolic process)	-1.59164	-2.60727	0.00912671	0.185309
WBGene00010363	186678		H04D03.2		protein_coding	GO:0003682 (chromatin binding); GO:0035064 (methylated histone binding); GO:0097240 (chromosome attachment to the nuclear envelope); GO:0010468 (regulation of gene expression); GO:0000793 (condensed chromosome); GO:0005637 (nuclear inner membrane)	-1.96407	-2.60621	0.00915505	0.185721
WBGene00015692	172087		ugt-25	UDP-glucuronosyltransferase	protein_coding	GO:0016020 (membrane); GO:0016021 (integral component of membrane); GO:0016740 (transferase activity); GO:0043231 (intracellular membrane-bounded organelle); GO:0015020 (glucuronosyltransferase activity); GO:0016757 (transferase activity, transferring glycosyl groups); GO:0008194 (UDP-glycosyltransferase activity)	2.65447	2.60583	0.00916525	0.185765
WBGene00017364	184314		clec-7	C-type LECtin	protein_coding	GO:0030246 (carbohydrate binding); GO:0050830 (defense response to Gram-positive bacterium)	-2.06626	-2.60523	0.00918124	0.185926
WBGene00007440	182409		C08E8.4		protein_coding	GO:0045087 (innate immune response)	-1.7911	-2.60449	0.0092011	0.186165
WBGene00003757	266950		nlp-19	Neuropeptide-Like Protein	protein_coding	GO:0007218 (neuropeptide signaling pathway)	2.59854	2.60345	0.00922911	0.186568
WBGene00016392	172968	6389	sdha-2	Succinate dehydrogenase [ubiquinone] flavoprotein subunit, mitochondrial	protein_coding	GO:0016020 (membrane); GO:0016491 (oxidoreductase activity); GO:0009055 (electron transfer activity); GO:0016627 (oxidoreductase activity, acting on the CH-CH group of donors); GO:0050660 (flavin adenine dinucleotide binding); GO:0006099 (tricarboxylic acid cycle); GO:0005743 (mitochondrial inner membrane); GO:0000104 (succinate dehydrogenase activity); GO:0005749 (mitochondrial respiratory chain…	-1.67684	-2.60309	0.00923876	0.1866
WBGene00001856	172242		hil-5	Histone H1.5	protein_coding	GO:0006334 (nucleosome assembly); GO:0000786 (nucleosome); GO:0003677 (DNA binding)	-1.67167	-2.60272	0.00924865	0.186637
WBGene00001053	179347	1814	dop-2	D2-like dopamine receptor long variant; DOPamine receptor	protein_coding	GO:0004930 (G protein-coupled receptor activity); GO:0007186 (G protein-coupled receptor signaling pathway); GO:0016021 (integral component of membrane); GO:0016020 (membrane); GO:0005886 (plasma membrane); GO:0007268 (chemical synaptic transmission); GO:0007165 (signal transduction); GO:0005887 (integral component of plasma membrane); GO:0005515 (protein binding); GO:0090326 (positive regulation…	1.93003	2.60072	0.00930295	0.187569
WBGene00020846	180649		T27A10.6		protein_coding		1.63346	2.59942	0.00933806	0.188113
WBGene00007277	172812	25842	asfl-1	Probable histone chaperone asf-1-like protein	protein_coding	GO:0006337 (nucleosome disassembly); GO:0042393 (histone binding); GO:0006333 (chromatin assembly or disassembly); GO:0016573 (histone acetylation); GO:0006334 (nucleosome assembly); GO:0005634 (nucleus)	-1.78719	-2.59878	0.00935561	0.188302
WBGene00018694	3565082		F52E1.5		protein_coding	GO:0045087 (innate immune response)	2.2697	2.59746	0.00939173	0.188864
WBGene00000716	179073		col-143	COLlagen	protein_coding	GO:0016020 (membrane); GO:0016021 (integral component of membrane); GO:0042302 (structural constituent of cuticle)	1.70876	2.59661	0.00941493	0.189002
WBGene00001457	176708		flp-14	FMRFamide-like neuropeptides 14 KHEYLRF-amide 1 KHEYLRF-amide 2 KHEYLRF-amide 3 KHEYLRF-amide 4	protein_coding	GO:0007218 (neuropeptide signaling pathway)	1.64953	2.5968	0.00940967	0.189002
WBGene00012251	180298		clec-49	C-type LECtin	protein_coding	GO:0038023 (signaling receptor activity); GO:0030246 (carbohydrate binding); GO:0005576 (extracellular region); GO:0048029 (monosaccharide binding)	-1.71947	-2.59554	0.0094443	0.189168
WBGene00002061	178536	1977	ife-3	Eukaryotic translation initiation factor 4E-3	protein_coding	GO:0006413 (translational initiation); GO:0003743 (translation initiation factor activity); GO:0005737 (cytoplasm); GO:0003723 (RNA binding)	-1.6315	-2.59511	0.00945595	0.189168
WBGene00004120	174955		pqn-32	Prion-like-(Q/N-rich)-domain-bearing protein	protein_coding		4.01334	2.59524	0.00945254	0.189168
WBGene00005078	173296	2444	src-2	Tyrosine protein-kinase src-2	protein_coding	GO:0005524 (ATP binding); GO:0004672 (protein kinase activity); GO:0006468 (protein phosphorylation); GO:0016301 (kinase activity); GO:0016310 (phosphorylation); GO:0046872 (metal ion binding); GO:0000166 (nucleotide binding); GO:0016740 (transferase activity); GO:0004713 (protein tyrosine kinase activity); GO:0004715 (non-membrane spanning protein tyrosine kinase activity); GO:0018108 (peptidyl-…	2.00513	2.59516	0.00945456	0.189168
WBGene00012794	177993		Y43E12A.2		protein_coding	GO:0046872 (metal ion binding); GO:0005739 (mitochondrion)	1.62785	2.59459	0.00947034	0.189292
WBGene00009643	174952		F42G4.6		protein_coding		-3.02301	-2.59039	0.00958675	0.191453
WBGene00011768	174415		oac-46	O-ACyltransferase homolog	protein_coding	GO:0016020 (membrane); GO:0016021 (integral component of membrane); GO:0016747 (transferase activity, transferring acyl groups other than amino-acyl groups)	1.73904	2.58978	0.0096036	0.191506
WBGene00010663	176812	23048	toca-2	Transducer of Cdc42-dependent actin assembly protein 2 homolog	protein_coding	GO:0016020 (membrane); GO:0005886 (plasma membrane); GO:0005737 (cytoplasm); GO:0031410 (cytoplasmic vesicle); GO:0007165 (signal transduction); GO:0005515 (protein binding); GO:0030054 (cell junction); GO:0005768 (endosome); GO:0005911 (cell-cell junction); GO:0006897 (endocytosis); GO:1901046 (positive regulation of oviposition); GO:2000370 (positive regulation of clathrin-dependent endocytosis…	-1.65628	-2.5897	0.00960596	0.191506
WBGene00017962	185173		fbxa-72	F-box A protein	protein_coding		1.96954	2.58865	0.00963528	0.191594
WBGene00012650	176486		orc-1	Origin recognition complex subunit 1	protein_coding	GO:0005524 (ATP binding); GO:0005634 (nucleus); GO:0000166 (nucleotide binding); GO:0003677 (DNA binding); GO:0016887 (ATPase activity); GO:0006260 (DNA replication); GO:0003688 (DNA replication origin binding); GO:0005664 (nuclear origin of replication recognition complex); GO:0006270 (DNA replication initiation); GO:0033314 (mitotic DNA replication checkpoint)	-1.69341	-2.58901	0.00962523	0.191594
WBGene00021818	175417	80168	Y53G8B.2		protein_coding	GO:0016020 (membrane); GO:0016021 (integral component of membrane); GO:0016740 (transferase activity); GO:0016746 (transferase activity, transferring acyl groups); GO:0016747 (transferase activity, transferring acyl groups other than amino-acyl groups); GO:0005789 (endoplasmic reticulum membrane); GO:0005783 (endoplasmic reticulum); GO:0006629 (lipid metabolic process); GO:0004144 (diacylglycerol…	-1.73789	-2.58892	0.00962783	0.191594
WBGene00013729	3565020		Y111B2A.3		protein_coding		-1.7652	-2.58823	0.00964715	0.191666
WBGene00015355	180656		C02F12.5	BPTI/Kunitz inhibitor domain-containing protein C02F12.5	protein_coding	GO:0004867 (serine-type endopeptidase inhibitor activity); GO:0010951 (negative regulation of endopeptidase activity); GO:0010466 (negative regulation of peptidase activity); GO:0030414 (peptidase inhibitor activity); GO:0003674 (molecular_function); GO:0005575 (cellular_component); GO:0008150 (biological_process)	-2.08046	-2.58622	0.00970362	0.191682
WBGene00008330	179580		C55A6.1		protein_coding	GO:0005634 (nucleus); GO:0005737 (cytoplasm); GO:0046872 (metal ion binding); GO:0016740 (transferase activity); GO:0006511 (ubiquitin-dependent protein catabolic process); GO:0016567 (protein ubiquitination); GO:0061630 (ubiquitin protein ligase activity); GO:0008270 (zinc ion binding); GO:0016055 (Wnt signaling pathway); GO:0004842 (ubiquitin-protein transferase activity); GO:0005829 (cytosol);…	-1.66706	-2.5873	0.00967315	0.191682
WBGene00008595	179953		clec-56	C-type LECtin	protein_coding	GO:0030246 (carbohydrate binding)	-3.79672	-2.58617	0.00970482	0.191682
WBGene00000681	176961		col-107	COLlagen	protein_coding	GO:0016020 (membrane); GO:0016021 (integral component of membrane); GO:0042302 (structural constituent of cuticle)	-2.99083	-2.58716	0.00967708	0.191682
WBGene00044198	3565248		F56H9.6		protein_coding		5.73118	2.58613	0.00970605	0.191682
WBGene00001992	191682		hot-7	Homolog of Odr-2 (Two); Ly-6-related protein HOT-7	protein_coding		2.79328	2.5879	0.00965639	0.191682
WBGene00011268	176514		pde-12	PhosphoDiEsterase	protein_coding	GO:0005739 (mitochondrion); GO:0090305 (nucleic acid phosphodiester bond hydrolysis); GO:0004527 (exonuclease activity); GO:0000288 (nuclear-transcribed mRNA catabolic process, deadenylation-dependent decay); GO:0000175 (3'-5'-exoribonuclease activity); GO:0090503 (RNA phosphodiester bond hydrolysis, exonucleolytic)	-1.7662	-2.58664	0.0096916	0.191682
WBGene00008387	172637		zhp-2	Zip (Yeast meiotic zipper) Homologous Protein	protein_coding	GO:0046872 (metal ion binding); GO:0005515 (protein binding); GO:0005694 (chromosome); GO:0006310 (DNA recombination); GO:0000795 (synaptonemal complex); GO:0007129 (homologous chromosome pairing at meiosis); GO:0016925 (protein sumoylation); GO:0019789 (SUMO transferase activity); GO:0051321 (meiotic cell cycle); GO:0007131 (reciprocal meiotic recombination)	-2.059	-2.58372	0.00977424	0.192864
WBGene00044502	3896769		C46G7.5		protein_coding		-5.01939	-2.58335	0.00978454	0.192902
WBGene00003482	176430		mua-3	Transmembrane cell adhesion receptor mua-3	protein_coding	GO:0005509 (calcium ion binding); GO:0005515 (protein binding)	1.71053	2.58302	0.00979395	0.192923
WBGene00006729	179315	9481	ucp-4	UnCoupling Protein (Mitochondrial substrate carrier)	protein_coding	GO:0016020 (membrane); GO:0016021 (integral component of membrane); GO:0009409 (response to cold)	-1.72444	-2.58225	0.00981595	0.193192
WBGene00007679	176611		C18D11.1		protein_coding	GO:0016020 (membrane); GO:0016021 (integral component of membrane)	1.79854	2.58179	0.00982887	0.193281
WBGene00010191	186437		dmsr-1	DroMyoSuppressin Receptor related	protein_coding	GO:0016020 (membrane); GO:0016021 (integral component of membrane); GO:0005886 (plasma membrane); GO:0004930 (G protein-coupled receptor activity); GO:0007165 (signal transduction); GO:0007186 (G protein-coupled receptor signaling pathway); GO:0007218 (neuropeptide signaling pathway); GO:0008528 (G protein-coupled peptide receptor activity); GO:0008188 (neuropeptide receptor activity); GO:0045187…	1.80352	2.58149	0.00983758	0.193288
WBGene00019772	176875		M04G7.1		protein_coding		2.58214	2.57894	0.00991044	0.194554
WBGene00006374	177647		syx-4	Putative syntaxin-4	protein_coding	GO:0016020 (membrane); GO:0016021 (integral component of membrane); GO:0005886 (plasma membrane); GO:0006886 (intracellular protein transport); GO:0016192 (vesicle-mediated transport); GO:0000149 (SNARE binding); GO:0031201 (SNARE complex); GO:0005515 (protein binding); GO:0005484 (SNAP receptor activity); GO:0006887 (exocytosis); GO:0006906 (vesicle fusion); GO:0031629 (synaptic vesicle fusion t…	-1.8815	-2.57821	0.00993145	0.194801
WBGene00235291	24104148		C01G5.25		protein_coding		2.20871	2.57682	0.00997133	0.195418
WBGene00015381	180910		C03B1.13		protein_coding	GO:0016020 (membrane); GO:0016021 (integral component of membrane); GO:0022857 (transmembrane transporter activity); GO:0055085 (transmembrane transport)	-1.66064	-2.57513	0.0100203	0.196045
WBGene00020560	175215		T19C3.2		protein_coding		4.02022	2.57535	0.0100138	0.196045
WBGene00003767	178805		nlp-29	Neuropeptide-like protein 29 QWGYGGY-amide GYGGYGGY-amide GMYGGY-amide GMYGGW-amide	protein_coding		1.76911	2.57439	0.0100416	0.19613
WBGene00020933	189111	55314	W02D3.4		protein_coding	GO:0016020 (membrane); GO:0016021 (integral component of membrane); GO:0015144 (carbohydrate transmembrane transporter activity); GO:0034219 (carbohydrate transmembrane transport)	-1.64882	-2.57449	0.0100387	0.19613
WBGene00005657	182569		srr-6	Serpentine Receptor, class R	protein_coding	GO:0016020 (membrane); GO:0016021 (integral component of membrane)	-2.054	-2.57405	0.0100517	0.19616
WBGene00007926	183201		C34C12.7		protein_coding	GO:0016020 (membrane); GO:0016021 (integral component of membrane)	2.06425	2.57353	0.0100667	0.196288
WBGene00001044	178171		dnj-26	DNaJ domain (Prokaryotic heat shock protein)	protein_coding	GO:0016020 (membrane); GO:0016021 (integral component of membrane); GO:0005789 (endoplasmic reticulum membrane); GO:0030433 (ubiquitin-dependent ERAD pathway); GO:0051085 (chaperone cofactor-dependent protein refolding); GO:0030544 (Hsp70 protein binding); GO:0071218 (cellular response to misfolded protein)	-2.09935	-2.57261	0.0100936	0.196646
WBGene00018636	177529		oef-1	Oocyte Excluded Factor	protein_coding		-1.75871	-2.57203	0.0101104	0.196808
WBGene00007176	180280		kcnl-1	KCNN (Potassium K ChaNNel, calcium activated)-Like	protein_coding	GO:0016020 (membrane); GO:0016021 (integral component of membrane); GO:0006811 (ion transport); GO:0005886 (plasma membrane); GO:0043005 (neuron projection); GO:0071805 (potassium ion transmembrane transport); GO:0006813 (potassium ion transport); GO:0005516 (calmodulin binding); GO:0043025 (neuronal cell body); GO:0015269 (calcium-activated potassium channel activity); GO:0016286 (small conducta…	1.71324	2.57126	0.0101329	0.19708
WBGene00001482	180321		fog-2	Feminization Of Germline	protein_coding	GO:0005515 (protein binding); GO:0005737 (cytoplasm); GO:0017148 (negative regulation of translation); GO:0030371 (translation repressor activity); GO:0040021 (hermaphrodite germ-line sex determination); GO:0007283 (spermatogenesis); GO:1900195 (positive regulation of oocyte maturation); GO:2000648 (positive regulation of stem cell proliferation); GO:2000738 (positive regulation of stem cell diff…	-1.93701	-2.57072	0.0101487	0.197222
WBGene00014230	176425		gtf-2H3	General Transcription Factor homolog	protein_coding	GO:0005634 (nucleus); GO:0006355 (regulation of transcription, DNA-templated); GO:0000439 (transcription factor TFIIH core complex); GO:0005675 (transcription factor TFIIH holo complex); GO:0006289 (nucleotide-excision repair); GO:0070816 (phosphorylation of RNA polymerase II C-terminal domain)	-1.76469	-2.57026	0.0101623	0.197319
WBGene00006602	181778		tps-1	Alpha,alpha-trehalose-phosphate synthase [UDP-forming] 1	protein_coding	GO:0003824 (catalytic activity); GO:0016740 (transferase activity); GO:0005829 (cytosol); GO:0016757 (transferase activity, transferring glycosyl groups); GO:0003825 (alpha,alpha-trehalose-phosphate synthase (UDP-forming) activity); GO:0005946 (alpha,alpha-trehalose-phosphate synthase complex (UDP-forming)); GO:0005992 (trehalose biosynthetic process)	-1.59999	-2.5677	0.0102375	0.198445
WBGene00013246	190331		Y57A10A.1		protein_coding		-2.40448	-2.56779	0.0102348	0.198445
WBGene00016063	182851		delm-2	DEgenerin Linked to Mechanosensation	protein_coding	GO:0016020 (membrane); GO:0016021 (integral component of membrane); GO:0006811 (ion transport); GO:0005887 (integral component of plasma membrane); GO:0005272 (sodium channel activity); GO:0006814 (sodium ion transport); GO:0035725 (sodium ion transmembrane transport); GO:0015280 (ligand-gated sodium channel activity)	72.7922	2.56534	0.0103074	0.199634
WBGene00015049	181853		B0218.5		protein_coding	GO:0005634 (nucleus); GO:0005524 (ATP binding); GO:0005737 (cytoplasm); GO:0004672 (protein kinase activity); GO:0004674 (protein serine/threonine kinase activity); GO:0006468 (protein phosphorylation); GO:0016301 (kinase activity); GO:0016310 (phosphorylation); GO:0018105 (peptidyl-serine phosphorylation); GO:0000166 (nucleotide binding)	9.3915	2.56465	0.0103281	0.199795
WBGene00003000	172893		lin-11		protein_coding	GO:0000981 (DNA-binding transcription factor activity, RNA polymerase II-specific); GO:0006355 (regulation of transcription, DNA-templated); GO:0003677 (DNA binding)	1.6247	2.56419	0.0103417	0.199795
WBGene00022597	191152		ZC395.5		protein_coding		-1.76996	-2.56443	0.0103344	0.199795
WBGene00001898	181545		his-24	Histone H1.1	protein_coding	GO:0006334 (nucleosome assembly); GO:0000786 (nucleosome); GO:0003677 (DNA binding)	1.62389	2.56349	0.0103625	0.200031
WBGene00008537			F02H6.4		pseudogene		-2.12555	-2.56107	0.010435	0.200758
WBGene00044987	4926914		K07A1.17		protein_coding	GO:0016020 (membrane); GO:0016021 (integral component of membrane)	-1.91176	-2.5614	0.0104251	0.200758
WBGene00005759	183379		srw-12	Serpentine Receptor, class W	protein_coding	GO:0016020 (membrane); GO:0016021 (integral component of membrane); GO:0005886 (plasma membrane); GO:0007186 (G protein-coupled receptor signaling pathway); GO:0008528 (G protein-coupled peptide receptor activity)	-2.22518	-2.56129	0.0104283	0.200758
WBGene00012210	189120		W02D9.4		protein_coding		-2.34252	-2.56123	0.0104302	0.200758
WBGene00013235	190329		Y56A3A.16		protein_coding	GO:0043231 (intracellular membrane-bounded organelle); GO:1901981 (phosphatidylinositol phosphate binding)	-1.72176	-2.56012	0.0104636	0.201142
WBGene00006541	181639	1621	tbh-1	Tyramine beta-hydroxylase	protein_coding	GO:0016020 (membrane); GO:0016021 (integral component of membrane); GO:0003824 (catalytic activity); GO:0046872 (metal ion binding); GO:0016491 (oxidoreductase activity); GO:0005615 (extracellular space); GO:0004497 (monooxygenase activity); GO:0005507 (copper ion binding); GO:0016715 (oxidoreductase activity, acting on paired donors, with incorporation or reduction of molecular oxygen, reduced a…	-1.9245	-2.55856	0.0105107	0.201879
WBGene00016259	172136		C30F8.3		protein_coding		2.64678	2.55714	0.0105537	0.202481
WBGene00000618	181610		col-41	COLlagen	protein_coding	GO:0042302 (structural constituent of cuticle)	13.739	2.55608	0.0105859	0.202481
WBGene00020819	175923		T26A5.2		protein_coding		-1.80394	-2.5562	0.0105823	0.202481
WBGene00007513	178069		wht-2	WHiTe (Drosophila) related ABC transporter	protein_coding	GO:0016020 (membrane); GO:0016021 (integral component of membrane); GO:0005524 (ATP binding); GO:0055085 (transmembrane transport); GO:0005886 (plasma membrane); GO:0000166 (nucleotide binding); GO:0042626 (ATPase-coupled transmembrane transporter activity); GO:0016887 (ATPase activity)	-1.7735	-2.55609	0.0105855	0.202481
WBGene00022709	191295		ZK354.8	Tyrosine-protein phosphatase	protein_coding	GO:0004725 (protein tyrosine phosphatase activity); GO:0006470 (protein dephosphorylation); GO:0035335 (peptidyl-tyrosine dephosphorylation); GO:0016311 (dephosphorylation); GO:0016791 (phosphatase activity)	-1.80828	-2.55608	0.0105858	0.202481
WBGene00020727	188781		npr-21	NeuroPeptide Receptor family	protein_coding	GO:0016020 (membrane); GO:0016021 (integral component of membrane); GO:0004930 (G protein-coupled receptor activity); GO:0007186 (G protein-coupled receptor signaling pathway); GO:0005887 (integral component of plasma membrane); GO:0007218 (neuropeptide signaling pathway); GO:0008528 (G protein-coupled peptide receptor activity)	2.20073	2.55507	0.0106167	0.202903
WBGene00017698	176213		F22B7.9		protein_coding		-1.58607	-2.55374	0.0106573	0.203509
WBGene00018959	186375		F56D1.1	Putative zinc finger protein F56D1.1	protein_coding	GO:0005634 (nucleus); GO:0046872 (metal ion binding); GO:0003677 (DNA binding); GO:0043565 (sequence-specific DNA binding); GO:0000981 (DNA-binding transcription factor activity, RNA polymerase II-specific); GO:0006357 (regulation of transcription by RNA polymerase II)	-1.74192	-2.55126	0.0107336	0.204194
WBGene00001812	174204	23457	haf-2	HAlF transporter (PGP related)	protein_coding	GO:0016020 (membrane); GO:0016021 (integral component of membrane); GO:0005524 (ATP binding); GO:0000166 (nucleotide binding); GO:0055085 (transmembrane transport); GO:0042626 (ATPase-coupled transmembrane transporter activity); GO:0002376 (immune system process); GO:0098656 (anion transmembrane transport); GO:0015833 (peptide transport); GO:1904680 (peptide transmembrane transporter activity); G…	-1.58366	-2.55137	0.0107301	0.204194
WBGene00011735	176794	6767	hip-1	Hsp-70 Interacting Protein homolog	protein_coding	GO:0046983 (protein dimerization activity); GO:0031072 (heat shock protein binding); GO:0051085 (chaperone cofactor-dependent protein refolding); GO:0005783 (endoplasmic reticulum); GO:0055120 (striated muscle dense body); GO:0030017 (sarcomere); GO:0065003 (protein-containing complex assembly); GO:0005515 (protein binding)	-1.57932	-2.55123	0.0107342	0.204194
WBGene00007605	182635		hrg-7	Heme Responsive protein	protein_coding	GO:0005764 (lysosome); GO:0016787 (hydrolase activity); GO:0006508 (proteolysis); GO:0008233 (peptidase activity); GO:0005576 (extracellular region); GO:0004190 (aspartic-type endopeptidase activity); GO:0008219 (cell death)	-2.28317	-2.551	0.0107414	0.204194
WBGene00004144	187826		pqn-60	Prion-like-(Q/N-rich)-domain-bearing protein	protein_coding	GO:0005515 (protein binding)	2.51794	2.55214	0.0107064	0.204194
WBGene00011691	180071		T10C6.10		protein_coding	GO:0005515 (protein binding)	-2.38951	-2.55085	0.0107461	0.204194
WBGene00007343	181427		C05E7.1		protein_coding		2.17077	2.55005	0.0107708	0.204495
WBGene00002079	171621		xpo-2	EXPOrtin (Nuclear export receptor)	protein_coding	GO:0006886 (intracellular protein transport); GO:0005829 (cytosol); GO:0006606 (protein import into nucleus); GO:0005635 (nuclear envelope); GO:0005049 (nuclear export signal receptor activity); GO:0006611 (protein export from nucleus); GO:0005515 (protein binding); GO:0031267 (small GTPase binding)	-1.6519	-2.54972	0.0107811	0.204522
WBGene00002229	176750	24137	klp-19	Kinesin-like protein	protein_coding	GO:0005524 (ATP binding); GO:0000166 (nucleotide binding); GO:0003774 (motor activity); GO:0003777 (microtubule motor activity); GO:0007018 (microtubule-based movement); GO:0008017 (microtubule binding); GO:0005871 (kinesin complex); GO:0005874 (microtubule); GO:0051257 (meiotic spindle midzone assembly); GO:0010032 (meiotic chromosome condensation); GO:0000794 (condensed nuclear chromosome); GO:…	-1.65676	-2.54897	0.0108042	0.204792
WBGene00022345	190774		fbxa-138	F-box A protein	protein_coding	GO:0016020 (membrane); GO:0016021 (integral component of membrane); GO:0005515 (protein binding)	-3.0998	-2.54852	0.0108181	0.204888
WBGene00009921	172614		F52B5.2		protein_coding	GO:0005634 (nucleus); GO:0005524 (ATP binding); GO:0005737 (cytoplasm); GO:0004672 (protein kinase activity); GO:0004674 (protein serine/threonine kinase activity); GO:0006468 (protein phosphorylation); GO:0016301 (kinase activity); GO:0016310 (phosphorylation); GO:0035556 (intracellular signal transduction); GO:0005929 (cilium); GO:0042073 (intraciliary transport); GO:0060271 (cilium assembly)	-1.6941	-2.54741	0.0108527	0.205302
WBGene00001864	183932		him-5	High Incidence of Males (Increased X chromosome loss)	protein_coding	GO:0045132 (meiotic chromosome segregation); GO:0003674 (molecular_function); GO:0000793 (condensed chromosome); GO:0010780 (meiotic DNA double-strand break formation involved in reciprocal meiotic recombination)	-2.18837	-2.54696	0.0108666	0.205302
WBGene00012796	176737	89782	Y43F4A.1	Leishmanolysin-like peptidase	protein_coding	GO:0005737 (cytoplasm); GO:0016020 (membrane); GO:0016787 (hydrolase activity); GO:0046872 (metal ion binding); GO:0004222 (metalloendopeptidase activity); GO:0006508 (proteolysis); GO:0008233 (peptidase activity); GO:0008237 (metallopeptidase activity); GO:0007155 (cell adhesion); GO:0007049 (cell cycle); GO:0051301 (cell division)	1.77458	2.54723	0.0108583	0.205302
WBGene00016947	183846		C55B7.11		protein_coding		-2.03998	-2.54402	0.0109584	0.206529
WBGene00019712	172212		rmh-1	RMi1 (RMI1) Homolog	protein_coding	GO:0000166 (nucleotide binding); GO:0000724 (double-strand break repair via homologous recombination); GO:0000712 (resolution of meiotic recombination intermediates); GO:0016604 (nuclear body); GO:0031422 (RecQ family helicase-topoisomerase III complex)	-2.01666	-2.54423	0.0109519	0.206529
WBGene00007073	179450		ugt-2	UDP-GlucuronosylTransferase	protein_coding	GO:0016020 (membrane); GO:0016021 (integral component of membrane); GO:0016740 (transferase activity); GO:0043231 (intracellular membrane-bounded organelle); GO:0015020 (glucuronosyltransferase activity); GO:0016757 (transferase activity, transferring glycosyl groups); GO:0008194 (UDP-glycosyltransferase activity)	2.08243	2.54415	0.0109544	0.206529
WBGene00016530	183336		C39D10.2		protein_coding		1.98219	2.54296	0.0109916	0.20665
WBGene00000597	175981		col-8	Cuticle collagen 8	protein_coding	GO:0042302 (structural constituent of cuticle)	1.83075	2.54301	0.0109903	0.20665
WBGene00013784	190992		Y116A8C.3		protein_coding		-1.80253	-2.54315	0.0109859	0.20665
WBGene00004810	191762		skr-4	SKp1 Related (Ubiquitin ligase complex component)	protein_coding	GO:0005634 (nucleus); GO:0005737 (cytoplasm); GO:0006511 (ubiquitin-dependent protein catabolic process); GO:0016567 (protein ubiquitination); GO:0031146 (SCF-dependent proteasomal ubiquitin-dependent protein catabolic process); GO:0097602 (cullin family protein binding)	-1.6964	-2.54087	0.0110578	0.207725
WBGene00001577	178108	57699	gem-4	Gon-2 Extragenic Modifier	protein_coding	GO:0005886 (plasma membrane); GO:0005544 (calcium-dependent phospholipid binding); GO:0071277 (cellular response to calcium ion)	-1.59925	-2.5397	0.0110946	0.208078
WBGene00010907	175594		M88.4		protein_coding		1.90135	2.53985	0.0110899	0.208078
WBGene00007302	182228	11072	C04F12.8		protein_coding	GO:0016787 (hydrolase activity); GO:0004725 (protein tyrosine phosphatase activity); GO:0006470 (protein dephosphorylation); GO:0035335 (peptidyl-tyrosine dephosphorylation); GO:0004721 (phosphoprotein phosphatase activity); GO:0016311 (dephosphorylation); GO:0016791 (phosphatase activity); GO:0008138 (protein tyrosine/serine/threonine phosphatase activity); GO:0005863 (striated muscle myosin thi…	1.65875	2.53803	0.0111477	0.208613
WBGene00015915	173947	55239	C17G10.1		protein_coding	GO:0005737 (cytoplasm); GO:0046872 (metal ion binding); GO:0016491 (oxidoreductase activity); GO:0051213 (dioxygenase activity); GO:0005506 (iron ion binding); GO:0016705 (oxidoreductase activity, acting on paired donors, with incorporation or reduction of molecular oxygen); GO:0031418 (L-ascorbic acid binding); GO:0006449 (regulation of translational termination); GO:0016706 (2-oxoglutarate-depe…	-1.73323	-2.53796	0.0111502	0.208613
WBGene00010944	174497		M176.5		protein_coding		1.66172	2.53797	0.0111496	0.208613
WBGene00017269	176046		F08F8.4		protein_coding	GO:0005634 (nucleus); GO:0046872 (metal ion binding); GO:0016740 (transferase activity); GO:0016746 (transferase activity, transferring acyl groups); GO:0007049 (cell cycle); GO:0007062 (sister chromatid cohesion); GO:0000070 (mitotic sister chromatid segregation); GO:0006275 (regulation of DNA replication); GO:0016407 (acetyltransferase activity); GO:0045132 (meiotic chromosome segregation); GO:…	-1.6809	-2.53711	0.011177	0.208777
WBGene00008538	178374	58472	sqrd-1	Sulfide Quinone oxidoReDuctase	protein_coding	GO:0005739 (mitochondrion); GO:0070221 (sulfide oxidation, using sulfide:quinone oxidoreductase); GO:0070224 (sulfide:quinone oxidoreductase activity); GO:0071949 (FAD binding); GO:0016491 (oxidoreductase activity); GO:0055114 (oxidation-reduction process)	-1.80713	-2.53729	0.0111715	0.208777
WBGene00000603	177559		col-14	Cuticle collagen 14	protein_coding	GO:0042302 (structural constituent of cuticle); GO:0016020 (membrane); GO:0016021 (integral component of membrane)	1.85577	2.53402	0.0112762	0.209963
WBGene00008841	174887		F15A4.6		protein_coding		2.38089	2.53438	0.0112646	0.209963
WBGene00018418	176243		F44E2.4		protein_coding	GO:0016020 (membrane); GO:0016021 (integral component of membrane); GO:0005515 (protein binding)	1.87746	2.534	0.0112769	0.209963
WBGene00001865	178201		him-6	Bloom syndrome protein homolog	protein_coding	GO:0043138 (3'-5' DNA helicase activity); GO:0004386 (helicase activity); GO:0006310 (DNA recombination); GO:0006281 (DNA repair); GO:0000166 (nucleotide binding); GO:0006260 (DNA replication); GO:0044237 (cellular metabolic process); GO:0003676 (nucleic acid binding); GO:0005524 (ATP binding)	-1.74425	-2.53473	0.0112535	0.209963
WBGene00010558	177898		ptp-4	Tyrosine-protein phosphatase 4	protein_coding	GO:0016311 (dephosphorylation); GO:0006470 (protein dephosphorylation); GO:0004725 (protein tyrosine phosphatase activity); GO:0016791 (phosphatase activity); GO:0005515 (protein binding)	1.74658	2.53213	0.0113372	0.210917
WBGene00019792	177642		M116.5		protein_coding	GO:0042995 (cell projection); GO:0008017 (microtubule binding); GO:0003779 (actin binding); GO:0005515 (protein binding)	-2.10181	-2.53137	0.0113618	0.211203
WBGene00016658	180878		C45B2.1		protein_coding		2.06572	2.52891	0.0114418	0.212439
WBGene00009529	185449		F38B2.2		protein_coding		2.73488	2.52876	0.0114467	0.212439
WBGene00020160	180569		igcm-3	ImmunoGlobulin-like Cell adhesion Molecule family	protein_coding	GO:0016020 (membrane); GO:0016021 (integral component of membrane); GO:0098609 (cell-cell adhesion); GO:0005887 (integral component of plasma membrane); GO:0050839 (cell adhesion molecule binding); GO:0005911 (cell-cell junction)	1.61353	2.52832	0.0114609	0.212532
WBGene00004773	172435		sem-4	SEM-4 long form	protein_coding	GO:0005634 (nucleus); GO:0000978 (RNA polymerase II cis-regulatory region sequence-specific DNA binding); GO:0000981 (DNA-binding transcription factor activity, RNA polymerase II-specific); GO:0006357 (regulation of transcription by RNA polymerase II); GO:0000977 (RNA polymerase II transcription regulatory region sequence-specific DNA binding); GO:0005515 (protein binding); GO:0000122 (negative r…	1.68359	2.52741	0.0114906	0.212913
WBGene00008579	184202		F08G2.8		protein_coding		2.25341	2.52683	0.0115097	0.213095
WBGene00020887	189029		hic-1		protein_coding	GO:0016020 (membrane); GO:0016021 (integral component of membrane)	1.84133	2.5258	0.0115435	0.213549
WBGene00017643	177587	9183	czw-1	Centromere/kinetochore protein zw10 homolog	protein_coding	GO:0005737 (cytoplasm); GO:0005634 (nucleus); GO:0005856 (cytoskeleton); GO:0005515 (protein binding); GO:0006888 (endoplasmic reticulum to Golgi vesicle-mediated transport); GO:0007049 (cell cycle); GO:0051301 (cell division); GO:0005694 (chromosome); GO:0000775 (chromosome, centromeric region); GO:0000776 (kinetochore); GO:0000777 (condensed chromosome kinetochore); GO:0007059 (chromosome segre…	-1.63036	-2.52488	0.0115736	0.213765
WBGene00003769	178804		nlp-31	Neuropeptide-like protein 31 QWGYGGY-amide GYGGYGGY-amide GYGGY-amide GMYGGY-amide PYGGYGW-amide	protein_coding		1.87818	2.52494	0.0115717	0.213765
WBGene00008840	174886		F15A4.5		protein_coding	GO:0016020 (membrane); GO:0016021 (integral component of membrane)	2.48095	2.52369	0.0116131	0.213981
WBGene00020326	188249		math-38	MATH (Meprin-associated Traf homology) domain containing	protein_coding	GO:0050830 (defense response to Gram-positive bacterium); GO:0005515 (protein binding)	-1.89977	-2.5241	0.0115996	0.213981
WBGene00044489	3896803		pudl-1	PUD-Like protein	protein_coding		2.7099	2.52388	0.0116067	0.213981
WBGene00007138	175563	64849	B0285.6	Uncharacterized transporter B0285.6	protein_coding	GO:0016020 (membrane); GO:0016021 (integral component of membrane); GO:0022857 (transmembrane transporter activity); GO:0055085 (transmembrane transport); GO:0015141 (succinate transmembrane transporter activity); GO:0071422 (succinate transmembrane transport); GO:0015137 (citrate transmembrane transporter activity); GO:0015746 (citrate transport); GO:0098656 (anion transmembrane transport)	4.11343	2.52311	0.0116322	0.213997
WBGene00021039	189218		W05F2.7		protein_coding		1.90207	2.5231	0.0116325	0.213997
WBGene00017964	185179		F31F7.1		protein_coding	GO:0016740 (transferase activity); GO:0008080 (N-acetyltransferase activity); GO:0045087 (innate immune response)	-1.59017	-2.52232	0.0116583	0.214302
WBGene00195176	13218536		Y43F8B.24		protein_coding		-2.15694	-2.52091	0.0117051	0.214991
WBGene00000722	179431		col-149	COLlagen	protein_coding	GO:0016020 (membrane); GO:0016021 (integral component of membrane); GO:0042302 (structural constituent of cuticle)	3.12957	2.51963	0.0117477	0.215518
WBGene00012114	189032		T28B8.3		protein_coding	GO:0010952 (positive regulation of peptidase activity); GO:0016504 (peptidase activator activity); GO:0005634 (nucleus); GO:0005829 (cytosol); GO:0006281 (DNA repair); GO:0006974 (cellular response to DNA damage stimulus); GO:0010499 (proteasomal ubiquitin-independent protein catabolic process); GO:0070577 (lysine-acetylated histone binding); GO:0070628 (proteasome binding)	3.89273	2.51949	0.0117525	0.215518
WBGene00000425	176288		ced-11		protein_coding		1.86157	2.51569	0.0118801	0.217512
WBGene00006064	180802	2040	sto-2	Stomatin-2	protein_coding	GO:0016020 (membrane); GO:0016021 (integral component of membrane); GO:0005886 (plasma membrane)	2.16566	2.51574	0.0118784	0.217512
WBGene00008415	172514	84693	mce-1	Methylmalonyl-CoA Epimerase; Mitochondrial methylmalonyl-CoA epimerase	protein_coding	GO:0004493 (methylmalonyl-CoA epimerase activity); GO:0046491 (L-methylmalonyl-CoA metabolic process); GO:0005739 (mitochondrion)	-1.61516	-2.51474	0.0119119	0.217826
WBGene00003815	172442	4677	nars-1	Asparagine--tRNA ligase, cytoplasmic	protein_coding	GO:0005524 (ATP binding); GO:0000166 (nucleotide binding); GO:0004812 (aminoacyl-tRNA ligase activity); GO:0006418 (tRNA aminoacylation for protein translation); GO:0016874 (ligase activity); GO:0005737 (cytoplasm); GO:0006412 (translation); GO:0003676 (nucleic acid binding); GO:0004816 (asparagine-tRNA ligase activity); GO:0006421 (asparaginyl-tRNA aminoacylation)	-1.6222	-2.51462	0.0119161	0.217826
WBGene00003664	191723		nhr-74	Nuclear Hormone Receptor family	protein_coding	GO:0005634 (nucleus); GO:0046872 (metal ion binding); GO:0003700 (DNA-binding transcription factor activity); GO:0006355 (regulation of transcription, DNA-templated); GO:0008270 (zinc ion binding); GO:0043565 (sequence-specific DNA binding); GO:0003677 (DNA binding)	4.57211	2.51368	0.011948	0.218238
WBGene00012672	180258		Y39B6A.10		protein_coding	GO:0016020 (membrane); GO:0016021 (integral component of membrane)	-1.81612	-2.51145	0.0120236	0.219446
WBGene00000528	174821		clh-1	Chloride channel protein	protein_coding	GO:0016020 (membrane); GO:0016021 (integral component of membrane); GO:0006811 (ion transport); GO:0034220 (ion transmembrane transport); GO:0055085 (transmembrane transport); GO:0005887 (integral component of plasma membrane); GO:0005247 (voltage-gated chloride channel activity); GO:0006821 (chloride transport)	1.65023	2.51011	0.0120695	0.219692
WBGene00001449	179327		flp-6	FMRFamide-like neuropeptides 6 QQDSEVEREMM KSAYMRF-amide 1 KSAYMRF-amide 2 KSAYMRF-amide 3 KSAYMRF-amide 4 KSAYMRF-amide 5 KSAYMRF-amide 6	protein_coding	GO:0007218 (neuropeptide signaling pathway)	1.59149	2.50994	0.0120752	0.219692
WBGene00020700	178782		T22F3.11		protein_coding	GO:0016020 (membrane); GO:0016021 (integral component of membrane); GO:0022857 (transmembrane transporter activity); GO:0055085 (transmembrane transport)	-2.00678	-2.50995	0.0120748	0.219692
WBGene00021274	189526		Y23H5B.3		protein_coding		2.82003	2.51057	0.0120536	0.219692
WBGene00022076	3565775	8528	daao-1	D-amino-acid oxidase	protein_coding	GO:0046416 (D-amino acid metabolic process); GO:0003884 (D-amino-acid oxidase activity); GO:0071949 (FAD binding); GO:0016491 (oxidoreductase activity); GO:0055114 (oxidation-reduction process)	-1.8763	-2.50965	0.0120851	0.219699
WBGene00008603	184221		F09B9.4		protein_coding		-1.7151	-2.50913	0.0121028	0.219824
WBGene00002053	173976	84823	ifb-1	Intermediate filament protein ifb-1	protein_coding		1.61279	2.50889	0.012111	0.219824
WBGene00021873	177064		clec-82	C-type LECtin	protein_coding	GO:0030246 (carbohydrate binding); GO:0050830 (defense response to Gram-positive bacterium)	-1.98845	-2.50839	0.0121282	0.219876
WBGene00022113	171855		Y71F9AL.8		protein_coding		-2.26291	-2.50826	0.0121329	0.219876
WBGene00000906	184883	55764	daf-10	Intraflagellar transport protein 122 homolog	protein_coding	GO:0060271 (cilium assembly); GO:0005515 (protein binding)	2.29319	2.507	0.0121759	0.220483
WBGene00017616	179086		F20A1.4		protein_coding	GO:0016020 (membrane); GO:0016021 (integral component of membrane)	3.97704	2.50672	0.0121858	0.22049
WBGene00001401	174016		fbf-1	Fem-3 mRNA-binding factor 1	protein_coding	GO:0003723 (RNA binding)	-2.52357	-2.50473	0.0122545	0.221212
WBGene00004218	173426		ptr-3	PaTched Related family	protein_coding	GO:0016020 (membrane); GO:0016021 (integral component of membrane); GO:0005886 (plasma membrane); GO:0030659 (cytoplasmic vesicle membrane); GO:0006897 (endocytosis); GO:0018996 (molting cycle, collagen and cuticulin-based cuticle); GO:0045138 (nematode male tail tip morphogenesis)	1.92912	2.5051	0.0122418	0.221212
WBGene00020094	175681		wip-1	Wiskott-Aldrich syndrome protein (WASP)-Interacting Protein and gene assignment	protein_coding	GO:0003779 (actin binding); GO:0010172 (embryonic body morphogenesis); GO:0030334 (regulation of cell migration); GO:0005519 (cytoskeletal regulatory protein binding); GO:0031647 (regulation of protein stability)	-1.62048	-2.50474	0.0122542	0.221212
WBGene00013610	180130		fbxa-206	F-box A protein	protein_coding	GO:0005515 (protein binding)	-1.99125	-2.50435	0.0122676	0.221234
WBGene00007358	182288		lact-6	Beta-LACTamase domain containing	protein_coding		3.98211	2.50414	0.0122748	0.221234
WBGene00002247	177292	3913	lam-1	LAMinin related. See also lmb	protein_coding	GO:0016020 (membrane); GO:0009888 (tissue development); GO:0016477 (cell migration); GO:0005604 (basement membrane); GO:0034446 (substrate adhesion-dependent cell spreading); GO:0040017 (positive regulation of locomotion); GO:0060465 (pharynx development); GO:0009887 (animal organ morphogenesis); GO:0070831 (basement membrane assembly); GO:0043256 (laminin complex)	1.57588	2.50112	0.0123802	0.22296
WBGene00003185	181004	5609	mek-1	Dual specificity mitogen-activated protein kinase kinase mek-1	protein_coding	GO:0004672 (protein kinase activity); GO:0006468 (protein phosphorylation); GO:0005524 (ATP binding)	-1.59267	-2.49851	0.0124717	0.224433
WBGene00235316	24104107		B0222.15		protein_coding	GO:0016020 (membrane); GO:0016021 (integral component of membrane)	3.16632	2.49576	0.0125687	0.224821
WBGene00015948	182760		C18A11.2		protein_coding		2.14452	2.49651	0.0125423	0.224821
WBGene00016182	177653		C28C12.12		protein_coding		-1.71646	-2.49569	0.0125711	0.224821
WBGene00010179	186430		F57A8.4		protein_coding	GO:0016020 (membrane); GO:0016021 (integral component of membrane); GO:0004930 (G protein-coupled receptor activity); GO:0007186 (G protein-coupled receptor signaling pathway)	1.97338	2.49641	0.0125459	0.224821
WBGene00014164	174570		lact-2	Beta-lactamase domain-containing protein 2	protein_coding		-1.75399	-2.4959	0.0125638	0.224821
WBGene00004422	178778	6135	rpl-11.1	60S ribosomal protein L11-1	protein_coding	GO:0005634 (nucleus); GO:0005737 (cytoplasm); GO:0003723 (RNA binding); GO:0003735 (structural constituent of ribosome); GO:0005840 (ribosome); GO:0006412 (translation); GO:0022625 (cytosolic large ribosomal subunit); GO:0019843 (rRNA binding)	-1.67459	-2.49667	0.0125364	0.224821
WBGene00006444	174739		shn-1		protein_coding	GO:0031410 (cytoplasmic vesicle); GO:0035255 (ionotropic glutamate receptor binding); GO:0008328 (ionotropic glutamate receptor complex); GO:0030054 (cell junction); GO:0045202 (synapse); GO:0005515 (protein binding); GO:0042995 (cell projection); GO:0045211 (postsynaptic membrane); GO:0014069 (postsynaptic density); GO:0031143 (pseudopodium); GO:0043197 (dendritic spine); GO:0051968 (positive re…	1.63534	2.49616	0.0125546	0.224821
WBGene00020218	180424		T04G9.7		protein_coding		-1.85334	-2.49616	0.0125544	0.224821
WBGene00019803	181016		PDB1.1		protein_coding	GO:0016020 (membrane); GO:0016021 (integral component of membrane); GO:0098655 (cation transmembrane transport); GO:0055085 (transmembrane transport); GO:0006812 (cation transport); GO:0008324 (cation transmembrane transporter activity); GO:0006829 (zinc ion transport); GO:0045087 (innate immune response)	-1.67253	-2.49323	0.0126587	0.225948
WBGene00011433	173200	5137	pde-1	Probable 3',5'-cyclic phosphodiesterase pde-1	protein_coding	GO:0008081 (phosphoric diester hydrolase activity); GO:0004114 (3',5'-cyclic-nucleotide phosphodiesterase activity); GO:0007165 (signal transduction); GO:0016787 (hydrolase activity); GO:0046872 (metal ion binding); GO:0005516 (calmodulin binding)	1.82519	2.49344	0.0126511	0.225948
WBGene00014213	181689		ZK1073.1		protein_coding		-1.56087	-2.4931	0.0126635	0.225948
WBGene00001694	179244		grd-5	GRounDhog (Hedgehog-like family)	protein_coding	GO:0009792 (embryo development ending in birth or egg hatching); GO:0005102 (signaling receptor binding); GO:0005576 (extracellular region); GO:0007154 (cell communication)	2.03743	2.49195	0.0127045	0.226505
WBGene00008591	184214		F08H9.3		protein_coding		2.49154	2.49147	0.0127217	0.226636
WBGene00013782	190990		npr-32	NeuroPeptide Receptor family	protein_coding	GO:0016020 (membrane); GO:0016021 (integral component of membrane); GO:0004930 (G protein-coupled receptor activity); GO:0007165 (signal transduction); GO:0007186 (G protein-coupled receptor signaling pathway)	3.09126	2.48912	0.012806	0.227787
WBGene00006614	176202	7225	trp-1	Transient-receptor-potential-like protein	protein_coding	GO:0016020 (membrane); GO:0016021 (integral component of membrane); GO:0005216 (ion channel activity); GO:0006811 (ion transport); GO:0055085 (transmembrane transport); GO:0005887 (integral component of plasma membrane); GO:0070588 (calcium ion transmembrane transport); GO:0005262 (calcium channel activity); GO:0051480 (regulation of cytosolic calcium ion concentration); GO:0006828 (manganese ion…	1.83294	2.48937	0.012797	0.227787
WBGene00021093	173450		W08F4.3		protein_coding	GO:0016020 (membrane); GO:0016021 (integral component of membrane); GO:0005783 (endoplasmic reticulum); GO:0005789 (endoplasmic reticulum membrane); GO:0005635 (nuclear envelope); GO:0005637 (nuclear inner membrane); GO:0005640 (nuclear outer membrane)	-1.61826	-2.48768	0.0128579	0.228535
WBGene00015613	173549		C08F1.10		protein_coding	GO:0016020 (membrane); GO:0016021 (integral component of membrane)	1.76737	2.48668	0.012894	0.228815
WBGene00015887	173942	10005	C17C3.1		protein_coding	GO:0016787 (hydrolase activity); GO:0005782 (peroxisomal matrix); GO:0006637 (acyl-CoA metabolic process); GO:0009062 (fatty acid catabolic process); GO:0047617 (acyl-CoA hydrolase activity); GO:0016020 (membrane); GO:0016021 (integral component of membrane)	1.7237	2.48615	0.0129133	0.228815
WBGene00000883	180027		cyn-7	Peptidyl-prolyl cis-trans isomerase 7	protein_coding	GO:0000413 (protein peptidyl-prolyl isomerization); GO:0006457 (protein folding); GO:0003755 (peptidyl-prolyl cis-trans isomerase activity)	-1.57422	-2.48642	0.0129037	0.228815
WBGene00021553	189907		tyr-5	TYRosinase	protein_coding	GO:0016491 (oxidoreductase activity)	1.85264	2.48662	0.0128964	0.228815
WBGene00018732	186147		F53A9.9		protein_coding		1.73778	2.48549	0.0129373	0.229065
WBGene00006582	179216		tmd-2	TropoMoDulin	protein_coding	GO:0005856 (cytoskeleton); GO:0007015 (actin filament organization); GO:0005523 (tropomyosin binding); GO:0030016 (myofibril); GO:0030239 (myofibril assembly); GO:0051694 (pointed-end actin filament capping)	1.66967	2.48423	0.0129831	0.2297
WBGene00000216	180947		asp-3	Aspartic protease 3	protein_coding	GO:0004190 (aspartic-type endopeptidase activity); GO:0006508 (proteolysis)	-1.55566	-2.48361	0.0130057	0.229924
WBGene00008558	184164		F07H5.7		protein_coding	GO:0016020 (membrane); GO:0016021 (integral component of membrane)	2.17749	2.47844	0.0131959	0.232781
WBGene00019188	180495		H11E01.3		protein_coding		1.63194	2.47812	0.0132077	0.232781
WBGene00021467	171789	80227	Y39G10AR.9		protein_coding	GO:0005515 (protein binding)	-1.6488	-2.4783	0.0132008	0.232781
WBGene00013173	175164		Y53F4B.27		protein_coding		5.54912	2.4789	0.0131788	0.232781
WBGene00003591	183294		nex-4	AnNEXin family	protein_coding	GO:0005509 (calcium ion binding); GO:0005544 (calcium-dependent phospholipid binding); GO:0005737 (cytoplasm); GO:0001786 (phosphatidylserine binding); GO:0005545 (1-phosphatidylinositol binding); GO:0008201 (heparin binding); GO:0008429 (phosphatidylethanolamine binding)	2.92611	2.47604	0.0132848	0.233606
WBGene00018479	185807		otpl-6	OToPetrin-Like	protein_coding	GO:0016020 (membrane); GO:0016021 (integral component of membrane); GO:0005886 (plasma membrane); GO:0006811 (ion transport)	4.51718	2.47577	0.0132949	0.233606
WBGene00005019	177631	80146	sqv-1	SQuashed Vulva	protein_coding	GO:0005737 (cytoplasm); GO:0016829 (lyase activity); GO:0070403 (NAD+ binding); GO:0016831 (carboxy-lyase activity); GO:0048040 (UDP-glucuronate decarboxylase activity); GO:0009792 (embryo development ending in birth or egg hatching); GO:0018991 (oviposition); GO:0000003 (reproduction); GO:0040025 (vulval development); GO:0060465 (pharynx development); GO:0002009 (morphogenesis of an epithelium);…	-1.60182	-2.47606	0.0132841	0.233606
WBGene00006924	173512		vig-1	VIG (Drosophila Vasa Intronic Gene) ortholog	protein_coding	GO:0005634 (nucleus); GO:0005737 (cytoplasm); GO:0003723 (RNA binding); GO:0016442 (RISC complex)	-1.55398	-2.47622	0.0132782	0.233606
WBGene00003912	175638		pal-1	Homeobox protein pal-1	protein_coding	GO:0000981 (DNA-binding transcription factor activity, RNA polymerase II-specific); GO:0006355 (regulation of transcription, DNA-templated); GO:0003677 (DNA binding)	-1.67832	-2.47526	0.013314	0.233764
WBGene00018641	186045		F49E10.4		protein_coding	GO:0035694 (mitochondrial protein catabolic process); GO:0005741 (mitochondrial outer membrane)	1.98464	2.47478	0.0133319	0.233901
WBGene00015786	180920		C15B12.4		protein_coding		1.90172	2.47126	0.0134637	0.235854
WBGene00003879	191739		ora-1	Onchocerca Related Antigen family	protein_coding		4.28058	2.47138	0.0134594	0.235854
WBGene00014124	179670		usip-1	U Six snRNA Interacting Protein	protein_coding	GO:0005634 (nucleus); GO:0046872 (metal ion binding); GO:0016740 (transferase activity); GO:0016779 (nucleotidyltransferase activity); GO:0005654 (nucleoplasm); GO:0031123 (RNA 3'-end processing); GO:0050265 (RNA uridylyltransferase activity); GO:0034477 (U6 snRNA 3'-end processing); GO:0071076 (RNA 3' uridylation)	-1.60178	-2.47038	0.0134968	0.236256
WBGene00000206	175605		asb-1	ATP Synthase B homolog	protein_coding	GO:0016020 (membrane); GO:0006811 (ion transport); GO:0005739 (mitochondrion); GO:0005743 (mitochondrial inner membrane); GO:0015078 (proton transmembrane transporter activity); GO:0015986 (ATP synthesis coupled proton transport); GO:0000276 (mitochondrial proton-transporting ATP synthase complex, coupling factor F(o)); GO:0097730 (non-motile cilium)	-1.59987	-2.46804	0.0135857	0.236659
WBGene00018483	185810		F45F2.11		protein_coding		-1.72716	-2.46792	0.01359	0.236659
WBGene00019300	186875	55974	swt-1	Sugar transporter SWEET1	protein_coding	GO:0016020 (membrane); GO:0016021 (integral component of membrane); GO:0005886 (plasma membrane); GO:0000139 (Golgi membrane); GO:0005794 (Golgi apparatus); GO:0008643 (carbohydrate transport); GO:0034219 (carbohydrate transmembrane transport); GO:0051119 (sugar transmembrane transporter activity)	-1.63836	-2.46822	0.0135787	0.236659
WBGene00011371	187984		T02D1.4		protein_coding	GO:0016020 (membrane); GO:0016021 (integral component of membrane)	2.87644	2.46866	0.0135619	0.236659
WBGene00013340	180167		tcc-1	Transmembrane and Coiled-Coil protein	protein_coding	GO:0016020 (membrane); GO:0016021 (integral component of membrane); GO:0019894 (kinesin binding); GO:0005789 (endoplasmic reticulum membrane); GO:0051653 (spindle localization)	-1.56427	-2.46855	0.013566	0.236659
WBGene00011452	188072		ugt-55	Putative UDP-glucuronosyltransferase ugt-55	protein_coding	GO:0016020 (membrane); GO:0016021 (integral component of membrane); GO:0016740 (transferase activity); GO:0043231 (intracellular membrane-bounded organelle); GO:0015020 (glucuronosyltransferase activity); GO:0016757 (transferase activity, transferring glycosyl groups); GO:0008194 (UDP-glycosyltransferase activity)	2.12703	2.46901	0.0135487	0.236659
WBGene00013941	191247		ZK218.7		protein_coding		67.4999	2.46788	0.0135915	0.236659
WBGene00018286	179241	54363	F41E6.5		protein_coding	GO:0003824 (catalytic activity); GO:0016491 (oxidoreductase activity); GO:0010181 (FMN binding); GO:0055114 (oxidation-reduction process)	-1.63228	-2.46263	0.0137921	0.239853
WBGene00013996	191349	256471	ZK550.2		protein_coding	GO:0016020 (membrane); GO:0016021 (integral component of membrane); GO:0022857 (transmembrane transporter activity); GO:0055085 (transmembrane transport)	-2.25973	-2.46254	0.0137958	0.239853
WBGene00015843	182672		C16C8.5		protein_coding	GO:0005515 (protein binding)	-2.61988	-2.46163	0.0138308	0.240061
WBGene00000417	178272		ced-3	Cell death protein 3 Cell death protein 3 subunit p17 Cell death protein 3 subunit p15 Cell death protein 3 subunit p13	protein_coding	GO:0042981 (regulation of apoptotic process); GO:0004197 (cysteine-type endopeptidase activity); GO:0008234 (cysteine-type peptidase activity); GO:0006508 (proteolysis); GO:0016787 (hydrolase activity); GO:0008233 (peptidase activity); GO:0009792 (embryo development ending in birth or egg hatching); GO:0005737 (cytoplasm); GO:0048471 (perinuclear region of cytoplasm); GO:0006915 (apoptotic proces…	-1.67048	-2.46142	0.0138389	0.240061
WBGene00010308	176272	51005	F59B2.3	N-acetylglucosamine-6-phosphate deacetylase	protein_coding	GO:0016787 (hydrolase activity); GO:0046872 (metal ion binding); GO:0005975 (carbohydrate metabolic process); GO:0016810 (hydrolase activity, acting on carbon-nitrogen (but not peptide) bonds); GO:0006044 (N-acetylglucosamine metabolic process); GO:0006046 (N-acetylglucosamine catabolic process); GO:0008448 (N-acetylglucosamine-6-phosphate deacetylase activity); GO:0047419 (N-acetylgalactosamine-…	-1.6326	-2.46163	0.0138309	0.240061
WBGene00077775	7040141		nlp-58	Neuropeptide-Like Protein	protein_coding	GO:0007218 (neuropeptide signaling pathway)	1.7894	2.45937	0.0139181	0.241254
WBGene00000453	179603		ceh-32	Homeobox protein ceh-32	protein_coding	GO:0003677 (DNA binding)	1.67338	2.45876	0.0139416	0.241481
WBGene00001616	179251	2897	glr-5	GLutamate Receptor family (AMPA)	protein_coding	GO:0016020 (membrane); GO:0016021 (integral component of membrane); GO:0038023 (signaling receptor activity); GO:0005216 (ion channel activity); GO:0005886 (plasma membrane); GO:0006811 (ion transport); GO:0034220 (ion transmembrane transport); GO:0008066 (glutamate receptor activity); GO:0030054 (cell junction); GO:0045202 (synapse); GO:0045211 (postsynaptic membrane); GO:0060078 (regulation of …	1.73067	2.45665	0.014024	0.242583
WBGene00019489	24104726		K07E1.1	1,2-dihydroxy-3-keto-5-methylthiopentene dioxygenase homolog 2	protein_coding	GO:0005634 (nucleus); GO:0005737 (cytoplasm); GO:0016491 (oxidoreductase activity); GO:0010309 (acireductone dioxygenase [iron(II)-requiring] activity); GO:0051213 (dioxygenase activity); GO:0008652 (cellular amino acid biosynthetic process); GO:0006555 (methionine metabolic process); GO:0009086 (methionine biosynthetic process); GO:0016702 (oxidoreductase activity, acting on single donors with i…	1.65739	2.45659	0.0140263	0.242583
WBGene00013008	175004		clec-146	C-type LECtin	protein_coding	GO:0030246 (carbohydrate binding)	1.73656	2.45548	0.0140695	0.243148
WBGene00009925	178364	5373	F52B11.2	Probable phosphomannomutase	protein_coding	GO:0046872 (metal ion binding); GO:0005737 (cytoplasm); GO:0005829 (cytosol); GO:0016853 (isomerase activity); GO:0006487 (protein N-linked glycosylation); GO:0009298 (GDP-mannose biosynthetic process); GO:0006013 (mannose metabolic process); GO:0004615 (phosphomannomutase activity)	-1.6914	-2.4551	0.0140845	0.243227
WBGene00003623	181432		nhr-25	Nuclear hormone receptor family member nhr-25	protein_coding	GO:0004879 (nuclear receptor activity); GO:0043565 (sequence-specific DNA binding); GO:0003700 (DNA-binding transcription factor activity); GO:0008270 (zinc ion binding); GO:0006355 (regulation of transcription, DNA-templated); GO:0003677 (DNA binding)	1.79314	2.45305	0.0141651	0.244434
WBGene00045208	4927023		F13E9.15		protein_coding		1.9517	2.45132	0.0142334	0.245065
WBGene00045385	6418837		lgc-24	Ligand-Gated ion Channel	protein_coding	GO:0016020 (membrane); GO:0016021 (integral component of membrane); GO:0004888 (transmembrane signaling receptor activity); GO:0005216 (ion channel activity); GO:0005230 (extracellular ligand-gated ion channel activity); GO:0006811 (ion transport); GO:0034220 (ion transmembrane transport); GO:0042391 (regulation of membrane potential); GO:0007268 (chemical synaptic transmission); GO:0043005 (neur…	-1.85676	-2.45183	0.0142133	0.245065
WBGene00013394	181365		ule-5	Uterine Lumin Expressed/locailized	protein_coding		-1.64691	-2.45135	0.0142323	0.245065
WBGene00007067	181797	84766	4R79.2		protein_coding	GO:0005525 (GTP binding); GO:0003924 (GTPase activity)	1.88845	2.45105	0.0142442	0.245068
WBGene00003887	176790		osm-7		protein_coding	GO:0005615 (extracellular space); GO:0005112 (Notch binding); GO:0045747 (positive regulation of Notch signaling pathway); GO:0006970 (response to osmotic stress)	1.82193	2.45053	0.0142646	0.245237
WBGene00006641	192065		tsp-15	Tetraspanin-15	protein_coding	GO:0016020 (membrane); GO:0016021 (integral component of membrane); GO:0005887 (integral component of plasma membrane); GO:0042338 (cuticle development involved in collagen and cuticulin-based cuticle molting cycle); GO:0098773 (skin epidermis development)	1.67091	2.44827	0.0143545	0.246598
WBGene00003939	185022		pax-3	PAX (Paired box) transcription factor	protein_coding	GO:0003677 (DNA binding); GO:0005634 (nucleus); GO:0006355 (regulation of transcription, DNA-templated); GO:0005515 (protein binding); GO:0000978 (RNA polymerase II cis-regulatory region sequence-specific DNA binding); GO:0000981 (DNA-binding transcription factor activity, RNA polymerase II-specific); GO:0006357 (regulation of transcription by RNA polymerase II); GO:0048856 (anatomical structure …	1.99472	2.4474	0.0143891	0.246938
WBGene00021721	173694		Y49F6B.9	RBR-type E3 ubiquitin transferase	protein_coding	GO:0016020 (membrane); GO:0016021 (integral component of membrane); GO:0005737 (cytoplasm); GO:0046872 (metal ion binding); GO:0016740 (transferase activity); GO:0000209 (protein polyubiquitination); GO:0004842 (ubiquitin-protein transferase activity); GO:0006511 (ubiquitin-dependent protein catabolic process); GO:0061630 (ubiquitin protein ligase activity); GO:0016567 (protein ubiquitination); G…	-1.86892	-2.44724	0.0143956	0.246938
WBGene00015975	266829	10487	cas-2	Adenylyl cyclase-associated protein	protein_coding	GO:0005737 (cytoplasm); GO:0003779 (actin binding); GO:0000902 (cell morphogenesis); GO:0007010 (cytoskeleton organization); GO:0008179 (adenylate cyclase binding); GO:0045761 (regulation of adenylate cyclase activity); GO:0019933 (cAMP-mediated signaling)	-1.68656	-2.44551	0.0144647	0.247938
WBGene00008301	183784		pals-39	Protein containing ALS2cr12 (ALS2CR12) signature	protein_coding		-3.42012	-2.44515	0.0144792	0.248003
WBGene00012536	189599		Y37A1A.3		protein_coding	GO:0016020 (membrane); GO:0016021 (integral component of membrane); GO:0022857 (transmembrane transporter activity); GO:0055085 (transmembrane transport)	1.67234	2.44316	0.0145591	0.249188
WBGene00007445	178023		C08F8.3		protein_coding		-1.70638	-2.44162	0.0146216	0.250072
WBGene00002263	3564838		lea-1	Plant Late Embryo Abundant (LEA) related	protein_coding	GO:0009269 (response to desiccation); GO:0005576 (extracellular region); GO:0008289 (lipid binding); GO:0006869 (lipid transport); GO:0042157 (lipoprotein metabolic process); GO:0006972 (hyperosmotic response); GO:0009408 (response to heat)	-1.55121	-2.44126	0.0146363	0.250138
WBGene00016368	183182		nhr-163	Nuclear Hormone Receptor family	protein_coding	GO:0005634 (nucleus); GO:0046872 (metal ion binding); GO:0003700 (DNA-binding transcription factor activity); GO:0006355 (regulation of transcription, DNA-templated); GO:0008270 (zinc ion binding); GO:0043565 (sequence-specific DNA binding); GO:0003677 (DNA binding)	2.59695	2.44055	0.014665	0.250317
WBGene00013748	190959	27284	ssu-1	Suppressor of Stomatin mutant Uncoordination	protein_coding	GO:0016020 (membrane); GO:0005737 (cytoplasm); GO:0016740 (transferase activity); GO:0008146 (sulfotransferase activity); GO:0005829 (cytosol); GO:0006970 (response to osmotic stress); GO:0006790 (sulfur compound metabolic process); GO:0004062 (aryl sulfotransferase activity); GO:0034930 (1-hydroxypyrene sulfotransferase activity); GO:0051923 (sulfation)	3.02979	2.4402	0.0146793	0.250317
WBGene00006948	180597		wrt-2	WaRThog (Hedgehog-like family)	protein_coding		2.71001	2.44023	0.014678	0.250317
WBGene00000749	181219		col-176	COLlagen	protein_coding	GO:0042302 (structural constituent of cuticle)	1.96359	2.43946	0.0147092	0.250535
WBGene00004123	181630		pqn-36	Prion-like-(Q/N-rich)-domain-bearing protein	protein_coding		1.81382	2.43863	0.0147431	0.250535
WBGene00021088	177097	5036	W08E12.7		protein_coding		-1.57017	-2.43893	0.0147307	0.250535
WBGene00022508	191066		ZC53.1		protein_coding		-2.08768	-2.43911	0.0147237	0.250535
WBGene00011600	177948		zim-2	Zinc finger In Meiosis	protein_coding	GO:0000794 (condensed nuclear chromosome); GO:0045132 (meiotic chromosome segregation)	-1.89059	-2.43855	0.0147463	0.250535
WBGene00009156	178506		clec-196	C-type LECtin	protein_coding	GO:0030246 (carbohydrate binding)	1.82331	2.43646	0.0148319	0.251619
WBGene00003993	182022		pgl-2	P granule abnormality protein 2	protein_coding		-1.82072	-2.43666	0.0148234	0.251619
WBGene00005007	177704	6418	spr-2	Suppressor of presenilin-2	protein_coding	GO:0005634 (nucleus); GO:0003682 (chromatin binding); GO:0042393 (histone binding); GO:0000785 (chromatin); GO:0006334 (nucleosome assembly); GO:0046662 (regulation of oviposition)	-1.58492	-2.43587	0.0148559	0.251842
WBGene00015056	181860		B0222.5		protein_coding	GO:0004867 (serine-type endopeptidase inhibitor activity); GO:0010951 (negative regulation of endopeptidase activity)	1.75939	2.43419	0.0149254	0.252778
WBGene00003936	175227		pat-12		protein_coding		1.59987	2.434	0.014933	0.252778
WBGene00018302	174112		F41G3.6		protein_coding		-1.65481	-2.43179	0.0150242	0.254118
WBGene00022390	190809		him-19	High Incidence of Males (Increased X chromosome loss)	protein_coding	GO:0042138 (meiotic DNA double-strand break formation); GO:0090173 (regulation of synaptonemal complex assembly)	-2.33644	-2.43129	0.0150451	0.254118
WBGene00003891	181772		osm-11		protein_coding	GO:0005615 (extracellular space); GO:0005112 (Notch binding); GO:0045747 (positive regulation of Notch signaling pathway); GO:0001708 (cell fate specification); GO:0040025 (vulval development); GO:0006970 (response to osmotic stress); GO:0045177 (apical part of cell)	1.59929	2.43131	0.0150443	0.254118
WBGene00007221	3565393		cpna-3	CoPiNe domain protein, Atypical	protein_coding	GO:0005886 (plasma membrane); GO:0005544 (calcium-dependent phospholipid binding); GO:0071277 (cellular response to calcium ion)	-1.62423	-2.43003	0.0150976	0.25469
WBGene00007131	181902		pals-26	Protein containing ALS2cr12 (ALS2CR12) signature	protein_coding		-2.11251	-2.42995	0.015101	0.25469
WBGene00019396	172334		K04F10.3	Endoplasmic reticulum-like protein	protein_coding		-1.68527	-2.42953	0.0151184	0.254771
WBGene00004345	181414	8601	rgs-2	Regulator of G-protein signaling rgs-2	protein_coding	GO:0043547 (positive regulation of GTPase activity); GO:0009968 (negative regulation of signal transduction); GO:0005096 (GTPase activator activity)	1.72396	2.4293	0.0151279	0.254771
WBGene00015464	179120		C05C8.7		protein_coding	GO:0046872 (metal ion binding); GO:0008270 (zinc ion binding); GO:0005829 (cytosol); GO:0005975 (carbohydrate metabolic process); GO:0016853 (isomerase activity); GO:0009298 (GDP-mannose biosynthetic process); GO:0006486 (protein glycosylation); GO:0000032 (cell wall mannoprotein biosynthetic process); GO:0004476 (mannose-6-phosphate isomerase activity)	1.64387	2.42711	0.0152198	0.256131
WBGene00001998	174958		hpr-17	Homolog of S. Pombe Rad; Rad17-like protein	protein_coding	GO:0005634 (nucleus); GO:0000166 (nucleotide binding); GO:0000077 (DNA damage checkpoint); GO:0005524 (ATP binding); GO:0003682 (chromatin binding); GO:0006281 (DNA repair); GO:0006974 (cellular response to DNA damage stimulus); GO:0033314 (mitotic DNA replication checkpoint)	-1.8088	-2.42601	0.0152658	0.25672
WBGene00220198			Y71G12B.42		ncRNA		-2.07637	-2.42565	0.0152811	0.256789
WBGene00219908			F20C5.10		ncRNA		-2.58763	-2.42482	0.0153161	0.257052
WBGene00001777	190225	27306	gst-29	Glutathione S-Transferase	protein_coding	GO:0016740 (transferase activity); GO:0006749 (glutathione metabolic process); GO:0004364 (glutathione transferase activity); GO:0005515 (protein binding)	-2.28064	-2.42449	0.0153297	0.257052
WBGene00005652	189285		srr-1	Serpentine Receptor, class R	protein_coding	GO:0016020 (membrane); GO:0016021 (integral component of membrane)	2.189	2.42449	0.0153301	0.257052
WBGene00009059	184848		chw-1	CHp/Wrch Rho-like protein homolog	protein_coding	GO:0003924 (GTPase activity); GO:0005525 (GTP binding); GO:0016477 (cell migration); GO:0006897 (endocytosis); GO:0030031 (cell projection assembly); GO:0032488 (Cdc42 protein signal transduction); GO:0040025 (vulval development); GO:0007163 (establishment or maintenance of cell polarity)	1.84839	2.42298	0.0153936	0.25793
WBGene00006538	181170	10383	tbb-4	Tubulin beta-4 chain	protein_coding	GO:0005525 (GTP binding); GO:0005737 (cytoplasm); GO:0000166 (nucleotide binding); GO:0003924 (GTPase activity); GO:0005856 (cytoskeleton); GO:0005874 (microtubule); GO:0007017 (microtubule-based process); GO:0005200 (structural constituent of cytoskeleton); GO:0000278 (mitotic cell cycle); GO:0000226 (microtubule cytoskeleton organization); GO:0005879 (axonemal microtubule)	1.90638	2.4221	0.0154311	0.25837
WBGene00002226	172784		klp-16	Kinesin-like protein	protein_coding	GO:0005634 (nucleus); GO:0005524 (ATP binding); GO:0000166 (nucleotide binding); GO:0003774 (motor activity); GO:0007018 (microtubule-based movement); GO:0008017 (microtubule binding); GO:0003777 (microtubule motor activity); GO:0005871 (kinesin complex); GO:0005874 (microtubule); GO:0005815 (microtubule organizing center); GO:0007059 (chromosome segregation); GO:0090307 (mitotic spindle assembly…	-1.61649	-2.42177	0.015445	0.258415
WBGene00011318	179995		cdt-2	CDT (S. pombe CDC10 Dependent Transcript) homolog	protein_coding	GO:0005634 (nucleus); GO:0043161 (proteasome-mediated ubiquitin-dependent protein catabolic process); GO:0005515 (protein binding)	-1.69803	-2.42132	0.0154641	0.258547
WBGene00000649	184366		col-73	COLlagen	protein_coding	GO:0016020 (membrane); GO:0016021 (integral component of membrane); GO:0042302 (structural constituent of cuticle)	10.4972	2.42094	0.0154803	0.258633
WBGene00011044	175148		R05H10.3		protein_coding		-1.74155	-2.42014	0.0155145	0.259016
WBGene00008027	178253		scl-5	SCP-Like extracellular protein	protein_coding	GO:0005615 (extracellular space); GO:0003674 (molecular_function); GO:0008150 (biological_process)	2.41244	2.4193	0.0155504	0.259427
WBGene00008033	178256	83985	spin-2	SPINster (Drosophila lysosomal permease) homolog	protein_coding	GO:0016020 (membrane); GO:0016021 (integral component of membrane); GO:0022857 (transmembrane transporter activity); GO:0055085 (transmembrane transport)	1.72319	2.41896	0.0155649	0.259482
WBGene00019429	172354		K06A5.1		protein_coding		-1.68824	-2.41831	0.015593	0.259711
WBGene00012878	178334		Y45F10C.2	UPF0375 protein Y45F10C.2	protein_coding	GO:0005576 (extracellular region)	-2.00927	-2.41812	0.0156011	0.259711
WBGene00022129	171837		lron-11	ELRR (Extracellular Leucine-Rich Repeat) ONly	protein_coding	GO:0016020 (membrane); GO:0016021 (integral component of membrane); GO:0005515 (protein binding)	1.72597	2.41783	0.0156134	0.259728
WBGene00009898	186056		dod-23	Downstream Of DAF-16 (Regulated by DAF-16)	protein_coding		-1.73887	-2.41591	0.0156961	0.260551
WBGene00019185	175169		H10E21.5		protein_coding	GO:0016020 (membrane); GO:0016021 (integral component of membrane); GO:0005737 (cytoplasm); GO:0046872 (metal ion binding); GO:0006511 (ubiquitin-dependent protein catabolic process); GO:0061630 (ubiquitin protein ligase activity); GO:0016567 (protein ubiquitination)	1.67718	2.41599	0.0156926	0.260551
WBGene00012052	188936		T26E4.10		protein_coding		62.0171	2.41589	0.0156967	0.260551
WBGene00007533	172759		cbl-1	Cystathionine Beta Lyase	protein_coding	GO:0005737 (cytoplasm); GO:0003824 (catalytic activity); GO:0030170 (pyridoxal phosphate binding); GO:0016846 (carbon-sulfur lyase activity); GO:0019346 (transsulfuration); GO:0019344 (cysteine biosynthetic process); GO:0004123 (cystathionine gamma-lyase activity); GO:0044540 (L-cystine L-cysteine-lyase (deaminating)); GO:0080146 (L-cysteine desulfhydrase activity)	-1.80631	-2.41554	0.0157118	0.260615
WBGene00017850	259627		F27B10.1		protein_coding	GO:0016020 (membrane); GO:0016021 (integral component of membrane)	1.82186	2.41438	0.0157618	0.261257
WBGene00020385	188325		nhr-216	Nuclear Hormone Receptor family	protein_coding	GO:0005634 (nucleus); GO:0046872 (metal ion binding); GO:0003700 (DNA-binding transcription factor activity); GO:0006355 (regulation of transcription, DNA-templated); GO:0008270 (zinc ion binding); GO:0043565 (sequence-specific DNA binding); GO:0003677 (DNA binding)	4.98339	2.41374	0.0157896	0.261453
WBGene00011524	174710	163404	plpr-1	PhosphoLipid Phosphatase Related homolog	protein_coding	GO:0016020 (membrane); GO:0016021 (integral component of membrane); GO:0006644 (phospholipid metabolic process); GO:0005887 (integral component of plasma membrane); GO:0007165 (signal transduction); GO:0008195 (phosphatidate phosphatase activity); GO:0042577 (lipid phosphatase activity); GO:0046839 (phospholipid dephosphorylation)	2.55954	2.41359	0.0157962	0.261453
WBGene00011979	188838		T24B8.5		protein_coding	GO:0045087 (innate immune response)	10.4499	2.4133	0.0158087	0.261471
WBGene00019280	173418	670	K01A2.5		protein_coding	GO:0016787 (hydrolase activity)	1.63983	2.41277	0.015832	0.26167
WBGene00009338	185211		F32G8.2		protein_coding	GO:0016020 (membrane); GO:0016021 (integral component of membrane); GO:0032504 (multicellular organism reproduction)	3.53892	2.41233	0.0158508	0.261794
WBGene00017082	183970	51741	DC2.5		protein_coding	GO:0016491 (oxidoreductase activity); GO:0055114 (oxidation-reduction process)	2.01604	2.41185	0.0158717	0.26195
WBGene00001171	178624		egl-2		protein_coding	GO:0016020 (membrane); GO:0016021 (integral component of membrane); GO:0005216 (ion channel activity); GO:0006811 (ion transport); GO:0055085 (transmembrane transport); GO:0005244 (voltage-gated ion channel activity); GO:0034765 (regulation of ion transmembrane transport); GO:0005249 (voltage-gated potassium channel activity); GO:0005267 (potassium channel activity); GO:0006813 (potassium ion tra…	1.74684	2.4096	0.0159701	0.263025
WBGene00019479	179200		K07C11.7	UPF0046 protein K07C11.7	protein_coding	GO:0016787 (hydrolase activity)	1.53691	2.40958	0.0159709	0.263025
WBGene00010773	187295		K11E4.1		protein_coding	GO:0006629 (lipid metabolic process)	2.13336	2.40966	0.0159675	0.263025
WBGene00015158	181940		B0361.4		protein_coding	GO:0019825 (oxygen binding); GO:0020037 (heme binding); GO:0003674 (molecular_function); GO:0005575 (cellular_component); GO:0008150 (biological_process)	2.01753	2.40899	0.0159967	0.263262
WBGene00016801	183642		C50C3.5	Uncharacterized calcium-binding protein C50C3.5	protein_coding	GO:0005509 (calcium ion binding); GO:0046872 (metal ion binding); GO:0051015 (actin filament binding); GO:0003009 (skeletal muscle contraction); GO:0005861 (troponin complex); GO:0003674 (molecular_function); GO:0005575 (cellular_component); GO:0008150 (biological_process); GO:0006937 (regulation of muscle contraction); GO:0048306 (calcium-dependent protein binding)	1.73672	2.40864	0.0160119	0.263324
WBGene00006611	173388	11181	tre-5	Trehalase	protein_coding	GO:0008152 (metabolic process); GO:0016787 (hydrolase activity); GO:0016798 (hydrolase activity, acting on glycosyl bonds); GO:0005975 (carbohydrate metabolic process); GO:0004555 (alpha,alpha-trehalase activity); GO:0005991 (trehalose metabolic process); GO:0015927 (trehalase activity)	2.4918	2.40727	0.0160723	0.26413
WBGene00006938	192085		wee-1.1	Membrane-associated tyrosine- and threonine-specific cdc2-inhibitory kinase wee-1.1	protein_coding	GO:0004672 (protein kinase activity); GO:0006468 (protein phosphorylation); GO:0005524 (ATP binding)	3.80465	2.40592	0.0161317	0.264917
WBGene00001518	175893		gar-2	Muscarinic acetylcholine receptor gar-2	protein_coding	GO:0005887 (integral component of plasma membrane); GO:0016907 (G protein-coupled acetylcholine receptor activity); GO:0004930 (G protein-coupled receptor activity); GO:0007186 (G protein-coupled receptor signaling pathway); GO:0016021 (integral component of membrane); GO:0016020 (membrane); GO:0007165 (signal transduction); GO:0007213 (G protein-coupled acetylcholine receptor signaling pathway);…	1.65514	2.40429	0.016204	0.265916
WBGene00007106	178044	140733	B0035.3		protein_coding	GO:0005654 (nucleoplasm); GO:0006974 (cellular response to DNA damage stimulus); GO:0140293 (ADP-ribosylglutamate hydrolase activity); GO:0042278 (purine nucleoside metabolic process); GO:0140291 (peptidyl-glutamate ADP-deribosylation)	-1.70008	-2.4026	0.0162789	0.266955
WBGene00017485	177193		F15E6.4		protein_coding		2.30023	2.40104	0.0163485	0.267718
WBGene00011107	181240		R07E3.6		protein_coding		2.89111	2.40129	0.0163372	0.267718
WBGene00009635	185670	6716	F42F12.3		protein_coding	GO:0016020 (membrane); GO:0016021 (integral component of membrane); GO:0016627 (oxidoreductase activity, acting on the CH-CH group of donors); GO:0006629 (lipid metabolic process); GO:0016491 (oxidoreductase activity); GO:0007548 (sex differentiation); GO:0003865 (3-oxo-5-alpha-steroid 4-dehydrogenase activity); GO:0006694 (steroid biosynthetic process); GO:0008202 (steroid metabolic process); GO…	-1.6529	-2.40002	0.0163941	0.267743
WBGene00016670	177033		ilys-3	Invertebrate-type lysozyme 3	protein_coding	GO:0003796 (lysozyme activity)	-3.47839	-2.40012	0.0163896	0.267743
WBGene00021936	190312	23516	zipt-15	Zrt (ZRT), Irt-(IRT-) like Protein Transporter	protein_coding	GO:0016020 (membrane); GO:0016021 (integral component of membrane); GO:0055085 (transmembrane transport); GO:0005887 (integral component of plasma membrane); GO:0005385 (zinc ion transmembrane transporter activity); GO:0030001 (metal ion transport); GO:0046873 (metal ion transmembrane transporter activity); GO:0006882 (cellular zinc ion homeostasis); GO:0071578 (zinc ion import across plasma memb…	-1.57869	-2.40014	0.0163889	0.267743
WBGene00013959	191278		ZK265.7		protein_coding		1.67176	2.39997	0.0163965	0.267743
WBGene00044303	3564879		hst-3.2	Heparan SulphoTransferase	protein_coding	GO:0016740 (transferase activity); GO:0008146 (sulfotransferase activity); GO:0008467 ([heparan sulfate]-glucosamine 3-sulfotransferase 1 activity); GO:0015012 (heparan sulfate proteoglycan biosynthetic process); GO:0005796 (Golgi lumen)	1.93896	2.39963	0.0164117	0.267802
WBGene00015783	180921	51268	C15B12.1	Putative sarcosine oxidase	protein_coding	GO:0016491 (oxidoreductase activity); GO:0005777 (peroxisome); GO:0008115 (sarcosine oxidase activity); GO:0033514 (L-lysine catabolic process to acetyl-CoA via L-pipecolate); GO:0050031 (L-pipecolate oxidase activity); GO:0055114 (oxidation-reduction process)	-1.85553	-2.39858	0.0164589	0.268194
WBGene00008152	183555		C47E12.9		protein_coding		1.9519	2.39859	0.0164584	0.268194
WBGene00010512	186894		K02E11.3		protein_coding		2.15565	2.39807	0.0164815	0.268374
WBGene00013646	190886		Y105C5B.3	Purple acid phosphatase	protein_coding	GO:0016787 (hydrolase activity); GO:0046872 (metal ion binding); GO:0003993 (acid phosphatase activity); GO:0016311 (dephosphorylation)	3.57737	2.397	0.0165299	0.268971
WBGene00002107	173266		ins-24	INSulin related	protein_coding	GO:0005576 (extracellular region); GO:0005179 (hormone activity); GO:0007165 (signal transduction)	2.30305	2.39669	0.0165438	0.269008
WBGene00004096	174705		pqm-1	ParaQuat (Methylviologen) responsive; Paraquat responsive protein	protein_coding	GO:0005634 (nucleus); GO:0043565 (sequence-specific DNA binding); GO:0000981 (DNA-binding transcription factor activity, RNA polymerase II-specific); GO:0006357 (regulation of transcription by RNA polymerase II); GO:0045087 (innate immune response); GO:0005737 (cytoplasm); GO:0008340 (determination of adult lifespan); GO:0050829 (defense response to Gram-negative bacterium); GO:0008134 (transcrip…	-1.58546	-2.39566	0.0165907	0.269581
WBGene00010497	186869		axl-1	Axin-like protein 1	protein_coding	GO:0090090 (negative regulation of canonical Wnt signaling pathway)	2.76804	2.39455	0.0166406	0.270012
WBGene00018903	186328		F55G1.7		protein_coding		-2.67745	-2.39457	0.0166401	0.270012
WBGene00000395	176085		cdh-3	Cadherin-3	protein_coding	GO:0005886 (plasma membrane); GO:0007155 (cell adhesion); GO:0007156 (homophilic cell adhesion via plasma membrane adhesion molecules); GO:0005509 (calcium ion binding); GO:0016020 (membrane)	1.6894	2.39364	0.016682	0.270305
WBGene00016944	183841		uri-1	URI (Unconventional prefoldin RPB5 Interactor) homolog	protein_coding	GO:0003682 (chromatin binding); GO:0000122 (negative regulation of transcription by RNA polymerase II); GO:0003714 (transcription corepressor activity); GO:0010923 (negative regulation of phosphatase activity); GO:0019212 (phosphatase inhibitor activity); GO:0000077 (DNA damage checkpoint); GO:0042078 (germ-line stem cell division); GO:0051446 (positive regulation of meiotic cell cycle); GO:00427…	-1.62673	-2.39367	0.0166806	0.270305
WBGene00008172	183567		C48B4.9		protein_coding		-1.95635	-2.39313	0.0167054	0.270495
WBGene00017142	184046		EEED8.14		protein_coding		-1.92227	-2.39221	0.0167471	0.27098
WBGene00013486	180219		egas-1	EGF plus ASC domain ion channel	protein_coding	GO:0016020 (membrane); GO:0016021 (integral component of membrane); GO:0005509 (calcium ion binding); GO:0006811 (ion transport); GO:0005887 (integral component of plasma membrane); GO:0005272 (sodium channel activity); GO:0006814 (sodium ion transport); GO:0035725 (sodium ion transmembrane transport); GO:0015280 (ligand-gated sodium channel activity)	5.0591	2.39099	0.0168029	0.271675
WBGene00011023	178370		R05A10.6		protein_coding	GO:0016020 (membrane); GO:0016740 (transferase activity); GO:0016757 (transferase activity, transferring glycosyl groups)	4.08332	2.39076	0.0168136	0.271675
WBGene00020054	179128		R13D7.2		protein_coding		2.2065	2.3902	0.016839	0.271895
WBGene00044329	178151	10898	cpsf-4	Cleavage and Polyadenylation Specificity Factor	protein_coding	GO:0005634 (nucleus); GO:0046872 (metal ion binding); GO:0008270 (zinc ion binding); GO:0003676 (nucleic acid binding); GO:0098789 (pre-mRNA cleavage required for polyadenylation)	-1.64349	-2.38957	0.0168683	0.272178
WBGene00017418	177516		F13B6.3		protein_coding		1.6282	2.38914	0.0168877	0.272301
WBGene00001557	191658	2983	gcy-37	Soluble guanylate cyclase gcy-37	protein_coding	GO:0016849 (phosphorus-oxygen lyase activity); GO:0006182 (cGMP biosynthetic process); GO:0004383 (guanylate cyclase activity); GO:0009190 (cyclic nucleotide biosynthetic process); GO:0020037 (heme binding); GO:0035556 (intracellular signal transduction)	2.39344	2.38882	0.0169027	0.272353
WBGene00044445	3896734		C02F5.14		protein_coding		1.70629	2.38803	0.0169387	0.27263
WBGene00019650	260212		K11D12.11		protein_coding	GO:0004867 (serine-type endopeptidase inhibitor activity); GO:0010951 (negative regulation of endopeptidase activity)	1.64562	2.38771	0.0169537	0.27263
WBGene00003574	182576	80024	ncx-9	Mitochondrial sodium/calcium exchanger protein	protein_coding	GO:0016021 (integral component of membrane); GO:0055085 (transmembrane transport)	6.74625	2.38768	0.0169553	0.27263
WBGene00011328	179861		T01D3.3		protein_coding	GO:0005576 (extracellular region); GO:0046872 (metal ion binding); GO:0010951 (negative regulation of endopeptidase activity); GO:0010466 (negative regulation of peptidase activity); GO:0030414 (peptidase inhibitor activity); GO:0006801 (superoxide metabolic process); GO:0004867 (serine-type endopeptidase inhibitor activity)	1.67861	2.38655	0.0170071	0.273273
WBGene00008147	177858		C47E12.2		protein_coding	GO:0016020 (membrane); GO:0016021 (integral component of membrane); GO:0055085 (transmembrane transport); GO:0005743 (mitochondrial inner membrane); GO:0005471 (ATP:ADP antiporter activity); GO:1990544 (mitochondrial ATP transmembrane transport); GO:0140021 (mitochondrial ADP transmembrane transport)	-1.66791	-2.38614	0.0170262	0.273389
WBGene00019968	178797		R08F11.4		protein_coding		-1.57454	-2.3857	0.0170468	0.27353
WBGene00008567	173164	51	acox-1.4	Acyl-coenzyme A oxidase	protein_coding	GO:0000166 (nucleotide binding); GO:0016491 (oxidoreductase activity); GO:0005524 (ATP binding); GO:0005777 (peroxisome); GO:0006631 (fatty acid metabolic process); GO:0016627 (oxidoreductase activity, acting on the CH-CH group of donors); GO:0050660 (flavin adenine dinucleotide binding); GO:0006629 (lipid metabolic process); GO:0071949 (FAD binding); GO:0042811 (pheromone biosynthetic process); …	-1.78118	-2.38519	0.0170705	0.273531
WBGene00219236	13212643		K03B4.9		protein_coding		3.43781	2.3853	0.017065	0.273531
WBGene00010315	186597		F59B2.13	Putative G-protein coupled receptor F59B2.13	protein_coding	GO:0016020 (membrane); GO:0016021 (integral component of membrane); GO:0005886 (plasma membrane); GO:0004930 (G protein-coupled receptor activity); GO:0007165 (signal transduction); GO:0007186 (G protein-coupled receptor signaling pathway); GO:0008528 (G protein-coupled peptide receptor activity)	1.79753	2.38489	0.0170841	0.273559
WBGene00007391	3565909		C06H2.7		protein_coding		-1.93067	-2.38442	0.0171059	0.273645
WBGene00016534	181050		C39D10.7		protein_coding	GO:0005576 (extracellular region); GO:0008061 (chitin binding); GO:0005515 (protein binding)	-1.85291	-2.38412	0.01712	0.273645
WBGene00017374	24104420		ttr-41	TransThyretin-Related family domain	protein_coding	GO:0005576 (extracellular region); GO:0009986 (cell surface)	-1.57488	-2.38401	0.017125	0.273645
WBGene00007444	178022	6832	C08F8.2	ATP-dependent RNA helicase SUV3 homolog, mitochondrial	protein_coding	GO:0016787 (hydrolase activity); GO:0004386 (helicase activity); GO:0005634 (nucleus); GO:0000166 (nucleotide binding); GO:0005524 (ATP binding); GO:0003677 (DNA binding); GO:0005739 (mitochondrion); GO:0016817 (hydrolase activity, acting on acid anhydrides); GO:0005759 (mitochondrial matrix); GO:0006401 (RNA catabolic process); GO:0000965 (mitochondrial RNA 3'-end processing); GO:0003678 (DNA he…	-1.71543	-2.38301	0.0171719	0.27379
WBGene00008287	183767		C54C6.5		protein_coding		2.8619	2.38333	0.017157	0.27379
WBGene00001760	185408	27306	gst-12	Glutathione S-Transferase	protein_coding	GO:0016740 (transferase activity); GO:0006749 (glutathione metabolic process); GO:0004364 (glutathione transferase activity); GO:0005515 (protein binding)	2.26581	2.3828	0.0171815	0.27379
WBGene00010449	186827		K01A11.1		protein_coding		1.69729	2.38317	0.0171643	0.27379
WBGene00000862	178894		cwp-4	Coexpressed With Polycystins	protein_coding		3.80582	2.38205	0.0172166	0.273945
WBGene00009374	175484		F34D10.4		protein_coding		-1.55748	-2.38183	0.0172268	0.273945
WBGene00020703	188758		T22F7.4		protein_coding		-1.72672	-2.38185	0.017226	0.273945
WBGene00023500	3564775		C11H1.9		protein_coding		1.77888	2.38054	0.0172875	0.274721
WBGene00018787	171678		cutl-20	CUTiclin-Like	protein_coding		1.77528	2.37973	0.0173255	0.275136
WBGene00000592	179949		coh-3	COHesin family	protein_coding	GO:0051177 (meiotic sister chromatid cohesion)	-1.83448	-2.3793	0.0173454	0.275203
WBGene00010321	186599		F59B10.5		protein_coding		1.98336	2.37913	0.0173535	0.275203
WBGene00009908	186073		F49H6.5		protein_coding	GO:0003824 (catalytic activity); GO:0046872 (metal ion binding); GO:0000166 (nucleotide binding); GO:0005525 (GTP binding); GO:0016829 (lyase activity); GO:0006777 (Mo-molybdopterin cofactor biosynthetic process); GO:0019008 (molybdopterin synthase complex); GO:0051536 (iron-sulfur cluster binding); GO:0051539 (4 iron, 4 sulfur cluster binding); GO:0061798 (GTP 3',8'-cyclase activity)	-2.76706	-2.37829	0.0173932	0.275642
WBGene00008169	183566		C48B4.6		protein_coding		-2.15026	-2.37783	0.0174147	0.275795
WBGene00012759	189815		sup-1		protein_coding	GO:0016020 (membrane); GO:0016021 (integral component of membrane); GO:0005886 (plasma membrane); GO:0031410 (cytoplasmic vesicle); GO:0030054 (cell junction); GO:0045202 (synapse); GO:0042995 (cell projection); GO:0008021 (synaptic vesicle); GO:0043204 (perikaryon); GO:0043025 (neuronal cell body); GO:0043005 (neuron projection); GO:0032809 (neuronal cell body membrane)	1.57143	2.37724	0.0174427	0.276049
WBGene00000920	191014		daf-28		protein_coding	GO:0005576 (extracellular region); GO:0005179 (hormone activity); GO:1905909 (regulation of dauer entry); GO:0008582 (regulation of synaptic growth at neuromuscular junction); GO:1905910 (negative regulation of dauer entry); GO:0040024 (dauer larval development); GO:1900181 (negative regulation of protein localization to nucleus); GO:0045202 (synapse); GO:0005615 (extracellular space); GO:0008286…	2.39047	2.37646	0.0174794	0.276441
WBGene00012316	189267	1503	ctps-1	CTP synthase	protein_coding	GO:0005737 (cytoplasm); GO:0000166 (nucleotide binding); GO:0016874 (ligase activity); GO:0005524 (ATP binding); GO:0006221 (pyrimidine nucleotide biosynthetic process); GO:0003883 (CTP synthase activity); GO:0006241 (CTP biosynthetic process); GO:0006541 (glutamine metabolic process); GO:0019856 (pyrimidine nucleobase biosynthetic process); GO:0042802 (identical protein binding); GO:0044210 ('de…	-1.62406	-2.37586	0.0175081	0.276705
WBGene00006463	188912	4720	nduf-2.2	NADH Ubiquinone oxidoreductase Fe-S protein	protein_coding	GO:0048038 (quinone binding); GO:0051287 (NAD binding); GO:0005747 (mitochondrial respiratory chain complex I); GO:0006120 (mitochondrial electron transport, NADH to ubiquinone); GO:0008137 (NADH dehydrogenase (ubiquinone) activity); GO:0016651 (oxidoreductase activity, acting on NAD(P)H); GO:0055114 (oxidation-reduction process)	-1.62381	-2.37456	0.0175697	0.277488
WBGene00016939	180984	256356	C55B6.1		protein_coding	GO:0005739 (mitochondrion); GO:0005975 (carbohydrate metabolic process); GO:0004370 (glycerol kinase activity); GO:0006071 (glycerol metabolic process); GO:0006641 (triglyceride metabolic process); GO:0016310 (phosphorylation); GO:0016773 (phosphotransferase activity, alcohol group as acceptor); GO:0046167 (glycerol-3-phosphate biosynthetic process)	-1.92704	-2.37207	0.017689	0.279181
WBGene00000746	180960		col-173	COLlagen	protein_coding	GO:0016020 (membrane); GO:0016021 (integral component of membrane); GO:0042302 (structural constituent of cuticle)	4.0289	2.37135	0.0177234	0.279208
WBGene00017028	175761		dex-1	Dendrite extension defective protein 1	protein_coding	GO:0007160 (cell-matrix adhesion); GO:0005509 (calcium ion binding)	1.61203	2.37155	0.0177136	0.279208
WBGene00195086	13214280		F21C10.13		protein_coding	GO:0016020 (membrane); GO:0016021 (integral component of membrane)	2.90898	2.37102	0.017739	0.279208
WBGene00004924	172346		snt-4	SyNapTotagmin	protein_coding	GO:0016020 (membrane); GO:0016021 (integral component of membrane); GO:0005886 (plasma membrane); GO:0045202 (synapse); GO:0000149 (SNARE binding); GO:0001786 (phosphatidylserine binding); GO:0005509 (calcium ion binding); GO:0005544 (calcium-dependent phospholipid binding); GO:0014059 (regulation of dopamine secretion); GO:0016192 (vesicle-mediated transport); GO:0017156 (calcium-ion regulated e…	1.54663	2.37118	0.0177316	0.279208
WBGene00013588	180235		nlp-42	Neuropeptide-Like Protein	protein_coding	GO:0007218 (neuropeptide signaling pathway)	1.8023	2.37035	0.0177712	0.279525
WBGene00009816	185904		F47B10.5		protein_coding	GO:0016020 (membrane); GO:0016021 (integral component of membrane)	1.9127	2.36898	0.0178371	0.28037
WBGene00004013	180357		pha-4	Defective pharyngeal development protein 4	protein_coding	GO:0043565 (sequence-specific DNA binding); GO:0003700 (DNA-binding transcription factor activity); GO:0006355 (regulation of transcription, DNA-templated)	1.61382	2.36864	0.0178537	0.28044
WBGene00003839	188314		ocr-2	Osm-9 and Capsaicin receptor-Related	protein_coding	GO:0016020 (membrane); GO:0016021 (integral component of membrane); GO:0005216 (ion channel activity); GO:0006811 (ion transport); GO:0055085 (transmembrane transport); GO:0005887 (integral component of plasma membrane); GO:0005262 (calcium channel activity); GO:0005886 (plasma membrane); GO:0097730 (non-motile cilium); GO:0005515 (protein binding); GO:0098703 (calcium ion import across plasma me…	1.90172	2.36834	0.017868	0.280474
WBGene00015282	177431	51603	C01B10.8		protein_coding	GO:0005515 (protein binding)	-1.66851	-2.36767	0.0179006	0.280795
WBGene00011105	187678		R07E3.4		protein_coding	GO:0016020 (membrane); GO:0016021 (integral component of membrane); GO:0055085 (transmembrane transport); GO:0005743 (mitochondrial inner membrane); GO:0005471 (ATP:ADP antiporter activity); GO:1990544 (mitochondrial ATP transmembrane transport); GO:0140021 (mitochondrial ADP transmembrane transport)	-1.68661	-2.36649	0.0179576	0.281066
WBGene00019013	172098		tofu-4	Twenty One u-rna (21U-RNA) biogenesis Fouled Up	protein_coding		-2.01227	-2.36684	0.0179405	0.281066
WBGene00006609	179604	11181	tre-3	Trehalase	protein_coding	GO:0008152 (metabolic process); GO:0016787 (hydrolase activity); GO:0016798 (hydrolase activity, acting on glycosyl bonds); GO:0005975 (carbohydrate metabolic process); GO:0004555 (alpha,alpha-trehalase activity); GO:0005991 (trehalose metabolic process); GO:0045121 (membrane raft); GO:0015927 (trehalase activity)	-1.67169	-2.36631	0.0179665	0.281066
WBGene00022497	246006		Y119D3B.21		protein_coding		1.55043	2.36646	0.0179591	0.281066
WBGene00002043	177660	91012	hyl-1	Ceramide synthase hyl-1	protein_coding	GO:0016021 (integral component of membrane); GO:0016020 (membrane); GO:0006665 (sphingolipid metabolic process)	-1.59713	-2.36533	0.018014	0.281281
WBGene00005021	176382	11285	sqv-3	Xylosylprotein 4-beta-galactosyltransferase	protein_coding	GO:0016020 (membrane); GO:0016021 (integral component of membrane); GO:0046872 (metal ion binding); GO:0016740 (transferase activity); GO:0016757 (transferase activity, transferring glycosyl groups); GO:0005794 (Golgi apparatus); GO:0005975 (carbohydrate metabolic process); GO:0006486 (protein glycosylation); GO:0048680 (positive regulation of axon regeneration); GO:0046525 (xylosylprotein 4-beta…	-1.77124	-2.36573	0.0179943	0.281281
WBGene00007604	179742		xbx-9	X-BoX promoter element regulated	protein_coding	GO:0016020 (membrane); GO:0016021 (integral component of membrane)	1.96324	2.36502	0.018029	0.281281
WBGene00022112	171858		Y71F9AL.7		protein_coding		1.89801	2.36513	0.0180236	0.281281
WBGene00007649	182741		C17G1.2		protein_coding	GO:0016020 (membrane); GO:0016021 (integral component of membrane)	-1.81813	-2.36458	0.0180504	0.281425
WBGene00018682	180400	23193	aagr-4	Acid Alpha Glucosidase Relate	protein_coding	GO:0003824 (catalytic activity); GO:0008152 (metabolic process); GO:0016787 (hydrolase activity); GO:0016798 (hydrolase activity, acting on glycosyl bonds); GO:0005975 (carbohydrate metabolic process); GO:0030246 (carbohydrate binding); GO:0004553 (hydrolase activity, hydrolyzing O-glycosyl compounds); GO:0006491 (N-glycan processing); GO:0090599 (alpha-glucosidase activity)	1.64321	2.36396	0.0180809	0.281615
WBGene00022743	173775		mlt-7	Peroxidase mlt-7 Peroxidase mlt-7 light chain Peroxidase mlt-7 heavy chain	protein_coding	GO:0004601 (peroxidase activity); GO:0006979 (response to oxidative stress); GO:0020037 (heme binding); GO:0055114 (oxidation-reduction process)	1.90725	2.36383	0.0180869	0.281615
WBGene00012808	189865		Y43F8A.1		protein_coding		3.08068	2.36341	0.0181075	0.281746
WBGene00022515	191072		ttr-48	TransThyretin-Related family domain	protein_coding	GO:0005576 (extracellular region); GO:0009986 (cell surface)	-1.63909	-2.36252	0.0181512	0.282046
WBGene00012538	178360	8991	Y37A1B.5		protein_coding	GO:0008430 (selenium binding)	1.71309	2.36276	0.0181395	0.282046
WBGene00008914	184614		F17C11.2		protein_coding		-1.55686	-2.36209	0.0181724	0.282185
WBGene00001092	191629	1810	dro-1	DR1 (One) transcription factor family	protein_coding	GO:0045944 (positive regulation of transcription by RNA polymerase II); GO:0046982 (protein heterodimerization activity); GO:0051123 (RNA polymerase II preinitiation complex assembly); GO:0000122 (negative regulation of transcription by RNA polymerase II); GO:0003713 (transcription coactivator activity); GO:0003714 (transcription corepressor activity); GO:0017025 (TBP-class protein binding); GO:0…	-1.68476	-2.36163	0.0181946	0.282339
WBGene00020104	175422		R148.5		protein_coding		1.55589	2.35984	0.018283	0.283521
WBGene00012123	176567		T28D6.3		protein_coding		2.20738	2.35932	0.0183082	0.283722
WBGene00001569	180510		meg-3		protein_coding	GO:0009792 (embryo development ending in birth or egg hatching); GO:0005515 (protein binding); GO:0005737 (cytoplasm); GO:1903863 (P granule assembly); GO:0043186 (P granule); GO:0036093 (germ cell proliferation); GO:0051640 (organelle localization)	-1.64728	-2.35814	0.0183668	0.284169
WBGene00013187	175131	2587	npr-34	NeuroPeptide Receptor family	protein_coding	GO:0016020 (membrane); GO:0016021 (integral component of membrane); GO:0004930 (G protein-coupled receptor activity); GO:0004983 (neuropeptide Y receptor activity); GO:0007165 (signal transduction); GO:0007186 (G protein-coupled receptor signaling pathway); GO:0007218 (neuropeptide signaling pathway)	2.77742	2.35801	0.0183731	0.284169
WBGene00013492	190566	3416	Y70C5C.1		protein_coding	GO:0016787 (hydrolase activity); GO:0005739 (mitochondrion); GO:0006508 (proteolysis); GO:0008233 (peptidase activity); GO:0008237 (metallopeptidase activity); GO:0051603 (proteolysis involved in cellular protein catabolic process); GO:0046872 (metal ion binding); GO:0043171 (peptide catabolic process)	3.03225	2.358	0.0183739	0.284169
WBGene00015857	179207		C16D9.1		protein_coding		2.30807	2.3572	0.0184133	0.284397
WBGene00001819	172288	23457	haf-9	HAlF transporter (PGP related)	protein_coding	GO:0016020 (membrane); GO:0016021 (integral component of membrane); GO:0005524 (ATP binding); GO:0042626 (ATPase-coupled transmembrane transporter activity); GO:0000166 (nucleotide binding); GO:0055085 (transmembrane transport); GO:0002376 (immune system process); GO:0098656 (anion transmembrane transport); GO:0015833 (peptide transport); GO:1904680 (peptide transmembrane transporter activity); G…	-1.71444	-2.35733	0.0184071	0.284397
WBGene00018894	3565409		mff-2	Mitochondrial Fission Factor	protein_coding	GO:0016020 (membrane); GO:0016021 (integral component of membrane); GO:0005739 (mitochondrion)	-1.67064	-2.35658	0.018444	0.284491
WBGene00021984	173577		Y59C2A.1		protein_coding	GO:0016787 (hydrolase activity); GO:0046872 (metal ion binding); GO:0008270 (zinc ion binding); GO:0006508 (proteolysis); GO:0008233 (peptidase activity); GO:0008237 (metallopeptidase activity); GO:0005615 (extracellular space); GO:0004181 (metallocarboxypeptidase activity); GO:0004180 (carboxypeptidase activity)	1.52835	2.35669	0.0184385	0.284491
WBGene00001328	177956	3911	epi-1	Laminin-like protein epi-1	protein_coding	GO:0007155 (cell adhesion); GO:0016477 (cell migration); GO:0005604 (basement membrane); GO:0040017 (positive regulation of locomotion); GO:0000003 (reproduction); GO:0001764 (neuron migration); GO:0007414 (axonal defasciculation); GO:0009408 (response to heat); GO:0010950 (positive regulation of endopeptidase activity); GO:0042127 (regulation of cell population proliferation); GO:0051788 (respon…	1.52815	2.35607	0.0184696	0.284695
WBGene00008484	259462		E04D5.5		protein_coding		1.63986	2.35521	0.0185124	0.284976
WBGene00020404	172425		T10B11.8		protein_coding		-1.84939	-2.3554	0.0185027	0.284976
WBGene00003421	178268	4439	msh-5	MutS protein homolog 5	protein_coding	GO:0006298 (mismatch repair); GO:0030983 (mismatched DNA binding); GO:0005524 (ATP binding)	-1.79307	-2.35326	0.0186099	0.286284
WBGene00006505	189370	10715	lagr-1	Probable ceramide synthase lagr-1	protein_coding	GO:0016021 (integral component of membrane)	2.1247	2.35209	0.0186681	0.286609
WBGene00020051	176073	54842	mfsd-6	Major Facilitator Superfamily Domain containing homolog	protein_coding	GO:0016020 (membrane); GO:0016021 (integral component of membrane)	1.6511	2.35227	0.0186592	0.286609
WBGene00018225			nep-14		pseudogene		1.68462	2.35212	0.0186668	0.286609
WBGene00006712	181979		ubc-17	Probable ubiquitin-conjugating enzyme protein 17	protein_coding	GO:0005634 (nucleus); GO:0016740 (transferase activity); GO:0006511 (ubiquitin-dependent protein catabolic process); GO:0016874 (ligase activity); GO:0016567 (protein ubiquitination); GO:0010951 (negative regulation of endopeptidase activity); GO:0061631 (ubiquitin conjugating enzyme activity); GO:0043066 (negative regulation of apoptotic process); GO:0004869 (cysteine-type endopeptidase inhibito…	1.7954	2.35044	0.0187511	0.287691
WBGene00006942	181093		wrk-1	Wrapper/Rega-1/Klingon homolog	protein_coding	GO:0005886 (plasma membrane); GO:0007156 (homophilic cell adhesion via plasma membrane adhesion molecules); GO:0030424 (axon); GO:0043025 (neuronal cell body); GO:0050808 (synapse organization); GO:0007411 (axon guidance); GO:0008046 (axon guidance receptor activity)	-1.68371	-2.34966	0.0187904	0.288102
WBGene00008194	178513		C49C3.4		protein_coding		1.60633	2.34725	0.0189123	0.289588
WBGene00235391	24104553		F38A5.22		protein_coding	GO:0009986 (cell surface)	-1.78506	-2.34748	0.0189006	0.289588
WBGene00012535	178355		Y37A1A.2		protein_coding	GO:0016020 (membrane); GO:0016021 (integral component of membrane)	2.04205	2.34552	0.0190007	0.290749
WBGene00206466	13223017		T08D10.5		protein_coding	GO:0016020 (membrane); GO:0016021 (integral component of membrane)	-1.86918	-2.34468	0.0190434	0.291209
WBGene00008570	172602		kcnl-2	KCNN (Potassium K ChaNNel, calcium activated)-Like	protein_coding	GO:0016020 (membrane); GO:0016021 (integral component of membrane); GO:0006811 (ion transport); GO:0005886 (plasma membrane); GO:0043005 (neuron projection); GO:0071805 (potassium ion transmembrane transport); GO:0006813 (potassium ion transport); GO:0005516 (calmodulin binding); GO:0043025 (neuronal cell body); GO:0015269 (calcium-activated potassium channel activity); GO:0016286 (small conducta…	1.73344	2.34384	0.0190862	0.291671
WBGene00019148	181103		H03E18.1		protein_coding		2.59371	2.34266	0.019147	0.292356
WBGene00021400	189642		Y38C1AA.9		protein_coding	GO:0005112 (Notch binding)	2.13633	2.34247	0.0191564	0.292356
WBGene00009787	181619		F46F2.3		protein_coding		2.13418	2.3412	0.0192221	0.293166
WBGene00022635	172385		ZC581.9		protein_coding	GO:0005524 (ATP binding); GO:0004672 (protein kinase activity); GO:0006468 (protein phosphorylation); GO:0016301 (kinase activity); GO:0016310 (phosphorylation)	1.7137	2.3399	0.0192887	0.293987
WBGene00008593	184216		clec-227	C-type LECtin	protein_coding	GO:0030246 (carbohydrate binding)	-4.7063	-2.33896	0.0193375	0.294463
WBGene00020413	172364		T10E9.3		protein_coding		2.03198	2.33881	0.0193454	0.294463
WBGene00009349	179816		F32H5.3		protein_coding		2.33791	2.33726	0.0194255	0.294524
WBGene00018969	173750		F56D3.1		protein_coding		2.13104	2.33774	0.0194005	0.294524
WBGene00004234	175165		ptr-20	PaTched Related family	protein_coding	GO:0016020 (membrane); GO:0016021 (integral component of membrane); GO:0005886 (plasma membrane); GO:0030659 (cytoplasmic vesicle membrane); GO:0006897 (endocytosis); GO:0090597 (nematode male tail mating organ morphogenesis); GO:0018996 (molting cycle, collagen and cuticulin-based cuticle); GO:0045138 (nematode male tail tip morphogenesis)	1.88885	2.33683	0.0194482	0.294524
WBGene00011274	174555	84293	R53.5		protein_coding	GO:0005737 (cytoplasm); GO:0016209 (antioxidant activity); GO:0098869 (cellular oxidant detoxification); GO:0055114 (oxidation-reduction process)	-1.57119	-2.33822	0.019376	0.294524
WBGene00004950	185534		sox-3	SOX (Mammalian SRY box) family	protein_coding	GO:0000978 (RNA polymerase II cis-regulatory region sequence-specific DNA binding); GO:0000981 (DNA-binding transcription factor activity, RNA polymerase II-specific); GO:0006355 (regulation of transcription, DNA-templated); GO:0006357 (regulation of transcription by RNA polymerase II); GO:0030154 (cell differentiation); GO:0009653 (anatomical structure morphogenesis); GO:0043565 (sequence-specif…	1.77455	2.3369	0.0194441	0.294524
WBGene00020817	259737		T25G12.11		protein_coding	GO:0016020 (membrane); GO:0016021 (integral component of membrane)	1.81297	2.33628	0.0194769	0.294524
WBGene00020896	28661658		T28D9.4		protein_coding	GO:0016020 (membrane); GO:0016021 (integral component of membrane)	-1.69785	-2.33758	0.0194088	0.294524
WBGene00012226	181377		W03G11.4		protein_coding		1.57367	2.33646	0.0194673	0.294524
WBGene00022285	190697		Y75B7AL.2		protein_coding	GO:0016020 (membrane); GO:0016021 (integral component of membrane); GO:0005886 (plasma membrane); GO:0015031 (protein transport); GO:0006898 (receptor-mediated endocytosis); GO:0008104 (protein localization); GO:0030139 (endocytic vesicle); GO:0016324 (apical plasma membrane)	-1.66756	-2.33642	0.0194692	0.294524
WBGene00045305	6418818		ZC250.4		protein_coding		-1.97472	-2.33845	0.0193637	0.294524
WBGene00003739	180661		nlp-1	Neuropeptide-like protein 1	protein_coding		1.59955	2.33568	0.0195077	0.294797
WBGene00019285	173423		cbn-1	Calcium BiNding protein homolog	protein_coding	GO:0005509 (calcium ion binding)	2.08477	2.3346	0.0195645	0.29527
WBGene00010901	187463		M28.10		protein_coding		-2.2895	-2.33462	0.0195631	0.29527
WBGene00003957	177741		pcp-2	Prolyl Carboxy Peptidase like	protein_coding	GO:0016787 (hydrolase activity); GO:0006508 (proteolysis); GO:0008236 (serine-type peptidase activity); GO:0008239 (dipeptidyl-peptidase activity); GO:0045121 (membrane raft)	2.2464	2.32997	0.0198077	0.298745
WBGene00007788	175580		C28A5.1		protein_coding		-1.99484	-2.32968	0.0198231	0.298782
WBGene00012431	189432		Y11D7A.7		protein_coding		-1.87753	-2.32923	0.0198468	0.298943
WBGene00000135	174338		amt-3	Putative ammonium transporter 3	protein_coding	GO:0015696 (ammonium transport); GO:0072488 (ammonium transmembrane transport); GO:0008519 (ammonium transmembrane transporter activity); GO:0016020 (membrane)	1.97429	2.32648	0.0199931	0.300952
WBGene00007753	179663	5167	C27A7.1	Ectonucleotide pyrophosphatase/phosphodiesterase C27A7.1	protein_coding	GO:0016020 (membrane); GO:0016021 (integral component of membrane); GO:0003824 (catalytic activity); GO:0016787 (hydrolase activity)	1.74325	2.32548	0.0200465	0.301559
WBGene00005444	13217708		srh-237	Serpentine Receptor, class H	protein_coding	GO:0016020 (membrane); GO:0016021 (integral component of membrane)	1.94972	2.32483	0.0200809	0.30188
WBGene00015647	175222		C09F5.1	BRICHOS domain-containing protein C09F5.1	protein_coding	GO:0016020 (membrane); GO:0016021 (integral component of membrane)	1.65127	2.32308	0.020175	0.303098
WBGene00000797	180536		crn-4	Cell death-related nuclease 4	protein_coding	GO:0003676 (nucleic acid binding)	-1.73247	-2.31955	0.0203651	0.305754
WBGene00015969	182780		glb-6	Globin-like protein 6	protein_coding	GO:0019825 (oxygen binding); GO:0020037 (heme binding)	2.20035	2.3185	0.0204224	0.305983
WBGene00001821	180727		ham-2		protein_coding	GO:0005634 (nucleus); GO:0046872 (metal ion binding); GO:0043565 (sequence-specific DNA binding); GO:0000981 (DNA-binding transcription factor activity, RNA polymerase II-specific); GO:0006357 (regulation of transcription by RNA polymerase II); GO:0003700 (DNA-binding transcription factor activity); GO:0001709 (cell fate determination); GO:0016477 (cell migration); GO:0045664 (regulation of neuro…	1.60662	2.3186	0.0204166	0.305983
WBGene00019603	187246		K09H11.6		protein_coding	GO:0016020 (membrane); GO:0016021 (integral component of membrane)	2.74871	2.31875	0.0204085	0.305983
WBGene00045386	6418829		nlp-76	Neuropeptide-Like Protein	protein_coding	GO:0007218 (neuropeptide signaling pathway)	1.85161	2.31815	0.0204409	0.305983
WBGene00021875	177060		Y54G2A.10		protein_coding		1.87834	2.31805	0.0204465	0.305983
WBGene00002143	171930		inx-21	Innexin	protein_coding	GO:0016020 (membrane); GO:0016021 (integral component of membrane); GO:0055085 (transmembrane transport); GO:0005886 (plasma membrane); GO:0006811 (ion transport); GO:0030054 (cell junction); GO:0005921 (gap junction); GO:0005243 (gap junction channel activity)	-1.85896	-2.31757	0.0204726	0.306175
WBGene00001450	180854		flp-7	FMRFamide-like neuropeptides 7 TPMQRSSMVRF-amide 1 SPMQRSSMVRF-amide 1 SPMQRSSMVRF-amide 2 SPMQRSSMVRF-amide 3 SPMERSAMVRF-amide SPMDRSKMVRF-amide SSIDRASMVRL-amide TPMQRSSMVRF-amide 2	protein_coding	GO:0007218 (neuropeptide signaling pathway)	1.62751	2.31649	0.0205317	0.306662
WBGene00007070	179446		ugt-49	UDP-glucuronosyltransferase	protein_coding	GO:0016020 (membrane); GO:0016021 (integral component of membrane); GO:0016740 (transferase activity); GO:0043231 (intracellular membrane-bounded organelle); GO:0015020 (glucuronosyltransferase activity); GO:0016757 (transferase activity, transferring glycosyl groups); GO:0008194 (UDP-glycosyltransferase activity)	1.61373	2.31658	0.0205268	0.306662
WBGene00003749	191566		nlp-11	Neuropeptide-like peptide 11	protein_coding		1.57827	2.31559	0.0205804	0.307191
WBGene00010204	179645		F57F5.1		protein_coding	GO:0005764 (lysosome); GO:0016787 (hydrolase activity); GO:0006508 (proteolysis); GO:0008233 (peptidase activity); GO:0004197 (cysteine-type endopeptidase activity); GO:0005615 (extracellular space); GO:0008234 (cysteine-type peptidase activity); GO:0051603 (proteolysis involved in cellular protein catabolic process)	-1.76271	-2.31516	0.020604	0.307344
WBGene00002130	178101		inx-8	Innexin-8	protein_coding		-1.82556	-2.31416	0.0206589	0.307923
WBGene00021645	171921	1358	Y47G6A.19		protein_coding	GO:0016787 (hydrolase activity); GO:0046872 (metal ion binding); GO:0008270 (zinc ion binding); GO:0006508 (proteolysis); GO:0008233 (peptidase activity); GO:0008237 (metallopeptidase activity); GO:0005615 (extracellular space); GO:0004181 (metallocarboxypeptidase activity); GO:0004180 (carboxypeptidase activity)	2.18785	2.31397	0.0206694	0.307923
WBGene00016360	183174		C33G8.2		protein_coding		1.65377	2.31316	0.0207136	0.308122
WBGene00009073	184882		delm-1	DEgenerin Linked to Mechanosensation	protein_coding	GO:0016020 (membrane); GO:0016021 (integral component of membrane); GO:0006811 (ion transport); GO:0005887 (integral component of plasma membrane); GO:0005272 (sodium channel activity); GO:0006814 (sodium ion transport); GO:0035725 (sodium ion transmembrane transport); GO:0015280 (ligand-gated sodium channel activity)	3.76546	2.31335	0.0207032	0.308122
WBGene00006845	173359		unc-122		protein_coding	GO:0016020 (membrane); GO:0016021 (integral component of membrane); GO:0003674 (molecular_function); GO:0045211 (postsynaptic membrane); GO:0032223 (negative regulation of synaptic transmission, cholinergic)	-1.74493	-2.313	0.0207229	0.308122
WBGene00007925	175452		C34C12.6	CRAL-TRIO domain-containing protein C34C12.6	protein_coding		1.85283	2.31193	0.0207815	0.308776
WBGene00000401	186608		cdh-9	CaDHerin family	protein_coding	GO:0016020 (membrane); GO:0016021 (integral component of membrane); GO:0005509 (calcium ion binding); GO:0007155 (cell adhesion); GO:0098609 (cell-cell adhesion); GO:0005886 (plasma membrane); GO:0007156 (homophilic cell adhesion via plasma membrane adhesion molecules)	1.74386	2.31147	0.0208069	0.308776
WBGene00006649	181097		tth-1	Thymosin beta	protein_coding	GO:0005737 (cytoplasm); GO:0005829 (cytosol); GO:0005856 (cytoskeleton); GO:0030054 (cell junction); GO:0007015 (actin filament organization); GO:0003779 (actin binding); GO:0005938 (cell cortex); GO:0003785 (actin monomer binding)	-1.51412	-2.31166	0.0207966	0.308776
WBGene00045379	6418708		C45B11.6	Epoxide hydrolase	protein_coding	GO:0016020 (membrane); GO:0016021 (integral component of membrane); GO:0003824 (catalytic activity); GO:0016787 (hydrolase activity); GO:0005783 (endoplasmic reticulum); GO:0005789 (endoplasmic reticulum membrane); GO:0019439 (aromatic compound catabolic process); GO:0033961 (cis-stilbene-oxide hydrolase activity)	2.25586	2.30903	0.0209418	0.310579
WBGene00000977	178738		dhs-14	DeHydrogenases, Short chain	protein_coding	GO:0016491 (oxidoreductase activity); GO:0055114 (oxidation-reduction process)	-1.79433	-2.30808	0.0209946	0.310963
WBGene00004298	172728	8438	rad-54		protein_coding	GO:0005634 (nucleus); GO:0005524 (ATP binding); GO:0000166 (nucleotide binding); GO:0015616 (DNA translocase activity); GO:0007131 (reciprocal meiotic recombination); GO:0045003 (double-strand break repair via synthesis-dependent strand annealing); GO:0070615 (nucleosome-dependent ATPase activity)	-1.7546	-2.3083	0.0209826	0.310963
WBGene00271636			W05G11.8		ncRNA		1.83082	2.30754	0.0210245	0.311206
WBGene00009442	175602		F35G12.5		protein_coding		-1.93466	-2.3059	0.0211164	0.312366
WBGene00003083	172948		lst-1	Lateral Signaling Target	protein_coding	GO:0001965 (G-protein alpha-subunit binding)	-1.60938	-2.30489	0.0211729	0.313002
WBGene00020726	181754		T23C6.4		protein_coding		1.60058	2.30412	0.0212158	0.313434
WBGene00021463	189770		zeel-1		protein_coding	GO:0016020 (membrane); GO:0016021 (integral component of membrane); GO:0031462 (Cul2-RING ubiquitin ligase complex)	1.99174	2.30368	0.0212406	0.313601
WBGene00002233	180933	56479	kqt-1	KQT-1 potassium channel; Potassium channel, KvQLT family	protein_coding	GO:0016020 (membrane); GO:0016021 (integral component of membrane); GO:0005216 (ion channel activity); GO:0005886 (plasma membrane); GO:0006811 (ion transport); GO:0055085 (transmembrane transport); GO:0071805 (potassium ion transmembrane transport); GO:0005244 (voltage-gated ion channel activity); GO:0034765 (regulation of ion transmembrane transport); GO:0005249 (voltage-gated potassium channel…	1.89645	2.3027	0.0212959	0.314216
WBGene00016702	183500		C46A5.6		protein_coding		-1.72899	-2.30096	0.0213938	0.314899
WBGene00000894	174323		dab-1	DAB (Drosophila disabled) homolog	protein_coding	GO:0005737 (cytoplasm); GO:0032502 (developmental process); GO:0045807 (positive regulation of endocytosis); GO:0009792 (embryo development ending in birth or egg hatching); GO:0002119 (nematode larval development); GO:0030136 (clathrin-coated vesicle); GO:0019904 (protein domain specific binding); GO:0032050 (clathrin heavy chain binding); GO:0006898 (receptor-mediated endocytosis); GO:0008104 (…	-1.53645	-2.30124	0.0213779	0.314899
WBGene00009843	259349		F48C5.2		protein_coding	GO:0005576 (extracellular region); GO:0006508 (proteolysis); GO:0005515 (protein binding)	1.97332	2.30139	0.0213694	0.314899
WBGene00022399	179176		Y97E10AR.4		protein_coding		-1.7213	-2.30091	0.0213967	0.314899
WBGene00000282	181478	763	cah-4	Carbonic AnHydrase	protein_coding	GO:0008270 (zinc ion binding); GO:0004089 (carbonate dehydratase activity); GO:0006730 (one-carbon metabolic process); GO:0044281 (small molecule metabolic process); GO:0016836 (hydro-lyase activity)	1.74728	2.30061	0.0214136	0.314948
WBGene00003800	172813		npp-14	Nuclear pore complex protein 14	protein_coding	GO:0005515 (protein binding)	-1.53684	-2.30037	0.0214273	0.314949
WBGene00019628	175708		pup-2	Poly(U) Polymerase	protein_coding	GO:0005515 (protein binding); GO:0016779 (nucleotidyltransferase activity); GO:0031123 (RNA 3'-end processing); GO:0031054 (pre-miRNA processing); GO:0050265 (RNA uridylyltransferase activity); GO:0071076 (RNA 3' uridylation)	-1.56068	-2.29969	0.0214658	0.315114
WBGene00021600	189962		Y46H3A.4		protein_coding		1.9192	2.29973	0.0214633	0.315114
WBGene00003473	179060		mtl-1	Metallothionein-1	protein_coding		-6.3774	-2.2986	0.0215278	0.315823
WBGene00045062			Y38H8A.8		pseudogene		-4.61541	-2.29831	0.0215441	0.315862
WBGene00022893	259447		ZK1290.13		protein_coding	GO:0016020 (membrane); GO:0016021 (integral component of membrane)	-1.728	-2.29727	0.0216035	0.316532
WBGene00044544	3896849		F26F12.8		protein_coding	GO:0016020 (membrane); GO:0016021 (integral component of membrane)	1.75076	2.29688	0.0216259	0.316659
WBGene00010813	175459	57605	pitp-1	PhosphatidylInositol Transfer Protein family	protein_coding	GO:0005737 (cytoplasm); GO:0046872 (metal ion binding); GO:0035091 (phosphatidylinositol binding); GO:0015914 (phospholipid transport); GO:0005548 (phospholipid transporter activity); GO:0008525 (phosphatidylcholine transporter activity); GO:0008526 (phosphatidylinositol transfer activity); GO:0031210 (phosphatidylcholine binding); GO:0035869 (ciliary transition zone); GO:0045202 (synapse); GO:01…	1.57975	2.29523	0.02172	0.317836
WBGene00001160	175871	29904	efk-1	Eukaryotic elongation factor 2 kinase	protein_coding	GO:0004686 (elongation factor-2 kinase activity); GO:0005516 (calmodulin binding); GO:0004674 (protein serine/threonine kinase activity); GO:0006468 (protein phosphorylation); GO:0005509 (calcium ion binding); GO:0005515 (protein binding); GO:0005524 (ATP binding)	-1.52361	-2.29455	0.021759	0.318205
WBGene00007345	182267		C05E7.3		protein_coding		2.17831	2.2943	0.021773	0.318209
WBGene00000449	185853		ceh-27	C. Elegans Homeobox	protein_coding	GO:0005634 (nucleus); GO:0003677 (DNA binding); GO:0006355 (regulation of transcription, DNA-templated); GO:0000978 (RNA polymerase II cis-regulatory region sequence-specific DNA binding); GO:0000981 (DNA-binding transcription factor activity, RNA polymerase II-specific); GO:0006357 (regulation of transcription by RNA polymerase II); GO:0030154 (cell differentiation); GO:0000977 (RNA polymerase I…	1.7368	2.29134	0.0219436	0.319691
WBGene00000759	184015		col-186	COLlagen	protein_coding	GO:0042302 (structural constituent of cuticle)	2.41889	2.29196	0.0219082	0.319691
WBGene00013882	177728		msa-1	Microfilaria Surface-Associated protein	protein_coding	GO:0016020 (membrane); GO:0016021 (integral component of membrane)	1.53021	2.29135	0.0219435	0.319691
WBGene00004811	180148		skr-5	SKp1 Related (Ubiquitin ligase complex component)	protein_coding	GO:0005634 (nucleus); GO:0005737 (cytoplasm); GO:0006511 (ubiquitin-dependent protein catabolic process); GO:0016567 (protein ubiquitination); GO:0008340 (determination of adult lifespan); GO:0031146 (SCF-dependent proteasomal ubiquitin-dependent protein catabolic process); GO:0097602 (cullin family protein binding)	-2.74437	-2.29165	0.0219258	0.319691
WBGene00021909	175199		Y55B1BL.1		protein_coding		1.66696	2.29197	0.0219074	0.319691
WBGene00016738	183545		C47D2.1		protein_coding		2.12783	2.291	0.0219637	0.319781
WBGene00007809	183008		C29F4.3		protein_coding	GO:0016020 (membrane); GO:0016021 (integral component of membrane)	6.66446	2.28881	0.0220906	0.320838
WBGene00008987	179870		F20G2.3		protein_coding		1.89067	2.28879	0.0220918	0.320838
WBGene00302995	36805022		H06H21.37		protein_coding	GO:0016020 (membrane); GO:0016021 (integral component of membrane)	-1.72925	-2.28914	0.0220714	0.320838
WBGene00001820	178205		ham-1		protein_coding	GO:0005737 (cytoplasm); GO:0006357 (regulation of transcription by RNA polymerase II); GO:0055059 (asymmetric neuroblast division); GO:0051653 (spindle localization); GO:1990179 (protein localization to actomyosin contractile ring); GO:0005634 (nucleus); GO:0001709 (cell fate determination); GO:0005938 (cell cortex); GO:0045944 (positive regulation of transcription by RNA polymerase II); GO:00017…	1.63669	2.28925	0.0220651	0.320838
WBGene00007001	172024		tufm-2	Mitochondrial elongation factor Tu homologue; TU elongation Factor (EF-Tu), Mitochondrial	protein_coding	GO:0005525 (GTP binding); GO:0000166 (nucleotide binding); GO:0003924 (GTPase activity); GO:0005737 (cytoplasm); GO:0005739 (mitochondrion); GO:0006412 (translation); GO:0003746 (translation elongation factor activity); GO:0006414 (translational elongation); GO:0070125 (mitochondrial translational elongation)	-1.63632	-2.28849	0.0221093	0.32089
WBGene00013124	173003		Y52B11A.4		protein_coding	GO:0005525 (GTP binding); GO:0016020 (membrane); GO:0005886 (plasma membrane); GO:0000166 (nucleotide binding); GO:0003924 (GTPase activity); GO:0007165 (signal transduction); GO:0005246 (calcium channel regulator activity)	1.75698	2.28796	0.02214	0.320932
WBGene00022035	171640		Y65B4BL.3		protein_coding	GO:0016020 (membrane); GO:0016021 (integral component of membrane)	-2.07451	-2.28804	0.0221349	0.320932
WBGene00023501	259609		F11E6.11		protein_coding	GO:0016020 (membrane); GO:0016021 (integral component of membrane)	2.2059	2.28715	0.0221869	0.321161
WBGene00004246			puf-10		pseudogene		-1.88013	-2.28697	0.0221975	0.321161
WBGene00011831	179551		T19B10.2		protein_coding		1.57335	2.28737	0.0221739	0.321161
WBGene00014052	191387		ZK669.2		protein_coding	GO:0016491 (oxidoreductase activity)	1.93592	2.28567	0.0222738	0.322064
WBGene00011453	188073		ugt-56	Putative UDP-glucuronosyltransferase ugt-56	protein_coding	GO:0016020 (membrane); GO:0016021 (integral component of membrane); GO:0016740 (transferase activity); GO:0043231 (intracellular membrane-bounded organelle); GO:0015020 (glucuronosyltransferase activity); GO:0016757 (transferase activity, transferring glycosyl groups); GO:0008194 (UDP-glycosyltransferase activity)	3.88265	2.2844	0.022348	0.322935
WBGene00008804	174344		acp-4	ACid Phosphatase family	protein_coding	GO:0016020 (membrane); GO:0016021 (integral component of membrane); GO:0016311 (dephosphorylation); GO:0016791 (phosphatase activity)	-22.5199	-2.28384	0.0223808	0.323005
WBGene00018971	177151		clec-67	C-type LECtin	protein_coding	GO:0030246 (carbohydrate binding)	-2.44297	-2.28391	0.022377	0.323005
WBGene00018393	185709		msra-1	Methionine Sulfoxide Reductase A	protein_coding	GO:0005737 (cytoplasm); GO:0016491 (oxidoreductase activity); GO:0008113 (peptide-methionine (S)-S-oxide reductase activity); GO:0034599 (cellular response to oxidative stress); GO:0036456 (L-methionine-(S)-S-oxide reductase activity); GO:0033744 (L-methionine:thioredoxin-disulfide S-oxidoreductase activity); GO:0055114 (oxidation-reduction process)	1.7452	2.28296	0.0224325	0.323548
WBGene00015828	182658		math-14	MATH (Meprin-associated Traf homology) domain containing	protein_coding	GO:0005515 (protein binding)	-3.05441	-2.28264	0.0224516	0.323623
WBGene00086551	7040189		D2005.7		protein_coding		-1.78964	-2.28175	0.0225042	0.324178
WBGene00011713	179579		T11F9.12		protein_coding		1.59849	2.28102	0.0225475	0.324398
WBGene00044210	3565933		Y51A2D.21		protein_coding	GO:0016020 (membrane); GO:0016021 (integral component of membrane)	1.98693	2.28124	0.022534	0.324398
WBGene00009384	185259		piit-1	Protease Inhibitor I2 (Two)	protein_coding	GO:0004867 (serine-type endopeptidase inhibitor activity); GO:0010951 (negative regulation of endopeptidase activity)	1.96193	2.28071	0.0225656	0.324456
WBGene00019719	177215		M01H9.3		protein_coding		-1.50231	-2.27871	0.0226844	0.325961
WBGene00219369	13220270		R160.10		protein_coding	GO:0016020 (membrane); GO:0016021 (integral component of membrane)	-4.07358	-2.27701	0.0227855	0.32721
WBGene00010796	176307		clip-1	CAP-Gly domain-containing linker protein 1 homolog	protein_coding		1.54761	2.27587	0.0228541	0.327991
WBGene00003751	178826		nlp-13	Neuropeptide-Like Protein	protein_coding	GO:0007218 (neuropeptide signaling pathway)	1.53789	2.27421	0.0229533	0.329212
WBGene00016845	177554		C50F7.5		protein_coding		1.81199	2.27385	0.0229749	0.329316
WBGene00008052	174308	1497	ctns-1	Cystinosin homolog	protein_coding		-1.51901	-2.27323	0.023012	0.329467
WBGene00013035	176669		Y49E10.16		protein_coding	GO:0006629 (lipid metabolic process)	-1.56974	-2.2732	0.023014	0.329467
WBGene00008607	181605		F09B12.3	Putative phospholipase B-like 2	protein_coding	GO:0016787 (hydrolase activity); GO:0005576 (extracellular region); GO:0006629 (lipid metabolic process); GO:0016042 (lipid catabolic process); GO:0004620 (phospholipase activity); GO:0009395 (phospholipid catabolic process)	-1.70392	-2.27279	0.0230386	0.329617
WBGene00004264	174319		qua-1		protein_coding	GO:0016539 (intein-mediated protein splicing); GO:0016540 (protein autoprocessing); GO:0007275 (multicellular organism development); GO:0007267 (cell-cell signaling)	2.09952	2.27207	0.0230824	0.330039
WBGene00022599	175727		daf-41	Co-chaperone protein daf-41	protein_coding		-1.51493	-2.27102	0.023146	0.330547
WBGene00018538	180665		marg-1	Pharyngeal MARGginal cell marker	protein_coding		1.99764	2.27101	0.0231466	0.330547
WBGene00007455	178330		ugt-22	UDP-glucuronosyltransferase	protein_coding	GO:0016020 (membrane); GO:0016021 (integral component of membrane); GO:0016740 (transferase activity); GO:0043231 (intracellular membrane-bounded organelle); GO:0015020 (glucuronosyltransferase activity); GO:0016757 (transferase activity, transferring glycosyl groups); GO:0008194 (UDP-glycosyltransferase activity)	1.77918	2.26971	0.0232253	0.331466
WBGene00015146	175789		abi-1	ABl Interactor homolog	protein_coding	GO:0098793 (presynapse); GO:0005515 (protein binding); GO:0017124 (SH3 domain binding); GO:0097091 (synaptic vesicle clustering); GO:2000370 (positive regulation of clathrin-dependent endocytosis); GO:0099140 (presynaptic actin cytoskeleton organization); GO:0019901 (protein kinase binding); GO:0043025 (neuronal cell body); GO:0005737 (cytoplasm); GO:0016477 (cell migration); GO:0030424 (axon); G…	-1.55294	-2.26915	0.0232591	0.331744
WBGene00009796	185875		F46G10.1		protein_coding	GO:0005515 (protein binding); GO:0051260 (protein homooligomerization)	-1.55247	-2.268	0.0233293	0.332129
WBGene00019075	186575		F59A3.2		protein_coding		-1.74814	-2.2683	0.0233111	0.332129
WBGene00003647	178813		nhr-57	Nuclear hormone receptor family member nhr-57	protein_coding	GO:0043565 (sequence-specific DNA binding); GO:0003700 (DNA-binding transcription factor activity); GO:0008270 (zinc ion binding); GO:0006355 (regulation of transcription, DNA-templated)	-1.70175	-2.26802	0.023328	0.332129
WBGene00011054	175022		arrd-13	ARRestin Domain protein	protein_coding	GO:0005737 (cytoplasm); GO:0015031 (protein transport)	-1.64718	-2.26702	0.0233891	0.332367
WBGene00002915	175384		let-805	Myotactin form A	protein_coding	GO:0016020 (membrane); GO:0016021 (integral component of membrane); GO:0019221 (cytokine-mediated signaling pathway); GO:0043235 (receptor complex); GO:0009897 (external side of plasma membrane); GO:0030056 (hemidesmosome); GO:0004896 (cytokine receptor activity); GO:0019955 (cytokine binding); GO:0005515 (protein binding); GO:0031581 (hemidesmosome assembly)	1.58176	2.26703	0.0233881	0.332367
WBGene00003730	174242		nhx-2	Na(+)/H(+) exchanger protein 2	protein_coding	GO:0015299 (solute:proton antiporter activity); GO:0006812 (cation transport); GO:0006885 (regulation of pH); GO:0015385 (sodium:proton antiporter activity); GO:0006814 (sodium ion transport); GO:0016021 (integral component of membrane); GO:0055085 (transmembrane transport)	1.60554	2.26742	0.0233643	0.332367
WBGene00009830	179565		cutl-18	CUTiclin-Like	protein_coding	GO:0016020 (membrane); GO:0016021 (integral component of membrane)	2.14418	2.2664	0.0234272	0.332499
WBGene00001714	178837		grl-5	GRound-Like (Grd related)	protein_coding		14.6691	2.26649	0.0234211	0.332499
WBGene00010732	172838		K10C3.5		protein_coding	GO:0003924 (GTPase activity); GO:0005525 (GTP binding); GO:0043022 (ribosome binding); GO:1990904 (ribonucleoprotein complex); GO:0042256 (mature ribosome assembly)	-1.59806	-2.266	0.0234513	0.332637
WBGene00006656	192072		twk-1	TWiK family of potassium channels	protein_coding	GO:0071805 (potassium ion transmembrane transport); GO:0005267 (potassium channel activity); GO:0016020 (membrane); GO:0016021 (integral component of membrane); GO:0006811 (ion transport); GO:0005887 (integral component of plasma membrane); GO:0022841 (potassium ion leak channel activity); GO:0030322 (stabilization of membrane potential)	1.57677	2.26575	0.0234668	0.332652
WBGene00020563	188587		T19C3.5		protein_coding	GO:0005615 (extracellular space); GO:0008289 (lipid binding)	-1.68784	-2.26441	0.0235487	0.333608
WBGene00012185	180351		W01F3.2		protein_coding	GO:0004222 (metalloendopeptidase activity); GO:0005615 (extracellular space); GO:0030198 (extracellular matrix organization); GO:0030574 (collagen catabolic process); GO:0006508 (proteolysis)	1.75684	2.2641	0.0235679	0.333677
WBGene00018288	185618		F41E6.7		protein_coding		2.0292	2.26355	0.0236015	0.333948
WBGene00022349	259490		Y82E9BR.17		protein_coding		1.73069	2.26272	0.0236528	0.334468
WBGene00017450	173679		bath-27	BTB and MATH domain containing	protein_coding	GO:0005515 (protein binding)	-2.05946	-2.26242	0.0236717	0.334524
WBGene00008410	179618	57143	D2023.6		protein_coding	GO:0005743 (mitochondrial inner membrane); GO:0007005 (mitochondrion organization); GO:0055088 (lipid homeostasis); GO:0032592 (integral component of mitochondrial membrane)	-1.59082	-2.26204	0.0236948	0.334524
WBGene00001184	181291	2261	egl-15	Myoblast growth factor receptor egl-15	protein_coding	GO:0004713 (protein tyrosine kinase activity); GO:0004672 (protein kinase activity); GO:0006468 (protein phosphorylation); GO:0005524 (ATP binding); GO:0016020 (membrane); GO:0016021 (integral component of membrane); GO:0016301 (kinase activity); GO:0016310 (phosphorylation); GO:0000166 (nucleotide binding); GO:0018108 (peptidyl-tyrosine phosphorylation); GO:0004714 (transmembrane receptor protei…	1.58706	2.26196	0.0237002	0.334524
WBGene00009089	181543		jmjd-3.2	JuMonJi (Transcription factor) Domain protein	protein_coding	GO:0005634 (nucleus); GO:0000978 (RNA polymerase II cis-regulatory region sequence-specific DNA binding); GO:0031490 (chromatin DNA binding); GO:0044666 (MLL3/4 complex); GO:0071558 (histone demethylase activity (H3-K27 specific)); GO:0010468 (regulation of gene expression); GO:0071557 (histone H3-K27 demethylation)	1.95233	2.26092	0.0237644	0.335152
WBGene00004296	179678		rad-50	DNA repair protein rad-50	protein_coding	GO:0000723 (telomere maintenance); GO:0016887 (ATPase activity); GO:0030870 (Mre11 complex); GO:0006281 (DNA repair); GO:0005634 (nucleus); GO:0046872 (metal ion binding); GO:0000166 (nucleotide binding); GO:0005524 (ATP binding)	-1.52531	-2.26077	0.0237737	0.335152
WBGene00185086	13180284		F59A3.12		protein_coding		-1.72723	-2.25979	0.0238341	0.335537
WBGene00017813	184956		nlp-61	Neuropeptide-Like Protein	protein_coding	GO:0007218 (neuropeptide signaling pathway)	1.58281	2.2597	0.0238401	0.335537
WBGene00021883	177072	10134	Y54G2A.18	4D656	protein_coding	GO:0016020 (membrane); GO:0016021 (integral component of membrane); GO:0006886 (intracellular protein transport); GO:0015031 (protein transport); GO:0016192 (vesicle-mediated transport); GO:0005789 (endoplasmic reticulum membrane); GO:0006888 (endoplasmic reticulum to Golgi vesicle-mediated transport); GO:0005783 (endoplasmic reticulum); GO:0070973 (protein localization to endoplasmic reticulum e…	-1.53302	-2.25939	0.023859	0.335537
WBGene00022562	173536		ZC204.12		protein_coding		-1.70551	-2.2595	0.0238521	0.335537
WBGene00007984	172789		irx-1	Putative iroquois-class homeodomain protein irx-1	protein_coding	GO:0000981 (DNA-binding transcription factor activity, RNA polymerase II-specific); GO:0005634 (nucleus); GO:0006355 (regulation of transcription, DNA-templated); GO:0003677 (DNA binding)	1.56263	2.25808	0.0239404	0.336476
WBGene00189950	13188680		C39B5.14		protein_coding	GO:0006629 (lipid metabolic process)	-4.69804	-2.25652	0.0240379	0.337231
WBGene00019840	187531		R02F11.2		protein_coding	GO:0016020 (membrane); GO:0016021 (integral component of membrane)	2.12343	2.25687	0.0240162	0.337231
WBGene00018830	175785		ska-3	Spindle and Kinetochore-Associated protein homolog	protein_coding		-1.67041	-2.2567	0.0240265	0.337231
WBGene00022038	190487		Y65B4BL.6		protein_coding		3.3965	2.25622	0.0240566	0.337288
WBGene00000501	178274	60482	cho-1	High-affinity choline transporter 1	protein_coding	GO:0016020 (membrane); GO:0016021 (integral component of membrane); GO:0006811 (ion transport); GO:0005886 (plasma membrane); GO:0022857 (transmembrane transporter activity); GO:0055085 (transmembrane transport); GO:0006814 (sodium ion transport); GO:0015293 (symporter activity); GO:0005307 (choline:sodium symporter activity); GO:0008292 (acetylcholine biosynthetic process); GO:0015220 (choline t…	1.67299	2.25565	0.0240926	0.337553
WBGene00011495	172811	158046	T05F1.11		protein_coding		-1.9282	-2.25546	0.0241047	0.337553
WBGene00000098	179202		air-1	Aurora/Ipl1 Related kinase; Aurora/Ipl1-related protein kinase 1	protein_coding	GO:0005524 (ATP binding); GO:0004672 (protein kinase activity); GO:0006468 (protein phosphorylation); GO:0016301 (kinase activity); GO:0016310 (phosphorylation); GO:0000166 (nucleotide binding); GO:0016740 (transferase activity); GO:0004674 (protein serine/threonine kinase activity); GO:0005515 (protein binding); GO:0007052 (mitotic spindle organization); GO:0005876 (spindle microtubule); GO:0031…	-1.60409	-2.25401	0.0241955	0.338619
WBGene00010755	176441		vglu-2	Vesicular GLUtamate transporter	protein_coding	GO:0016020 (membrane); GO:0016021 (integral component of membrane); GO:0022857 (transmembrane transporter activity); GO:0055085 (transmembrane transport); GO:0035249 (synaptic transmission, glutamatergic); GO:0005313 (L-glutamate transmembrane transporter activity); GO:0005326 (neurotransmitter transmembrane transporter activity); GO:0015813 (L-glutamate transmembrane transport); GO:0030285 (inte…	1.69359	2.25305	0.024256	0.339261
WBGene00000372	188362	100861540	cyp-13A7	Putative cytochrome P450 CYP13A7	protein_coding	GO:0016705 (oxidoreductase activity, acting on paired donors, with incorporation or reduction of molecular oxygen); GO:0005506 (iron ion binding); GO:0020037 (heme binding); GO:0055114 (oxidation-reduction process)	-6.4045	-2.2509	0.0243918	0.340954
WBGene00022713	191298		ZK355.3		protein_coding		-9.29084	-2.24962	0.0244729	0.341881
WBGene00011908	172950		pash-1	PArtner of DroSHa (DRSH-1 interactor)	protein_coding	GO:0003723 (RNA binding); GO:0020037 (heme binding); GO:0003725 (double-stranded RNA binding); GO:0031053 (primary miRNA processing); GO:0042802 (identical protein binding); GO:0070877 (microprocessor complex); GO:0070878 (primary miRNA binding); GO:0040028 (regulation of vulval development); GO:0040034 (regulation of development, heterochronic); GO:0045604 (regulation of epidermal cell different…	-1.66216	-2.24897	0.0245143	0.342253
WBGene00016592	178178	11160	erl-1	ERLin (ER lipid raft associated protein) homolog	protein_coding	GO:0016020 (membrane); GO:0016021 (integral component of membrane); GO:0005789 (endoplasmic reticulum membrane); GO:0031625 (ubiquitin protein ligase binding); GO:0005783 (endoplasmic reticulum); GO:0015485 (cholesterol binding); GO:0032933 (SREBP signaling pathway); GO:0032991 (protein-containing complex)	-1.72438	-2.24843	0.0245486	0.342525
WBGene00008693	184342	60526	F11C1.4		protein_coding	GO:0016787 (hydrolase activity); GO:0005811 (lipid droplet); GO:0019915 (lipid storage)	2.73368	2.24806	0.0245726	0.342652
WBGene00013353	190398		Y59A8B.21		protein_coding	GO:0016020 (membrane); GO:0016021 (integral component of membrane); GO:0022857 (transmembrane transporter activity); GO:0055085 (transmembrane transport)	-1.77816	-2.24728	0.0246222	0.343136
WBGene00004130	178740		ketn-1	KETtiN (Drosophila actin-binding) homolog; Kettin	protein_coding	GO:0051015 (actin filament binding); GO:0006936 (muscle contraction); GO:0031430 (M band); GO:0031674 (I band)	1.62129	2.24454	0.0247978	0.345168
WBGene00022720	191302		ZK370.6		protein_coding		1.95419	2.24466	0.0247903	0.345168
WBGene00017907	185078		F28F9.3		protein_coding		2.09446	2.24392	0.0248378	0.345458
WBGene00003633	178121		nhr-43	Nuclear Hormone Receptor family	protein_coding	GO:0005634 (nucleus); GO:0003677 (DNA binding); GO:0046872 (metal ion binding); GO:0003700 (DNA-binding transcription factor activity); GO:0006355 (regulation of transcription, DNA-templated); GO:0008270 (zinc ion binding); GO:0043565 (sequence-specific DNA binding); GO:0030522 (intracellular receptor signaling pathway); GO:0006357 (regulation of transcription by RNA polymerase II); GO:0000977 (R…	1.8537	2.24375	0.0248486	0.345458
WBGene00010608	187080		K07A1.1		protein_coding	GO:0016020 (membrane); GO:0016021 (integral component of membrane)	-1.69344	-2.2432	0.0248836	0.34553
WBGene00004002	181277		pgp-8	p-GlycoProtein related	protein_coding	GO:0016020 (membrane); GO:0016021 (integral component of membrane); GO:0005524 (ATP binding); GO:0042626 (ATPase-coupled transmembrane transporter activity); GO:0000166 (nucleotide binding); GO:0055085 (transmembrane transport); GO:0016887 (ATPase activity); GO:0008559 (ATPase-coupled xenobiotic transmembrane transporter activity); GO:0042908 (xenobiotic transport)	4.67264	2.2433	0.0248773	0.34553
WBGene00000155	172118	7511	app-1	Xaa-Pro aminopeptidase app-1	protein_coding	GO:0016787 (hydrolase activity); GO:0046872 (metal ion binding); GO:0005737 (cytoplasm); GO:0006508 (proteolysis); GO:0008233 (peptidase activity); GO:0008270 (zinc ion binding); GO:0070006 (metalloaminopeptidase activity); GO:0004177 (aminopeptidase activity); GO:0042803 (protein homodimerization activity)	-1.52316	-2.24231	0.0249414	0.346123
WBGene00001491	172189		frm-4	FERM domain (Protein4.1-ezrin-radixin-moesin) family	protein_coding	GO:0016020 (membrane); GO:0016021 (integral component of membrane); GO:0005856 (cytoskeleton); GO:0031032 (actomyosin structure organization)	-1.49718	-2.24146	0.0249963	0.346677
WBGene00015519	182313	90527	doxa-1	Dual oxidase maturation factor 1	protein_coding	GO:0005789 (endoplasmic reticulum membrane); GO:0015031 (protein transport); GO:0016021 (integral component of membrane)	2.04924	2.24042	0.025064	0.347407
WBGene00020833	177096		T26C12.3		protein_coding	GO:0003924 (GTPase activity); GO:0005525 (GTP binding); GO:0016020 (membrane); GO:0005886 (plasma membrane); GO:0046872 (metal ion binding); GO:0000166 (nucleotide binding); GO:0007165 (signal transduction); GO:0007265 (Ras protein signal transduction); GO:0019003 (GDP binding)	1.7979	2.23887	0.0251647	0.348594
WBGene00021114	172083		W09C3.7		protein_coding		-1.89628	-2.23862	0.0251807	0.348607
WBGene00019127	174001	7357	cgt-3	Ceramide glucosyltransferase 3	protein_coding	GO:0016757 (transferase activity, transferring glycosyl groups)	-1.53461	-2.23723	0.025271	0.349648
WBGene00016568	180839		C41G11.1		protein_coding	GO:0016787 (hydrolase activity)	-1.58247	-2.23641	0.0253246	0.349971
WBGene00008741	174802	5476	F13D12.6	Uncharacterized serine carboxypeptidase F13S12.6	protein_coding	GO:0016787 (hydrolase activity); GO:0006508 (proteolysis); GO:0008233 (peptidase activity); GO:0004185 (serine-type carboxypeptidase activity); GO:0004180 (carboxypeptidase activity)	-1.58502	-2.23652	0.0253179	0.349971
WBGene00009543	259587		F38E11.6		protein_coding	GO:0005524 (ATP binding); GO:0005737 (cytoplasm); GO:0016301 (kinase activity); GO:0016310 (phosphorylation); GO:0016740 (transferase activity); GO:0005739 (mitochondrion); GO:0006139 (nucleobase-containing compound metabolic process); GO:0019205 (nucleobase-containing compound kinase activity); GO:0046940 (nucleoside monophosphate phosphorylation); GO:0004017 (adenylate kinase activity)	1.83255	2.23464	0.025441	0.351368
WBGene00012341	177822	79572	catp-6	Probable cation-transporting ATPase W08D2.5	protein_coding	GO:0016020 (membrane); GO:0016021 (integral component of membrane); GO:0005524 (ATP binding); GO:0000166 (nucleotide binding); GO:0046872 (metal ion binding); GO:0034220 (ion transmembrane transport); GO:0098655 (cation transmembrane transport); GO:0016887 (ATPase activity); GO:0006812 (cation transport); GO:0006874 (cellular calcium ion homeostasis); GO:0019829 (ATPase-coupled cation transmembra…	-1.53012	-2.23342	0.0255211	0.351634
WBGene00002068	173872		ify-1	Securin-like protein	protein_coding		-1.61492	-2.2335	0.0255163	0.351634
WBGene00017328	175204		nemp-1	Nuclear Envelope integral Membrane Protein homolog	protein_coding	GO:0016020 (membrane); GO:0016021 (integral component of membrane); GO:0005635 (nuclear envelope); GO:0005637 (nuclear inner membrane)	-1.55772	-2.23366	0.0255053	0.351634
WBGene00011464	174718		T05B9.1		protein_coding		-1.56376	-2.23377	0.025498	0.351634
WBGene00010545	186960		cbp-2	CBP/p300 homolog	protein_coding	GO:0005634 (nucleus); GO:0046872 (metal ion binding); GO:0006355 (regulation of transcription, DNA-templated); GO:0003712 (transcription coregulator activity)	-1.71217	-2.23153	0.0256459	0.353144
WBGene00011287	179767		glb-24	GLoBin related	protein_coding	GO:0019825 (oxygen binding); GO:0020037 (heme binding)	1.78008	2.23052	0.0257129	0.353747
WBGene00011554	188207		T07A5.1		protein_coding	GO:0016020 (membrane); GO:0016021 (integral component of membrane)	2.87531	2.23041	0.0257204	0.353747
WBGene00019064	179190	57644	myo-5	MYOsin heavy chain structural genes	protein_coding	GO:0005524 (ATP binding); GO:0000166 (nucleotide binding); GO:0005737 (cytoplasm); GO:0003774 (motor activity); GO:0051015 (actin filament binding); GO:0003779 (actin binding); GO:0016459 (myosin complex); GO:0030016 (myofibril); GO:0032982 (myosin filament)	1.77565	2.22926	0.0257967	0.354586
WBGene00022240	177400	3751	shl-1	SHaL family of potassium channels	protein_coding	GO:0016020 (membrane); GO:0016021 (integral component of membrane); GO:0005216 (ion channel activity); GO:0006811 (ion transport); GO:0055085 (transmembrane transport); GO:0071805 (potassium ion transmembrane transport); GO:0005244 (voltage-gated ion channel activity); GO:0034765 (regulation of ion transmembrane transport); GO:0005249 (voltage-gated potassium channel activity); GO:0005267 (potass…	1.79245	2.22896	0.0258164	0.354645
WBGene00011424	188051		dhs-31	DeHydrogenases, Short chain	protein_coding	GO:0016491 (oxidoreductase activity); GO:0055114 (oxidation-reduction process)	1.84038	2.2257	0.0260345	0.357004
WBGene00004208	174274	5727	ptc-1		protein_coding	GO:0016021 (integral component of membrane)	-1.49037	-2.22583	0.0260257	0.357004
WBGene00018283	181094	375611	sulp-3	Sulfate permease family protein 3	protein_coding	GO:0016020 (membrane); GO:0016021 (integral component of membrane); GO:0055085 (transmembrane transport); GO:1902476 (chloride transmembrane transport); GO:0005887 (integral component of plasma membrane); GO:0008271 (secondary active sulfate transmembrane transporter activity); GO:0008272 (sulfate transport); GO:0015106 (bicarbonate transmembrane transporter activity); GO:0015108 (chloride transm…	3.43921	2.22599	0.026015	0.357004
WBGene00015842	182671		C16C8.4		protein_coding	GO:0005634 (nucleus); GO:0005737 (cytoplasm); GO:0016567 (protein ubiquitination); GO:0031625 (ubiquitin protein ligase binding); GO:0019941 (modification-dependent protein catabolic process); GO:0031386 (protein tag); GO:0005515 (protein binding)	-1.8966	-2.22498	0.0260824	0.35745
WBGene00011408	175614		nifk-1	NIFK homolog	protein_coding	GO:0003723 (RNA binding); GO:0003676 (nucleic acid binding); GO:0005730 (nucleolus); GO:0000463 (maturation of LSU-rRNA from tricistronic rRNA transcript (SSU-rRNA, 5.8S rRNA, LSU-rRNA))	-1.57492	-2.22463	0.026106	0.357561
WBGene00007958	183231		C35C5.9		protein_coding		1.5859	2.22379	0.0261624	0.357697
WBGene00003607	177551		nhr-8	Nuclear hormone receptor family member nhr-8	protein_coding	GO:0043565 (sequence-specific DNA binding); GO:0003700 (DNA-binding transcription factor activity); GO:0008270 (zinc ion binding); GO:0006355 (regulation of transcription, DNA-templated)	-1.64867	-2.22395	0.0261521	0.357697
WBGene00009245	3565035		rict-1		protein_coding	GO:0051897 (positive regulation of protein kinase B signaling); GO:0031929 (TOR signaling); GO:0031932 (TORC2 complex); GO:0038203 (TORC2 signaling); GO:0048382 (mesendoderm development); GO:0043539 (protein serine/threonine kinase activator activity); GO:0071902 (positive regulation of protein serine/threonine kinase activity)	-1.53486	-2.22401	0.026148	0.357697
WBGene00001016	174809	1763	dna-2	Yeast DNA helicase/endonuclease family	protein_coding	GO:0005737 (cytoplasm); GO:0004386 (helicase activity); GO:0003723 (RNA binding); GO:0032508 (DNA duplex unwinding); GO:0017108 (5'-flap endonuclease activity); GO:0071932 (replication fork reversal); GO:0005634 (nucleus); GO:0017116 (single-stranded DNA helicase activity); GO:0006259 (DNA metabolic process); GO:0000014 (single-stranded DNA endodeoxyribonuclease activity); GO:0043139 (5'-3' DNA h…	-1.66207	-2.22345	0.0261857	0.357803
[truncated: 18,597 more rows]

## Sheet: DEGs_2Fold_UP_Regulated
							ogt-1 KO vs WT
Ensembl Gene ID	Nematode Entrez Gene ID(s)	Human Entrez Gene ID(s)	Symbol	Description	Biotype	GO Term(s)	fold change	Wald statistic	p	FDR q (all)
[truncated: 4,603 more rows]

## Sheet: DEGs_2F_Down_Regulated
							ogt-1 KO vs WT
[truncated: 2,685 more rows]

[truncated: 2 more sheets: GO_Enrichment_2F_UP_TOP30, GO_Enrichment_2F_Down_TOP30]
