# Supplementary material for: O-GlcNAc signaling increases neuron regeneration through one-carbon metabolism in Caenorhabditis elegans
Source: eLife. 2024 Feb 9;13:e86478. doi: 10.7554/eLife.86478 (PMC10857789; doi:10.7554/eLife.86478)
Supplement: Figure 3—figure supplement 1—source data 1. [file elife-86478-fig3-figsupp1-data1.xlsx]

## Sheet: Sheet1
WT_NGM	OGT-1_NGM	OGT-1_akt-1(mg144)	OGT-1_akt-1(mg144)_NCT502	OGT-1_akt-1(-)_NGM	OGT-1_akt-1(-)_Serine
31.04	211.29	168.51	145.6	72.09	115.5
19.46	204.43	132.77	92.23	188.71	125.97
82.61	192.08	165.23	142.85	164.97	258.29
80.47	214.68	172.55	108.33	148.7	92.77
158.06	131.31	138.53	56.42	121.07	119.83
154.34	176.23	160.93	142.72	126.39	150.4
162.9	105.64	118.46	154.87	187.76	165.13
72.86	211.7	177.17	180.07	117.91	210.73
57.38	154.81	245.07	80.39	162.31	151.75
93.08	98.26	264.77	164.53	220.4	185.99
55.72	167.11	158.5	214.08	173.33	128.28
70.99	170.49	178.51	196.22	189.3	189.24
95.97	215.64	122.77	201.72	92.79	169.35
163.06	117.12	165.23	120.68	193.16	137.74
178.73	159.47	182.55	145.6	123.43	157.7
109.27	189.71	168.53	112.23	98.03	131.64
182.22	188.77	163.93	122.85	168.93	260.09
151.66	211.89	118.46	108.33	162.37	261.68
161.92	220.3	187.17	76.42	133.98	185.56
167.89	224.21	235.07	132.72	184.78
85.07	203	274.77	164.87	159.84
103.65	294.56	178.5	160.07	101.66
93.74	136.56		100.39	121.99
128.65	304.76			192.06
185.84	226.69
142.78	199.38
223.09	151.94
86.98	194.43
181.9	189.51
215.64	143.4
193.29	268.54
	230.59
	138.86
	220.23
	168.95
N=31	N=35	N=22	N=23	N=24	N=20
