# Supplementary material for: O-GlcNAc signaling increases neuron regeneration through one-carbon metabolism in Caenorhabditis elegans
Source: eLife. 2024 Feb 9;13:e86478. doi: 10.7554/eLife.86478 (PMC10857789; doi:10.7554/eLife.86478)
Supplement: Figure 3—figure supplement 1—source data 2. [file elife-86478-fig3-figsupp1-data2.xlsx]

## Sheet: Sheet1
WT_NGM	OGT-1_NGM	WT_C31C9.2_RNAi	OGT-1_C31C9.2_RNAi
31.04	211.29	142.22	169.56
19.46	204.43	101.17	175.67
82.61	192.08	231.75	168.4
80.47	214.68	126.91	184.28
158.06	131.31	193.04	178.01
154.34	176.23	187.41	260.62
162.9	105.64	216.86	217.85
72.86	211.7	83.03	163.55
57.38	154.81	212.59	227.92
93.08	98.26	189.62	123.46
55.72	167.11	132.02	148.89
70.99	170.49	161.33	284.23
95.97	215.64	109.02	243.83
163.06	117.12	187.45	190.63
178.73	159.47	180.49	226.71
109.27	189.71	232.16	189.16
182.22	188.77	178.2	195.54
151.66	211.89	153.25	246.76
161.92	220.3	49.55	158.21
167.89	224.21	236.01	292.21
85.07	203	191.4	167.87
103.65	294.56	115.03	195.06
93.74	136.56	183.34	225.9
128.65	304.76	183.45	200.07
185.84	226.69	215.45	225.4
142.78	199.38	80.14	171.08
223.09	151.94	141.34	195.86
86.98	194.43	119.83	188.22
181.9	189.51	227.51	155.95
215.64	143.4	189.28	189.47
193.29	268.54	274.58	173.14
	230.59	156.17	219.59
	138.86	132.76	187.09
	220.23	135.94	209.48
	168.95	144.6	133.98
		303.12	247.01
			164.39
N=31	N=35	N=36	N=37
