# Supplementary material for: O-GlcNAc signaling increases neuron regeneration through one-carbon metabolism in Caenorhabditis elegans
Source: eLife. 2024 Feb 9;13:e86478. doi: 10.7554/eLife.86478 (PMC10857789; doi:10.7554/eLife.86478)
Supplement: Figure 3—figure supplement 1—source data 3. [file elife-86478-fig3-figsupp1-data3.xlsx]

## Sheet: Sheet1
WT_NGM	WT_25uM_Meth	WT_75uM_Meth	WT_150uM_Meth
31.04	181.13	274.8	124.81
19.46	240.86	158.87	142.24
82.61	104.29	163.48	290.98
80.47	90.03	209.1	168.48
158.06	235.75	135.83	100.58
154.34	71.55	122.18	233.49
162.9	136.39	173.02	142.35
72.86	176.98	216.53	181.55
57.38	116.61	175.81	168.18
93.08	219.87	159.62	70.16
55.72	156.18	108.57	77.24
70.99	126.99	121.62	105.98
95.97	112.64	240.82	226.72
163.06	95.17	244.65	152.77
178.73	59.42	132.45	195.37
109.27	178.27	138.83	130.15
182.22	154.32	244.68	102.34
151.66	122.5	177.3	121.28
161.92	191.8	207.52	192.12
167.89	206.54	199.05	204.22
85.07	207.77	206.6	81.43
103.65	155.27	130	162.12
93.74	132.87	187.88	158.2
128.65	152.49	232.62	174.04
185.84	107.59	117.42	202.19
142.78	198.43	171.23	140.51
223.09	180.69	145.43	255.07
86.98	173.41	139.04	83.78
181.9	229.15	194.61	89.6
215.64	193.02	116.25	176.99
193.29	154.52	307.62	62.31
	146.5	202.22	127.67
	115.95	204.6	224.66
	129.58	178.05	135.89
	156.34	192.9
	93.67
	141.95
	260.17
N=31	N=38	N=35	N=34
