# Supplementary material for: O-GlcNAc signaling increases neuron regeneration through one-carbon metabolism in Caenorhabditis elegans
Source: eLife. 2024 Feb 9;13:e86478. doi: 10.7554/eLife.86478 (PMC10857789; doi:10.7554/eLife.86478)
Supplement: Figure 3—source data 1. [file elife-86478-fig3-data1.xlsx]

## Sheet: Fig3B
WT_NGM	OGT-1_NGM	WT_NCT502	OGT-1_NCT502	WT_NCT502+L-Serine	OGT-1_NCT502+L-Serine
31.04	211.29	94.78	82.25	254.08	124.54
19.46	204.43	147.12	58.69	174.87	260.25
82.61	192.08	156.73	103.75	216.28	241.56
80.47	214.68	99.71	100.66	201.28	108.94
158.06	131.31	182.89	64.77	105.4	269.09
154.34	176.23	169.51	104.96	160.13	214.51
162.9	105.64	154.54	105.73	178.36	103.85
72.86	211.7	184.38	96.84	230.41	160.12
57.38	154.81	157.12	126.94	288.69	206.64
93.08	98.26	195.37	67.58	145.36	265.46
55.72	167.11	249.24	167.33	206.34	100.77
70.99	170.49	179.82	59.49	295.83	294.89
95.97	215.64	165.68	141.2	155.8	253.23
163.06	117.12	169.77	128.97	159.76	230.32
178.73	159.47	207.64	87.06	169.77	191.57
109.27	189.71	197.32	101.47	203.41	95.04
182.22	188.77	90.74	186.61	149.41	97.29
151.66	211.89	181.05	172.32	187.23	132.21
161.92	220.3	86.66	173.02	220.96	265.03
167.89	224.21	213.19	83.09	190.14	132.47
85.07	203	242.18	150.9	224.85	190.76
103.65	294.56	130.32	164.58		180.24
93.74	136.56	209.38	165.45		273.67
128.65	304.76		171.08		203.87
185.84	226.69		109.12
142.78	199.38		98.01
223.09	151.94		54.7
86.98	194.43		93.68
181.9	189.51		95.31
215.64	143.4		148.14
193.29	268.54		201.01
	230.59		96.61
	138.86		125.26
	220.23		118.68
	168.95		169.6
			136.48
			77.17
			204.57
N=31	N=35	N=23	N=8	N=21	N=24

## Sheet: Fig3C
TU_RNAi_Cntrl	OGT-1_TU_RNAi_Cntrl	TU_C31C9.2_RNAi	OGT-1_TU_C31C9.2_RNAi
80.02	165.22	281.09	173.91
106.67	131.14	138.94	51.01
89.1	142.83	150.98	142.25
46.78	147.53	175.55	160.15
96.38	167.78	249.52	111.04
102.05	119.04	138.26	56.73
71.48	89.31	284.7	157.1
66.52	189.82	243.46	153.64
94.4	223.61	265.5	132.76
116.56	168.33	278.98	121.22
112.33	117.45	145.1	162.46
60.14	129.9	244.02	169.72
134.16	139.5	220.16	140.6
106.33	112.19	177.14	109.05
71.43	216.76	271.19	80.2
61.24	205.13	139.39	120.29
69.86	205.36	221.32
80.2	206.76	269.39
62.49	136.32	167.49
172.73	214.62
115.27	137.19
172.22	132.82
151.66	142.25
161.92	173.55
157.89	233.71
95.07	125.79
103.65	125.94
103.74	194.33
126.65	121.81
N=29	N=29	N=19	N=16

## Sheet: Fig3E
WT_NGM	OGT-1_NGM	OGT-1_sams-1	OGT-1_metr-1	SAMS-1_zdis-5	METR-1_zdis-5
31.04	211.29	30.88	231.03	62.9	182.41
19.46	204.43	45.82	126.74	55.25	122.34
82.61	192.08	128.65	207.96	132.34	116.59
80.47	214.68	135.07	144	126.12	119.2
158.06	131.31	111.78	112.94	133.06	177.51
154.34	176.23	165.42	120.08	138.96	183.45
162.9	105.64	89.73	85.33	55.88	107.49
72.86	211.7	73.28	144.71	83.04	207.43
57.38	154.81	92.1	167.43	174.63	129.29
93.08	98.26	30.16	182.78	216.25	176.07
55.72	167.11	33.15	200.53	89.39	144.4
70.99	170.49	86.26	95.03	185.97	87.69
95.97	215.64	148.71	121.3	87.87	162.93
163.06	117.12	134.17	174.49	139.84	181.1
178.73	159.47	70.58	177.18	155.55	124.04
109.27	189.71	127.13	152.69	147.14	142.74
182.22	188.77	42.3	145.6	80.85	142.23
151.66	211.89	140.48	225.14	120.61	228.29
161.92	220.3	53.33	202.1	83.22	107.49
167.89	224.21	55.35	128.9	90.12	140.46
85.07	203	39.06	84.36
103.65	294.56	107.55	109.55
93.74	136.56	24.22	179.93
128.65	304.76	198.37	215.34
185.84	226.69	97.33	81.55
142.78	199.38	134.9	141.02
223.09	151.94	119.06	79.12
86.98	194.43	147.33	140.04
181.9	189.51	110.33	117.44
215.64	143.4	120.46	204.89
193.29	268.54	123.21
	230.59	132.65
	138.86	74.51
	220.23	114.1
	168.95	156.1
		147.06
		115.63
		39.87
		133.85
		62.17
		40.29
		148.3
		126.32
		86.45
		94.33
		88.36
		56.78
N=31	N=35	N=47	N=30	N=20	N=20

## Sheet: Fig3F
WT_NGM	OGT-1_NGM	WT_Methionine	OGT-1_Methionine	WT_NCT502	OGT-1_NCT502	WT_NCT502+Methionine	OGT-1_NCT502+Methionine
31.04	211.29	140.5	274.8	94.78	82.25	128.8	181.8
19.46	204.43	65.89	158.87	147.12	58.69	157.71	60.65
82.61	192.08	205.11	163.48	156.73	103.75	121.4	151.4
80.47	214.68	135.19	209.1	99.71	100.66	153.39	70.18
158.06	131.31	202.45	135.83	182.89	64.77	119.96	132.96
154.34	176.23	220.35	122.18	169.51	104.96	153.62	98.53							dssa
162.9	105.64	234.22	173.02	154.54	105.73	114.74	88.77
72.86	211.7	227.72	216.53	184.38	96.84	180.87	110.05
57.38	154.81	243.44	175.81	157.12	126.94	158.15	102.04
93.08	98.26	240.3	159.62	195.37	67.58	171.28	142.36
55.72	167.11	187.84	108.57	249.24	167.33	171.81	107.22
70.99	170.49	127.24	121.62	179.82	59.49	206.84	79.47
95.97	215.64	227.42	240.82	165.68	141.2	131.01	108.5
163.06	117.12	162.79	244.65	169.77	128.97	243.7	117.97
178.73	159.47	189.25	132.45	207.64	87.06	196.84	116.15
109.27	189.71	124.99	138.83	197.32	101.47	190.42	117.7
182.22	188.77	148.52	244.68	90.74	186.61	156.39	89.02
151.66	211.89	257.65	177.3	181.05	172.32	163.09	135.68
161.92	220.3	195.94	207.52	323.66	173.02	271.88	69.96
167.89	224.21	146.69	199.05	86.66	83.09	184.06	181.75
85.07	203	155.95	206.6	213.19	150.9	113.19	91.76
103.65	294.56	207.52	130	242.18	164.58	140.76	123.57
93.74	136.56	234.97	187.88	130.32	165.45	178.77	191.45
128.65	304.76	199.18	232.62	209.38	171.08	146.12	158.89
185.84	226.69	153.42	117.42		109.12	212.13	162.37
142.78	199.38	199.41	171.23		98.01	246.5	214.26
223.09	151.94	113.29	145.43		54.7		202.88
86.98	194.43	127.36	139.04		93.68		112.78
181.9	189.51	194.56	194.61		95.31		146.32
215.64	143.4	130.34	116.25		148.14
193.29	268.54	138.74	307.62		201.01
	230.59	171.1	202.22		96.61
	138.86	97.73	204.6		125.26
	220.23	112.24	178.05		118.68
	168.95	75.59	192.9		169.6
		136.1			136.48
		168.05			77.17
		124.86			204.57
		164.12
		193.04
		280.06
		181.96
		105.85
		160.86
		200.56
		185.11
		195.59
		296.34
N=31	N=35	N=47	N=35	N=24	N=38	N=26	N=29

## Sheet: Fig3H
WT_NGM	OGT-1_NGM	OGT-1_sams-1	OGT-1_sams-1_Choline	TU_pmt-1_RNAi	OGT-1_TU_pmt-1_RNAi
31.04	211.29	30.88	112.33	105.69	109.58
19.46	204.43	45.82	128.83	152.41	143.42
82.61	192.08	128.65	118.49	104.27	237.31
80.47	214.68	135.07	118.04	177.01	183.27
158.06	131.31	111.78	47.21	227.71	157.62
154.34	176.23	165.42	97.81	213.91	88.68
162.9	105.64	89.73	106.47	233.48	161.52
72.86	211.7	73.28	60.63	162.75	140.81
57.38	154.81	92.1	73.93	195.53	142.19
93.08	98.26	30.16	116.74	152.67	129.53
55.72	167.11	33.15	101.26	169.53	129.61
70.99	170.49	86.26	95.03	196.86	246.4
95.97	215.64	148.71	91.89	159.7	82.89
163.06	117.12	134.17	40.5	169.33	152.07
178.73	159.47	70.58	106.07	227.5	216.37
109.27	189.71	127.13	64.3	185.78	230.99
182.22	188.77	42.3	146.63	203.73	241.4
151.66	211.89	140.48	124.04	209.85	118.61
161.92	220.3	53.33	62.84	160.78
167.89	224.21	55.35	52.03	150.24
85.07	203	39.06	68.12
103.65	294.56	107.55	116.57
93.74	136.56	24.22	85.98
128.65	304.76	198.37	92.79
185.84	226.69	97.33	98.43
142.78	199.38	134.9	149.92
223.09	151.94	119.06	41.74
86.98	194.43	147.33	180.51
181.9	189.51	110.33	122.59
215.64	143.4	120.46	72.88
193.29	268.54	123.21	148.08
	230.59	132.65	81.33
	138.86	74.51	114.16
	220.23	114.1
	168.95	156.1
		147.06
		115.63
		39.87
		133.85
		62.17
		40.29
		148.3
		126.32
		86.45
		94.33
		88.36
		56.78
N=31	N=35	N=47	N=33	N=20	N=18

## Sheet: Fig3I
TU_RNAi_Cntrl	OGT-1_TU_RNAi_Cntrl	TU_set-2_RANi	OGT-1_TU_set-2_RANi	TU_set-11_RANi	OGT-1_TU_set-11_RANi	TU_set-16_RANi	OGT-1_TU_set-16_RANi	TU_set-17_RNAi	OGT-1_TU_set-17_RNAi
80.02	165.22	147.11	175.85	213.53	208.17	199.33	90.83	168.23	149.56
106.67	131.14	138.67	188.47	165.14	274.4	278.52	200.29	101.36	153.47
89.1	142.83	185.43	127.97	104.24	155.47	94.44	125.19	153.69	252.3
46.78	147.53	181.12	213.77	124.66	229.31	218.27	317.08	153.47	81.77
96.38	167.78	241.34	131.47	155.88	145.68	115.5	190.34	94.39	258.16
102.05	119.04	103.95	264.58	103.34	140.15	190.72	107.59	220.8	216.49
71.48	89.31	164.7	212.71	94.64	94.09	194.29	182.72	276.46	75.02
66.52	189.82	76.97	154.84	180.96	188.63	189.17	171.54	272.34	139.5
94.4	223.61	209.83	209.47	74.68	104.17	145.23	303.2	284.73	153.58
116.56	168.33	80.87	146.27	228.21	214.59	134.34	177.11	143.19	167.71
112.33	117.45	163.41	122.45	184.09	163.53	191.77	129.53	106.78	162.67
60.14	129.9	185.6	104.41	140.37	146.02	266.1	149.57	237.51	156.36
134.16	139.5	79.8	182.72	163.1	196.6	264	158.58	110.13	92.68
106.33	112.19	204.03	175.31	235.67	180.36	94.68	145.58	141.06	236.4
71.43	216.76	188.16	241.08	195.01	247.12	255.49	155.91	164.23	229.24
61.24	205.13	123.63	164.45	163.35	147.26	185.52	267.55		119.92
69.86	205.36	235.93	202.8	116.71	250.17	279.77	155.76		224.2
80.2	206.76	131.17	71.26	192.6		108.33	235.58		144.55
62.49	136.32	171.99	99.25	135.49		117.57	248.67		164.26
172.73	214.62	94.73	86.27	139.66		155.29			130.36
115.27	137.19		156.19	182.48		252.9			163.15
172.22	132.82		192.06	183.27					144.83
151.66	142.25		214.95	162.04					258.18
161.92	173.55		149.52						155.8
157.89	233.71		173.62
95.07	125.79		288.55
103.65	125.94
103.74	194.33
126.65	121.81
N=29	N=29	N=20	N=26	N=23	N=17	N=21	N=19	N=15	N=24
