# Supplementary material for: O-GlcNAc signaling increases neuron regeneration through one-carbon metabolism in Caenorhabditis elegans
Source: eLife. 2024 Feb 9;13:e86478. doi: 10.7554/eLife.86478 (PMC10857789; doi:10.7554/eLife.86478)
Supplement: Figure 4—figure supplement 1—source data 1. [file elife-86478-fig4-figsupp1-data1.xlsx]

## Sheet: Sheet1
TU_RNAi_Cntrl	OGT-1_TU_RNAi_Cntrl	OGT-1_TU_mce-1_RNAi	Ogt-1_TU_acdh-1_RNAi
80.02	165.22	194.64	115.54
106.67	131.14	195.96	123.06
89.1	142.83	160.17	88.68
46.78	147.53	142.87	93.99
96.38	167.78	185.98	80
102.05	119.04	159.19	106.73
71.48	89.31	114.19	101.54
66.52	189.82	65.95	121.39
94.4	223.61	182.07	181.65
116.56	168.33	69.83	87.28
112.33	117.45	125.84	86.74
60.14	129.9	182.1	134.03
134.16	139.5	154.55	114.1
106.33	112.19	151.46	185.9
71.43	216.76	152.58	125.08
61.24	205.13	148.66	140.22
69.86	205.36	191.26	140.75
80.2	206.76	185.77	142.35
62.49	136.32	140.37	71.13
172.73	214.62	174.76
115.27	137.19	92.38
172.22	132.82	51.31
151.66	142.25	97.2
161.92	173.55
157.89	233.71
95.07	125.79
103.65	125.94
103.74	194.33
126.65	121.81
N=29	N=29	N=23	N=19
