# Supplementary material for: O-GlcNAc signaling increases neuron regeneration through one-carbon metabolism in Caenorhabditis elegans
Source: eLife. 2024 Feb 9;13:e86478. doi: 10.7554/eLife.86478 (PMC10857789; doi:10.7554/eLife.86478)
Supplement: Figure 4—figure supplement 1—source data 2. [file elife-86478-fig4-figsupp1-data2.xlsx]

## Sheet: Sheet1
TU_RNAi_Cntrl	OGT-1_TU_RNAi_Cntrl	TU-cpt-2-RNAi	ogt-1_TU-cpt-2_RNAi	TU-acs-2_RNAi	ogt-1_TU_acs-2_RNAi
80.02	165.22	172.23	169.12	115.56	195.87
106.67	131.14	110.41	171.44	164.22	221.23
89.1	142.83	91.94	195.13	158.48	149.25
46.78	147.53	105.66	123.04	197.87	201.33
96.38	167.78	191.74	205.72	88.23	147.82
102.05	119.04	156.56	74.86	146.09	95.1
71.48	89.31	76.56	121.01	211.27	179.99
66.52	189.82	188.2	220.37	112.61	219.77
94.4	223.61	123.92	107.78	201.05	108.89
116.56	168.33	145.38	214.85	137.79	160.42
112.33	117.45	190.33	135.13	186.63	104.05
60.14	129.9	180.51	151.62	159.45	56.12
134.16	139.5	181.41	95.61	58.43	92.6
106.33	112.19	153.98	197.83	141.43	201.09
71.43	216.76	128.21	113.44	182.96
61.24	205.13	212	127.12	113.97
69.86	205.36		130.71	155.27
80.2	206.76		124.5	152.89
62.49	136.32		117.51
172.73	214.62		187.28
115.27	137.19		107.49
172.22	132.82
151.66	142.25
161.92	173.55
157.89	233.71
95.07	125.79
103.65	125.94
103.74	194.33
126.65	121.81
N=29	N=29	N=16	N=21	N=19	N=15
