# Supplementary material for: O-GlcNAc signaling increases neuron regeneration through one-carbon metabolism in Caenorhabditis elegans
Source: eLife. 2024 Feb 9;13:e86478. doi: 10.7554/eLife.86478 (PMC10857789; doi:10.7554/eLife.86478)
Supplement: Figure 4—source data 1. [file elife-86478-fig4-data1.xlsx]

## Sheet: Fig4B
WT_NGM	OGT-1_NGM	TU_gss-1_RNAi	OGT-1_TU_gss-1_RNAi	WT_GHS_10mM	OGT-1_GHS_10mM
31.04	211.29	175.16	114.89	99	99
19.46	204.43	221.97	221.16	141.43	141.43
82.61	192.08	156.1	229.47	114.98	114.98
80.47	214.68	180.12	259.75	222.42	222.42
158.06	131.31	94.12	256.88	112.04	112.04
154.34	176.23	178.77	259.05	37.22	37.22
162.9	105.64	160.95	231.88	98.74	98.74
72.86	211.7	138.74	153.18	108.36	108.36
57.38	154.81	190.31	248.11	96.37	96.37
93.08	98.26	142.8	214.48	105.97	105.97
55.72	167.11	116.32	89.43	112.98	112.98
70.99	170.49	148.54	108.41	215.66	215.66
95.97	215.64	159.41	130.8	92.69	92.69
163.06	117.12	209.01	149.48	140.54	140.54
178.73	159.47	216.07	162.39	60.69	60.69
109.27	189.71	82.77	56.3	83.89	83.89
182.22	188.77	168.54	191.58	105.14	105.14
151.66	211.89	83.09	201.9	145.28	145.28
161.92	220.3	156.77	230.59	133.62	133.62
167.89	224.21	190.5	166.63	195.6	195.6
85.07	203	212.65	194.68	101.97	101.97
103.65	294.56	256.3	193.52	110.33	110.33
93.74	136.56	105	58.26	105.92	105.92
128.65	304.76		160.15	104.61	104.61
185.84	226.69			100.76	100.76
142.78	199.38
223.09	151.94
86.98	194.43
181.9	189.51
215.64	143.4
193.29	268.54
	230.59
	138.86
	220.23
	168.95
N=31	N=35	N=23	N=24	N=25	N=25

## Sheet: Fig4C
WT_NGM	OGT-1_NGM	WT_L-Cystathionine	OGT-1_L-Cystathionine	WT_ NCT502+L-Cystathionine	OGT-1_ NCT502+L-Cystathionine	OGT-1_NCT502
31.04	211.29	219.78	226.49	211.84	195.26	82.25
19.46	204.43	112.61	189.12	216.12	159.41	58.69
82.61	192.08	145.58	230.4	160.75	185.47	103.75
80.47	214.68	175.06	203.49	202.52	202.14	100.66
158.06	131.31	162.47	270.18	216.2	193.9	64.77
154.34	176.23	167.23	183.38	160.32	154.22	104.96
162.9	105.64	142.64	232.66	246.97	151.91	105.73
72.86	211.7	119.06	210.58	174.65	132.09	96.84
57.38	154.81	92	169.64	138.72	145.31	126.94
93.08	98.26	152.22	149.42	236.57	154.34	67.58
55.72	167.11	113.83	194.13	114.09	166.59	167.33
70.99	170.49	139.57	281.78	218.45	119.37	59.49
95.97	215.64	128.49	187.57	122.29	217.94	141.2
163.06	117.12	83.23	172.65	187.4	86.33	128.97
178.73	159.47	131.74	184.46	181.34	195.97	87.06
109.27	189.71	145.39	158.41	227.62	147.12	101.47
182.22	188.77	189.17	156.65	146.76	237.9	186.61
151.66	211.89	159.44	149.02	110.72	156.35	172.32
161.92	220.3	148.77	151.98	112.1	227.55	173.02
167.89	224.21	162.97	159.21	216.11	182.96	83.09
85.07	203	113.21	159.59	228.4	205.57	150.9
103.65	294.56	144.01	172.65	177.45	237.58	164.58
93.74	136.56	232.88		182.64	264.83	165.45
128.65	304.76	211.23		293.35	129.95	171.08
185.84	226.69	171.93		263.61	102.25	109.12
142.78	199.38			182.67	188.97	98.01
223.09	151.94			196.15	305.26	54.7
86.98	194.43			242.34	64.25	93.68
181.9	189.51			135.72	260.43	95.31
215.64	143.4			203.27	181.17	148.14
193.29	268.54			199.25	104.78	201.01
	230.59			113.77	134.54	96.61
	138.86			132.84	132.48	125.26
	220.23			153.23	90.14	118.68
	168.95			173.7	178.48	169.6
				214.82	132.2	136.48
				266.75	159.27	77.17
				264.04		204.57
				140.42
				182.67
				200.71
				152.85
				153.35
				224.21
N=31	N=35	N=25	N=22	N=44	N=37	N=38

## Sheet: Fig4F
WT_NGM	OGT-1_NGM	ACDH-1_zdis-5	OGT_1_acdh-1	MCE-1_zdis-5	OGT-1_TU_mce-1	OGT-1_TU_mce-1_acdh-1 RNAi
31.04	211.29	164.9	287.14	145.19	133.98	83.48
19.46	204.43	128.83	222.22	157.95	113.83	174.14
82.61	192.08	63.46	157.43	120.52	112.53	227.81
80.47	214.68	27.45	102.89	156.06	240.84	190.57
158.06	131.31	99.66	169.78	121.14	171.83	171.24
154.34	176.23	167.87	154.87	86.32	176.95	172.21
162.9	105.64	190.5	194.71	114.12	127.12	221.74
72.86	211.7	86.54	85.04	216.76	177.83	246.51
57.38	154.81	67.07	141.46	116.64	215.41	214.66
93.08	98.26	119.62	119.77	94.55	283.76	116.4
55.72	167.11	65.78	136.14	164.55	167.24	145.39
70.99	170.49	165.69	98.31	191.42	181.75	136.4
95.97	215.64	190.14	191.43	133.38	209.49	94.17
163.06	117.12	96.81	129.85	93.92	173.95	219.49
178.73	159.47	188.28	151.03	173.21	118.98	190.52
109.27	189.71	143.22	169.89	186.03	138.46	159.68
182.22	188.77	208.35	47.48	67.28	260.35	237.21
151.66	211.89	83.95	179.5	65.03	153.24	198.98
161.92	220.3	179.32	257.81	173.29	113.21	246.23
167.89	224.21	190.75	121.12	64.43	198.83	111.61
85.07	203	175.43	98.73			140.11
103.65	294.56	269.91	159.45			125.02
93.74	136.56	139.01	110.83			195.44
128.65	304.76	147.04	109.59			195.03
185.84	226.69		113.98			187.51
142.78	199.38					172.08
223.09	151.94					140.18
86.98	194.43					237.75
181.9	189.51
215.64	143.4
193.29	268.54
	230.59
	138.86
	220.23
	168.95
N=31	N=35	N=24	N=25	N=20	N=20	N=28

## Sheet: Fig4G
WT_NGM	OGT-1_NGM	TU_pod-2_RNAi	OGT-1_TU_pod-2_RNAi	TU_atp-3_RNAi	OGT-1-TU_atp-3_RNAi
31.04	211.29	85.09	215.56	83.26	132.13
19.46	204.43	158.93	245.32	86.75	110.03
82.61	192.08	119.17	232.85	122.07	161.97
80.47	214.68	177.41	245.03	115.14	69.81
158.06	131.31	193.72	248.17	89.29	121.03
154.34	176.23	95.92	179.37	153.55	71.25
162.9	105.64	66.95	192.79	189.56	169.28
72.86	211.7	126.16	178.72	73.28	39.63
57.38	154.81	113.1	231.21	123.69	64.1
93.08	98.26	130.06	258.55	123.19	158.79
55.72	167.11	144.01	292.96	154.32	155.31
70.99	170.49	95.61	142.73	72.89	139.8
95.97	215.64	145.13	151.27	111.81	169.24
163.06	117.12	101.29	188.05	89.86	101.66
178.73	159.47	120.08	123.45	111.8	171.46
109.27	189.71	184.29	126.6	118.58	188.53
182.22	188.77	175.32	271.42	95.09	85
151.66	211.89	148.83	274.04	175.12	80.48
161.92	220.3	96.7	195.28	106.9	152.65
167.89	224.21	144.25	299.89	81.98	74.16
85.07	203	201.43	261.56	178.9	120.19
103.65	294.56	97.44	100.87	231.12	146.67
93.74	136.56	119.39	268.46	129.52	100.63
128.65	304.76	217.59		215.61	118.57
185.84	226.69			181.25	78.81
142.78	199.38			189.69	129.41
223.09	151.94			161.09	83.73
86.98	194.43			136.61
181.9	189.51			90.58
215.64	143.4
193.29	268.54
	230.59
	138.86
	220.23
	168.95
N=31	N=35	N=24	N=23	N=29	N=27
